# Supplementary material
Source: PubMed Central journal article supplement (PMC4118676)

**Total Synthesis of Maoecrystal V: Early-Stage C–H Functionalization and Lactone Formation by Radical Cyclization**

Ping Lu, Zhenhua Gu, Armen Zakarian\*

Department of Chemistry and Biochemistry, University of California, Santa Barbara, CA 93106, Telephone: (805)-893-3717; Fax: (805)-893-4120; E-mail: zakarian@chem.ucsb.edu

SUPPORTING INFORMATION 2

COPIES OF NMR SPECTRA

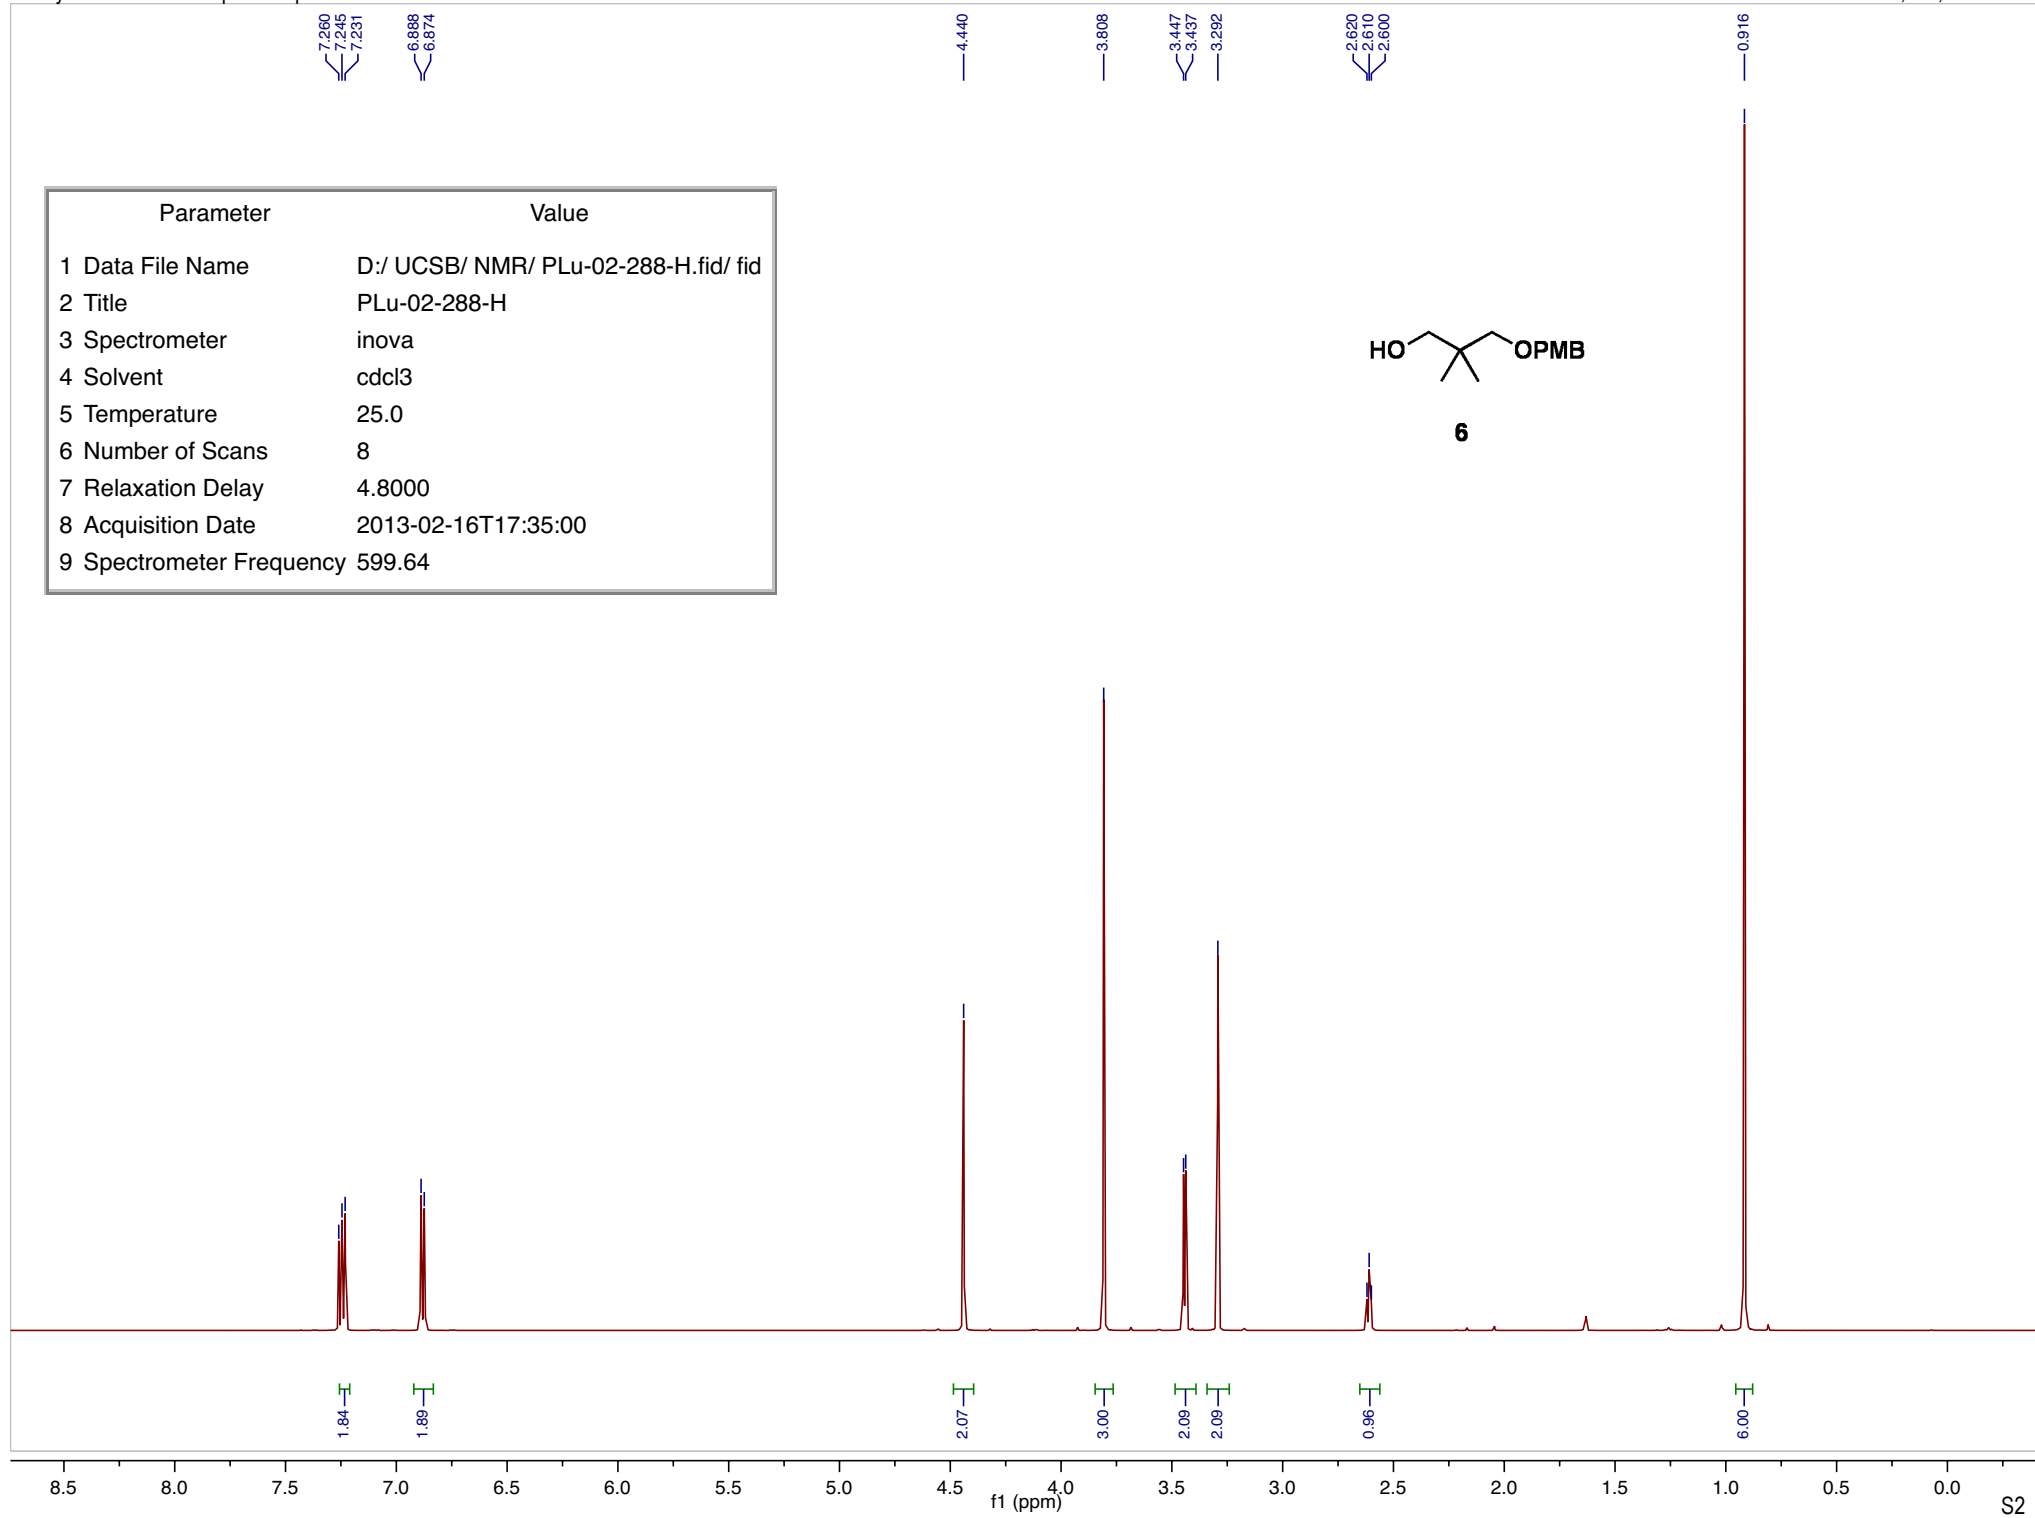

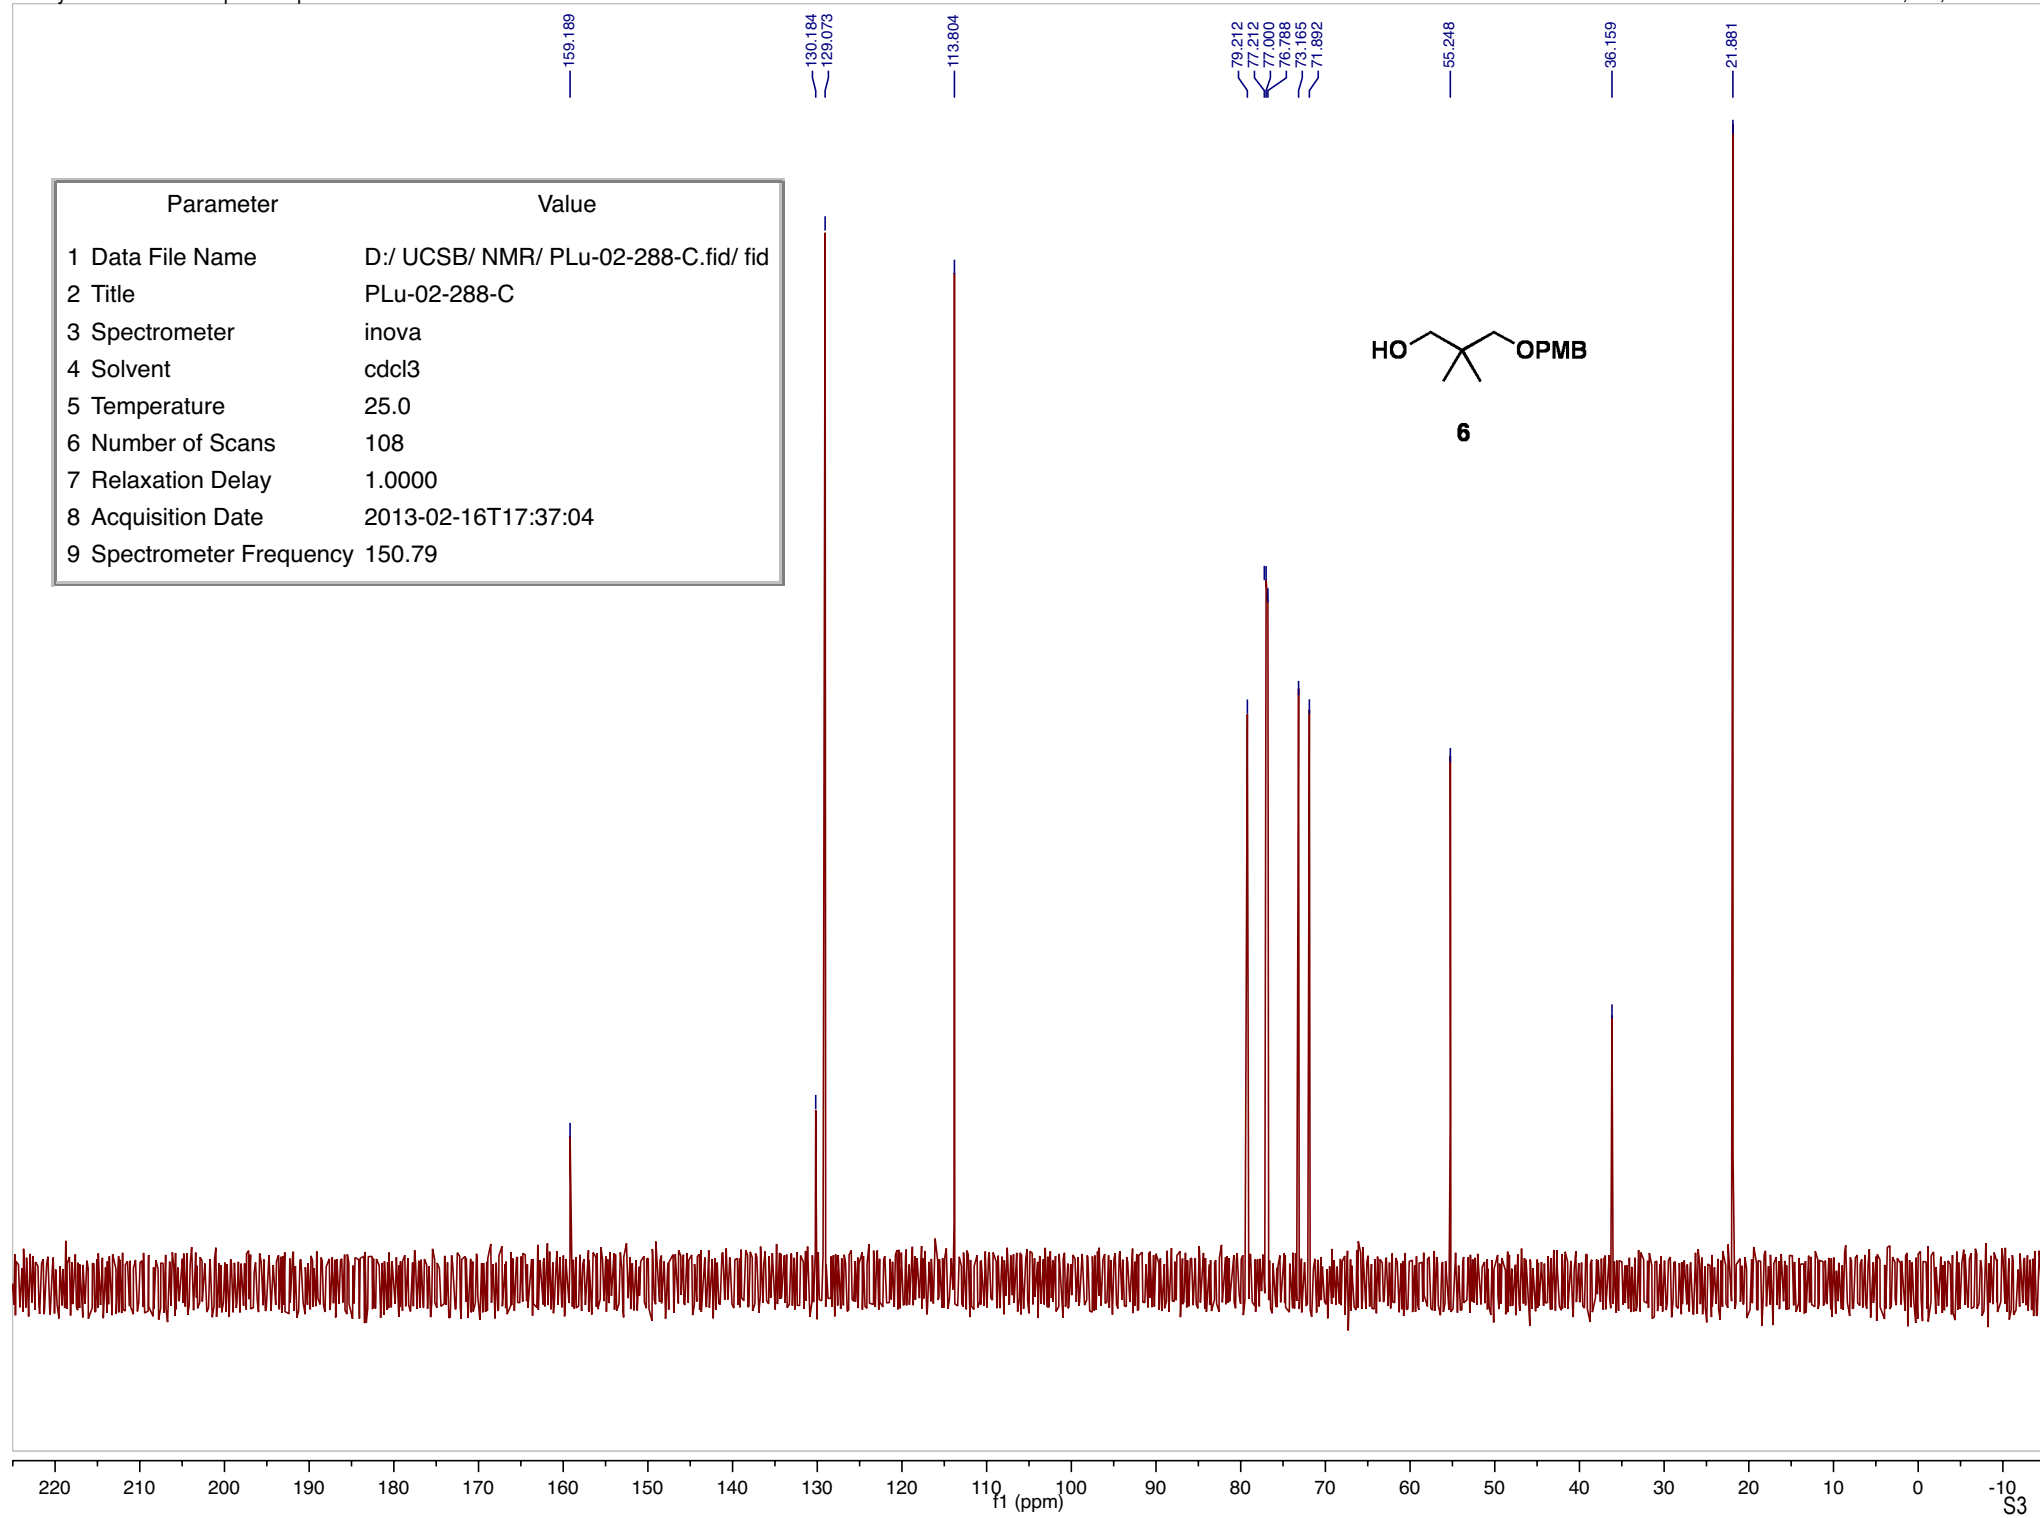

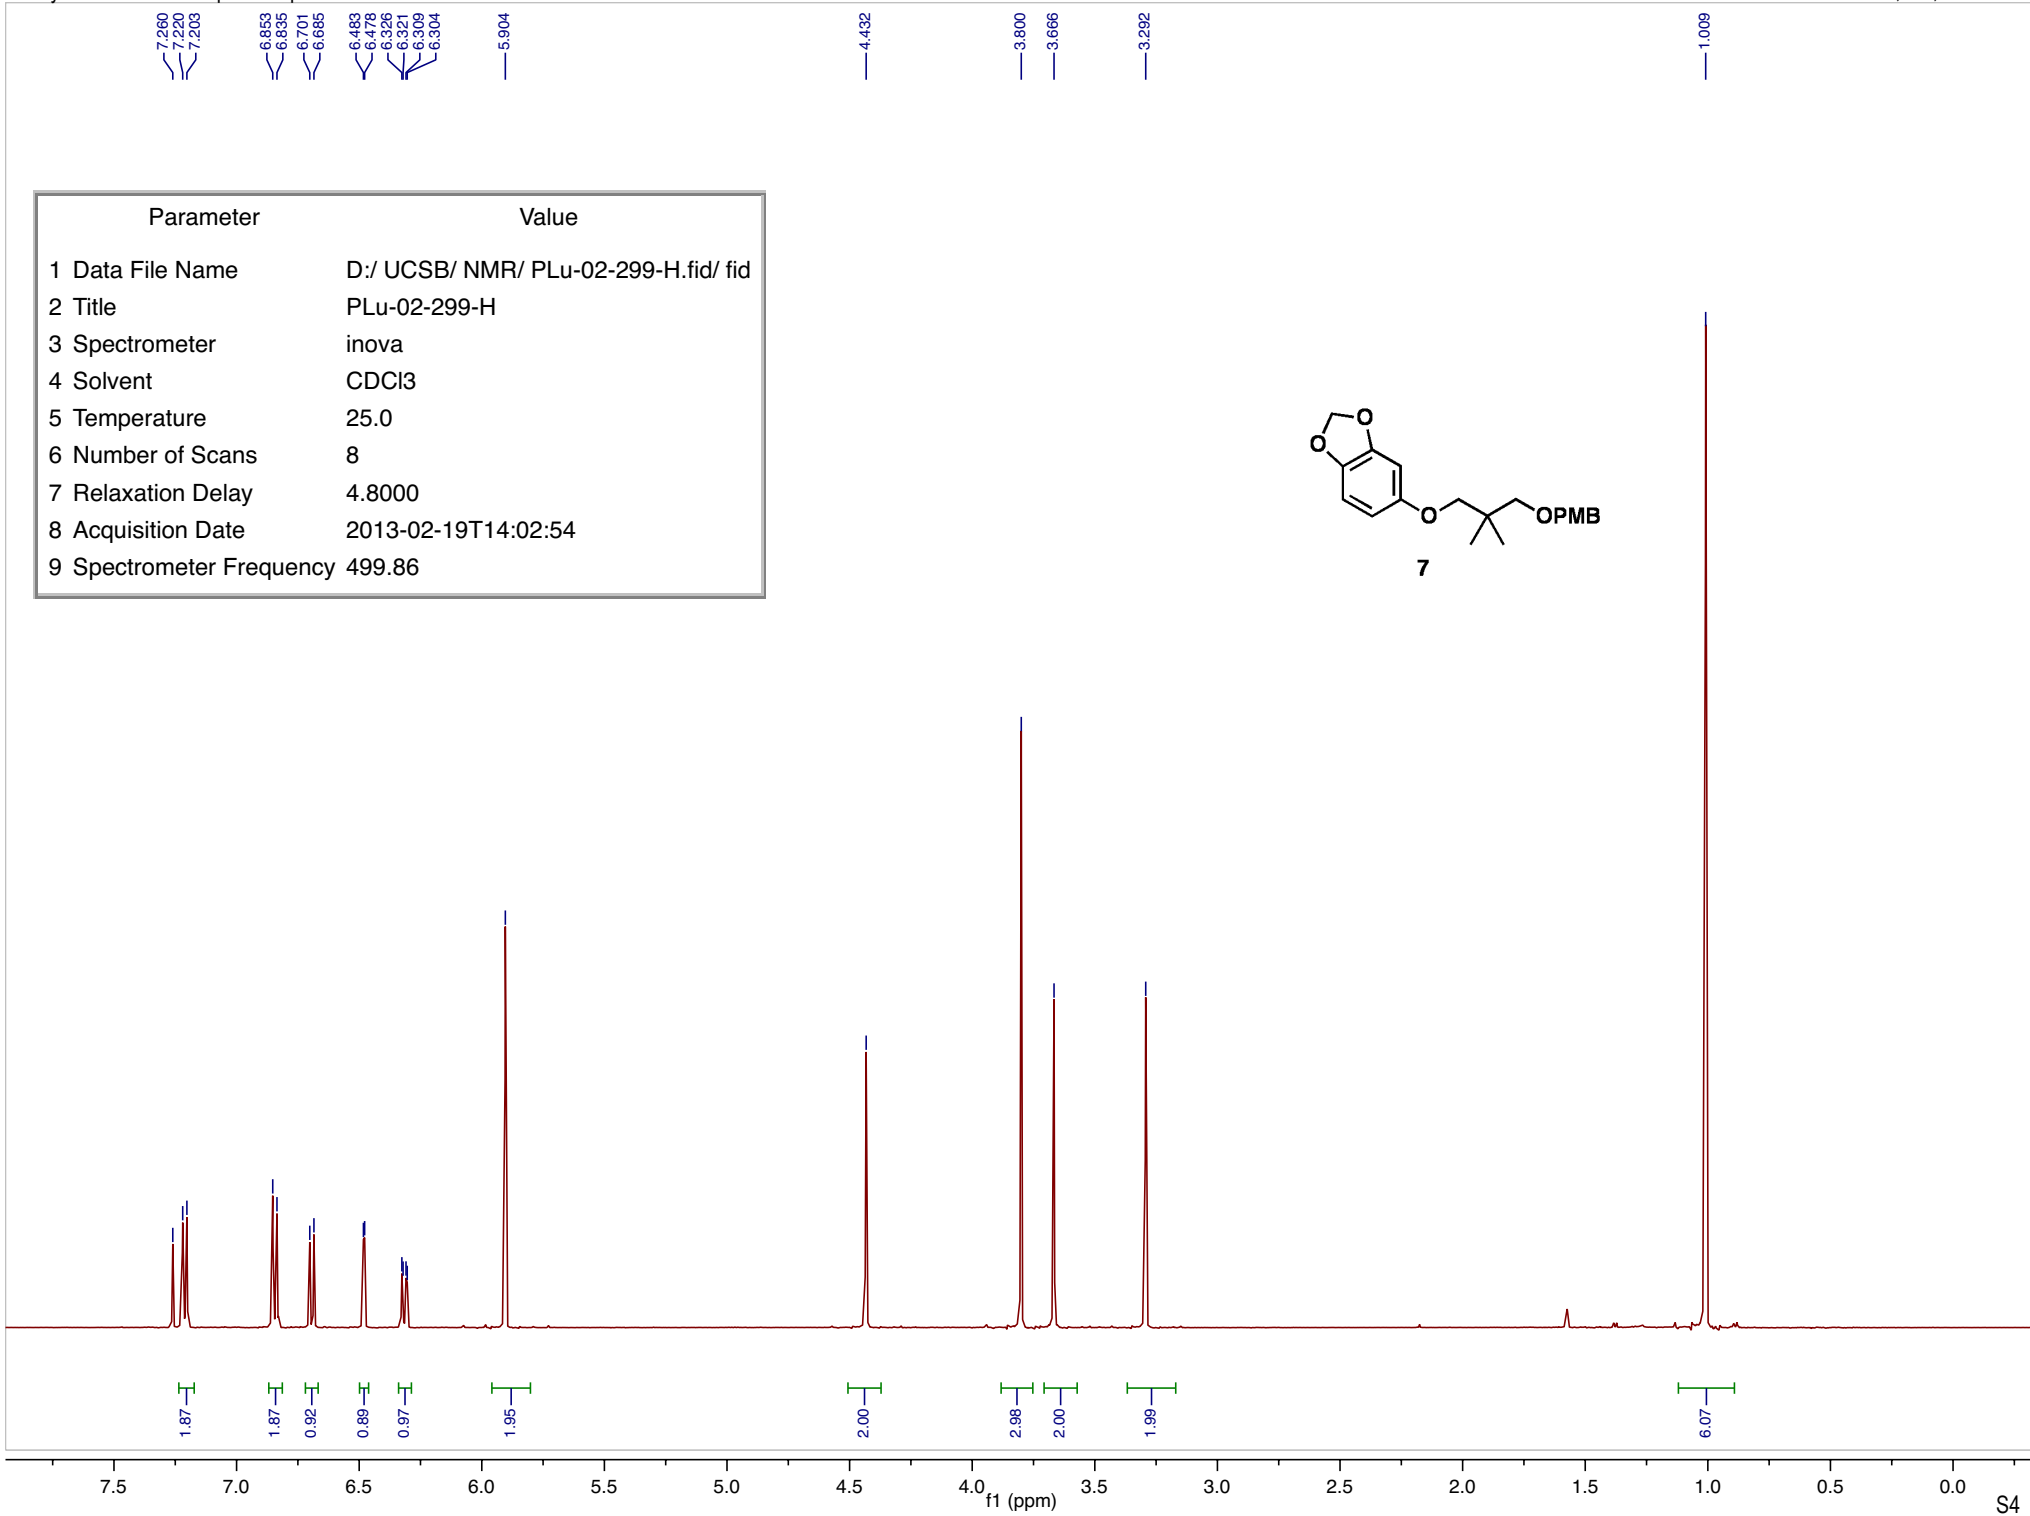

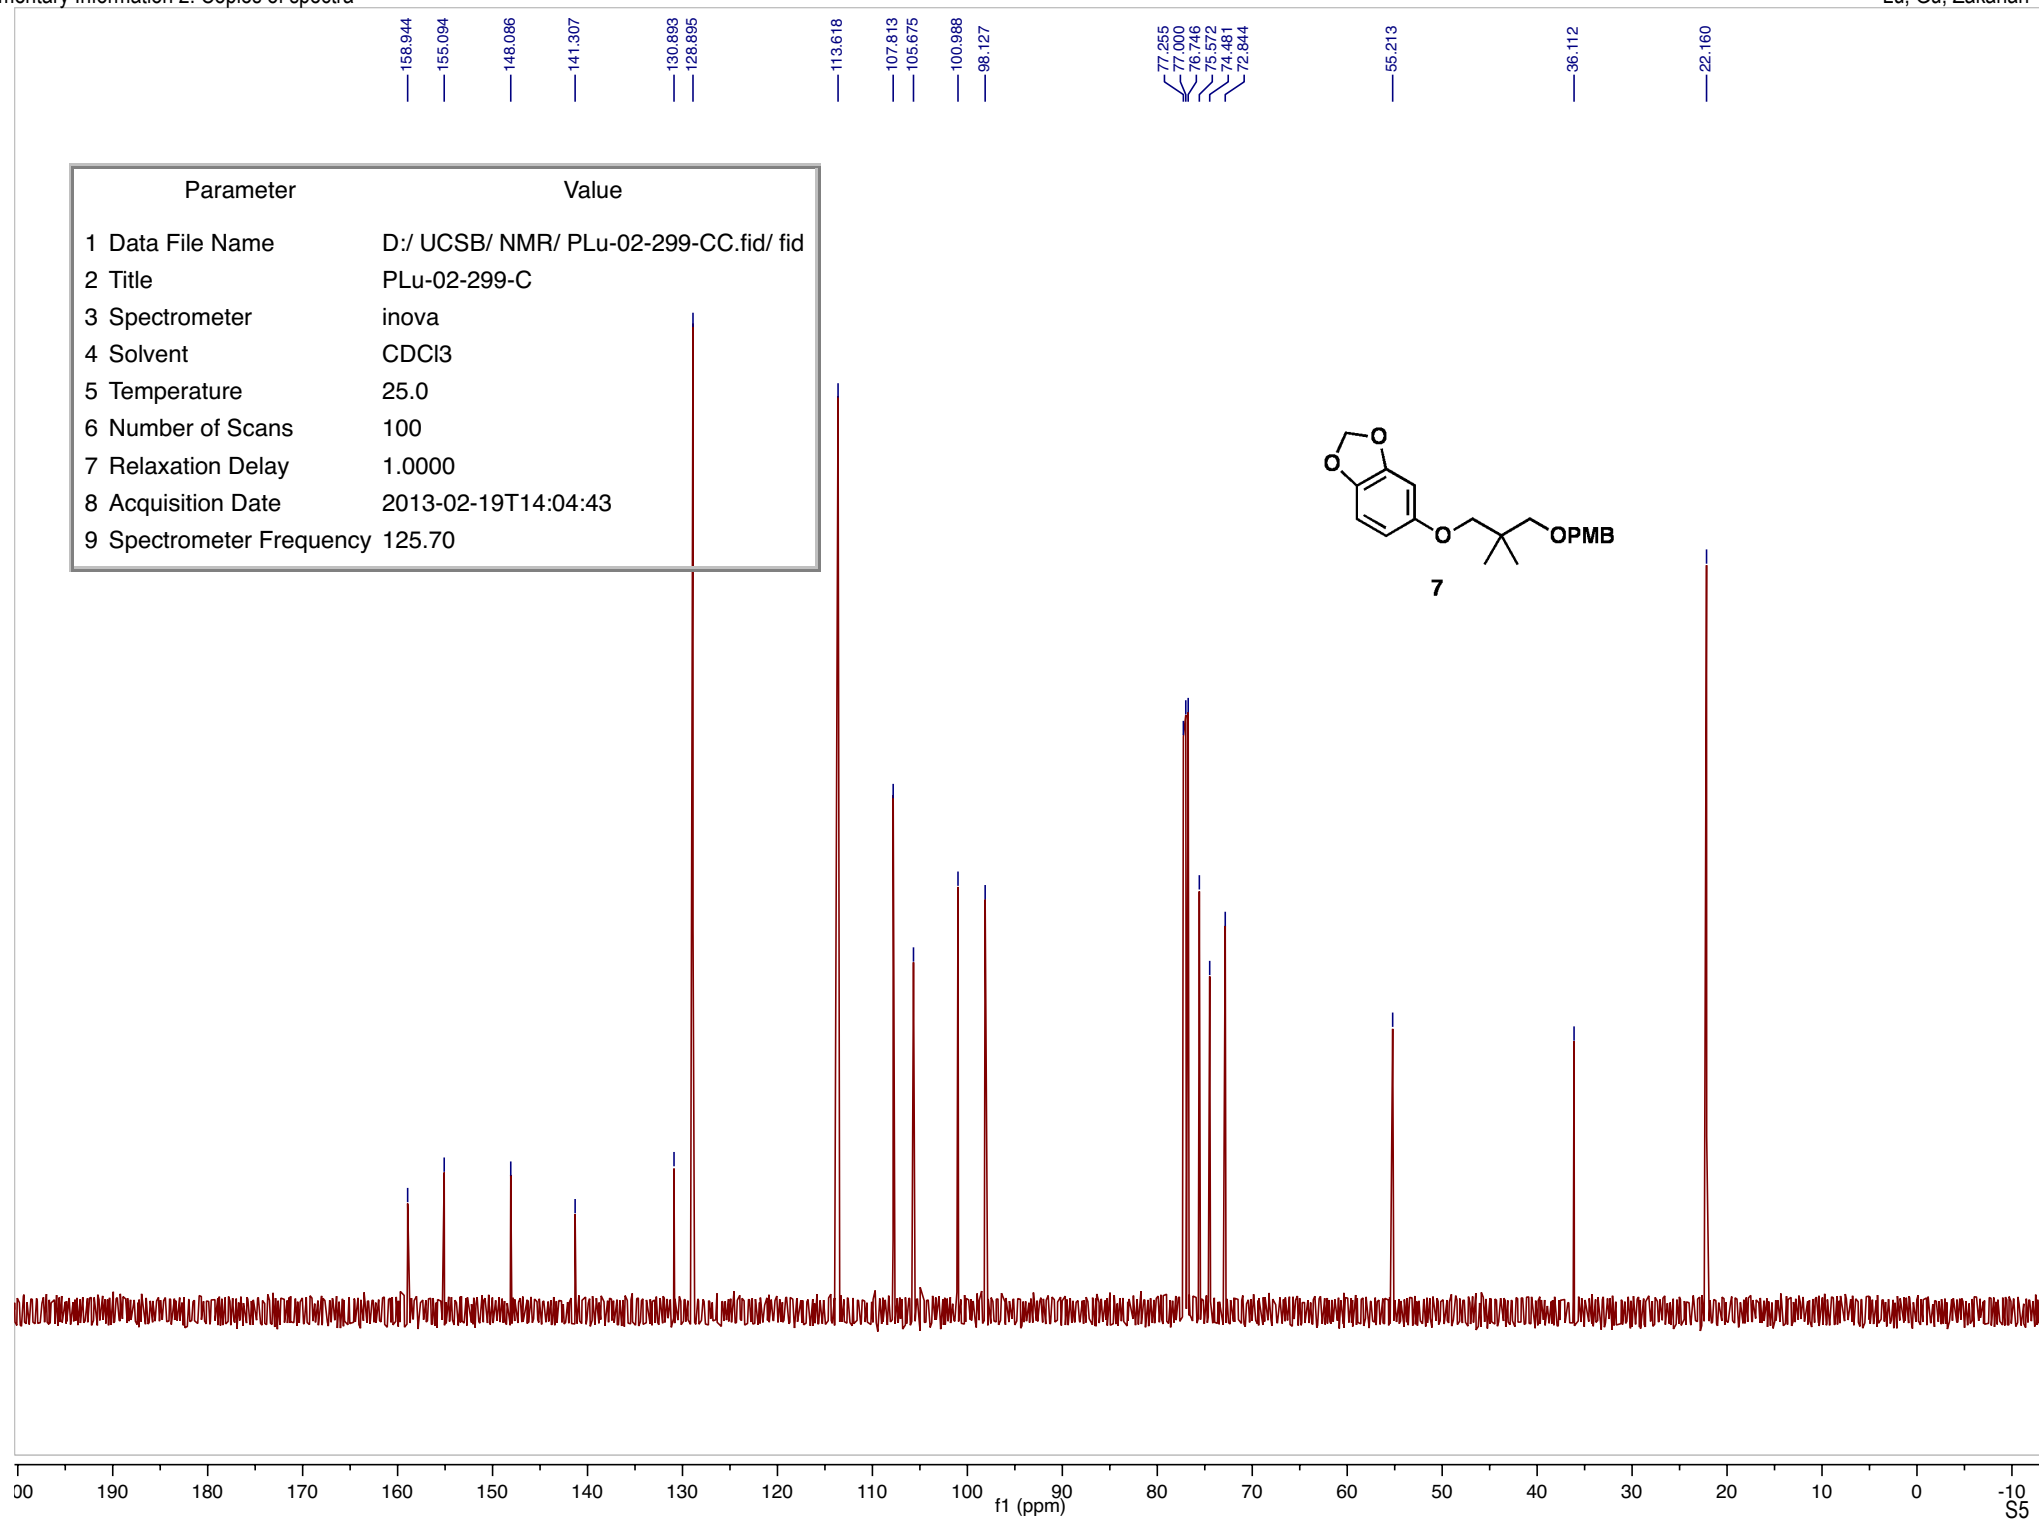

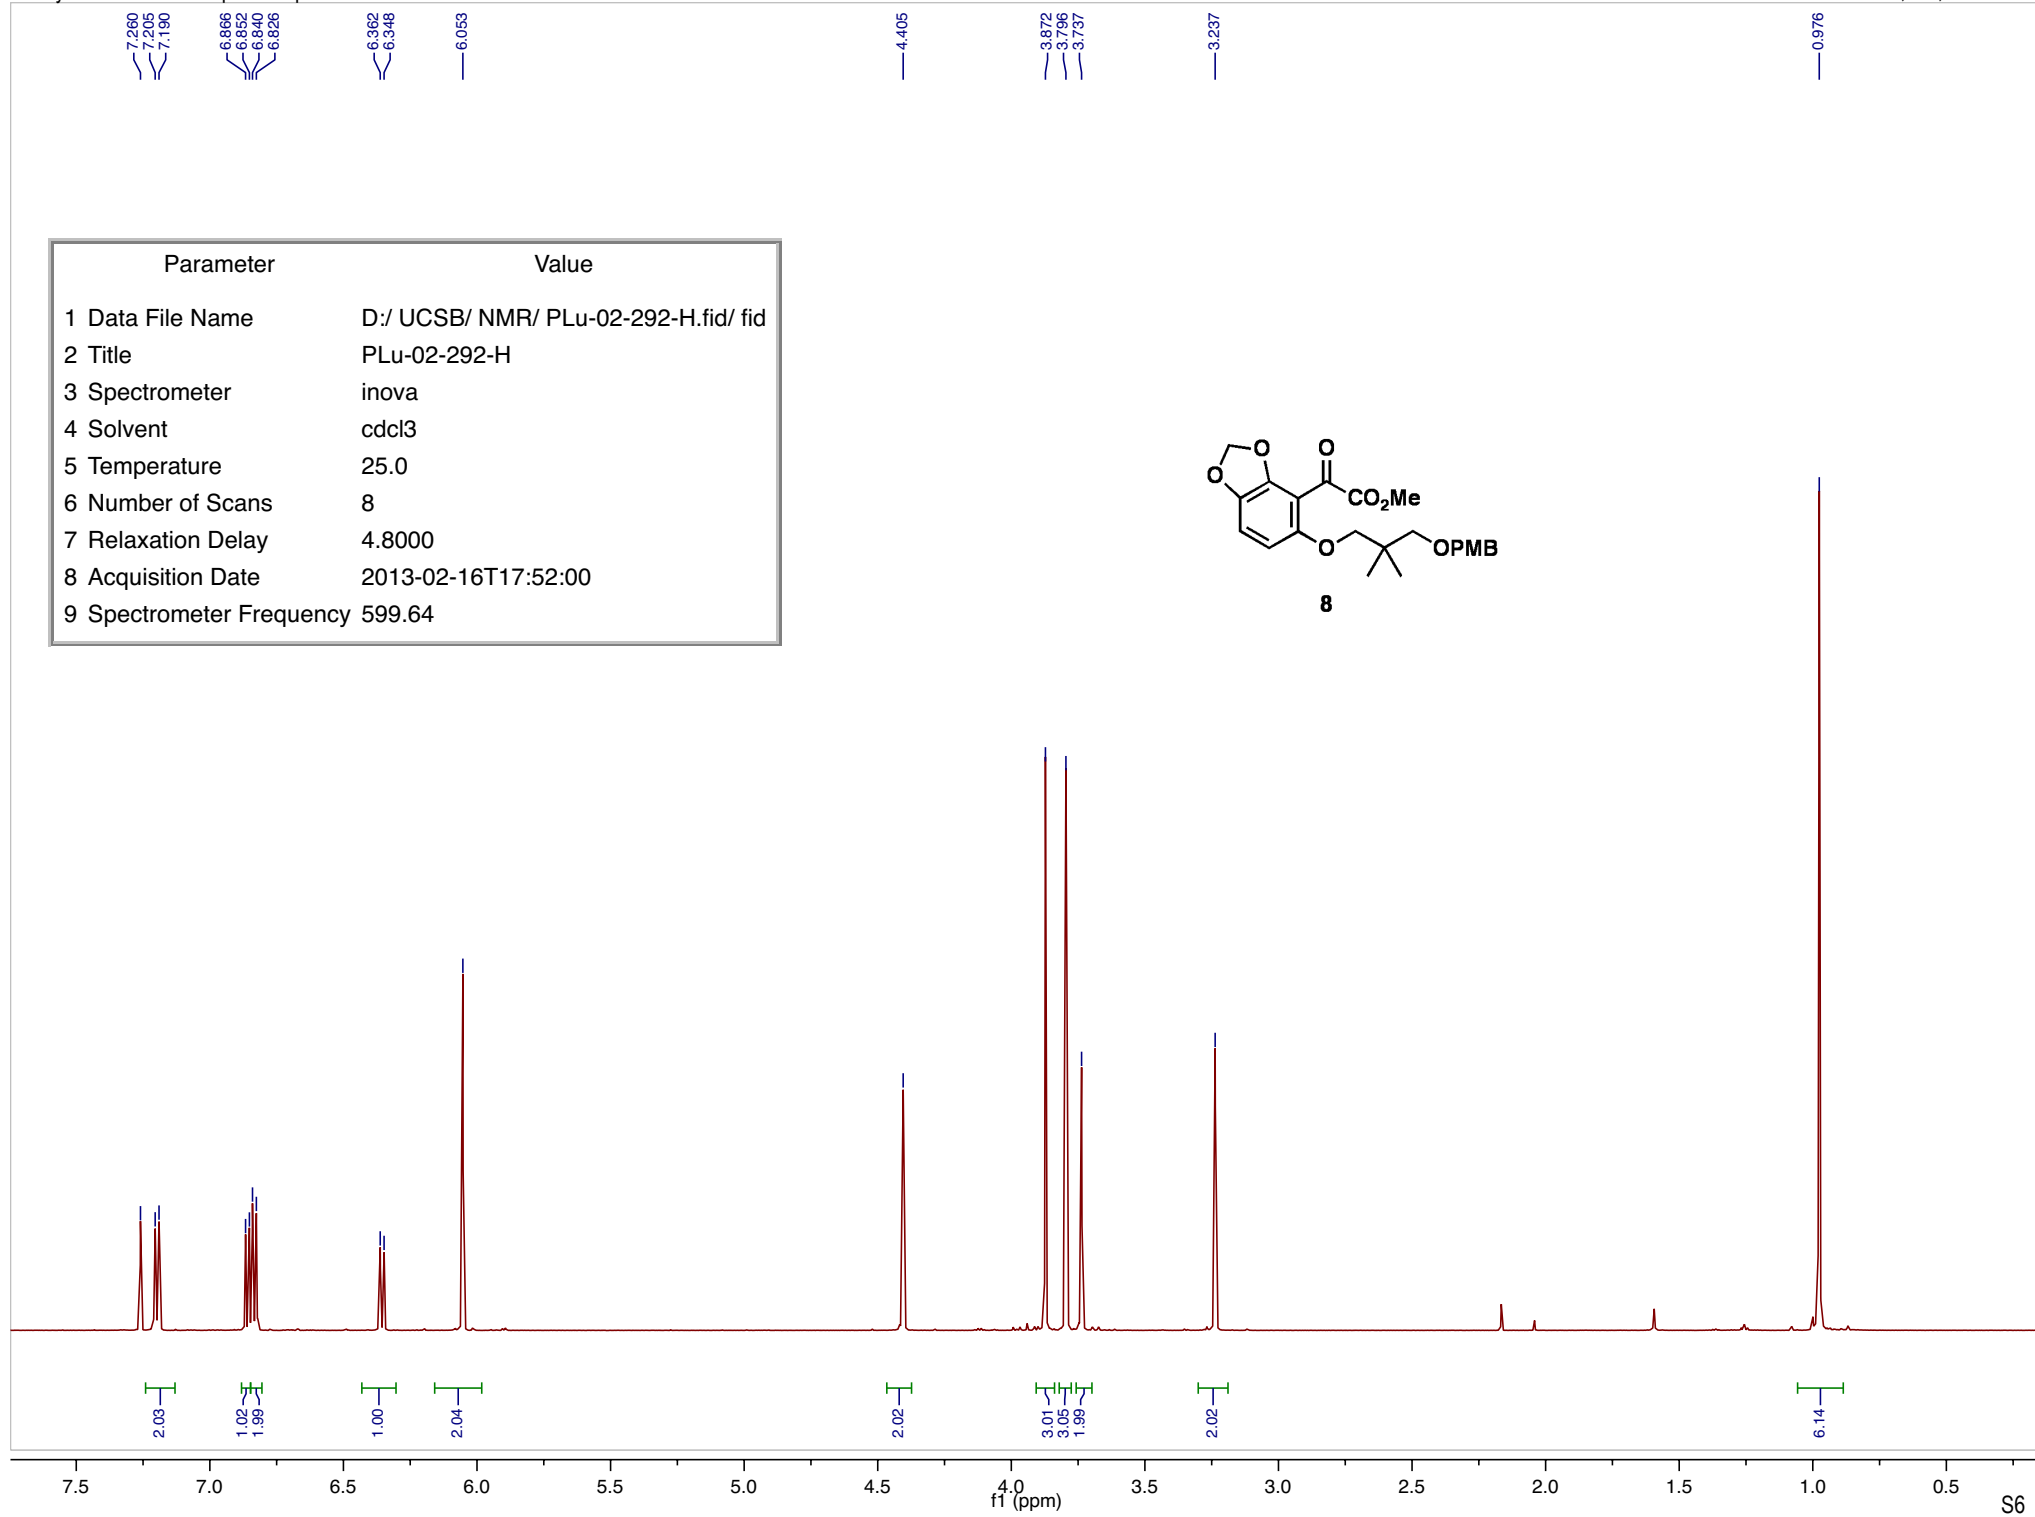

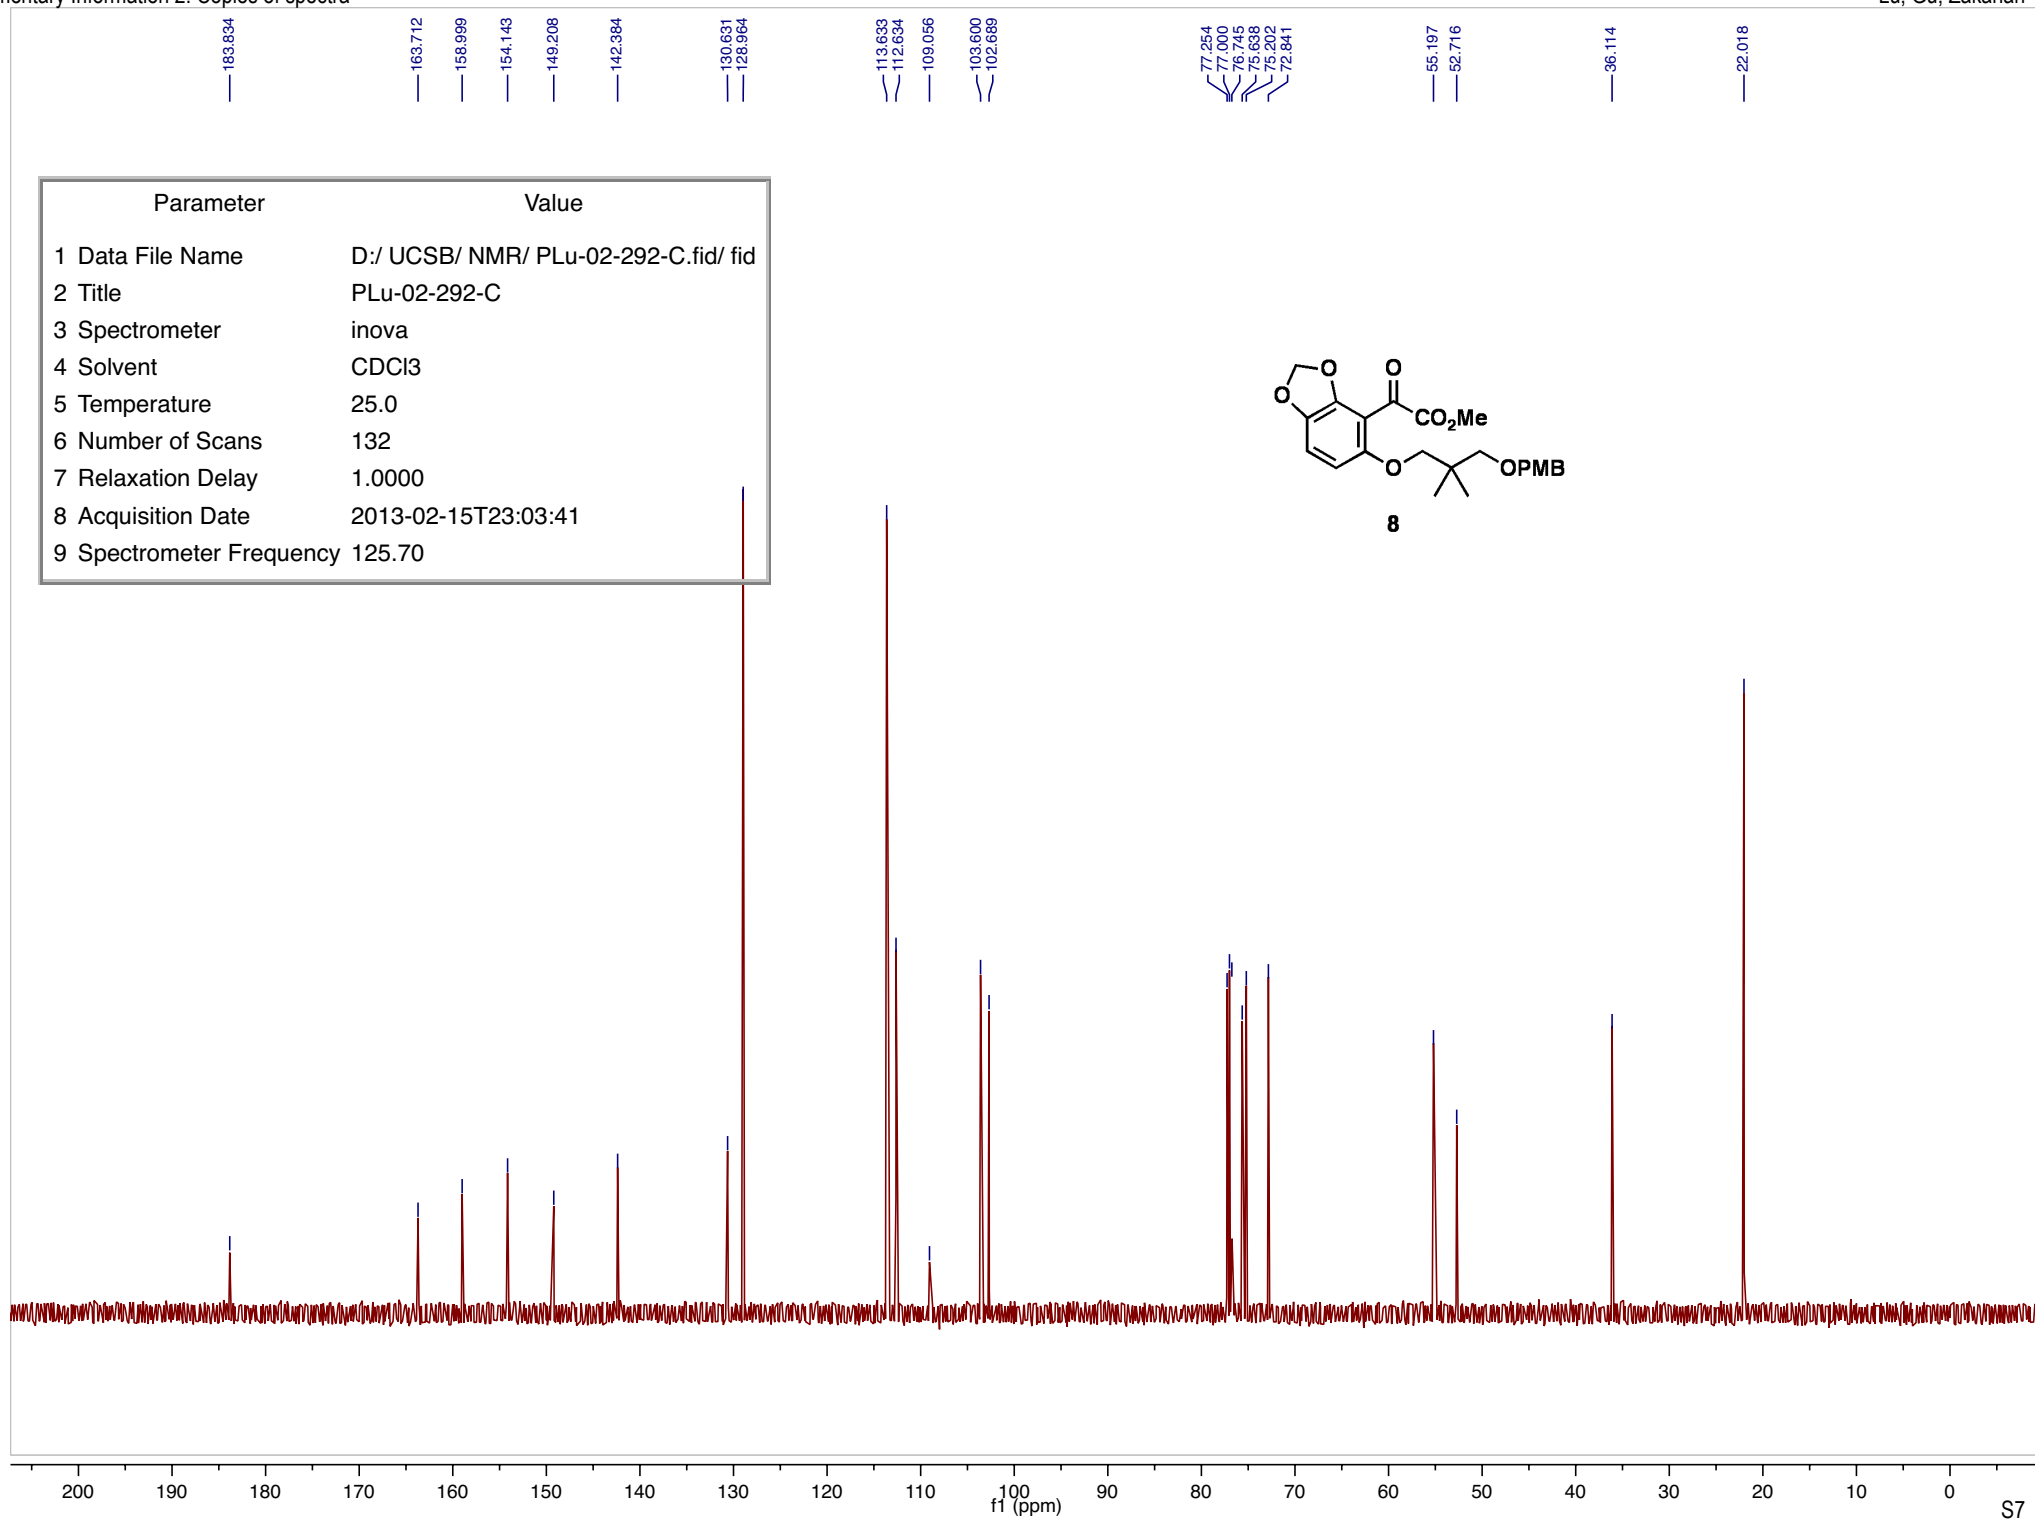

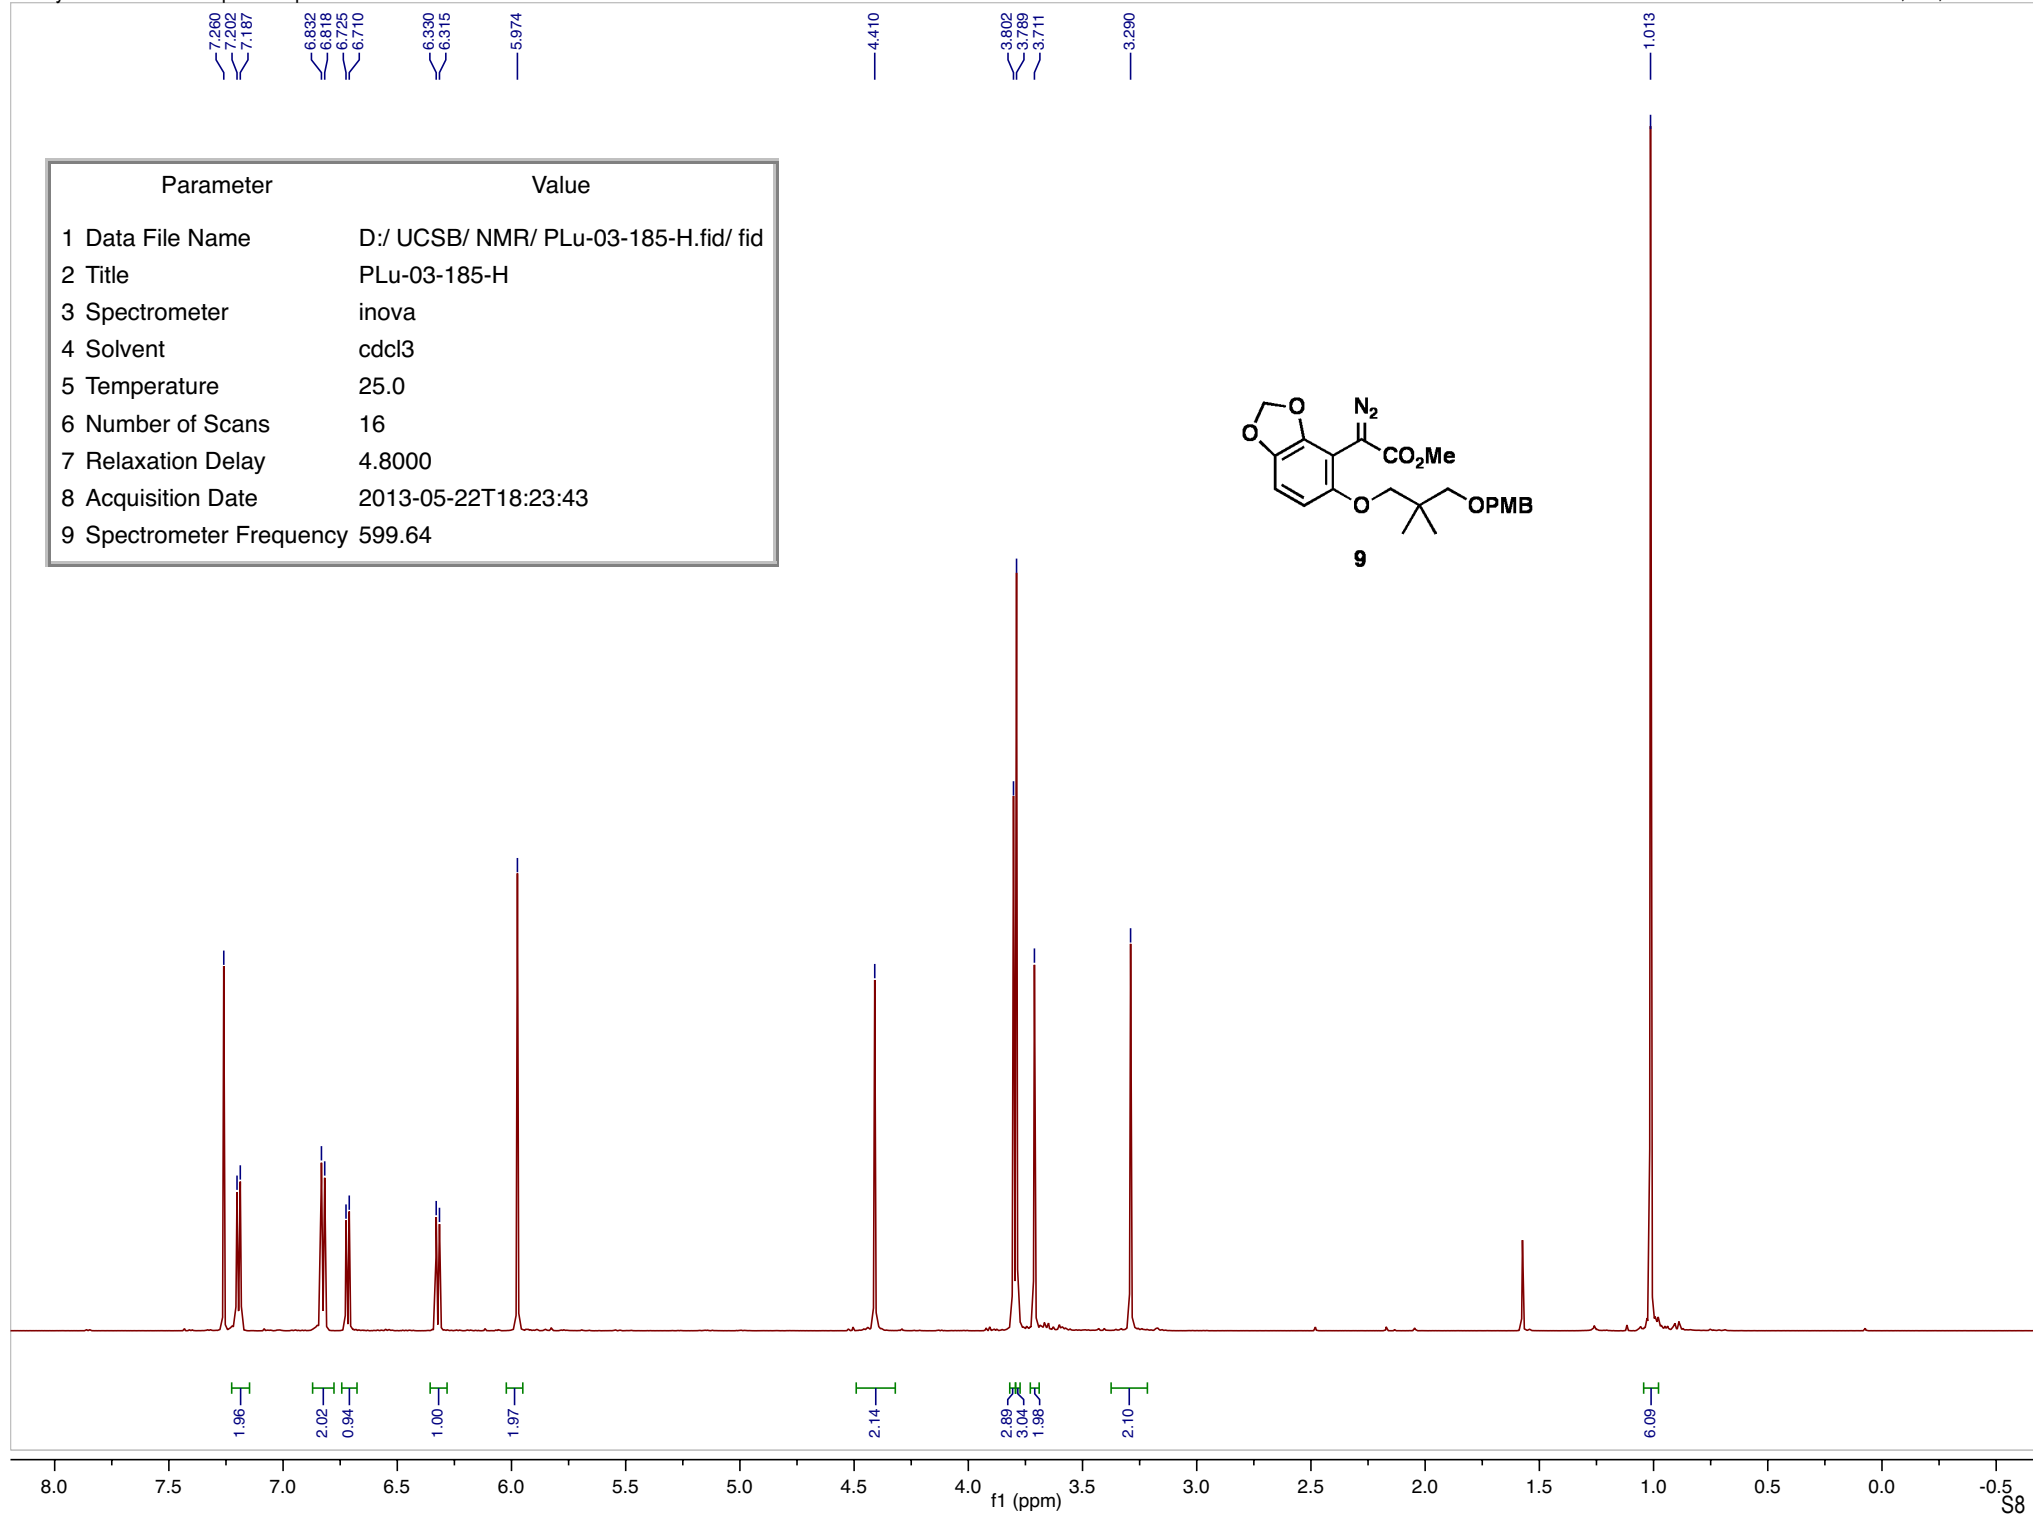



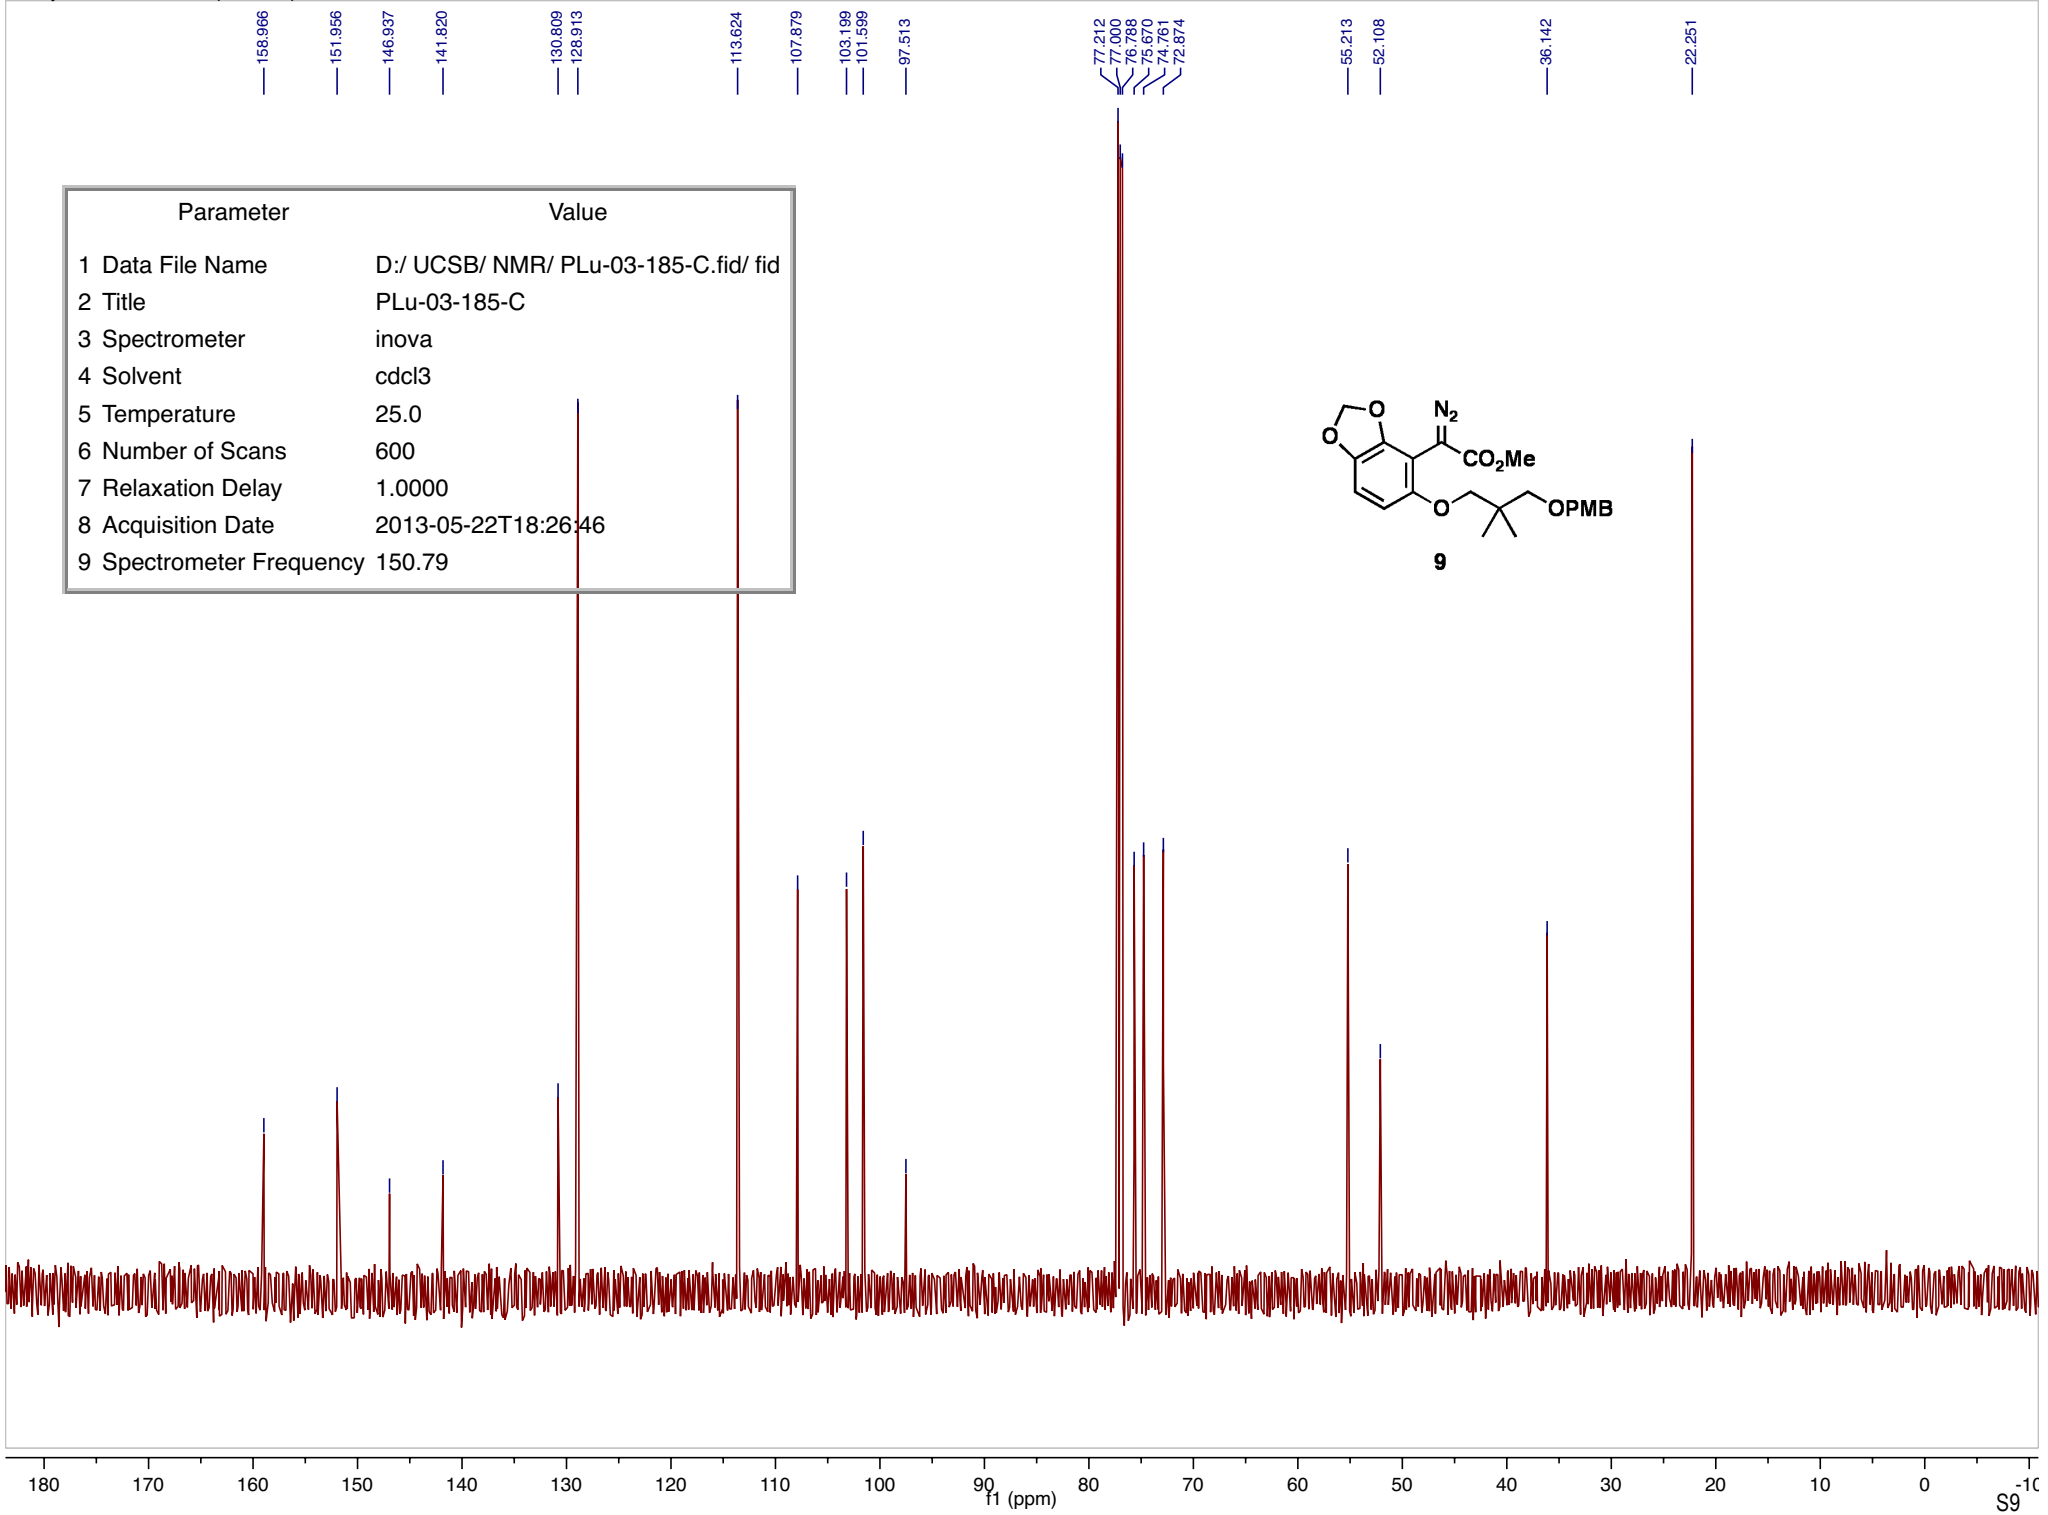

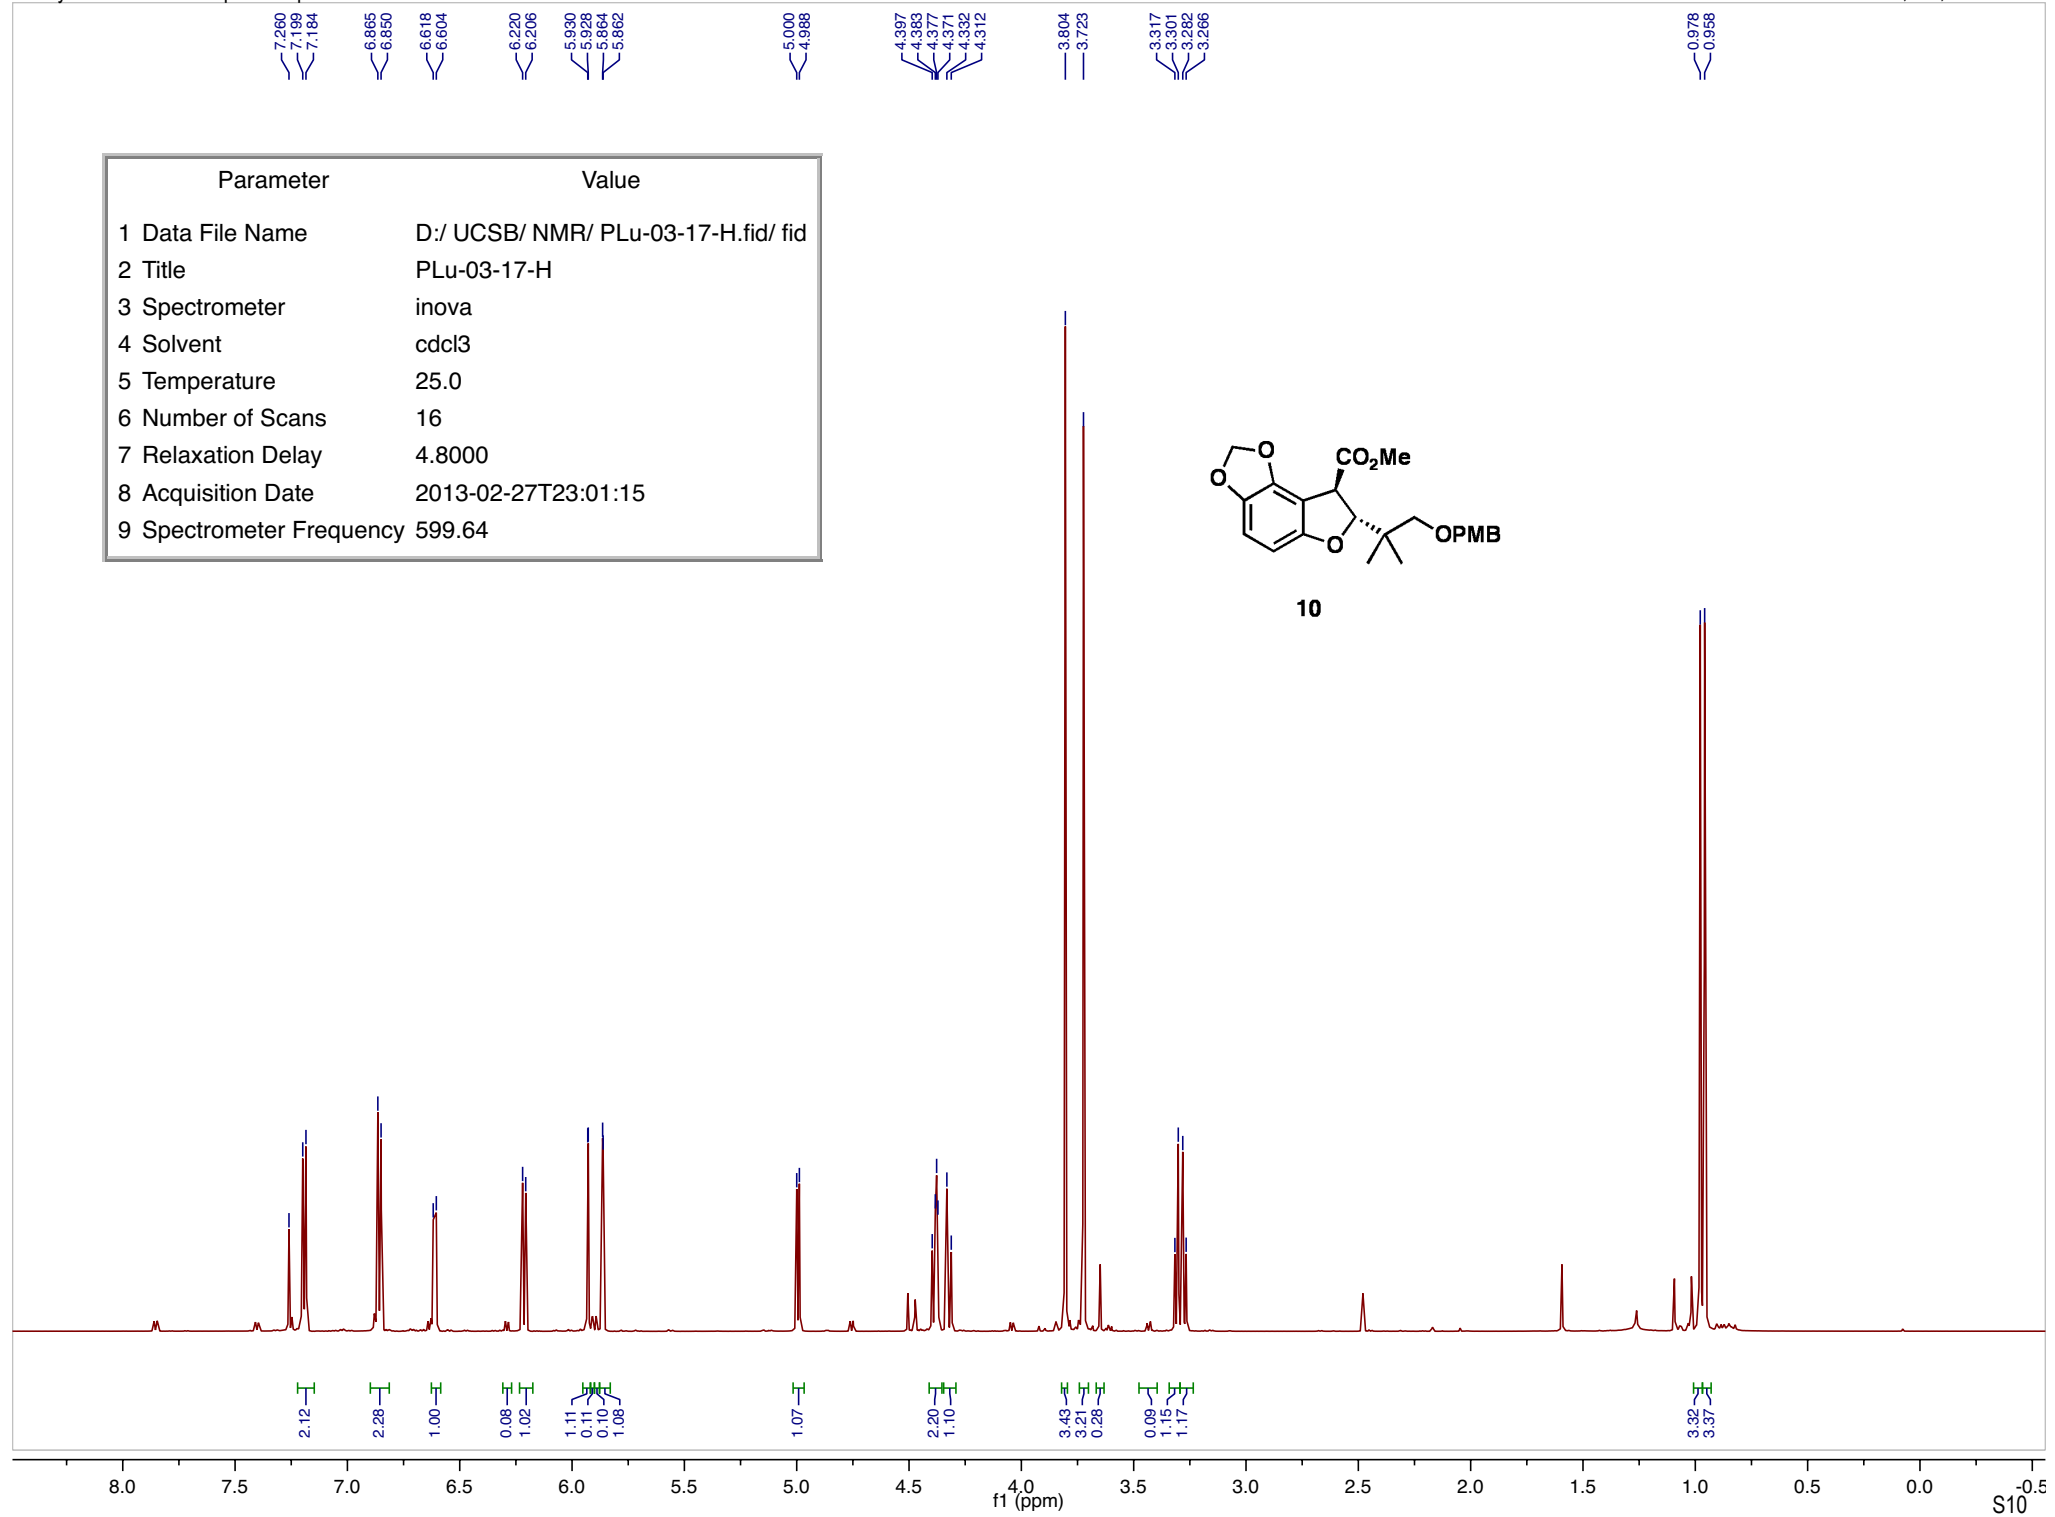

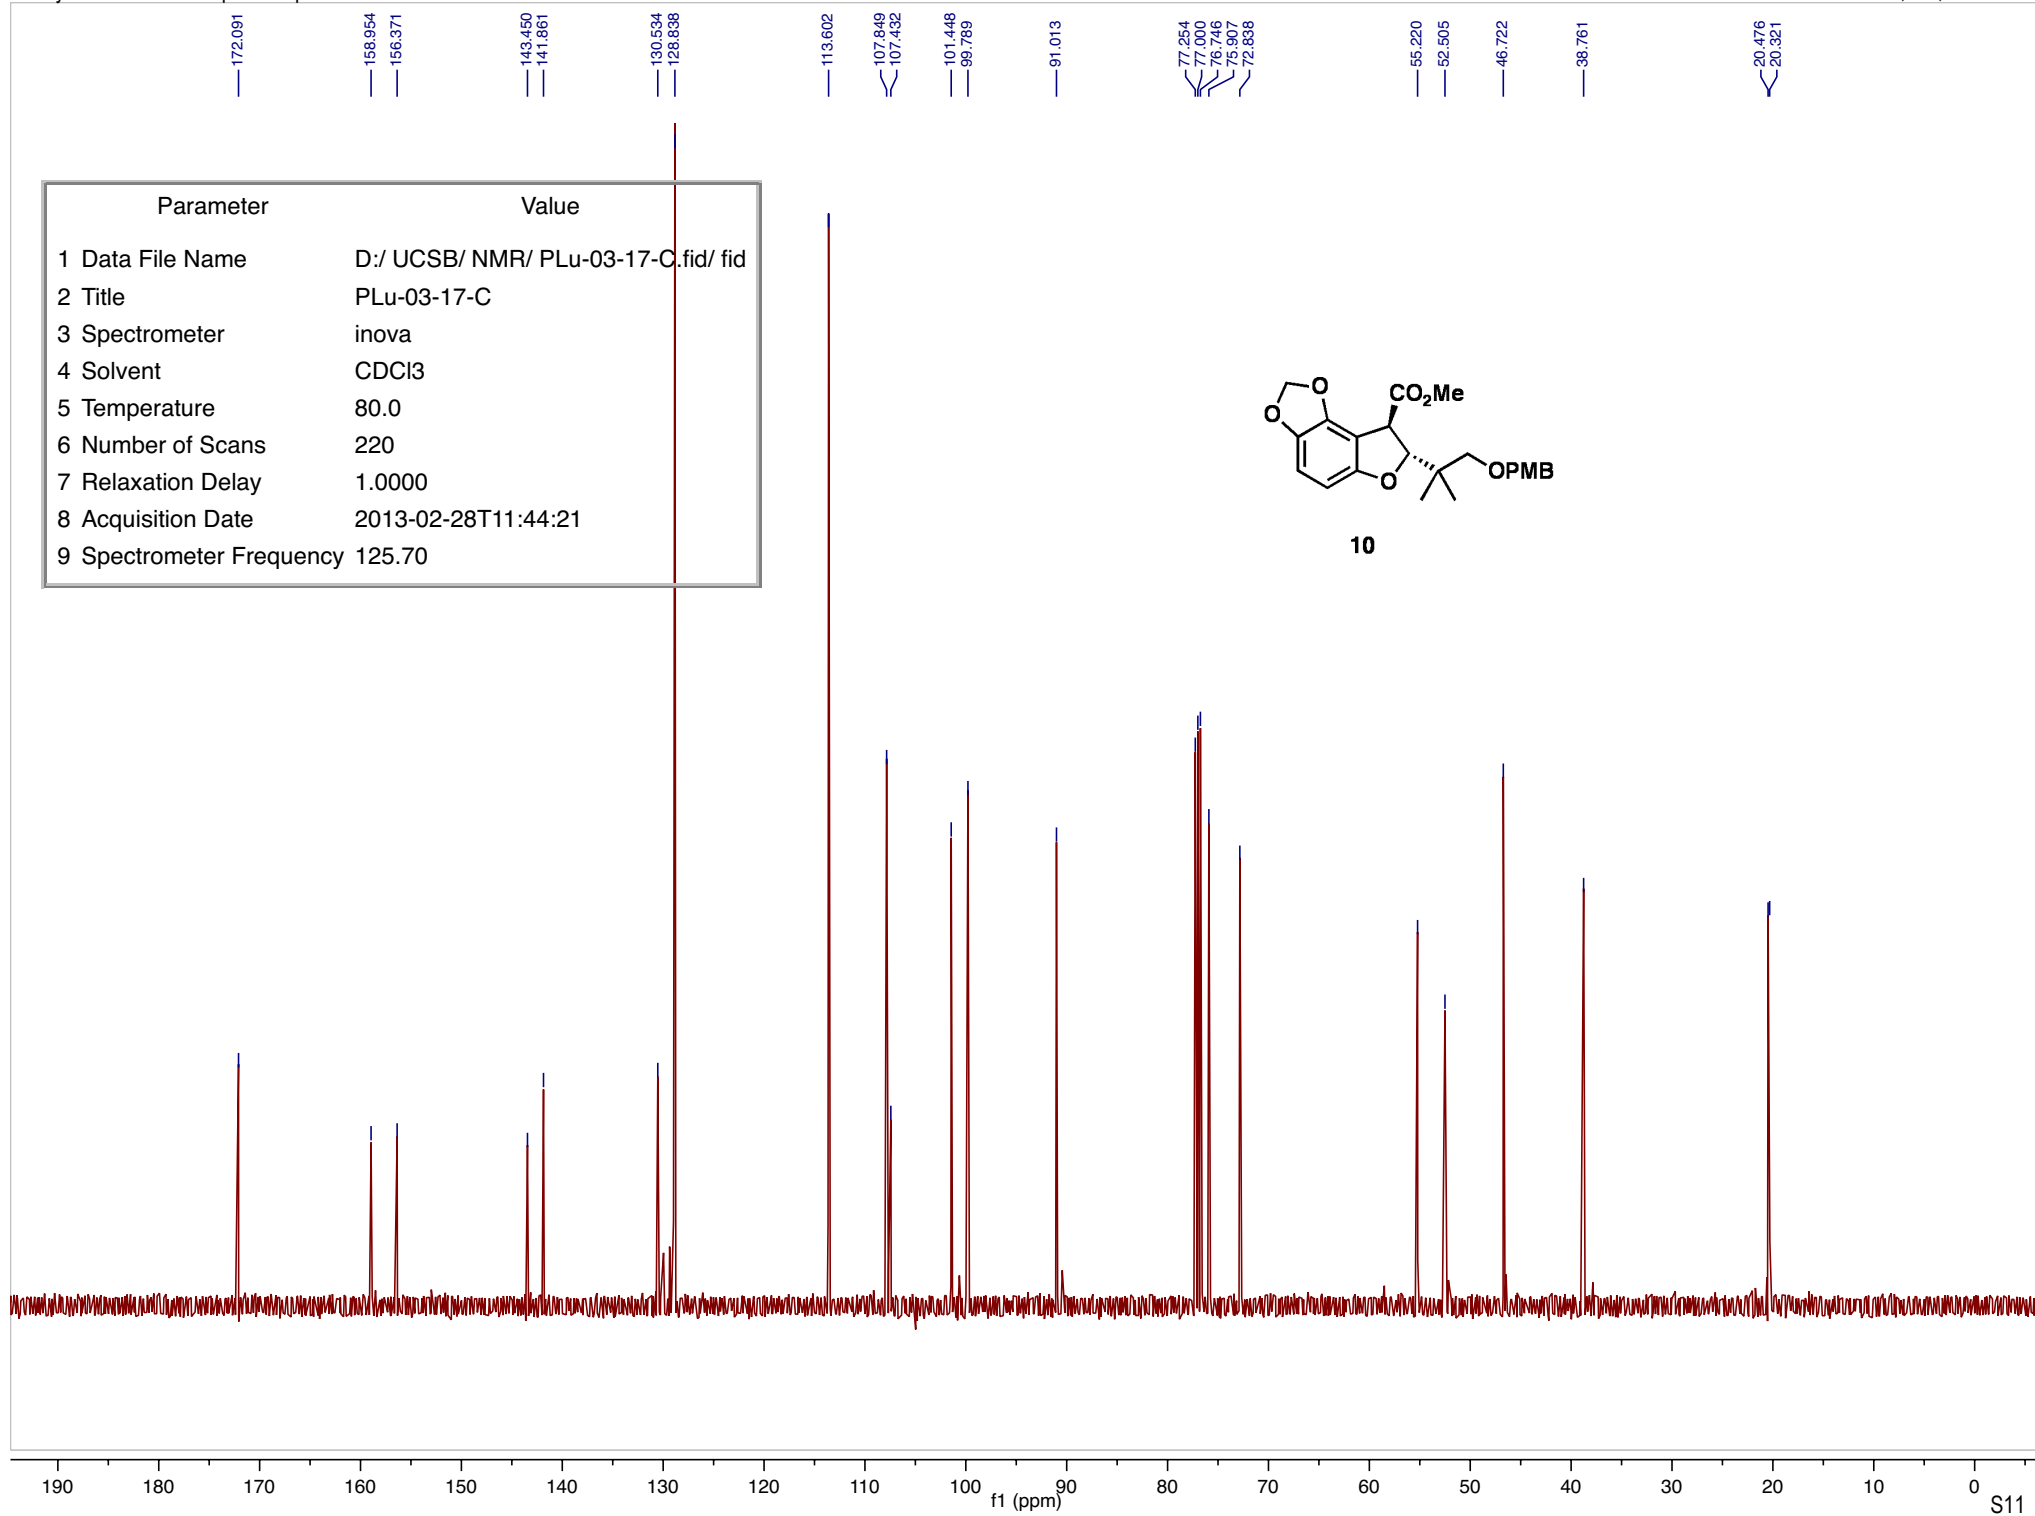

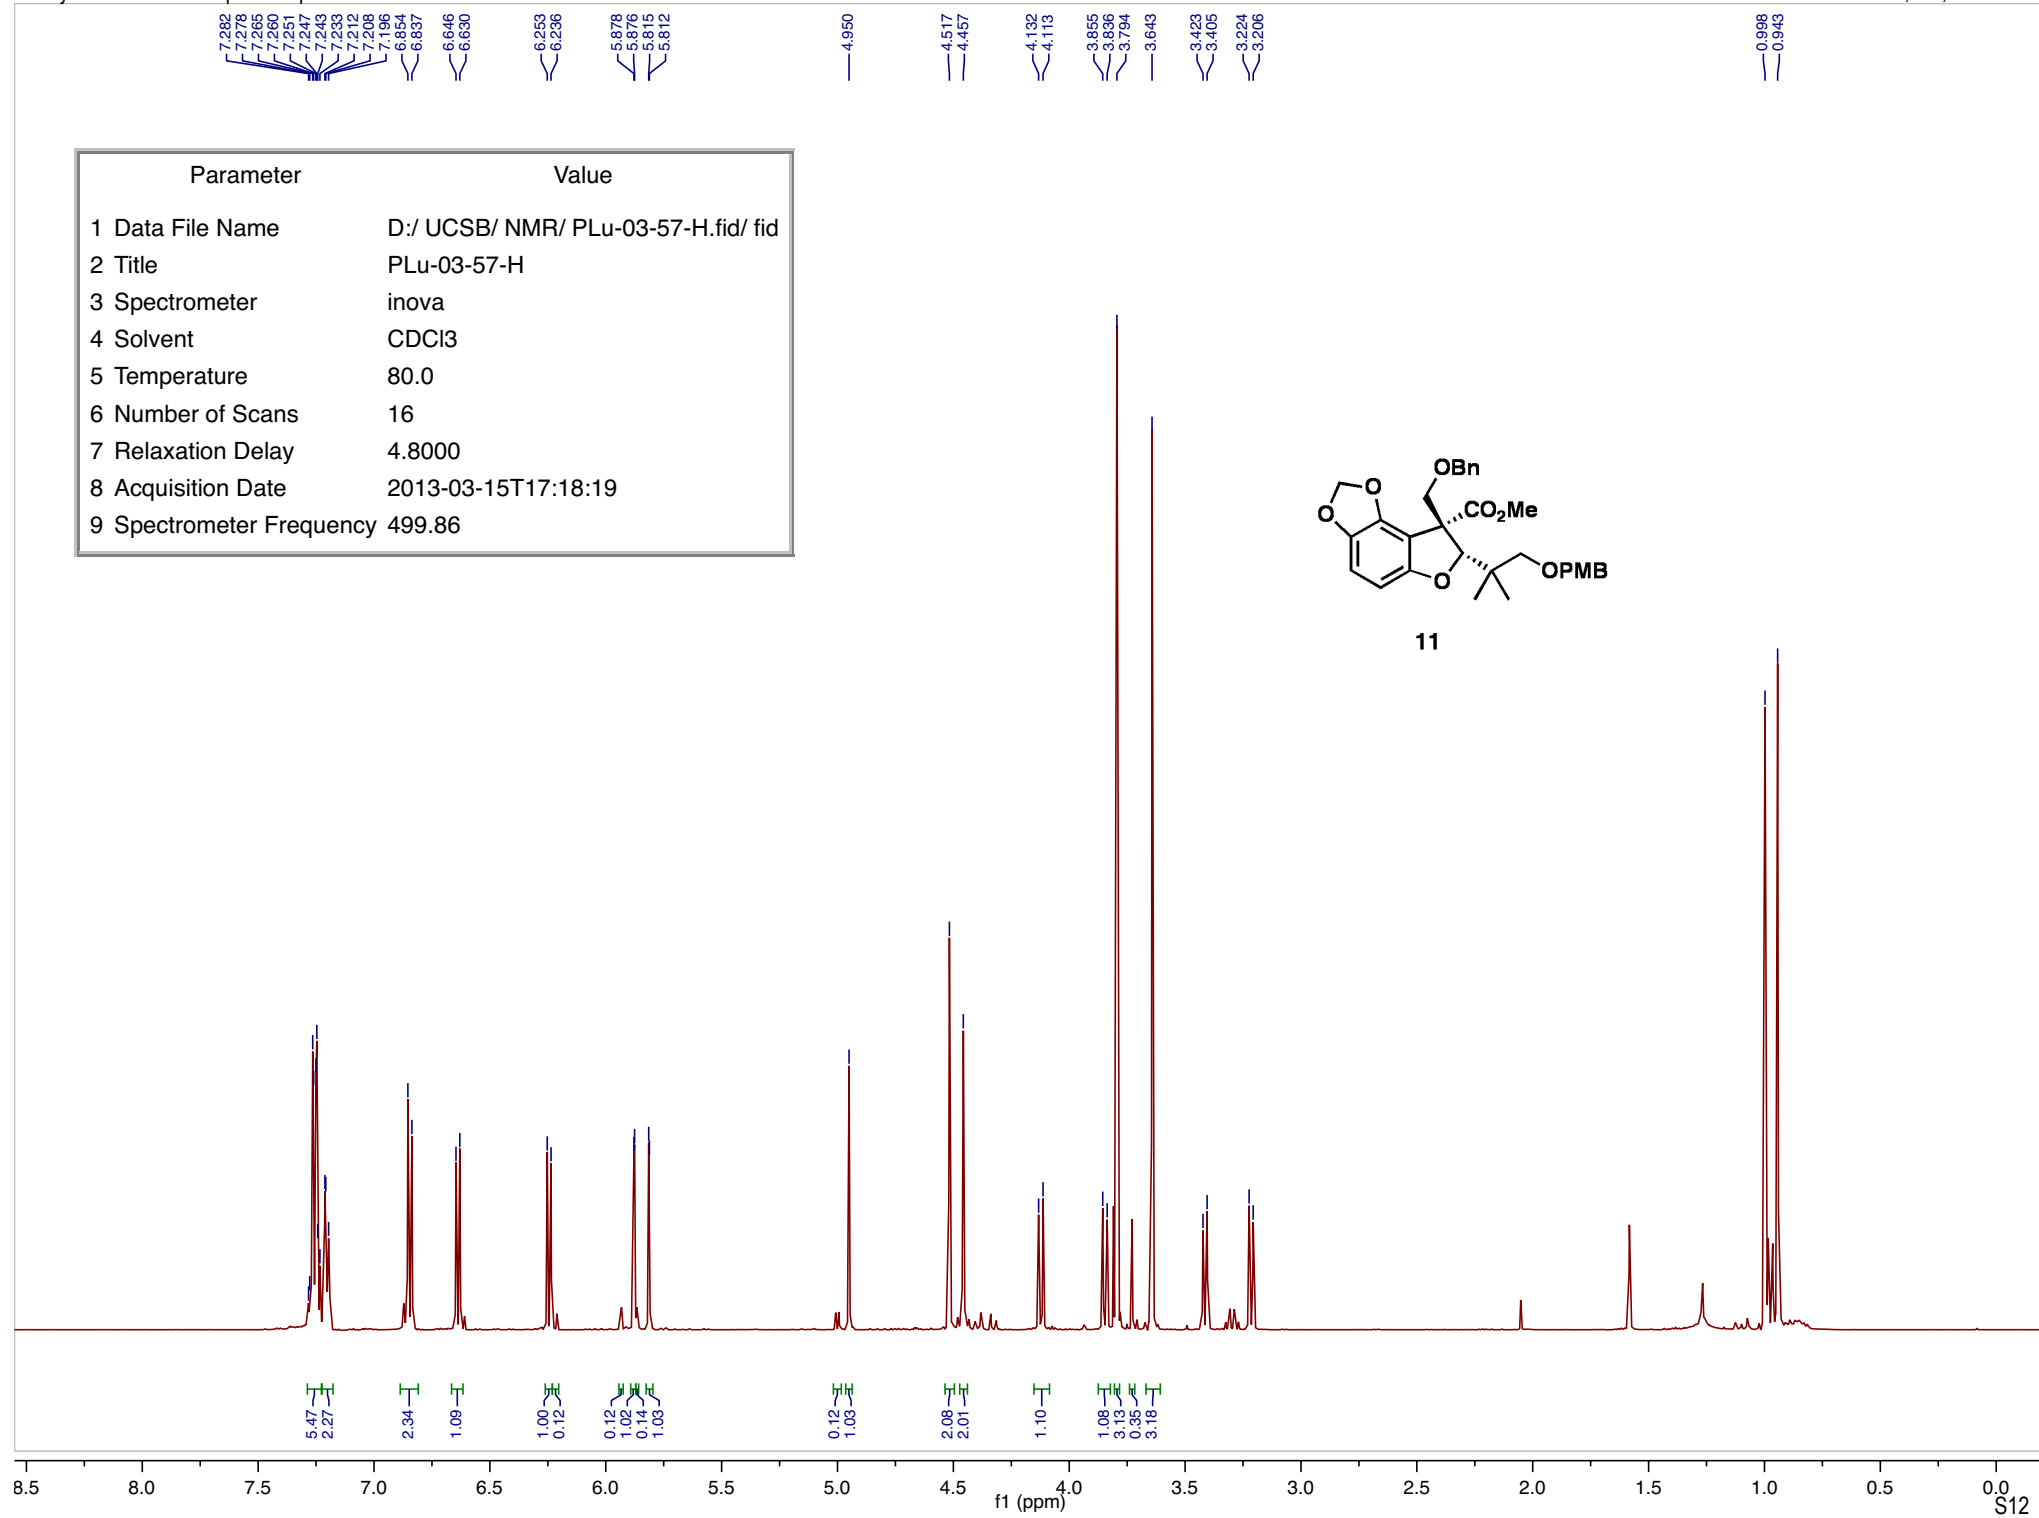

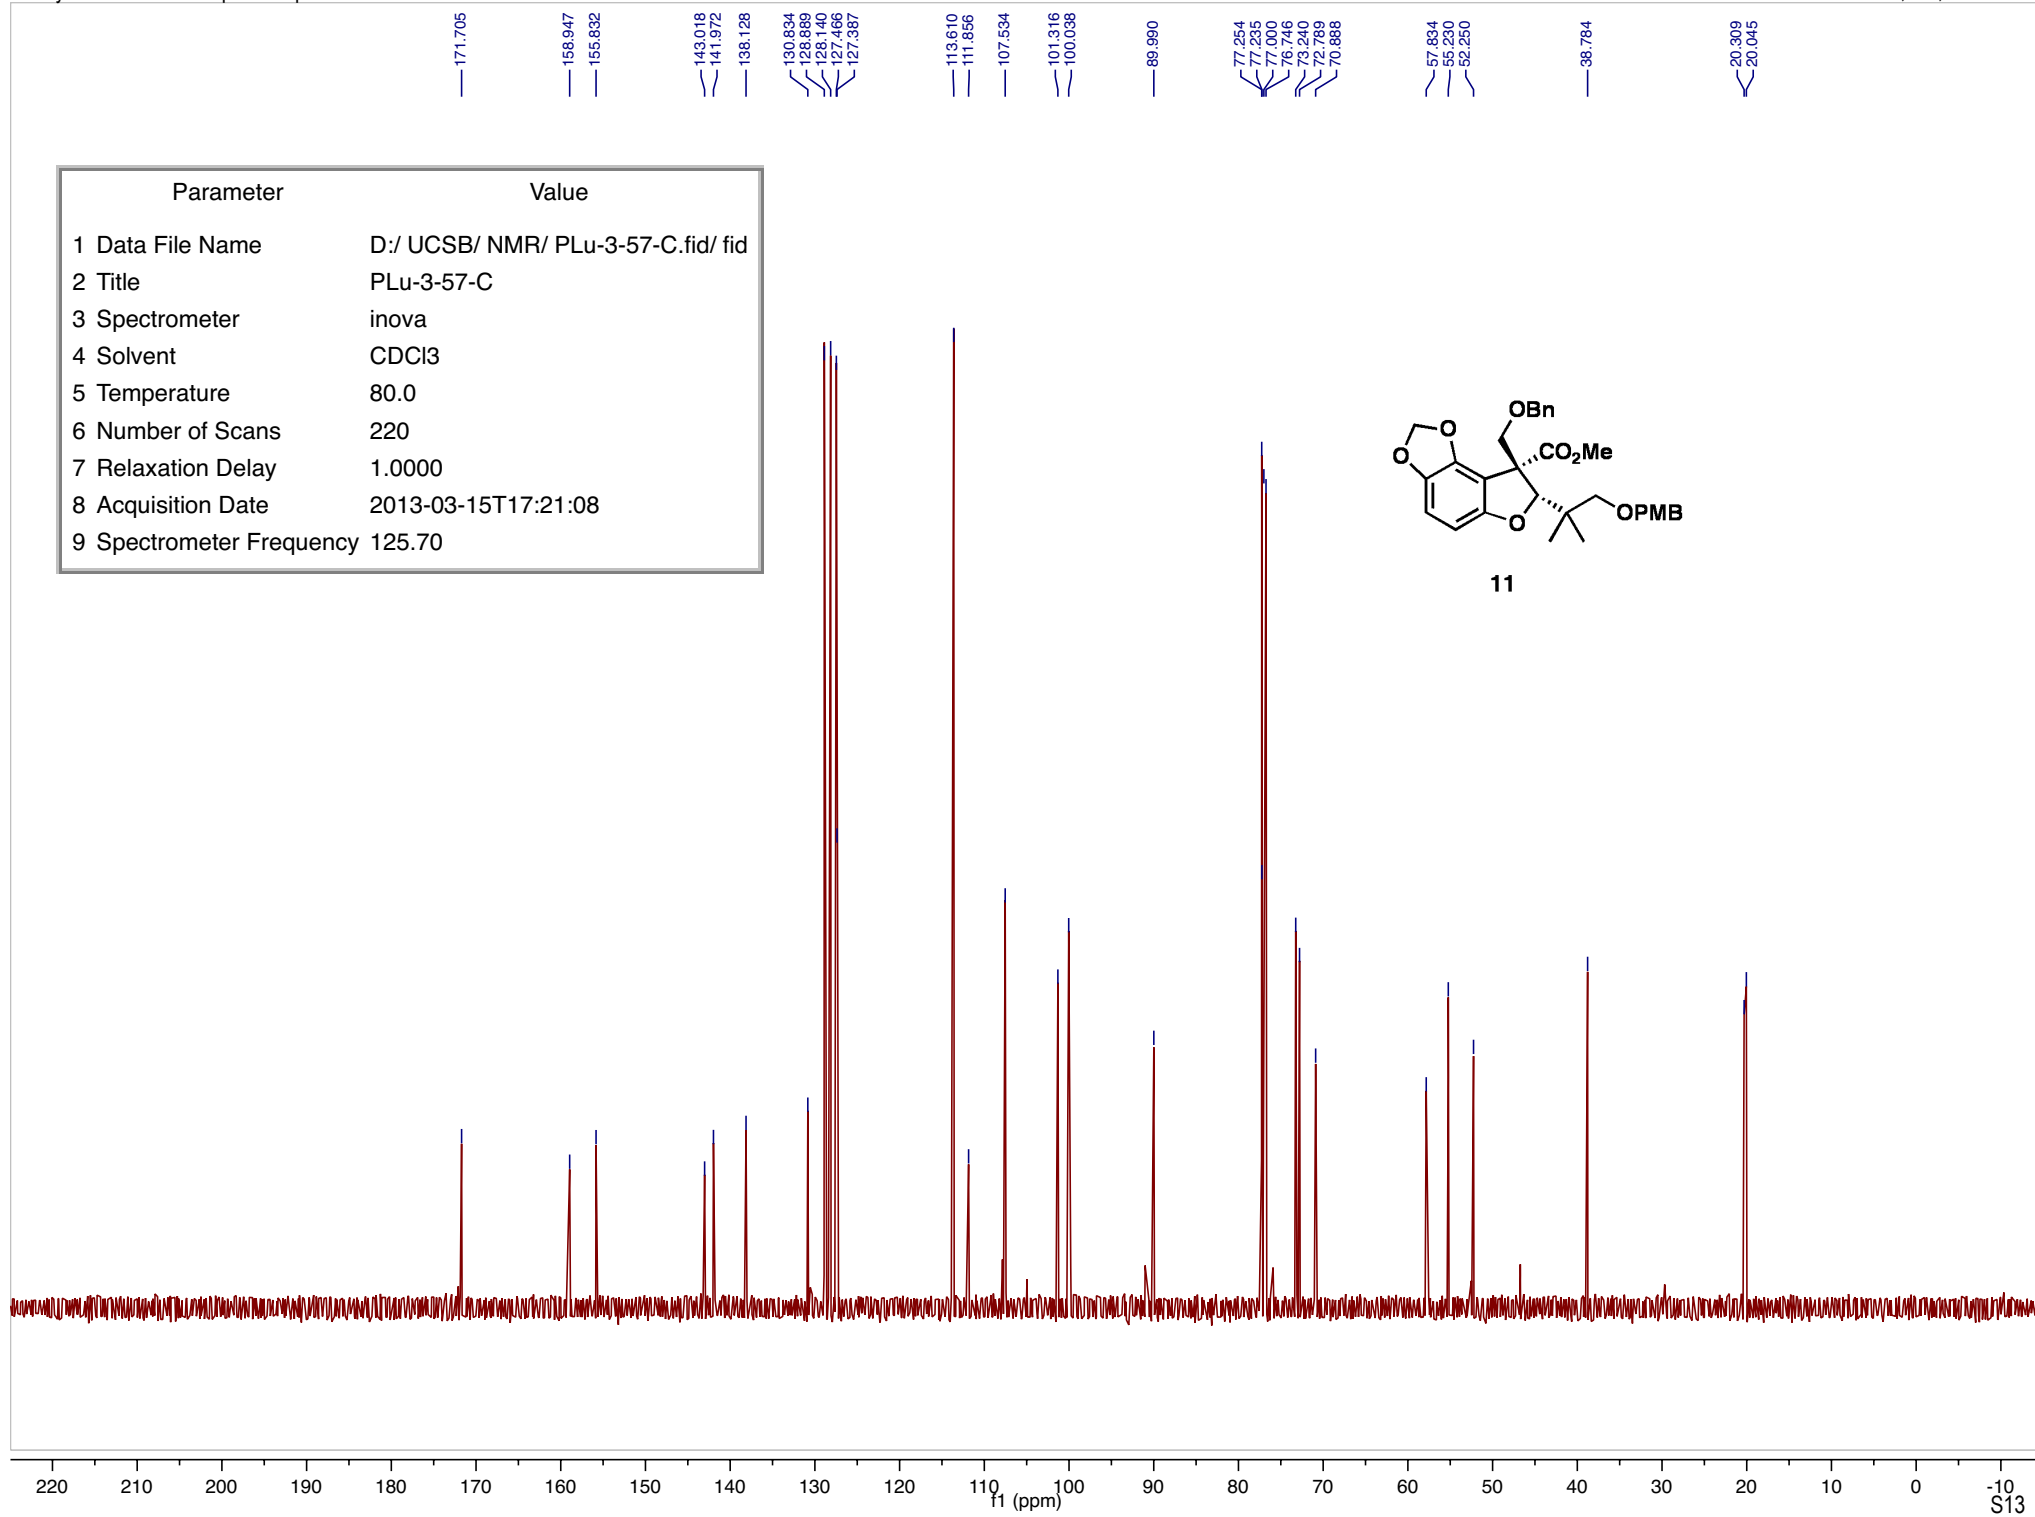

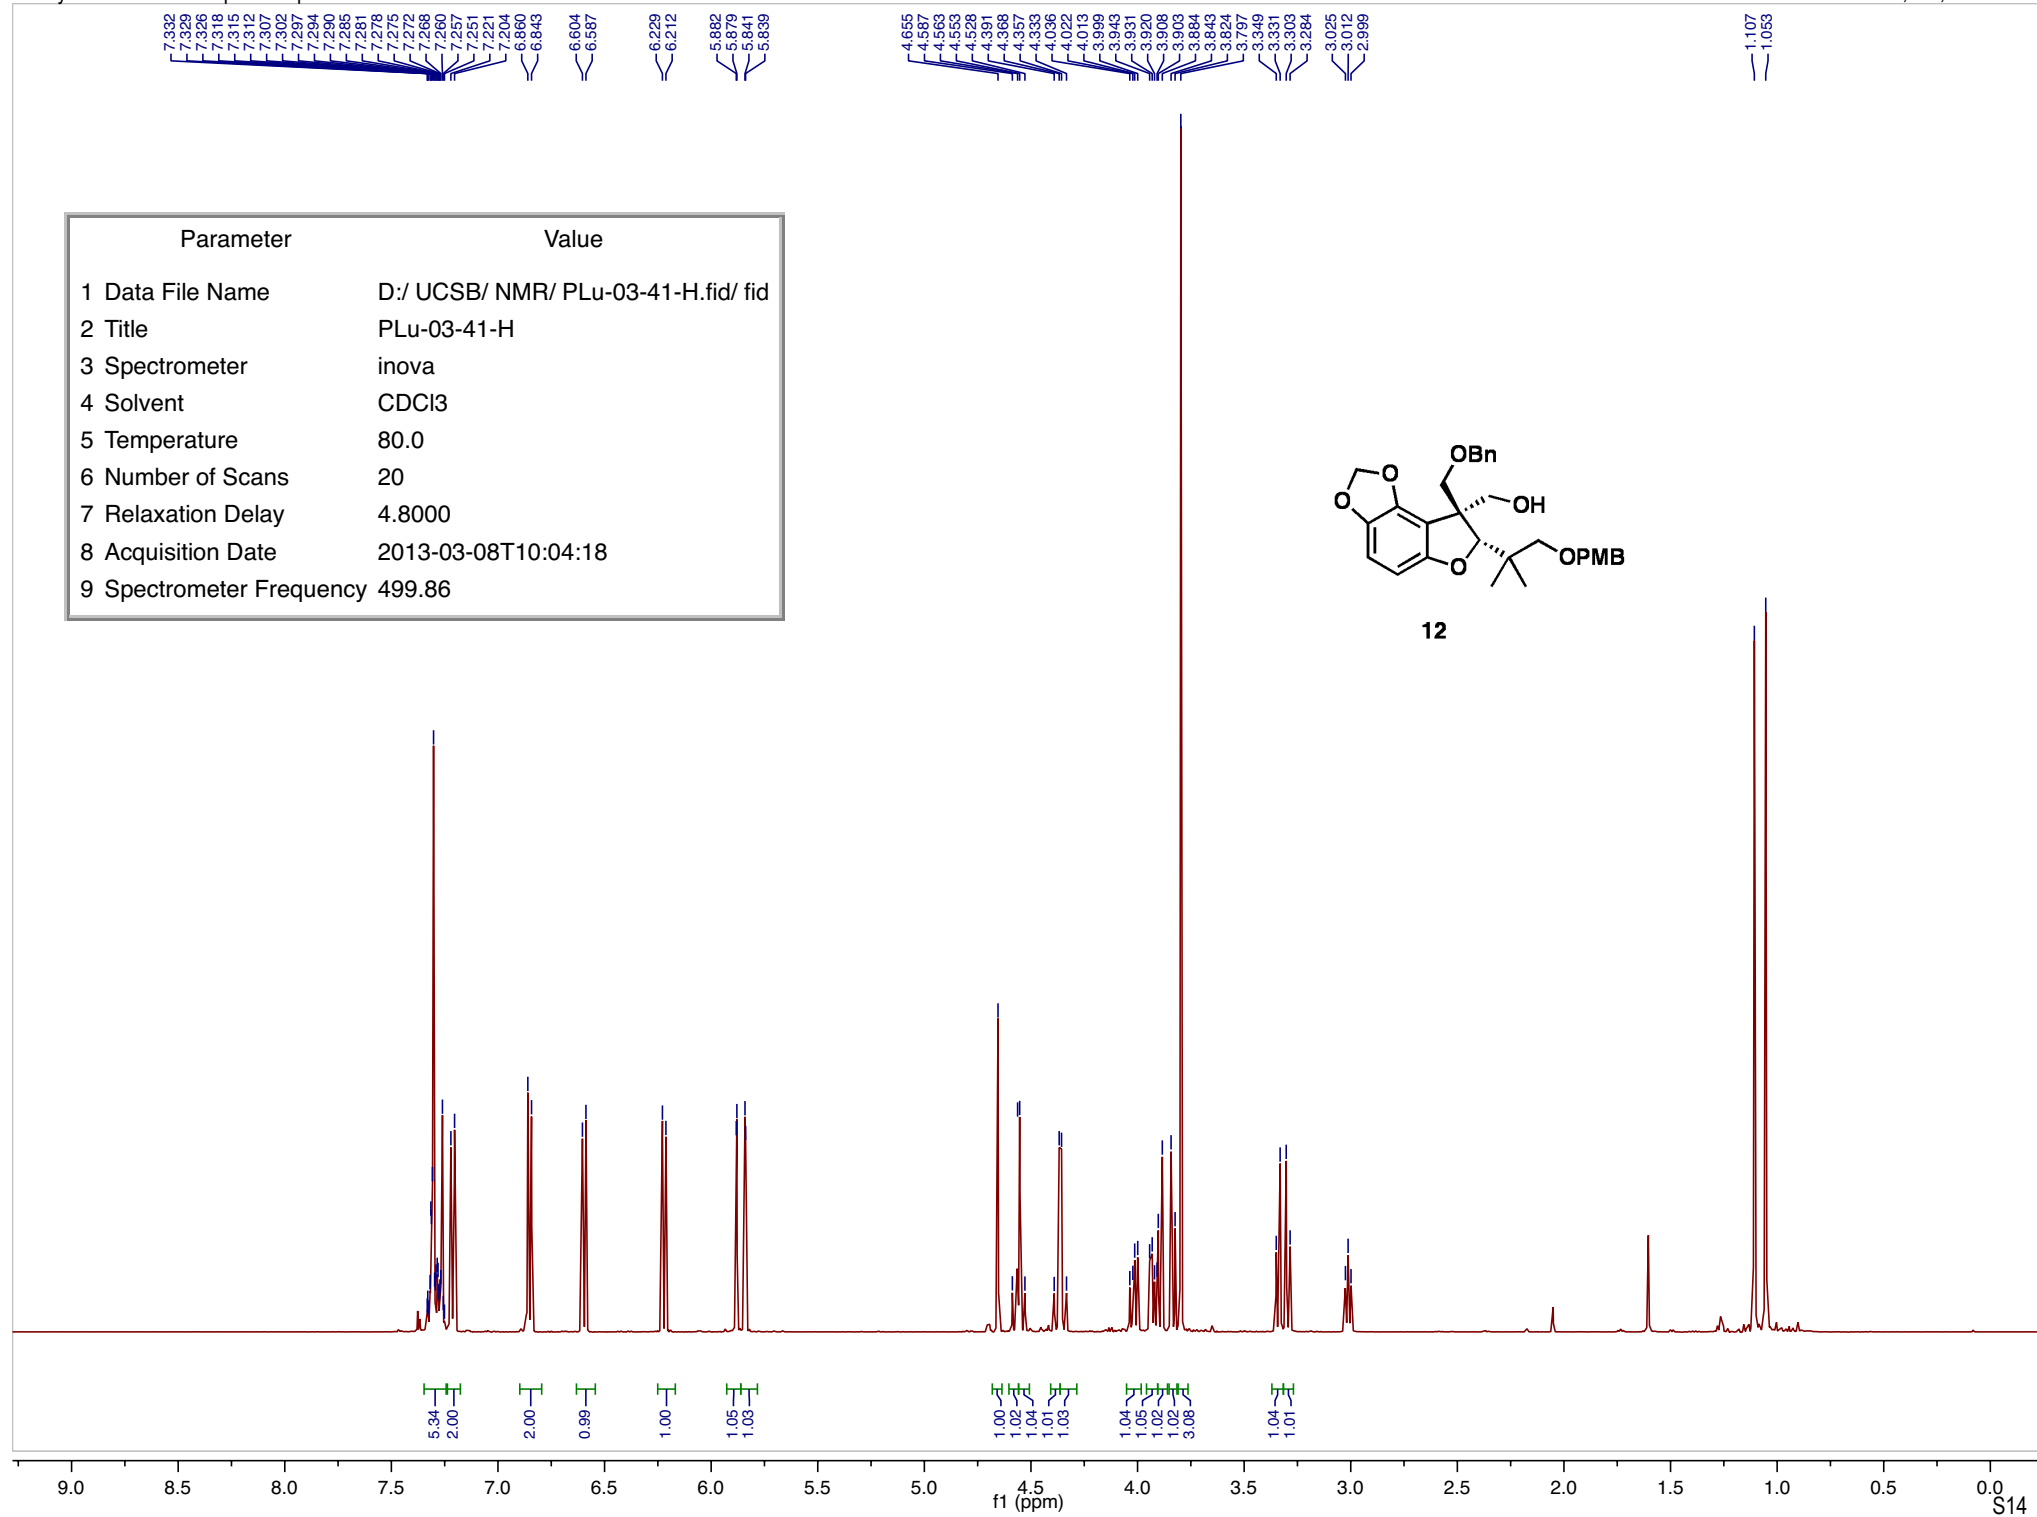

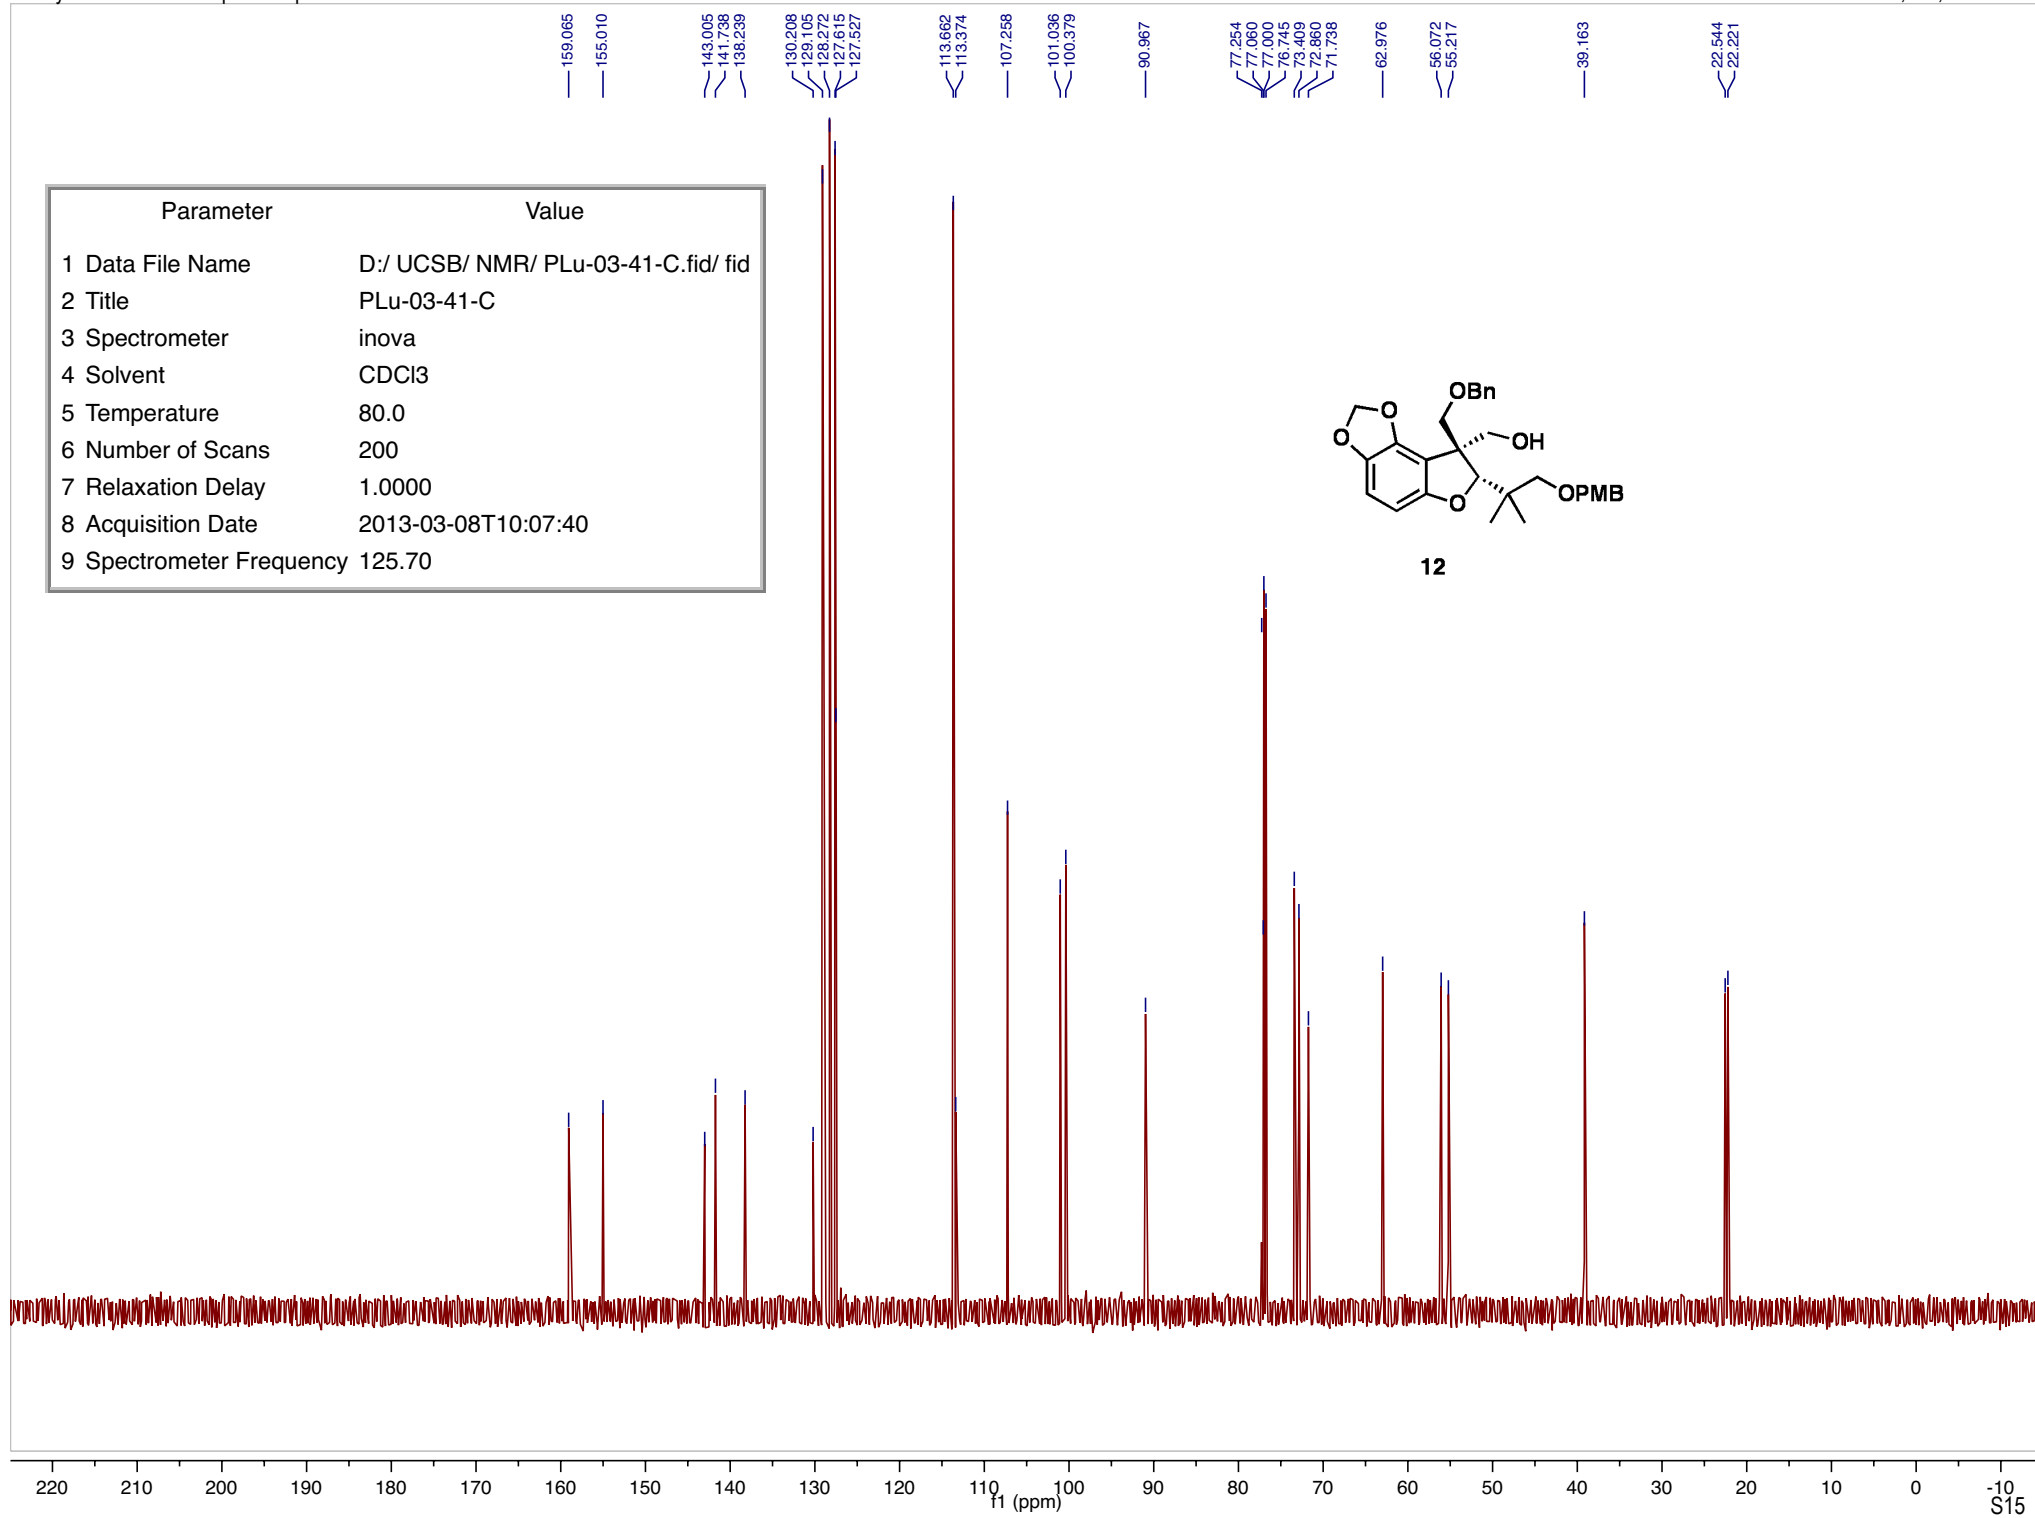

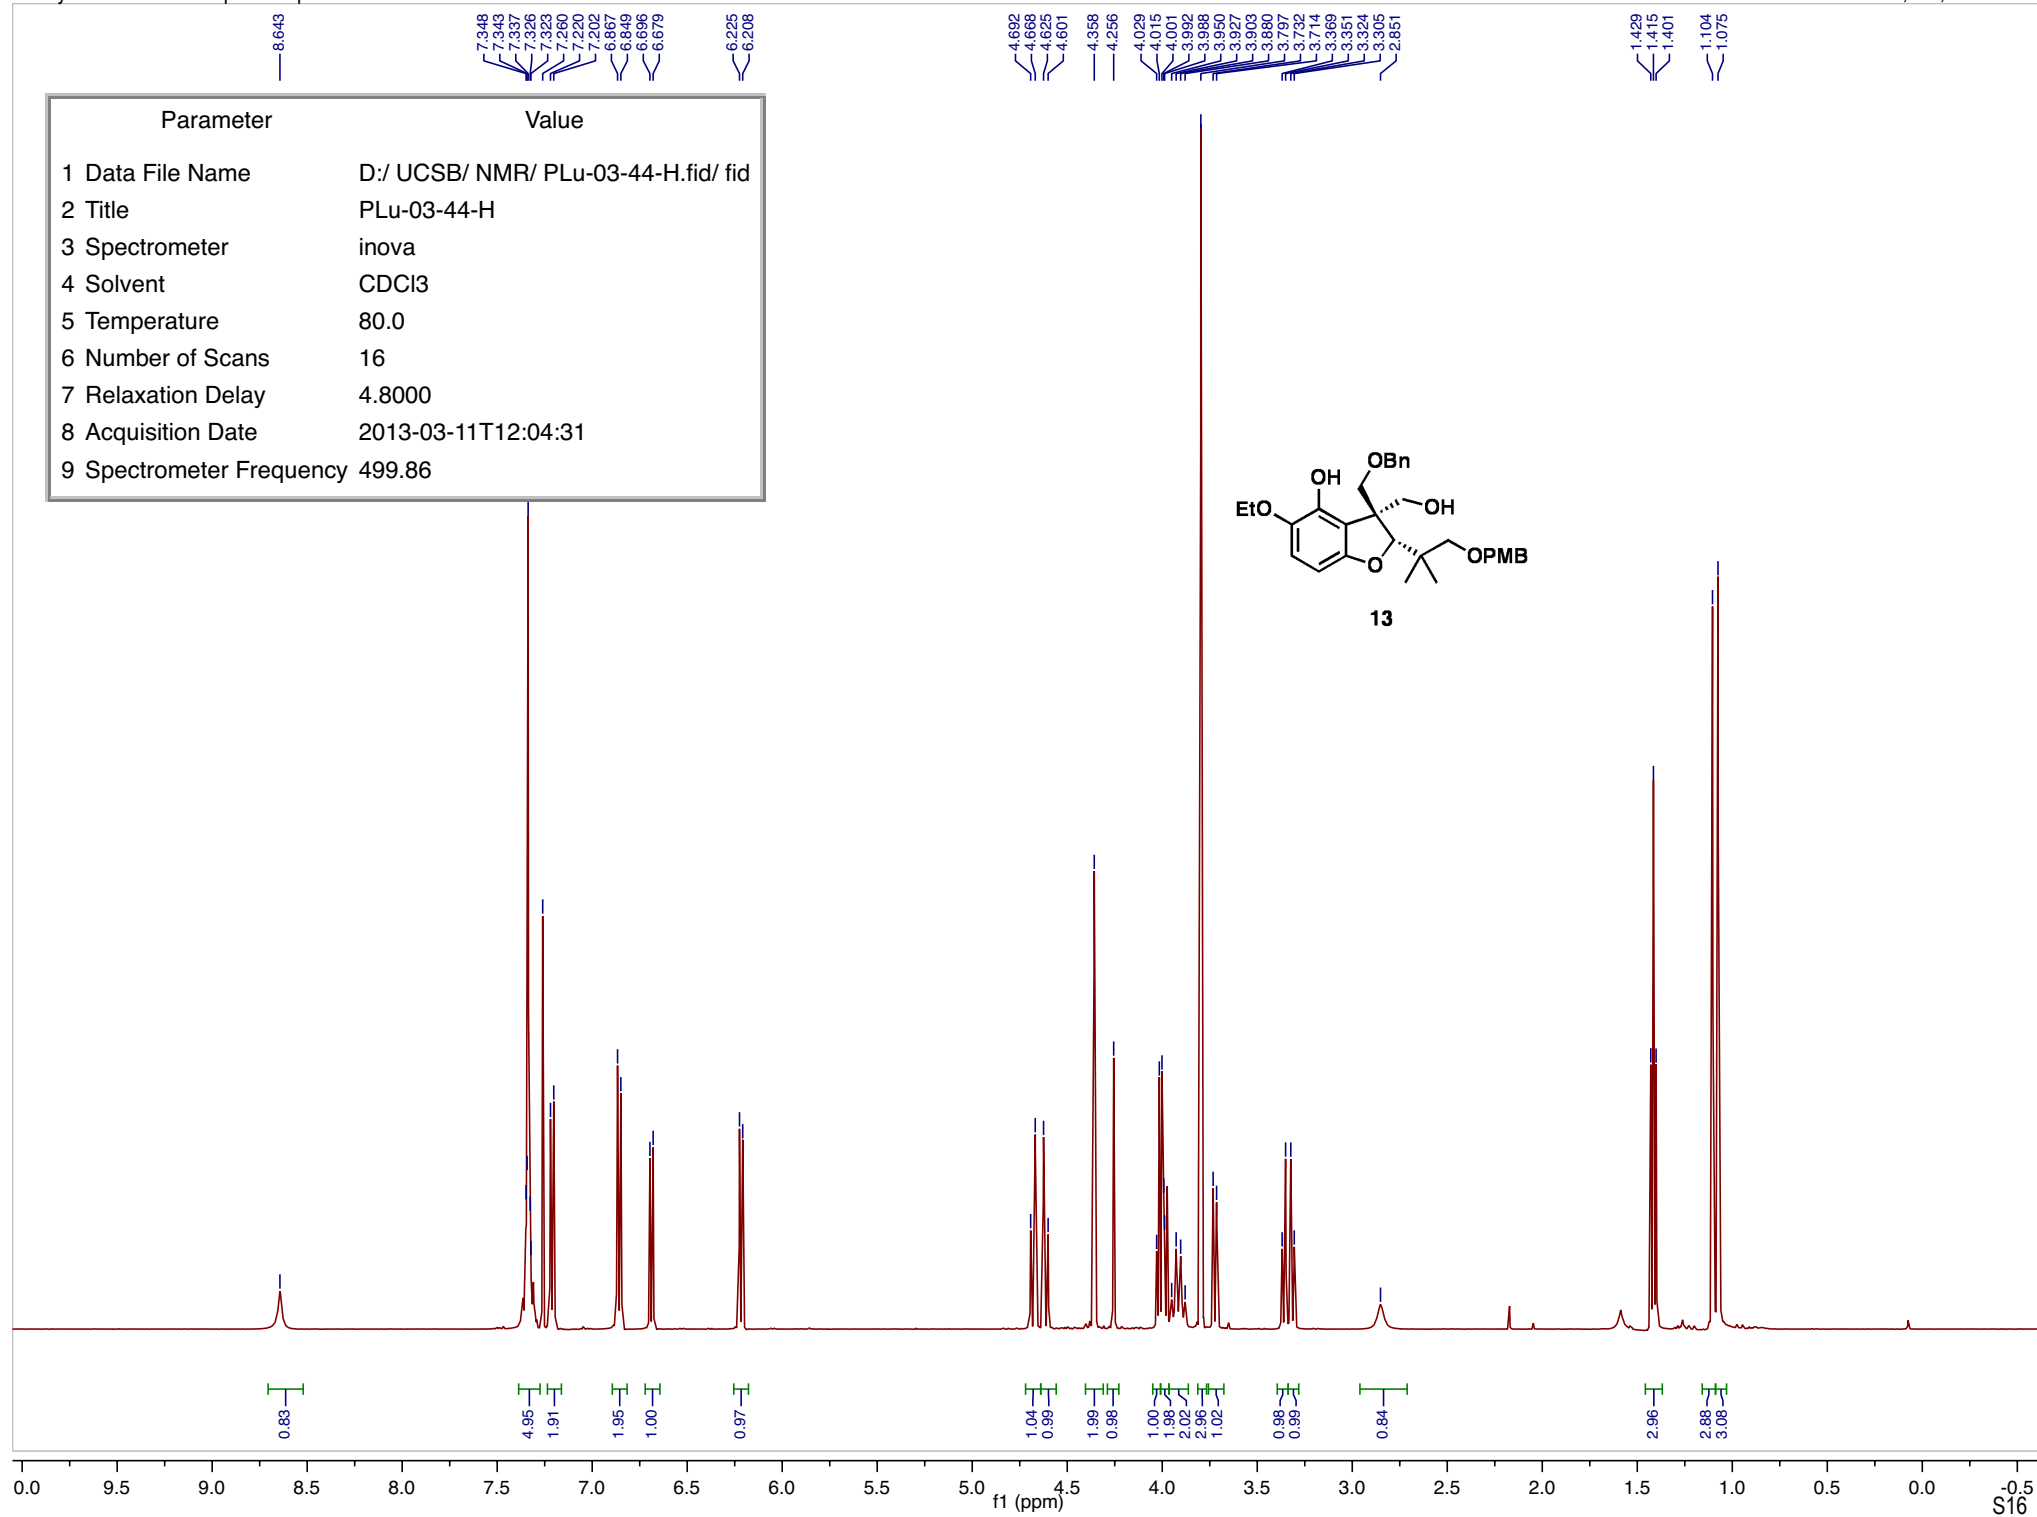



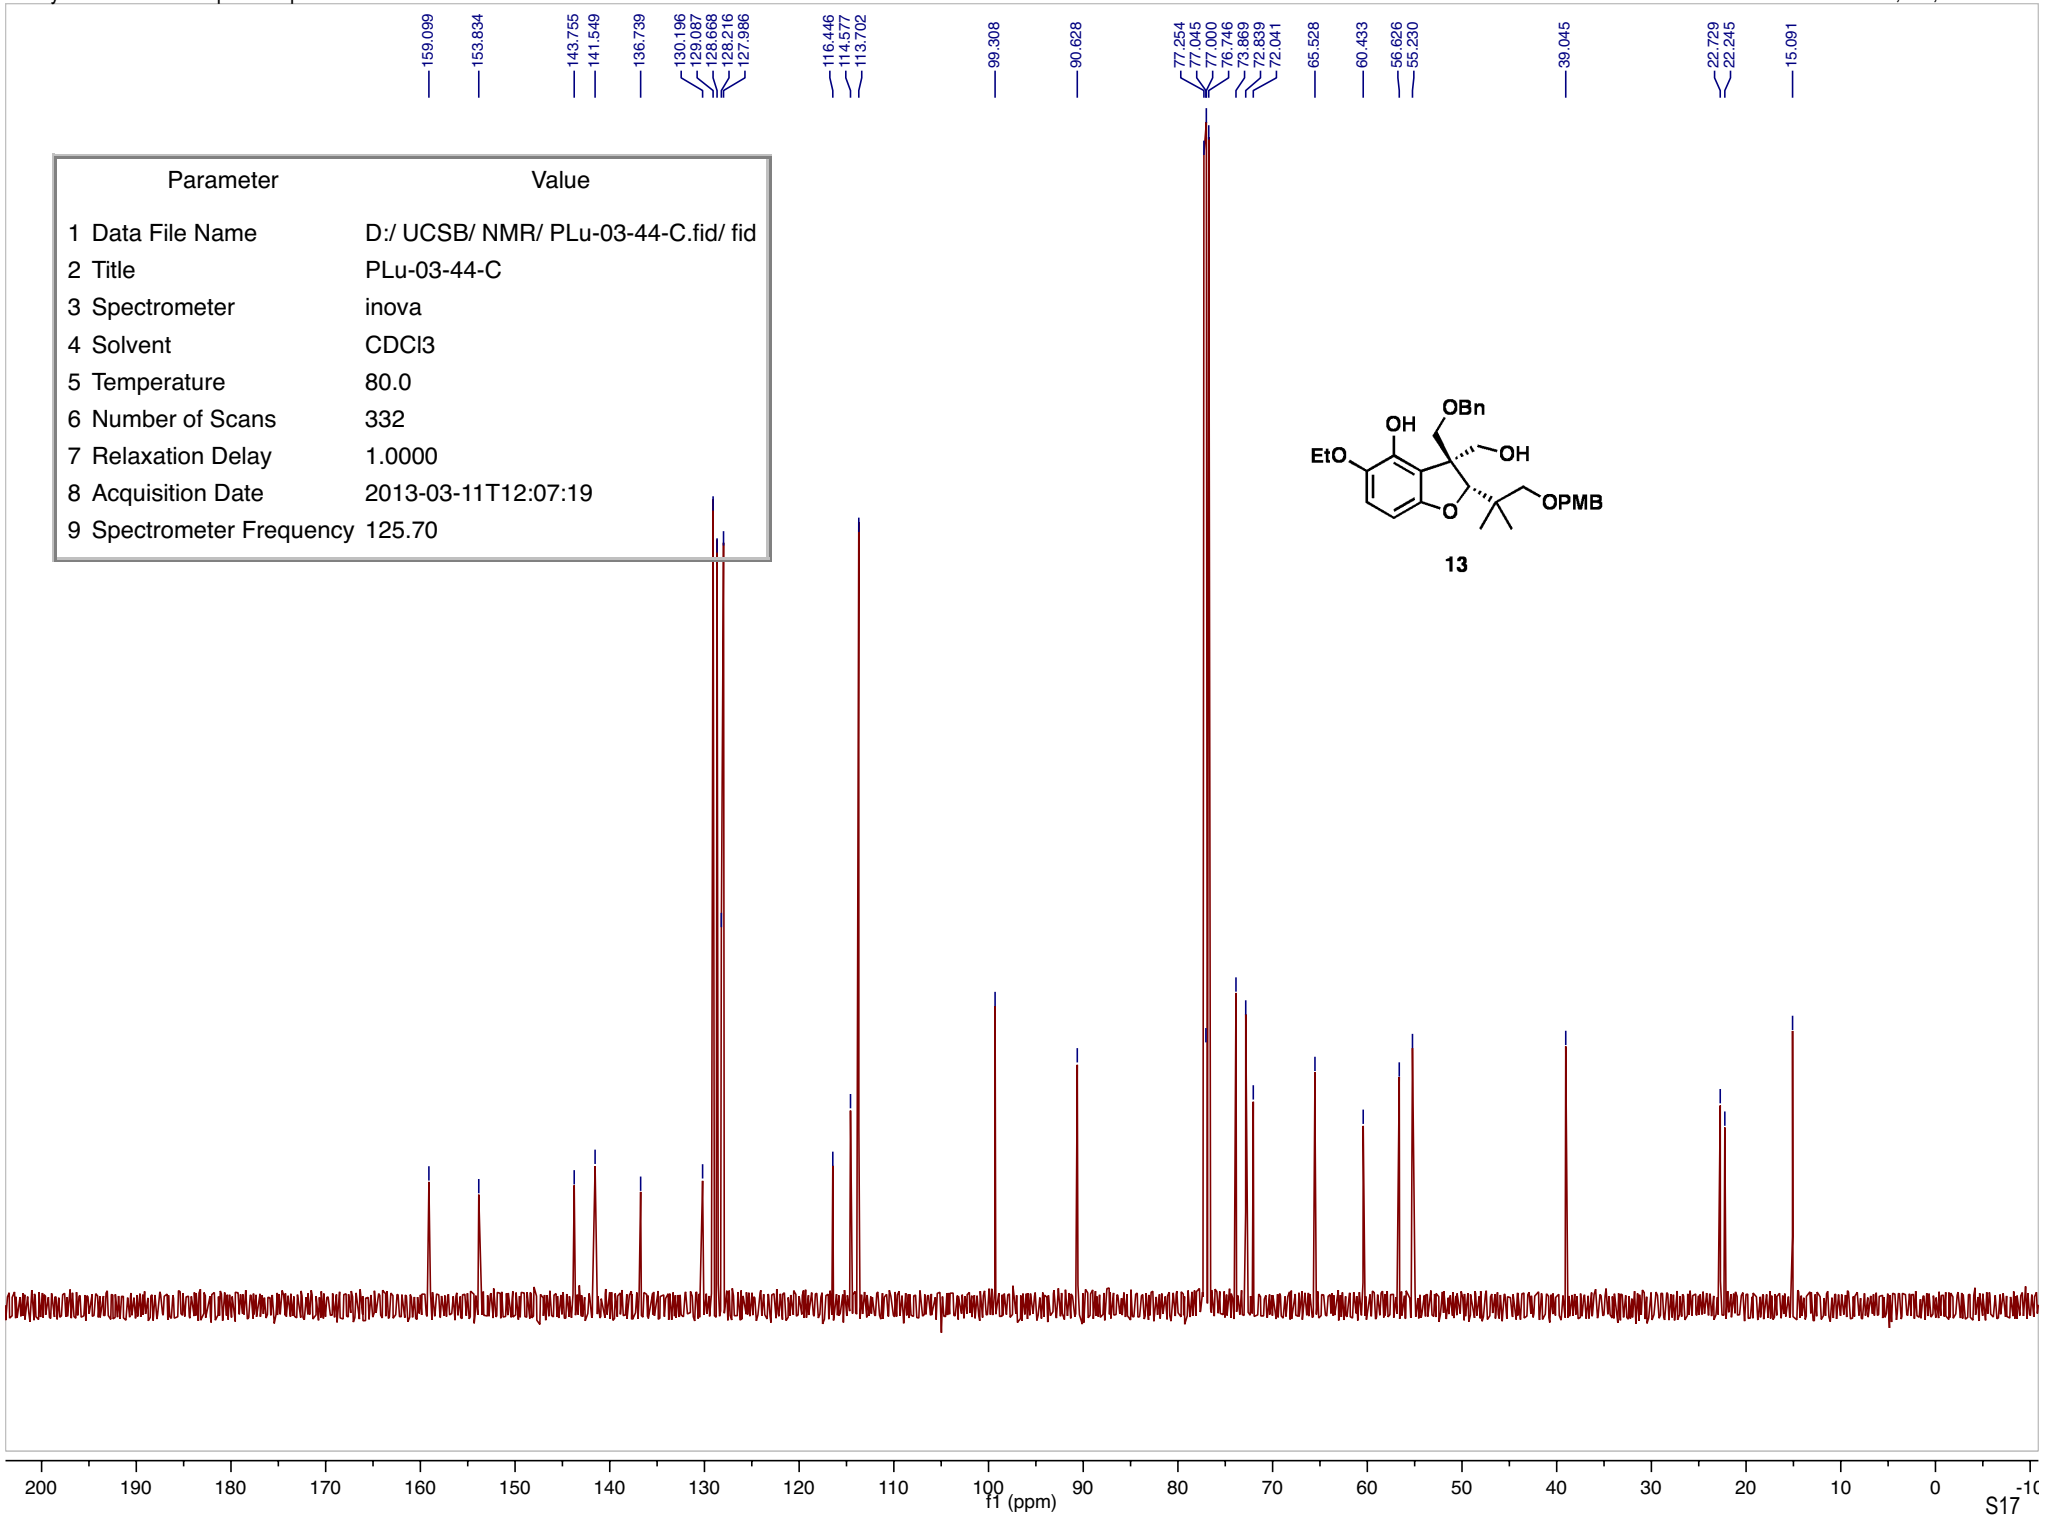

| Parameter                | Value                                |
|--------------------------|--------------------------------------|
| 1 Data File Name         | D:/ UCSB/ NMR/ P Lu-03-50-H.fid/ fid |
| 2 Title                  | PLu-03-50-H                          |
| 3 Spectrometer           | inova                                |
| 4 Solvent                | CDCl <sub>3</sub>                    |
| 5 Temperature            | 80.0                                 |
| 6 Number of Scans        | 16                                   |
| 7 Relaxation Delay       | 4.8000                               |
| 8 Acquisition Date       | 2013-03-11T19:03:19                  |
| 9 Spectrometer Frequency | 499.86                               |

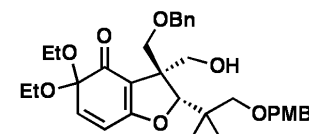

S1

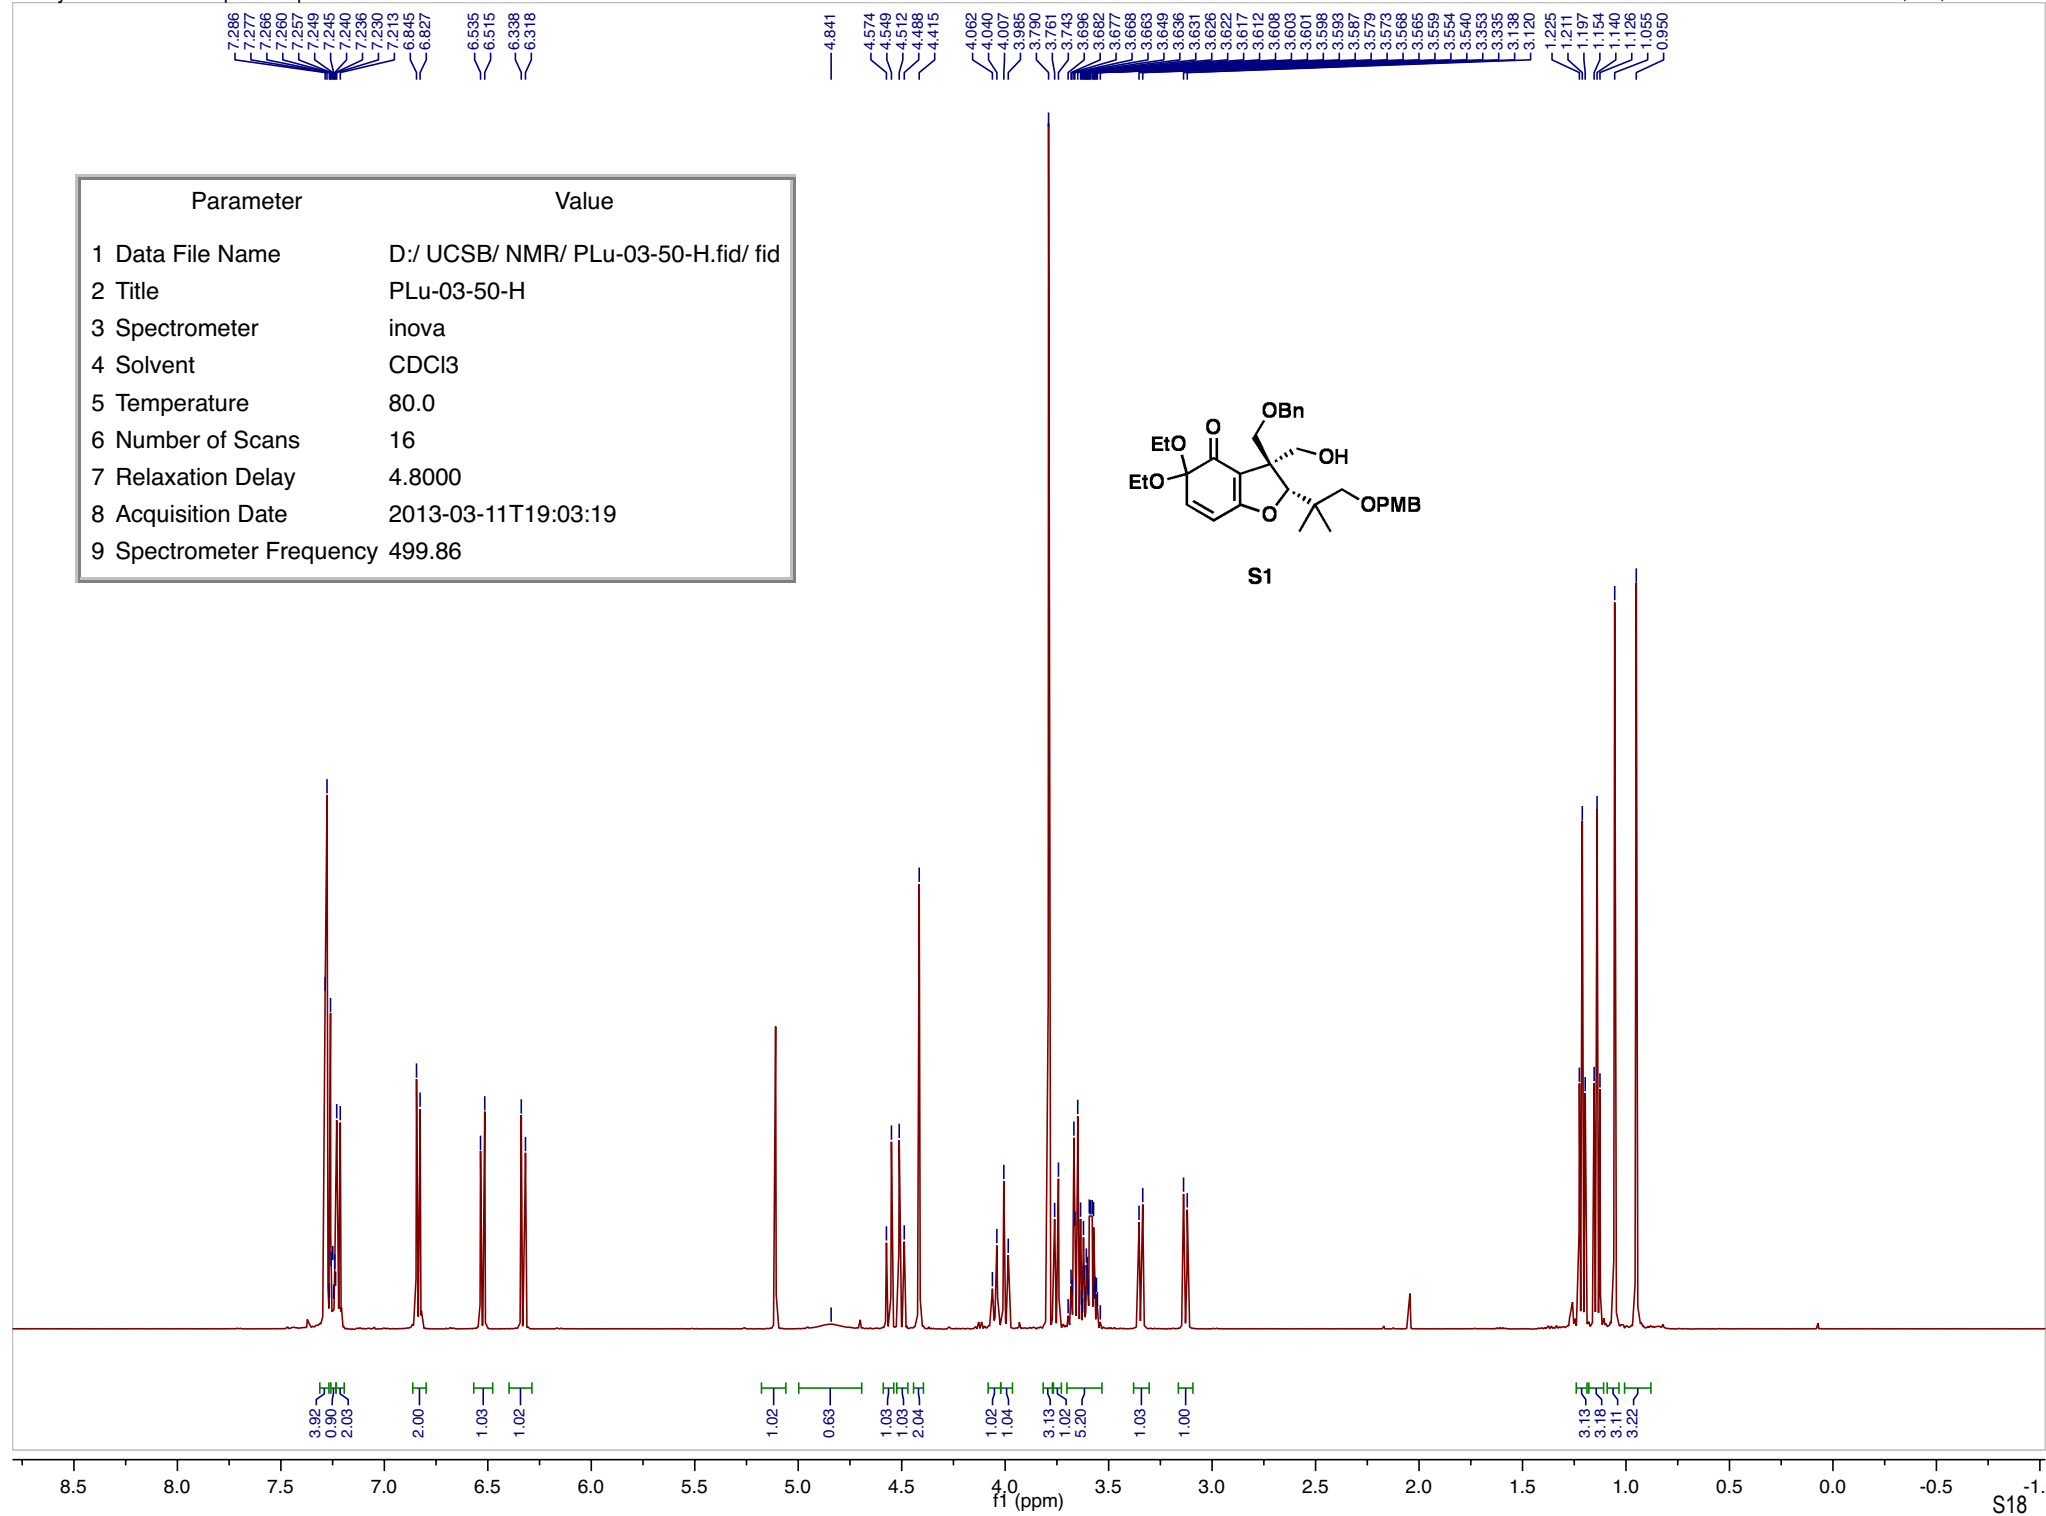

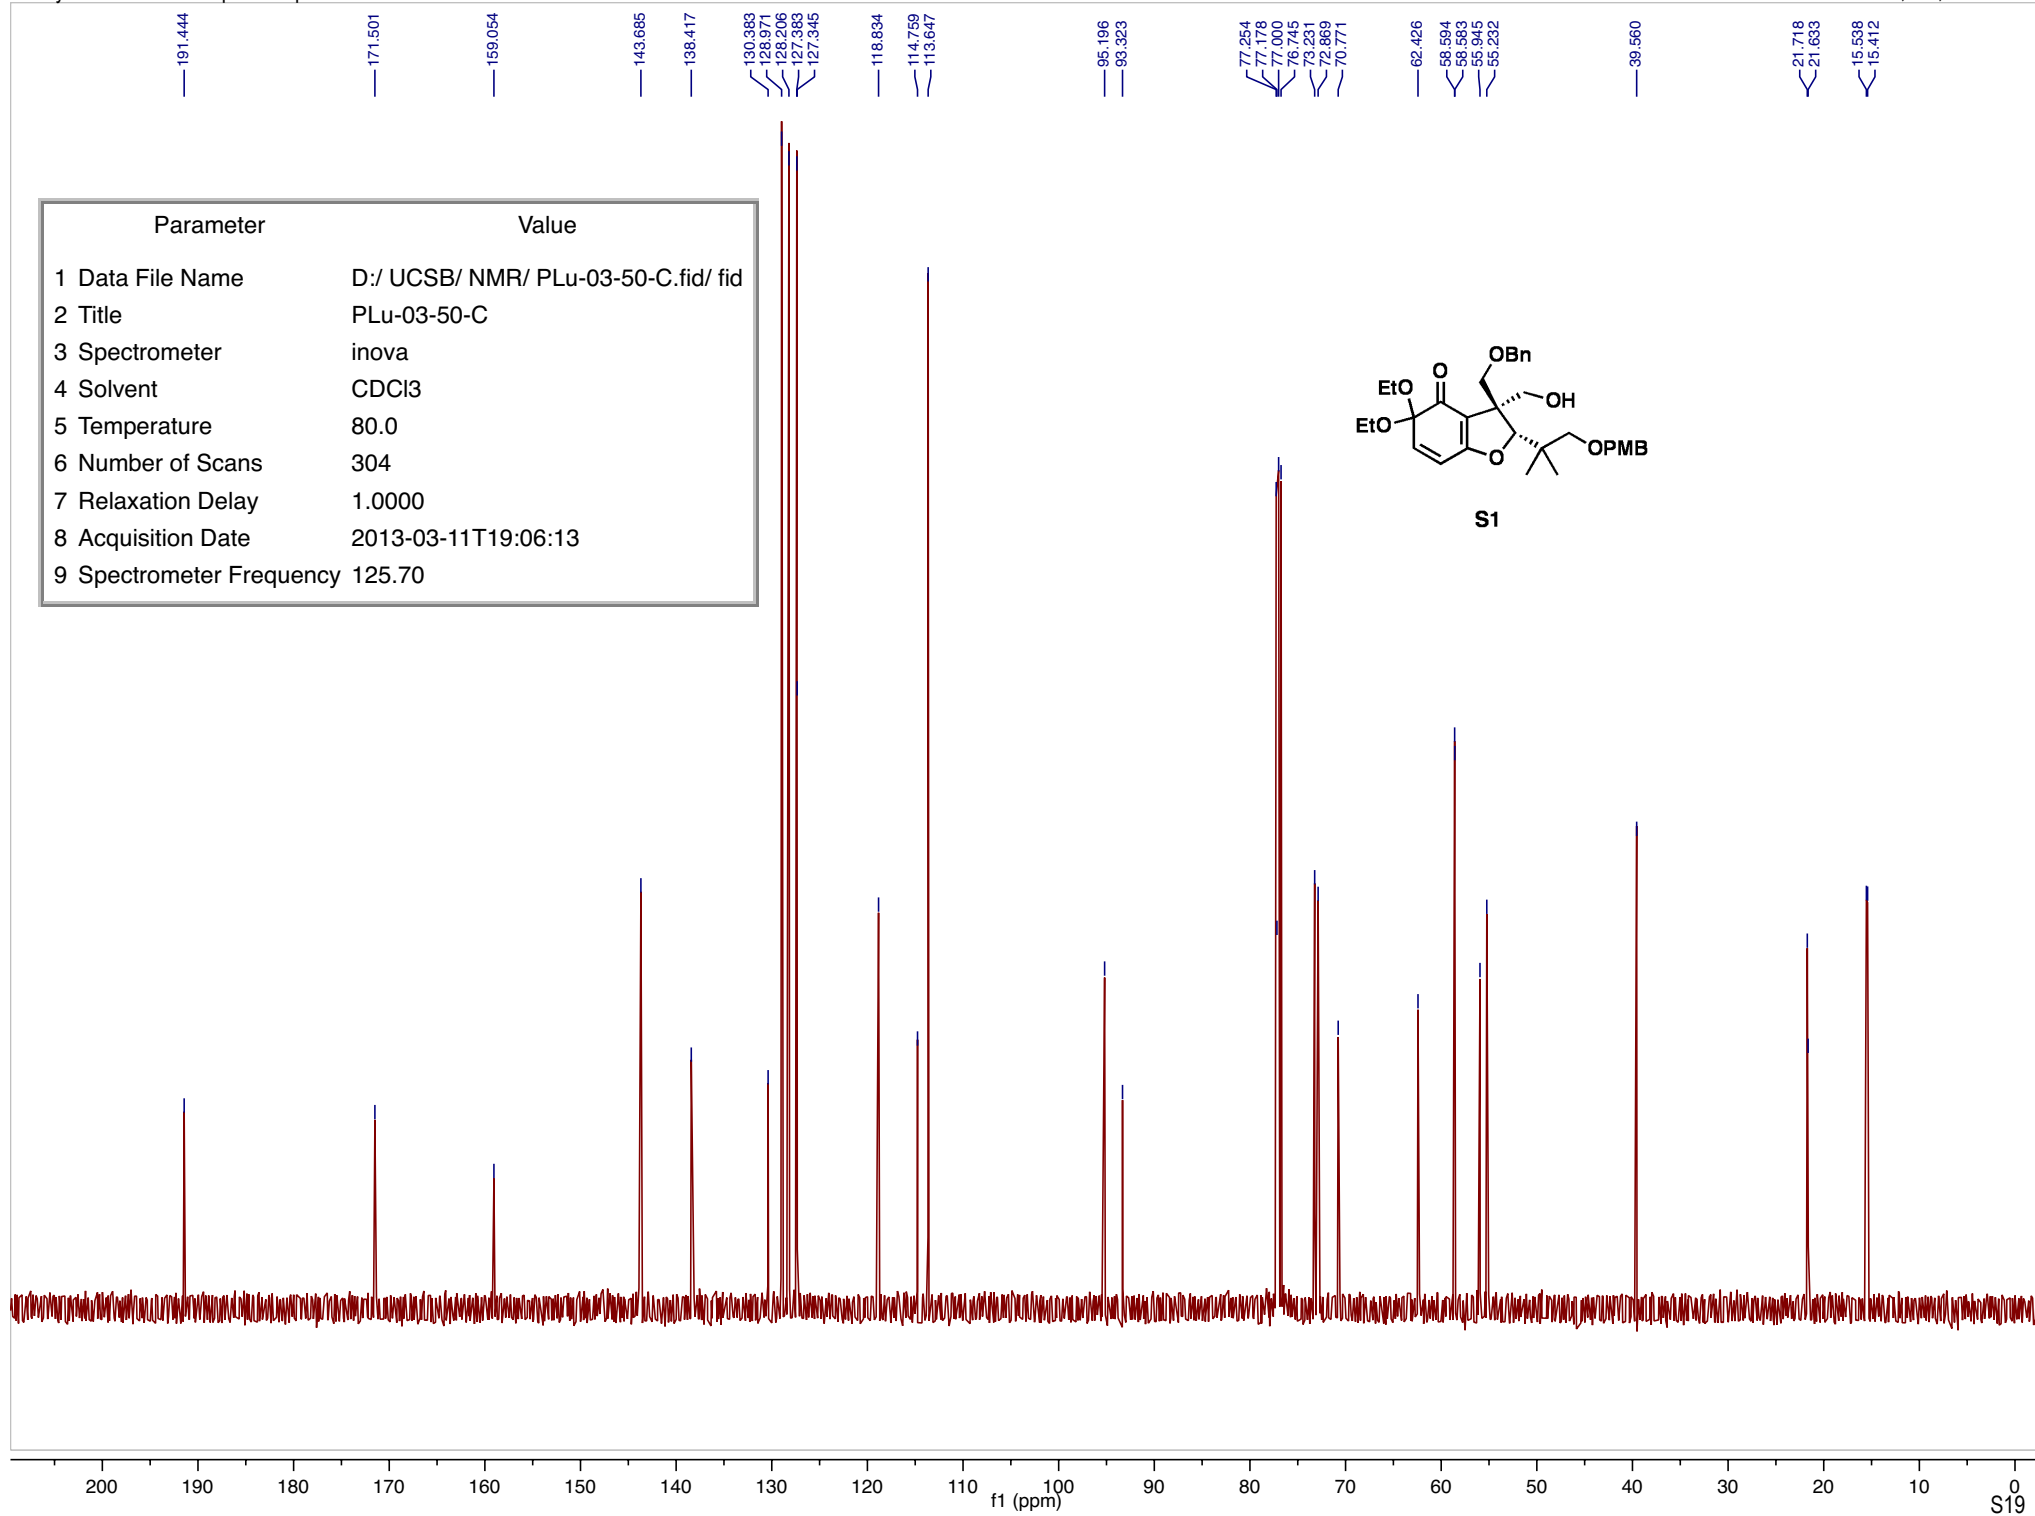

| Parameter                | Value                               |
|--------------------------|-------------------------------------|
| 1 Data File Name         | D:/ UCSB/ NMR/ PLu-03-51-H.fid/ fid |
| 2 Title                  | PLu-03-51-H                         |
| 3 Spectrometer           | inova                               |
| 4 Solvent                | CDCl3                               |
| 5 Temperature            | 80.0                                |
| 6 Number of Scans        | 16                                  |
| 7 Relaxation Delay       | 4.8000                              |
| 8 Acquisition Date       | 2013-03-13T11:04:21                 |
| 9 Spectrometer Frequency | 499.86                              |

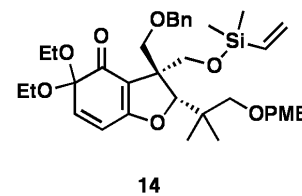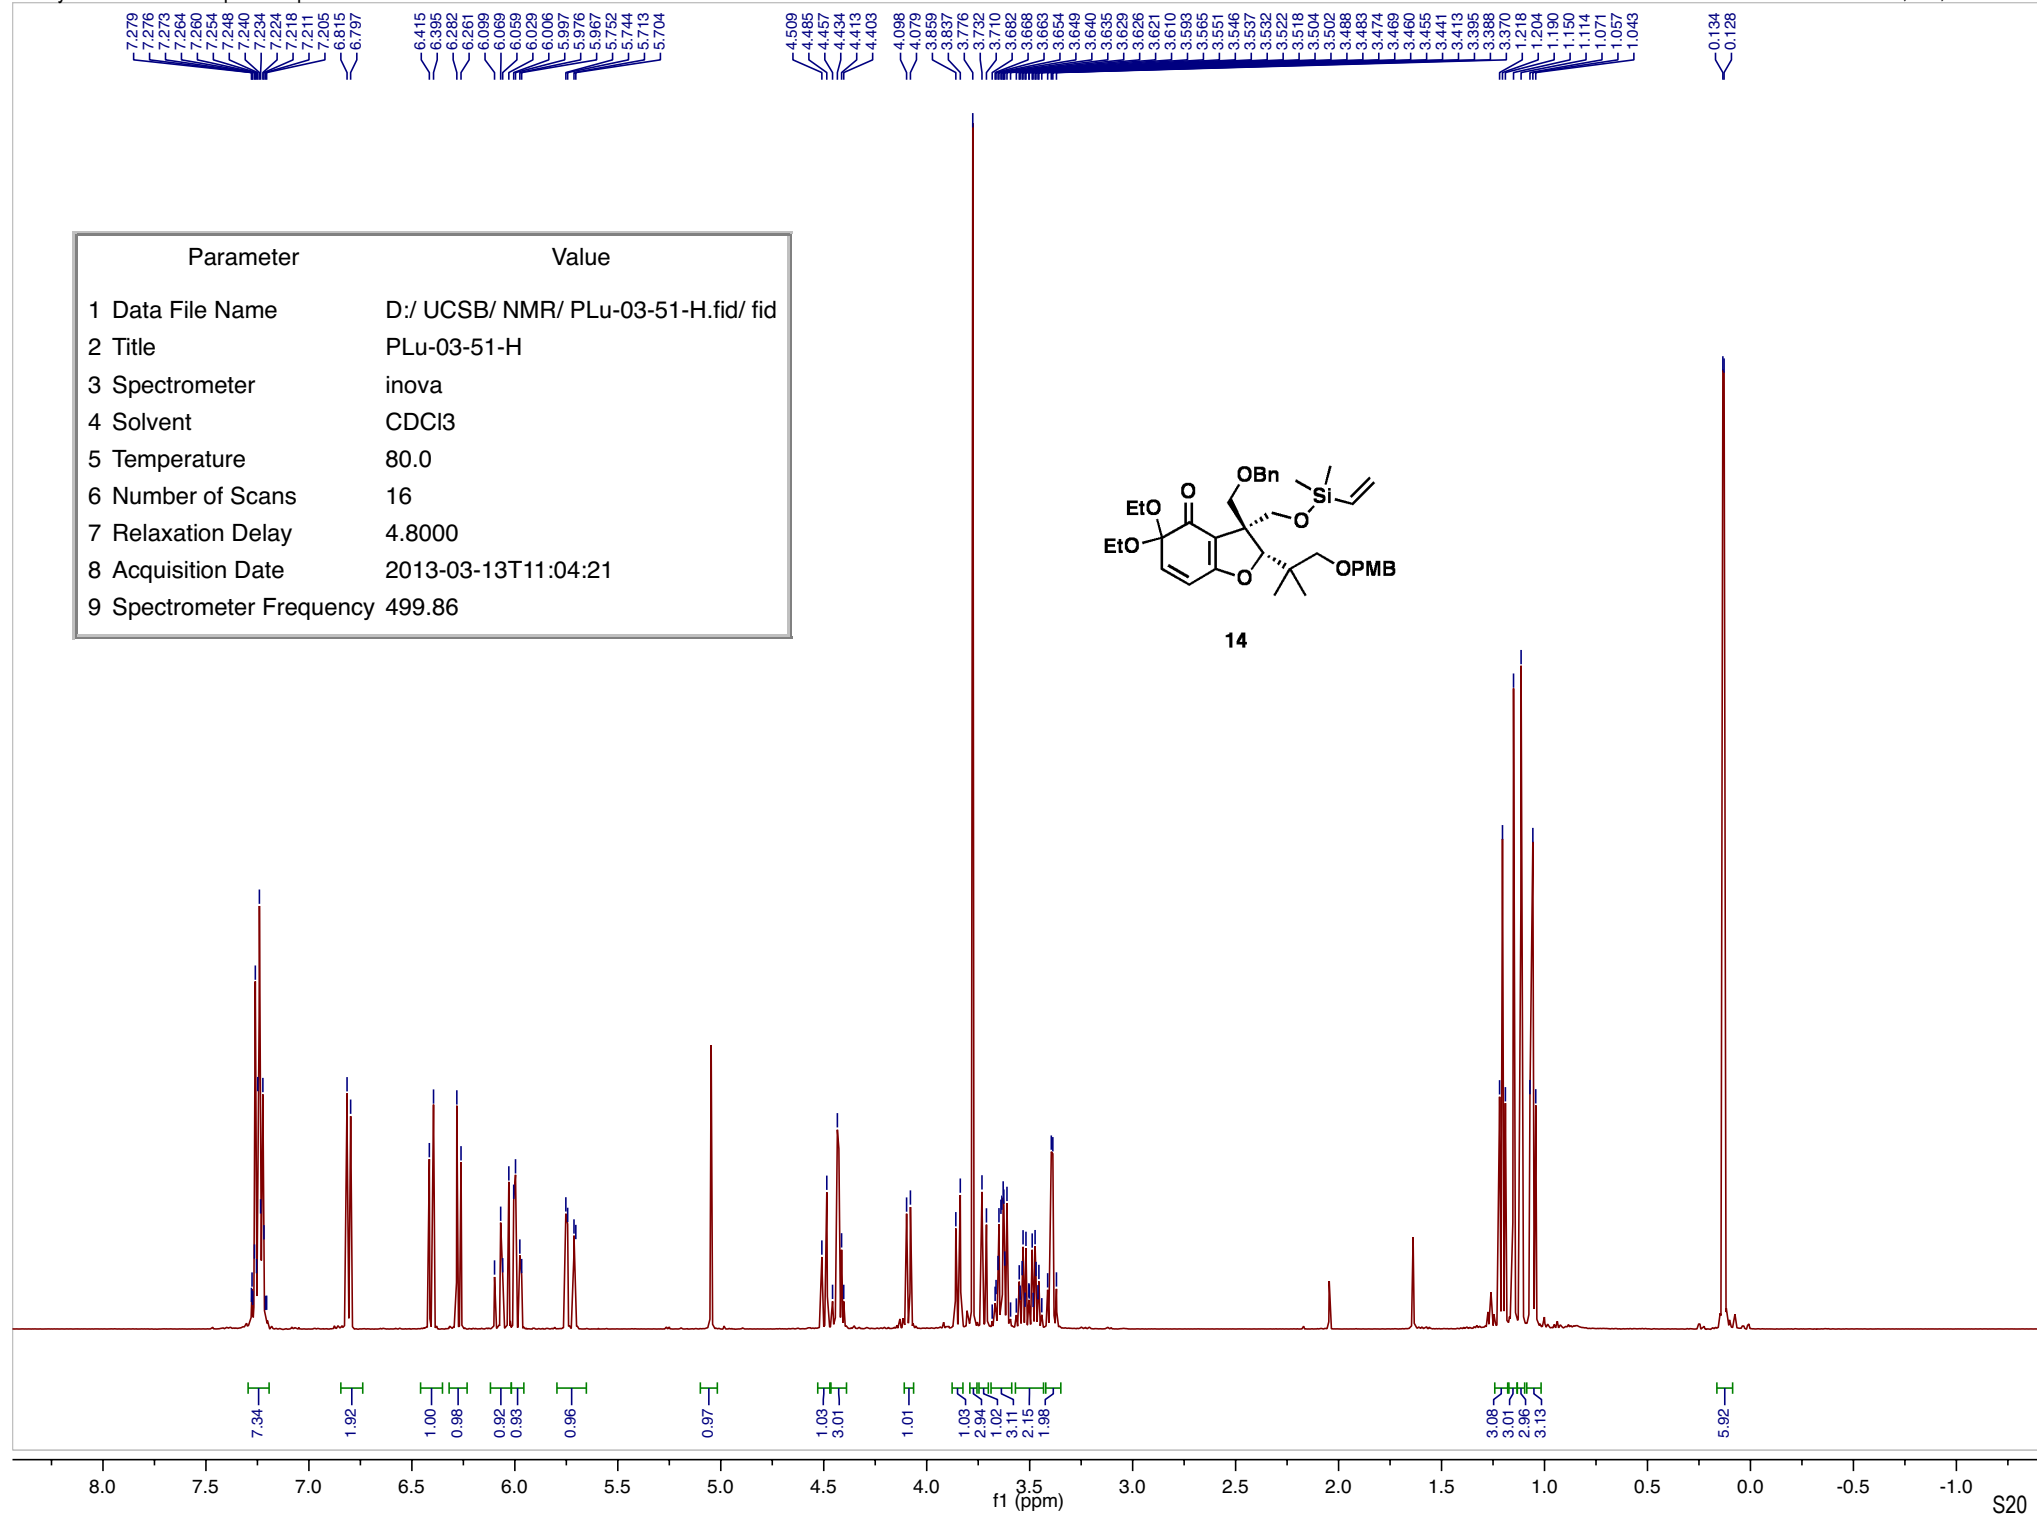

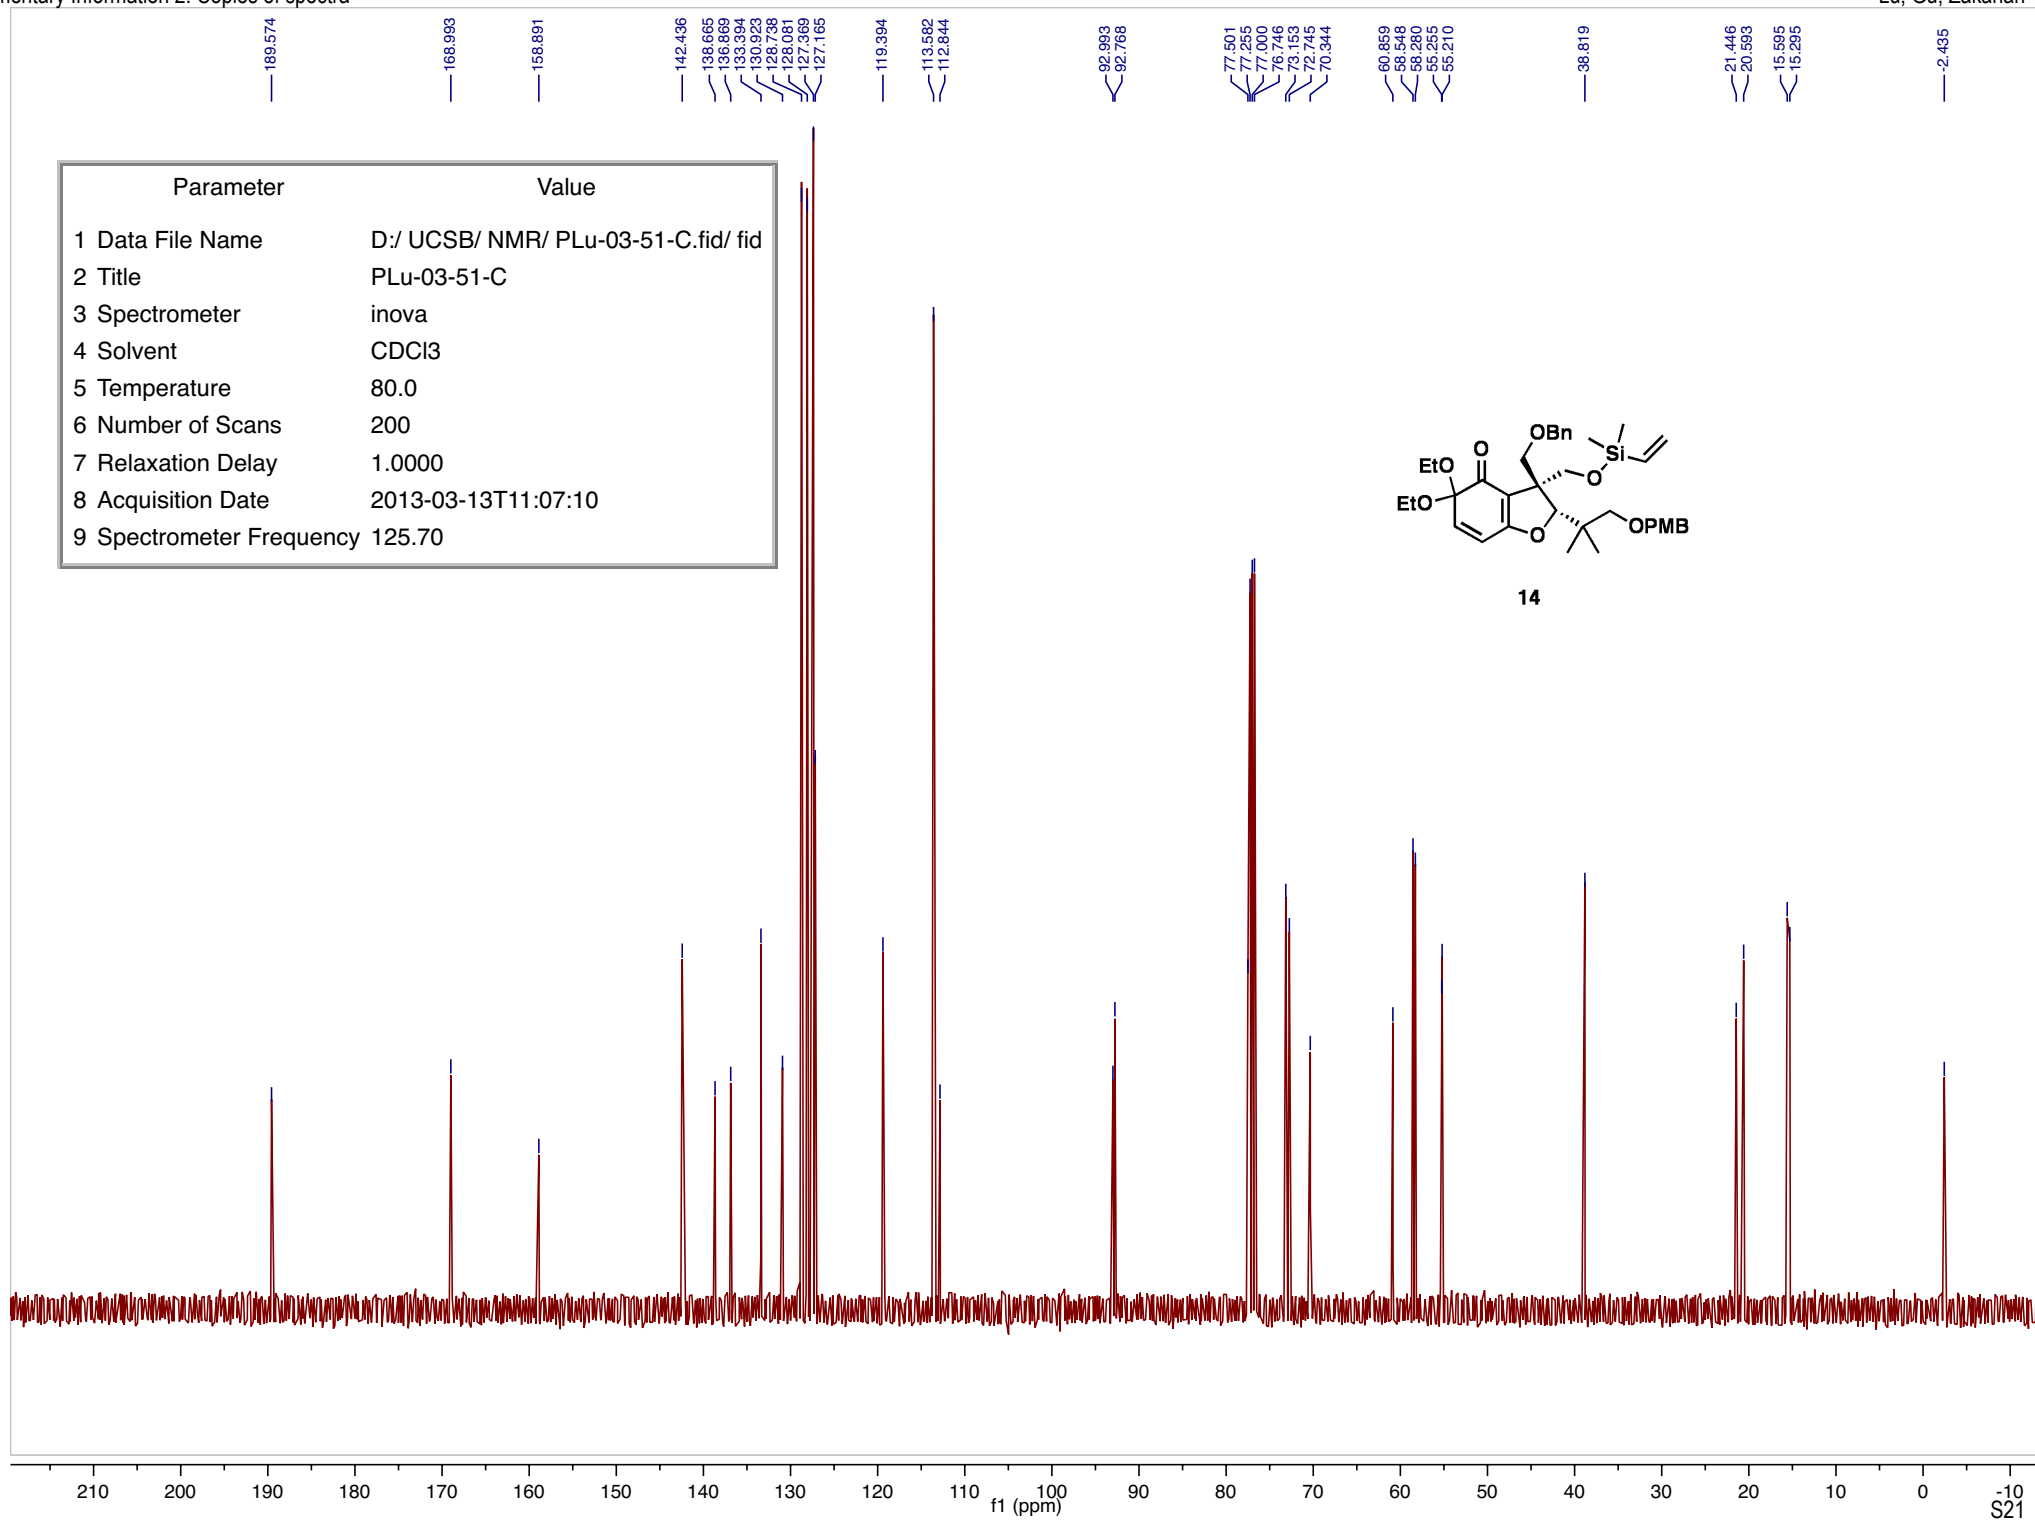

| Parameter                | Value                               |
|--------------------------|-------------------------------------|
| 1 Data File Name         | D:/ UCSB/ NMR/ PLu-03-25-H.fid/ fid |
| 2 Title                  | PLu-03-25-H                         |
| 3 Spectrometer           | inova                               |
| 4 Solvent                | cdcl3                               |
| 5 Temperature            | 25.0                                |
| 6 Number of Scans        | 16                                  |
| 7 Relaxation Delay       | 4.8000                              |
| 8 Acquisition Date       | 2013-03-04T22:57:00                 |
| 9 Spectrometer Frequency | 599.64                              |

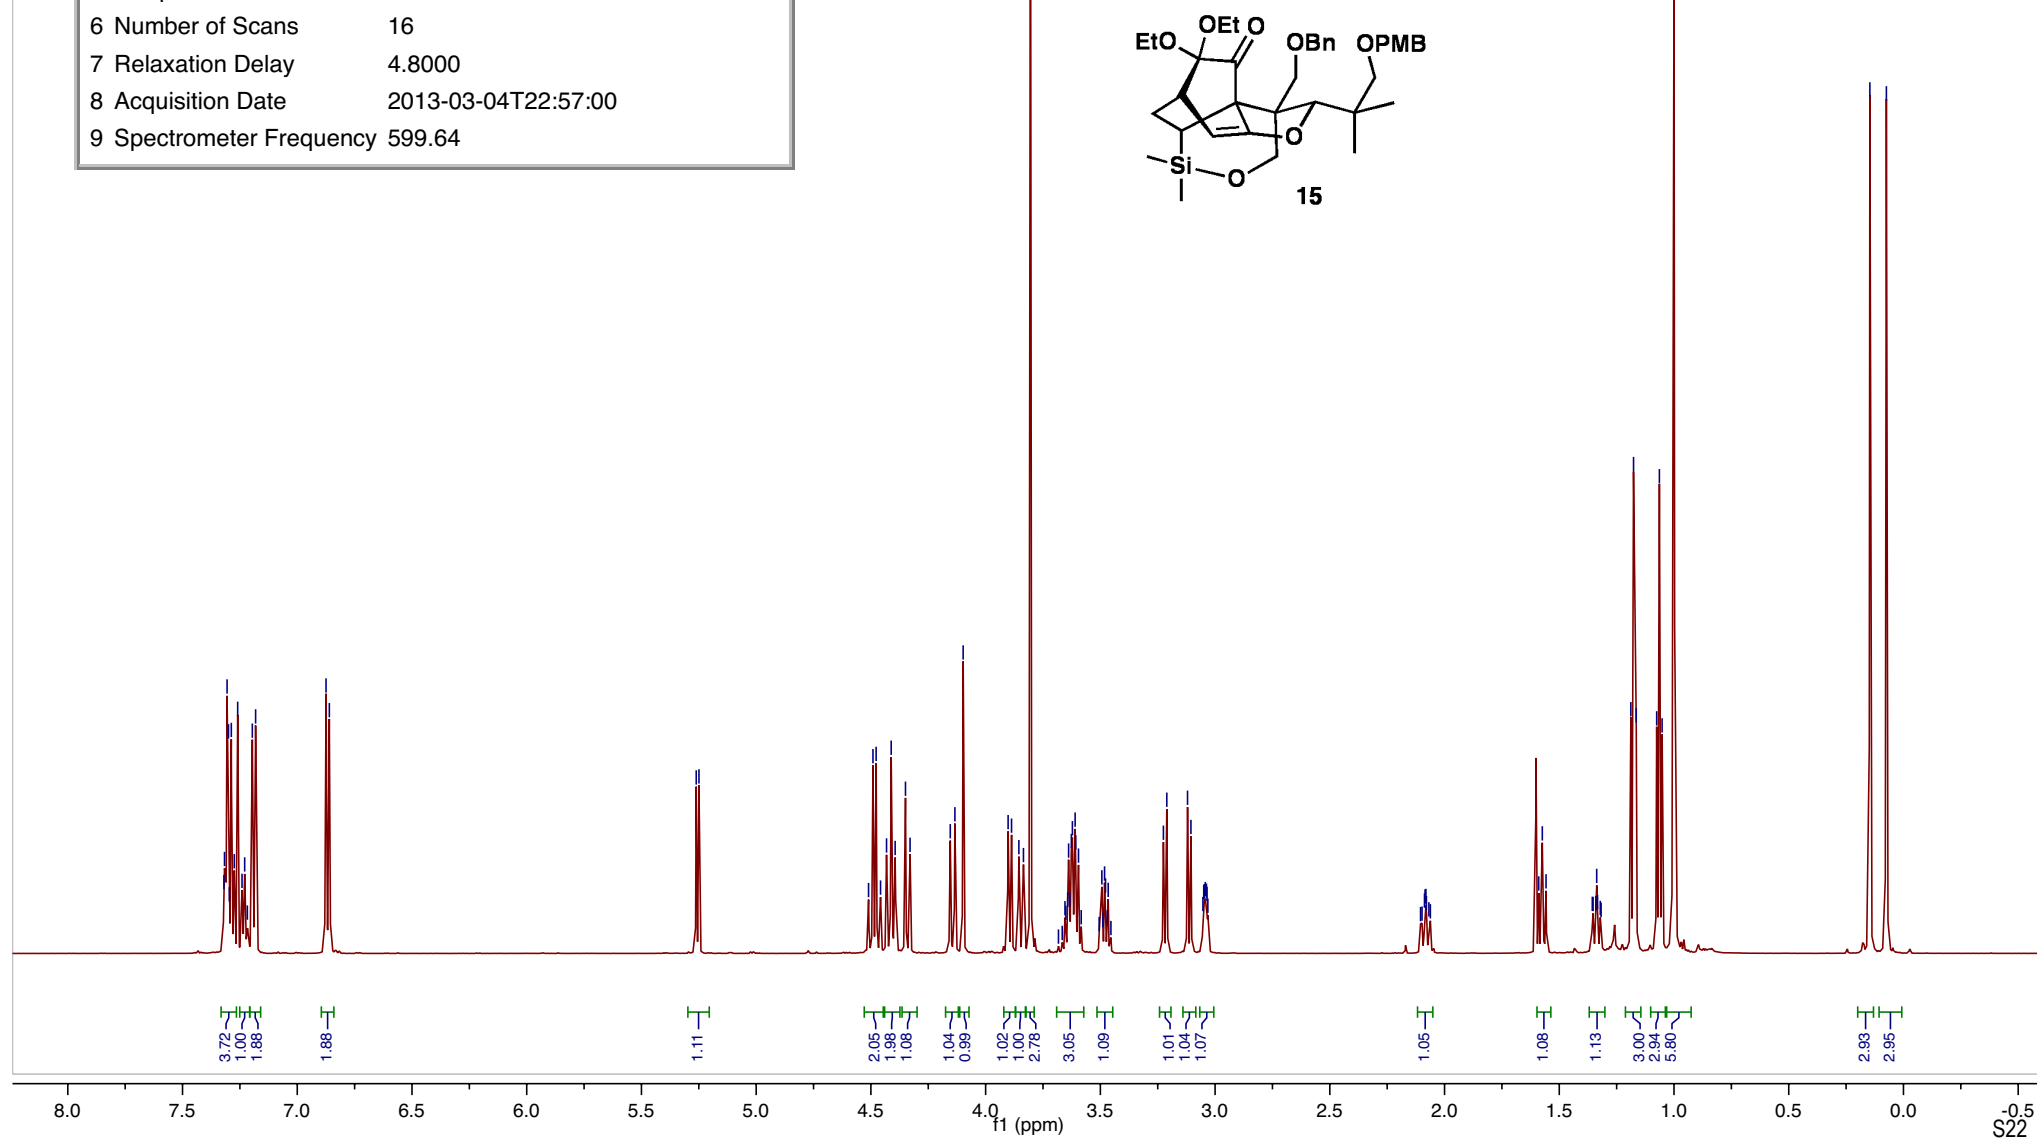

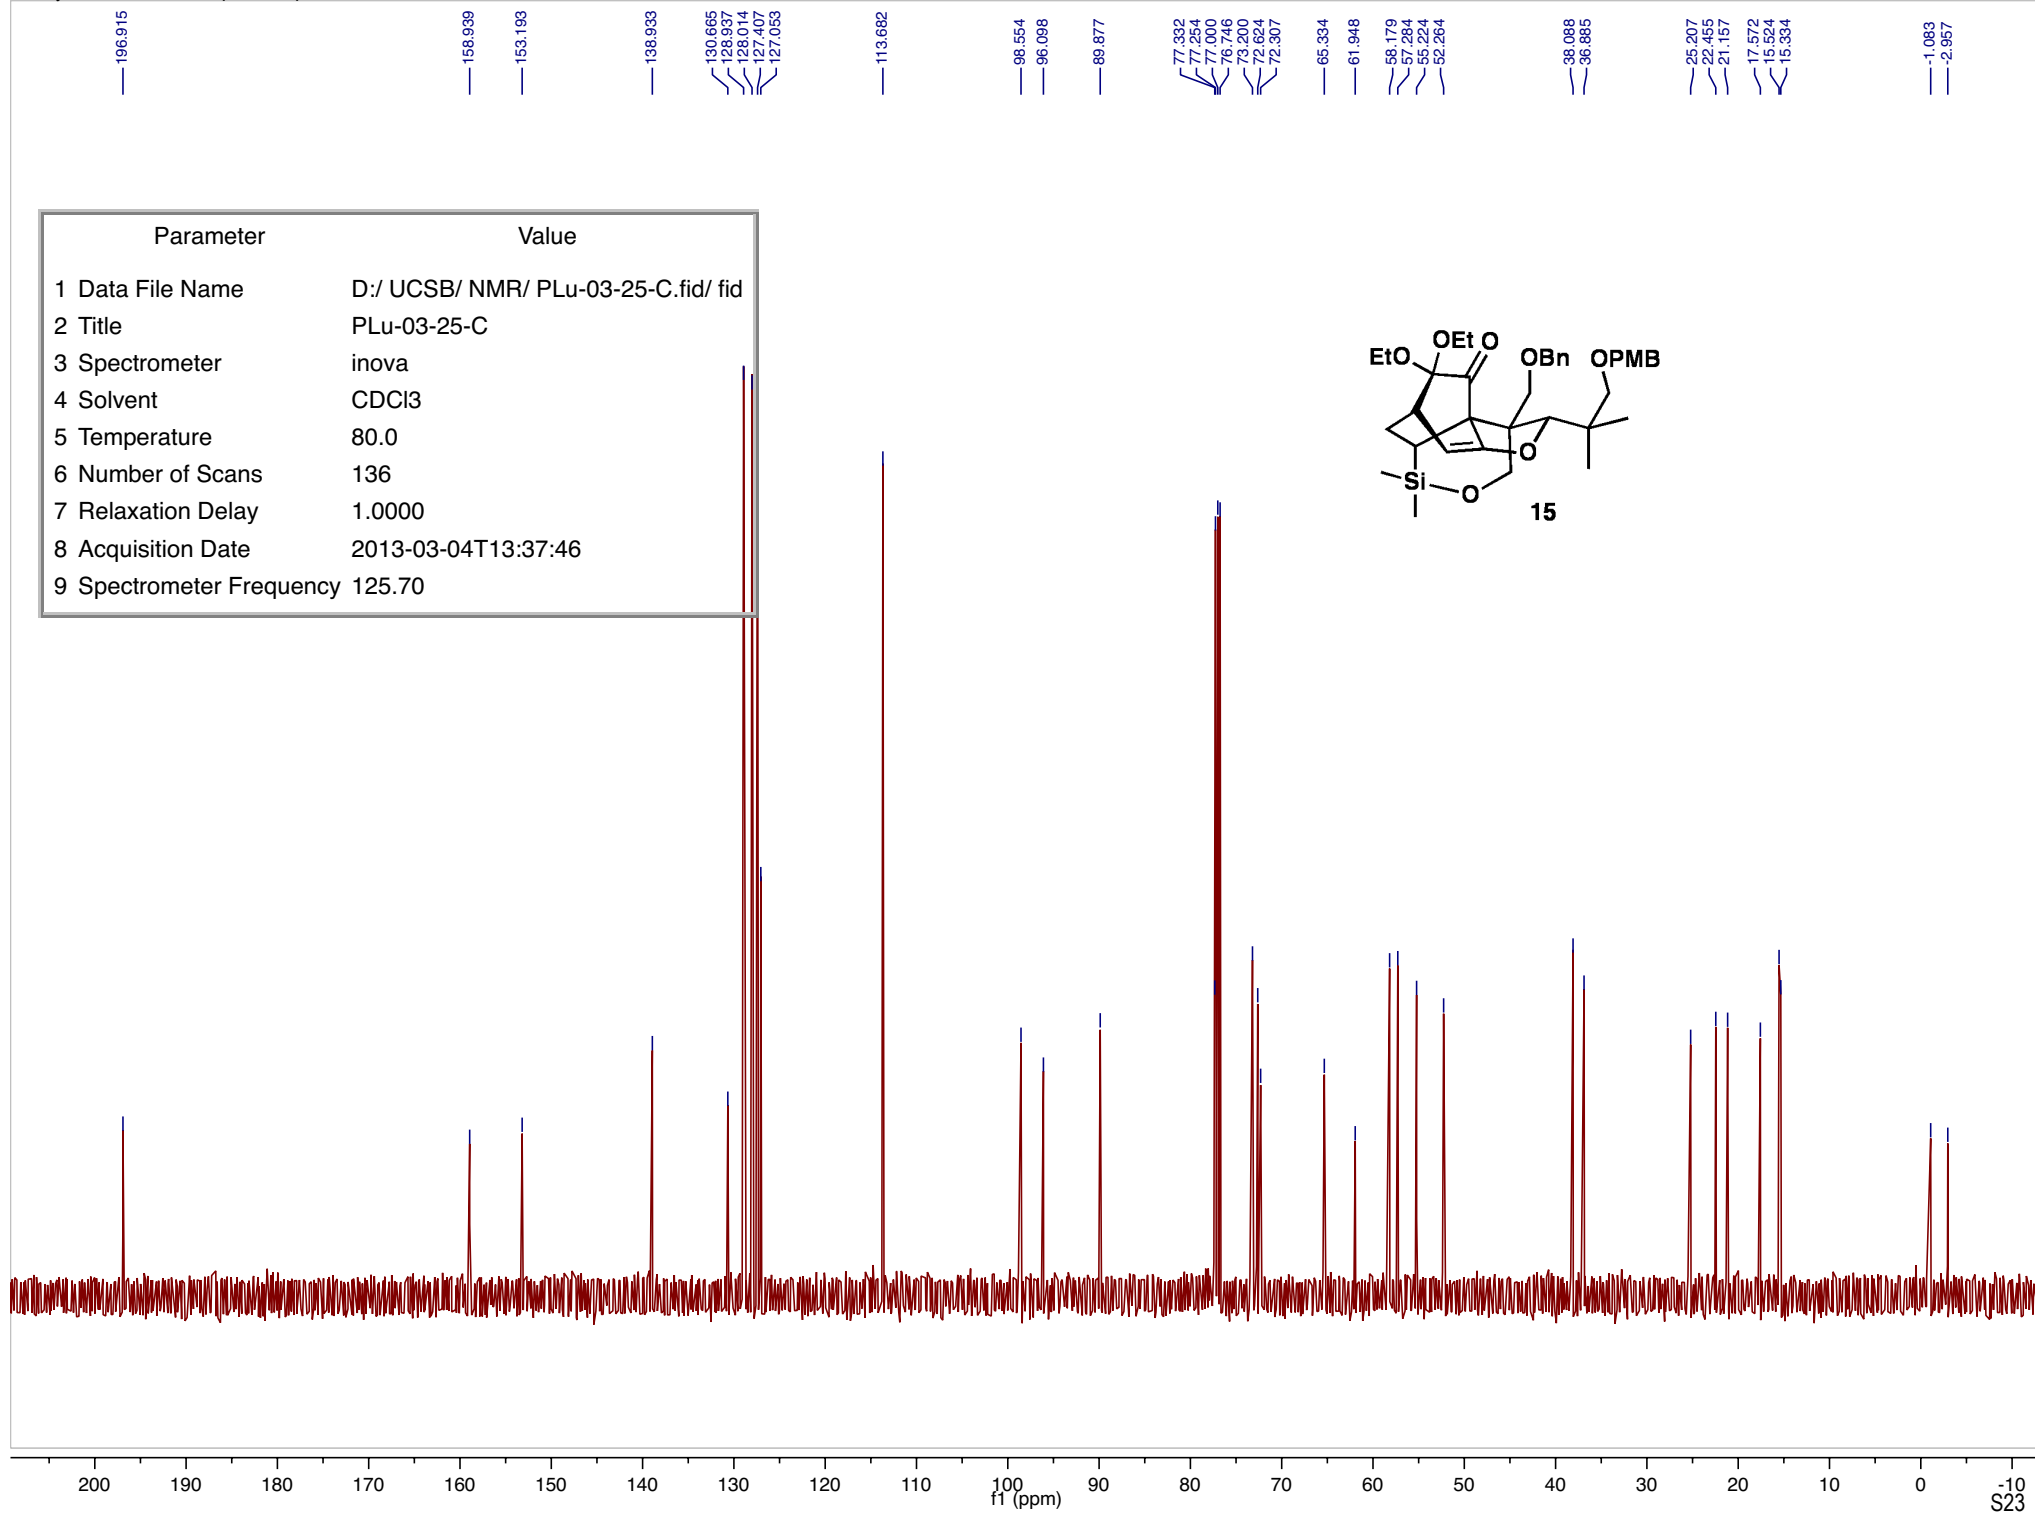

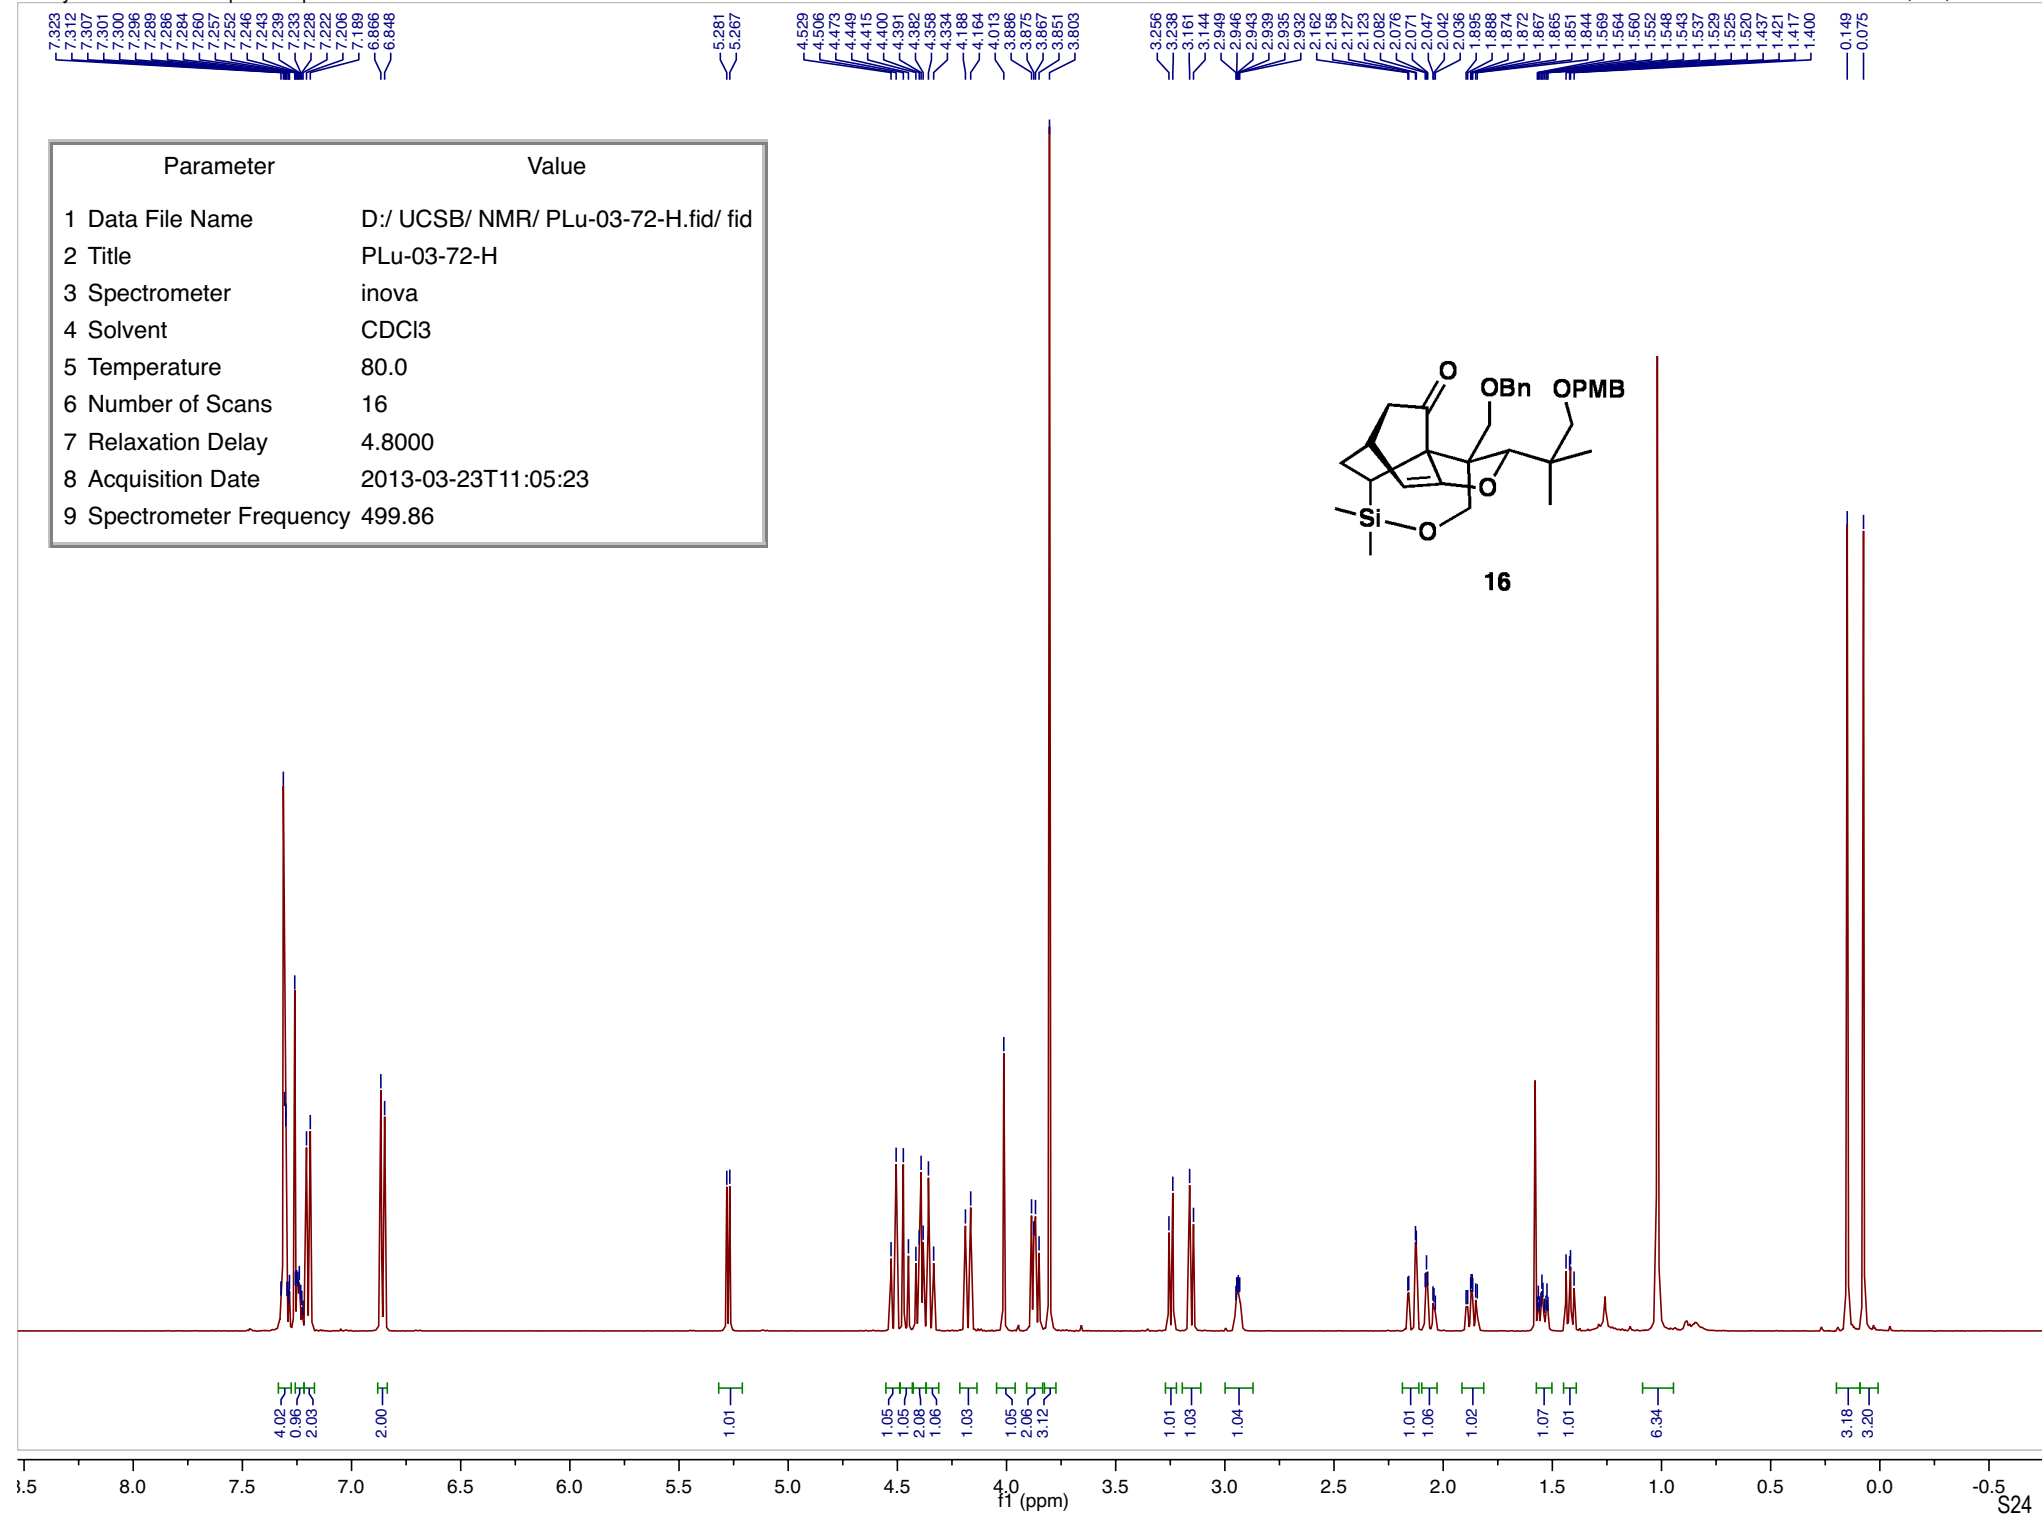



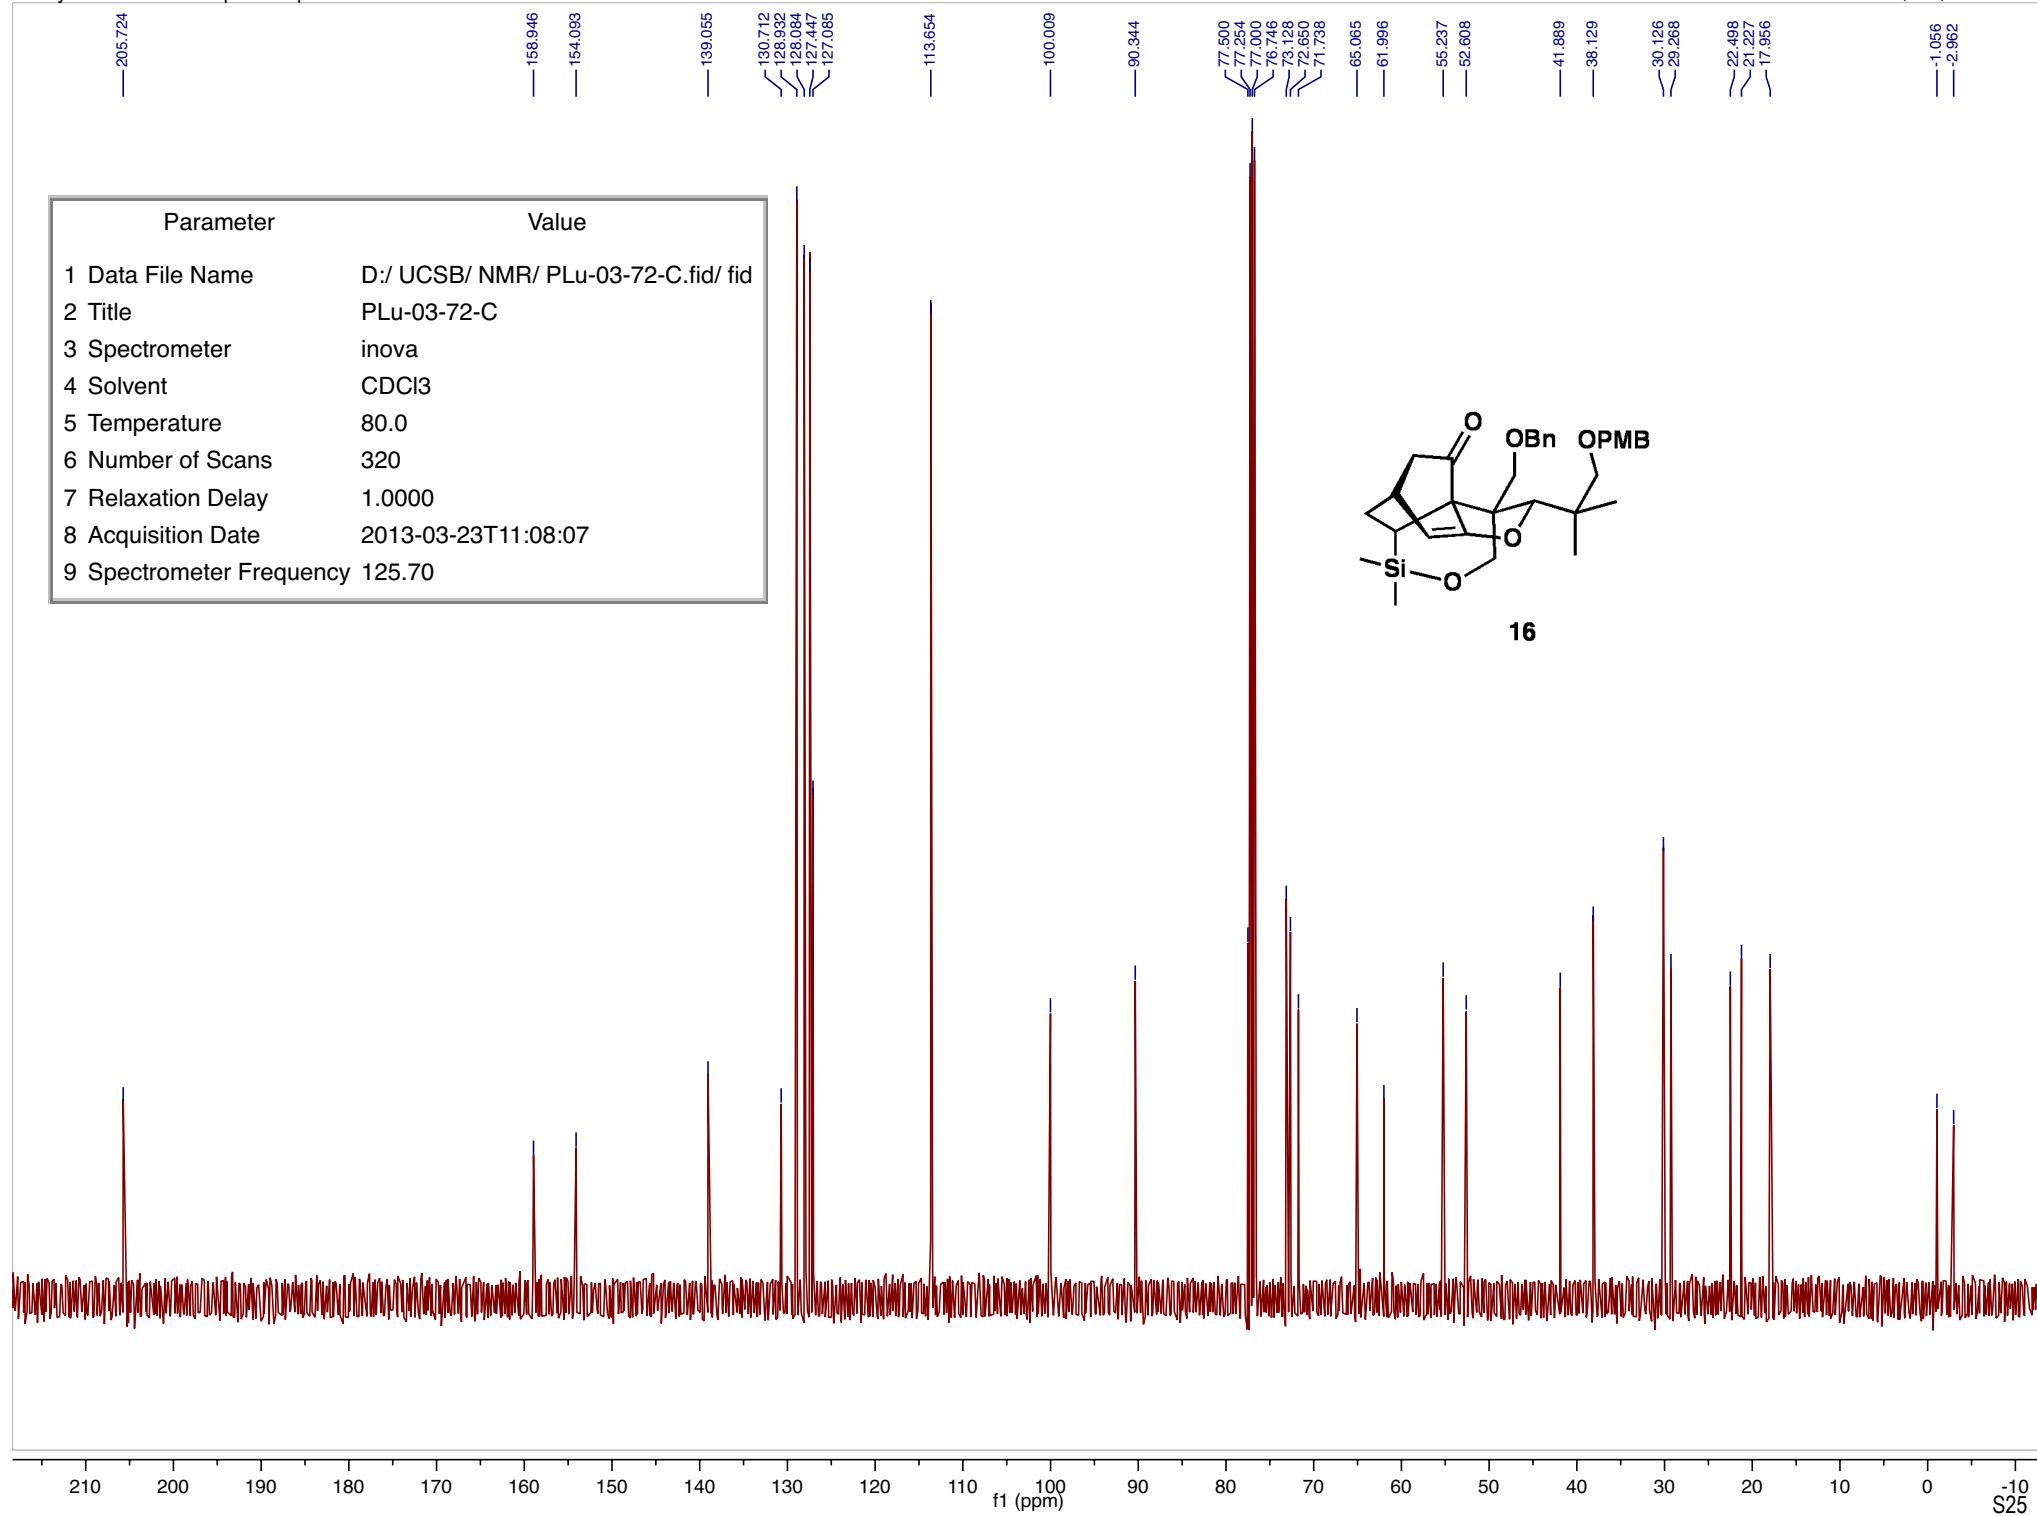

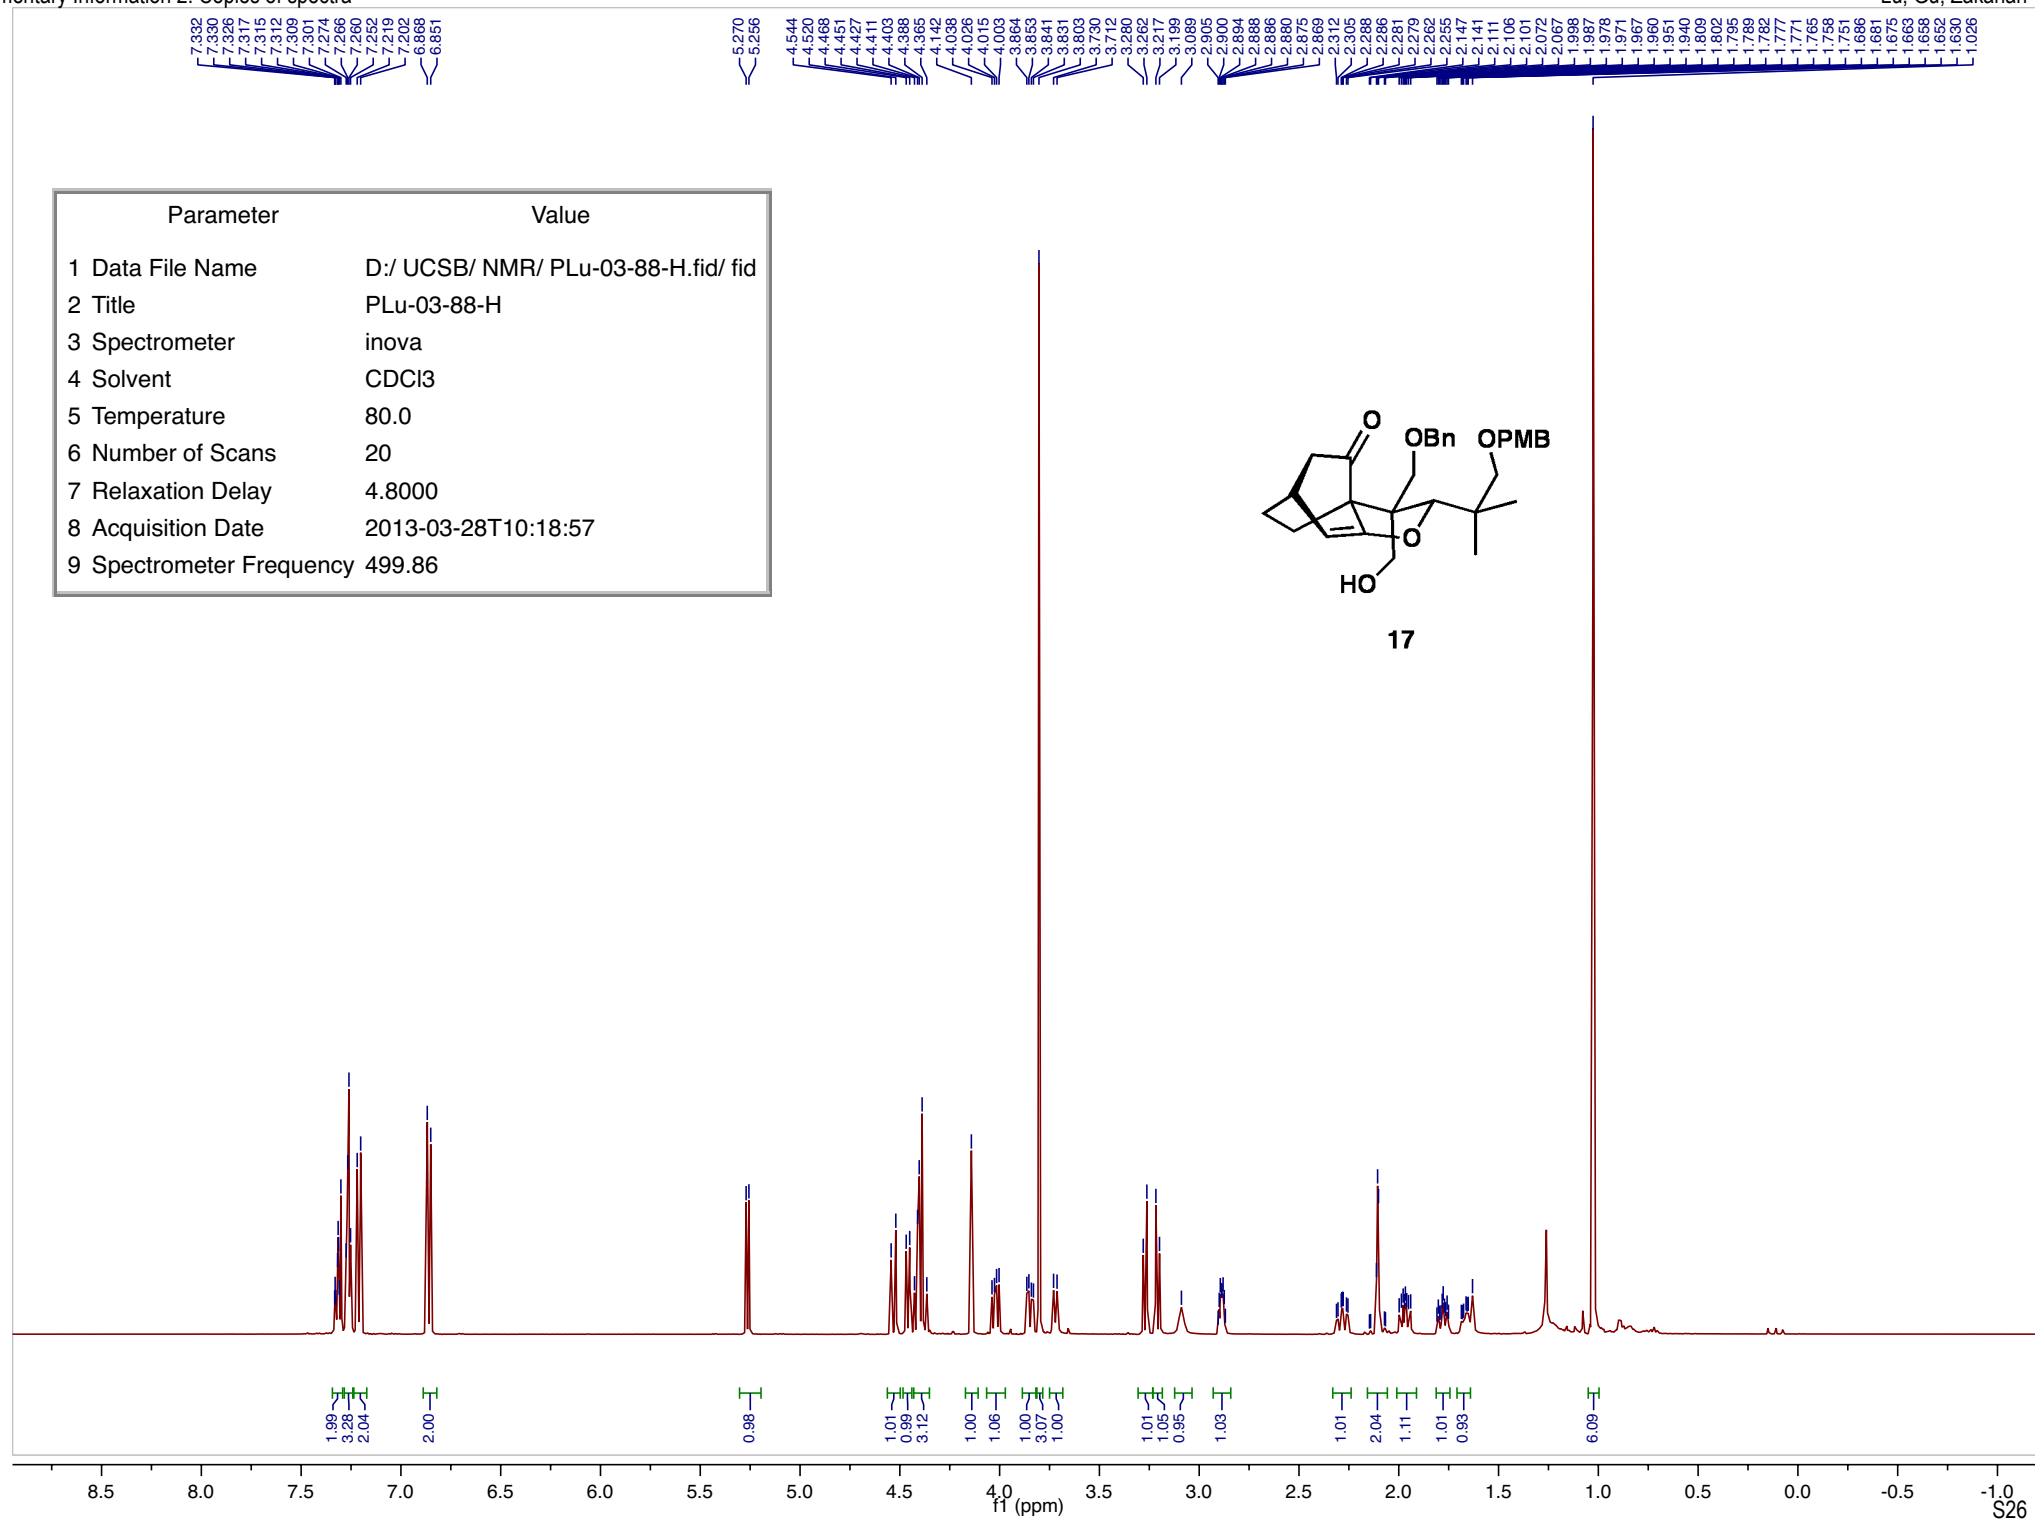

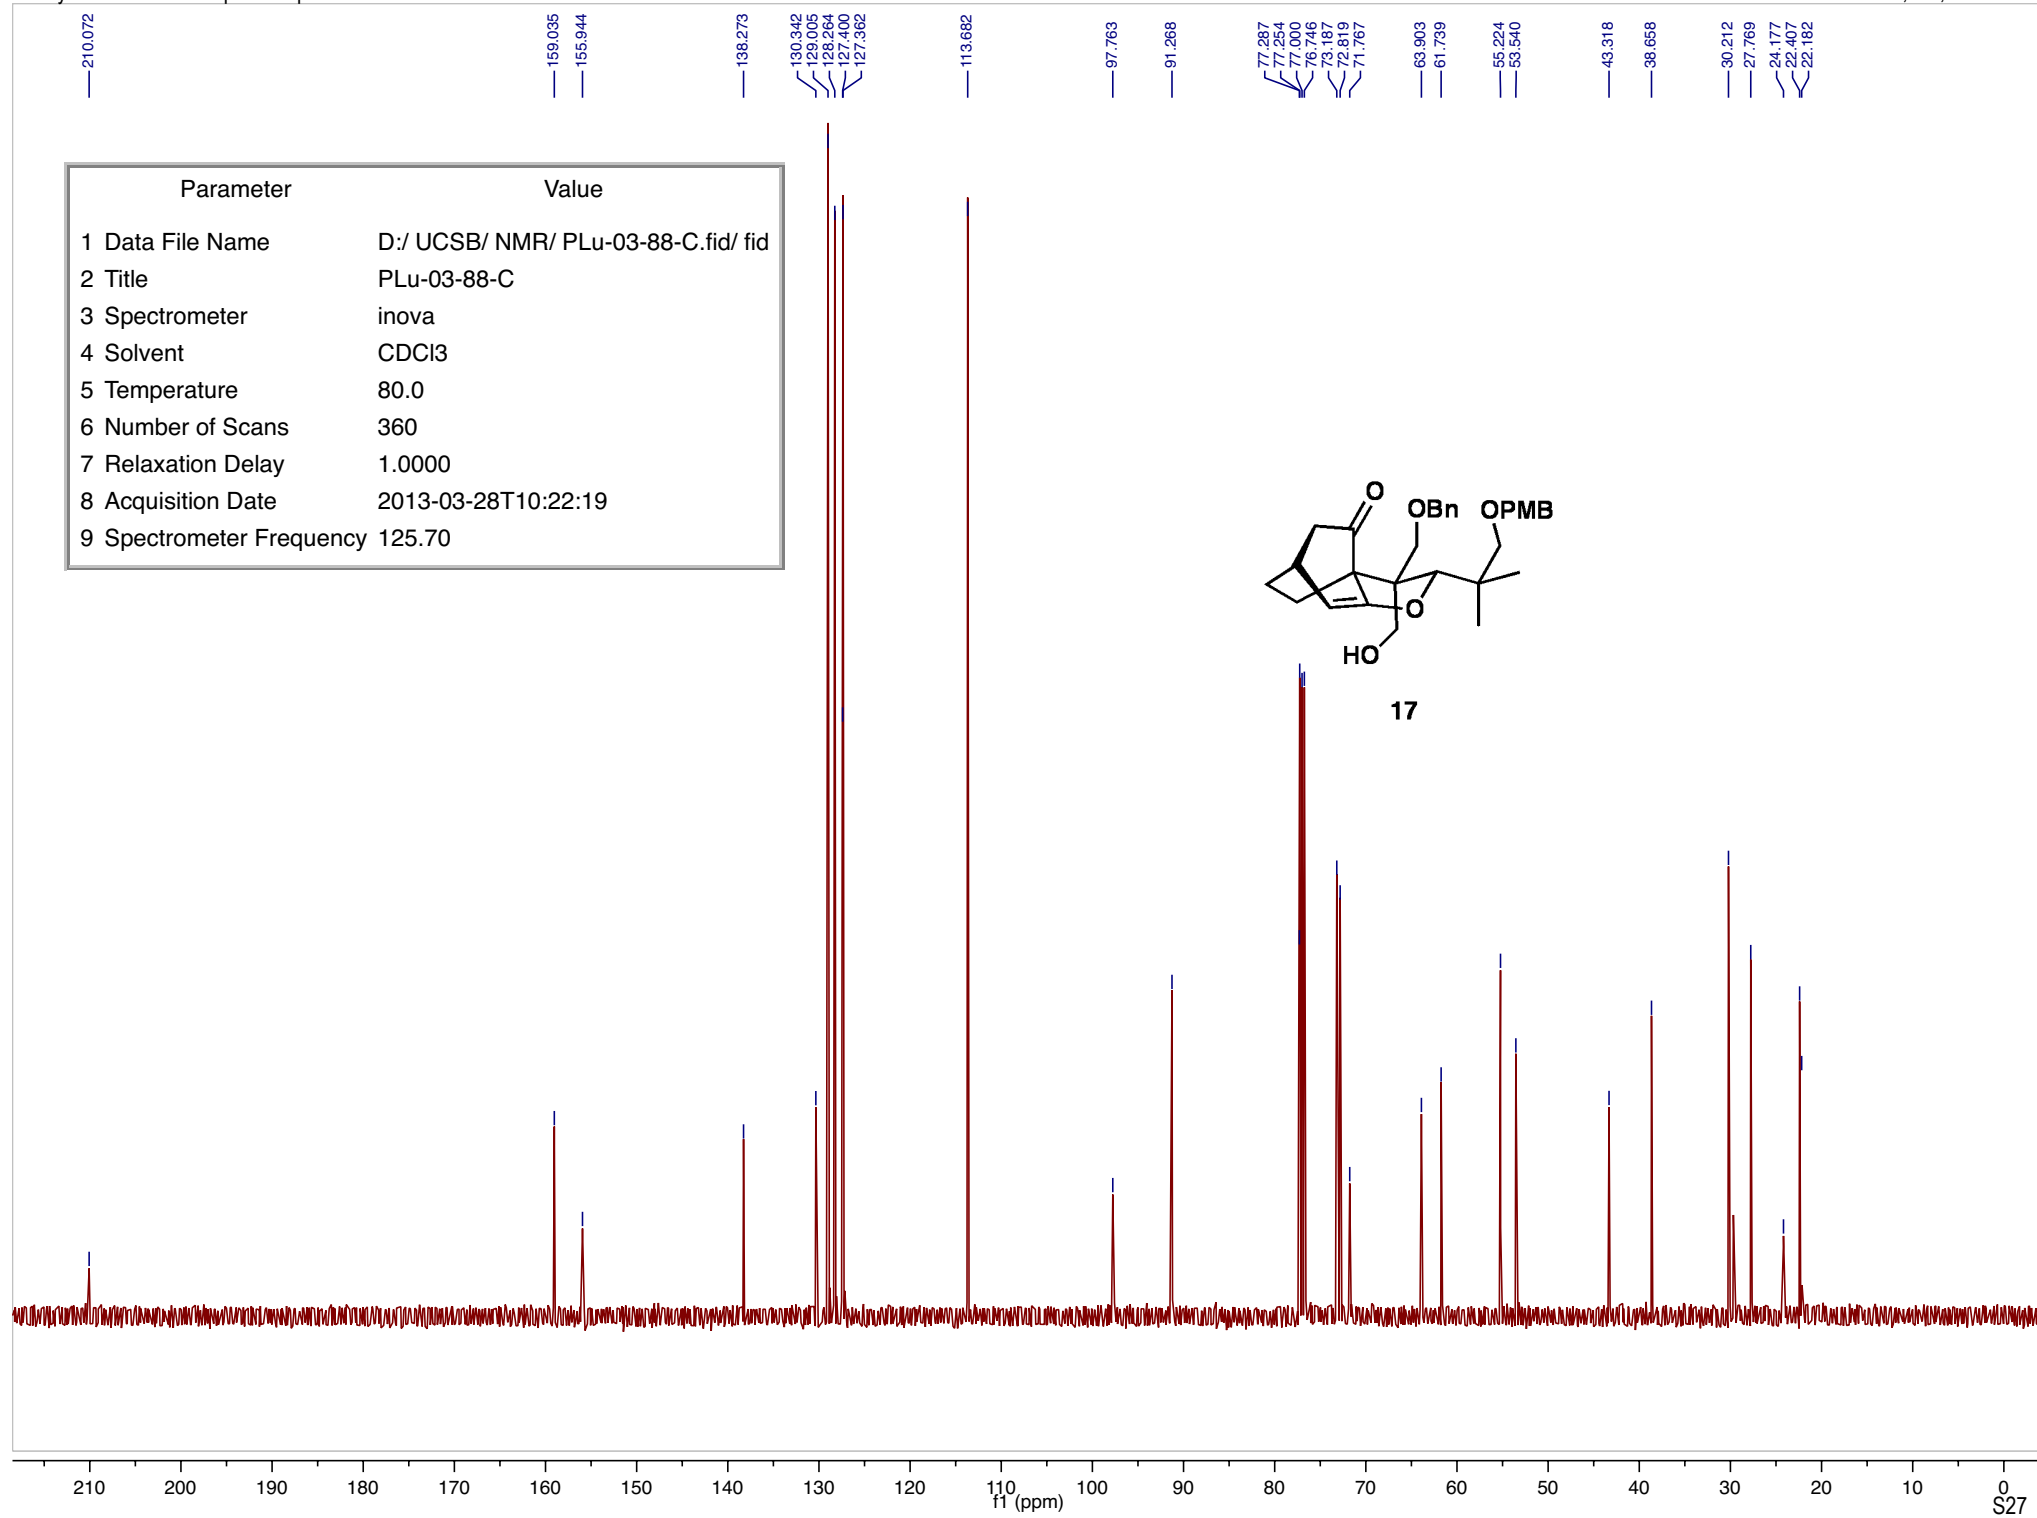

| Parameter                | Value                                 |
|--------------------------|---------------------------------------|
| 1 Data File Name         | D:/ UCSB/ NMR/ PLu-03-226-2H.fid/ fid |
| 2 Title                  | PLu-03-226-2H                         |
| 3 Spectrometer           | inova                                 |
| 4 Solvent                | CDCl3                                 |
| 5 Temperature            | 25.0                                  |
| 6 Number of Scans        | 16                                    |
| 7 Relaxation Delay       | 4.8000                                |
| 8 Acquisition Date       | 2013-06-11T22:08:53                   |
| 9 Spectrometer Frequency | 499.86                                |

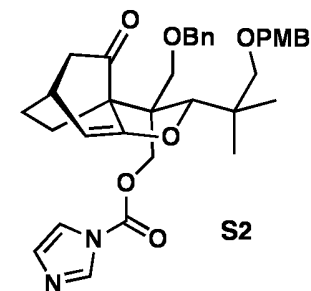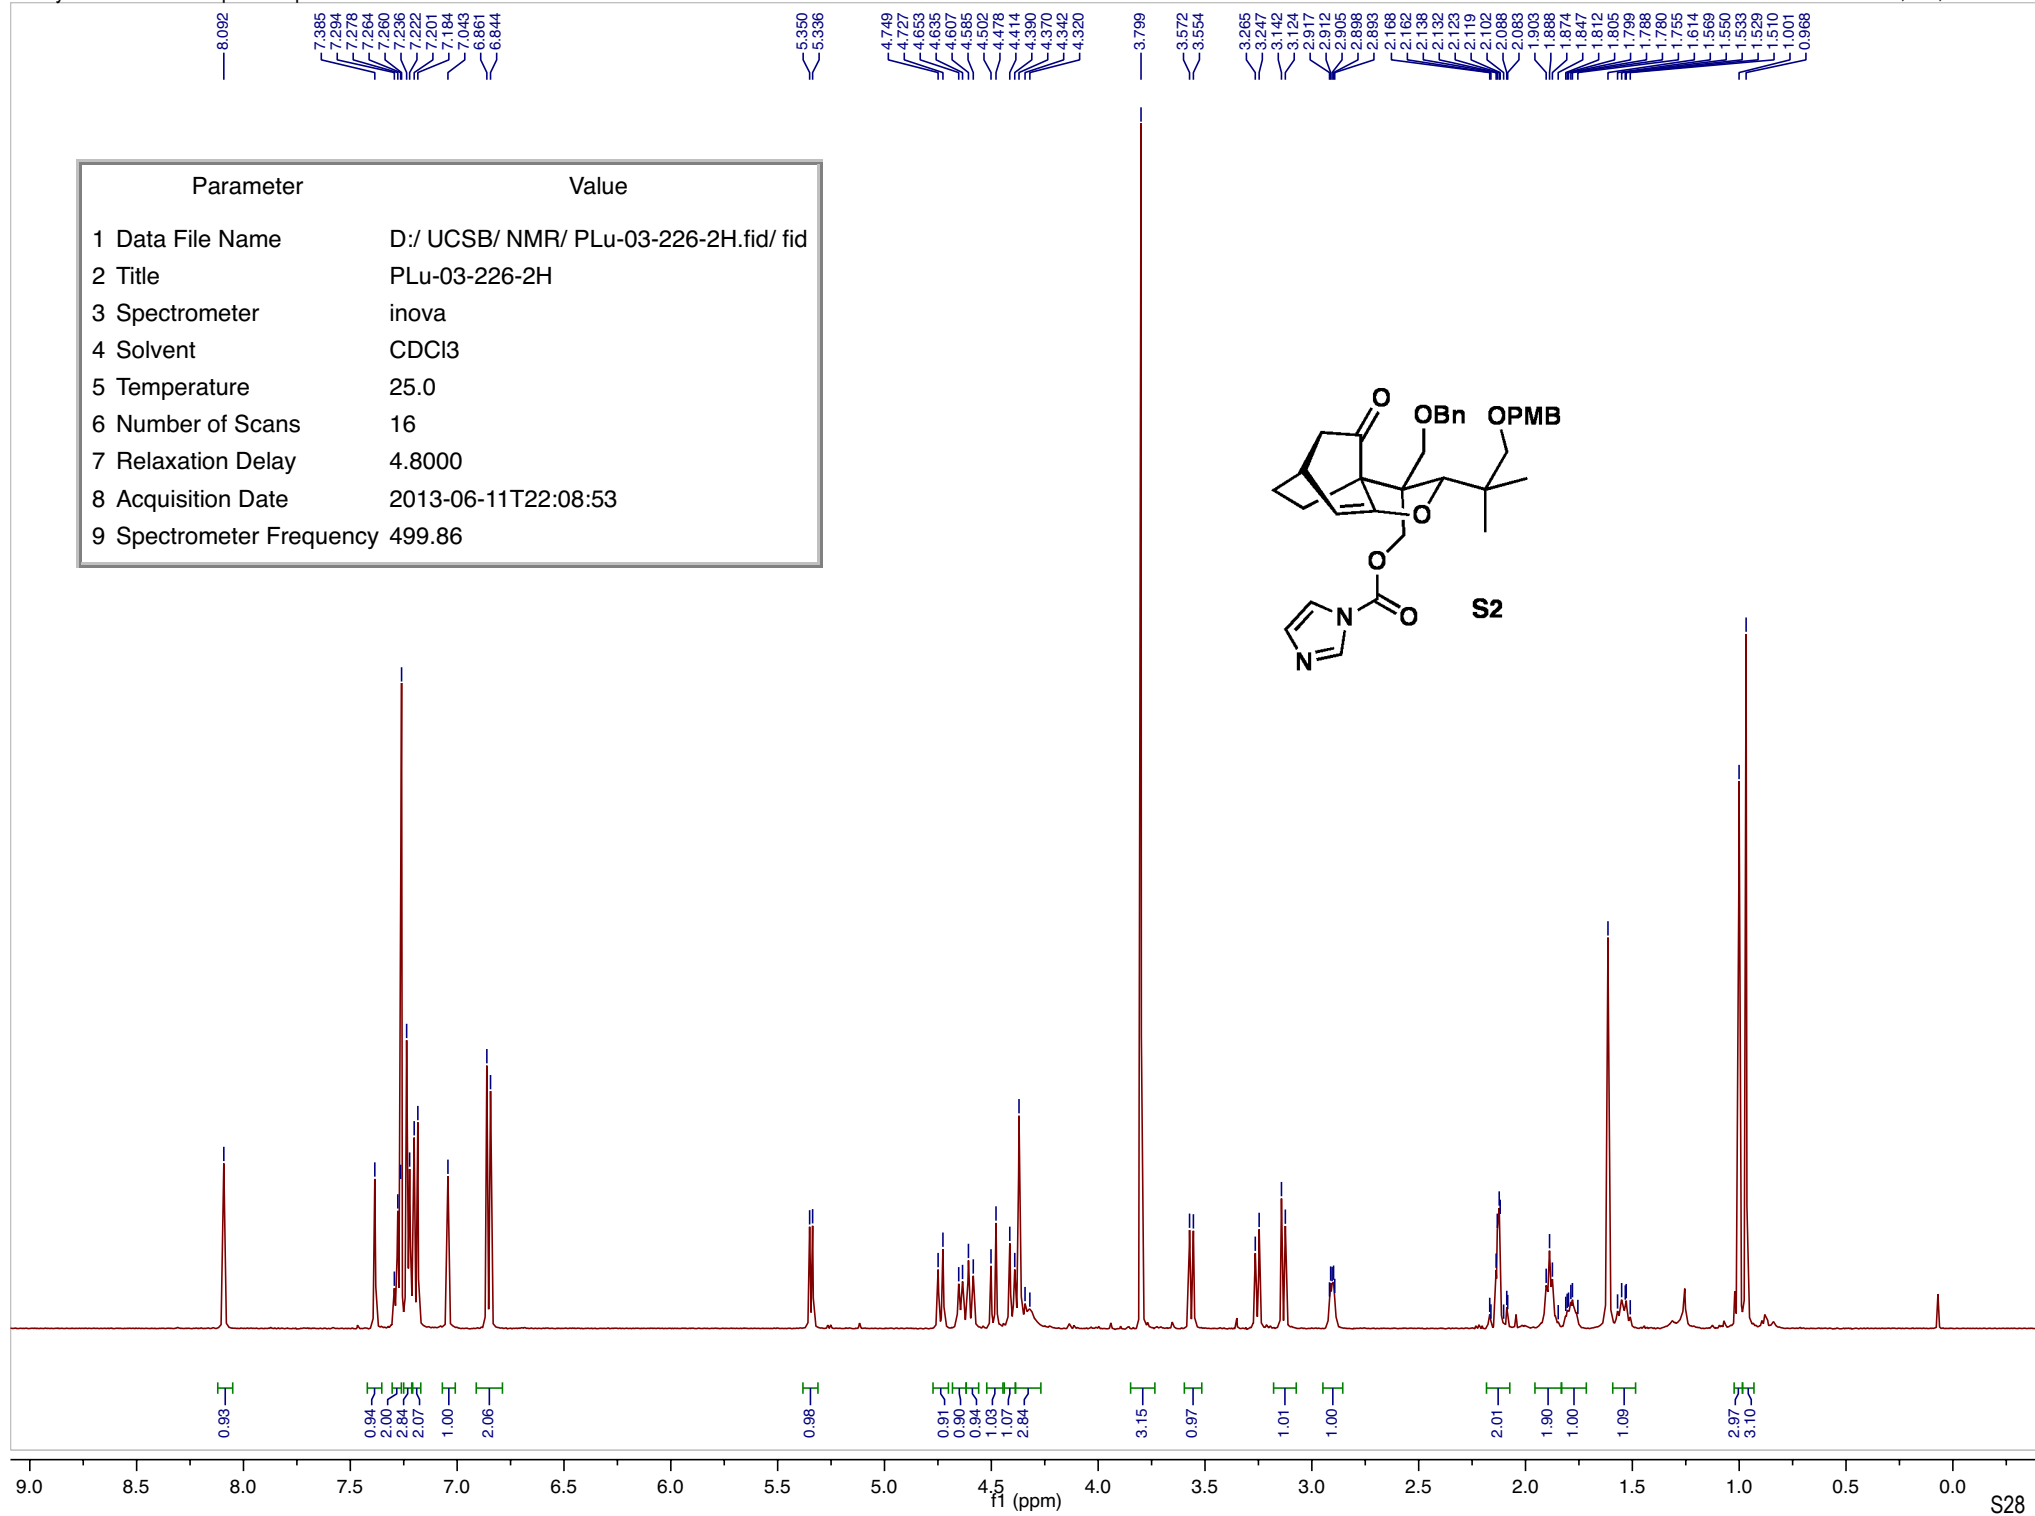

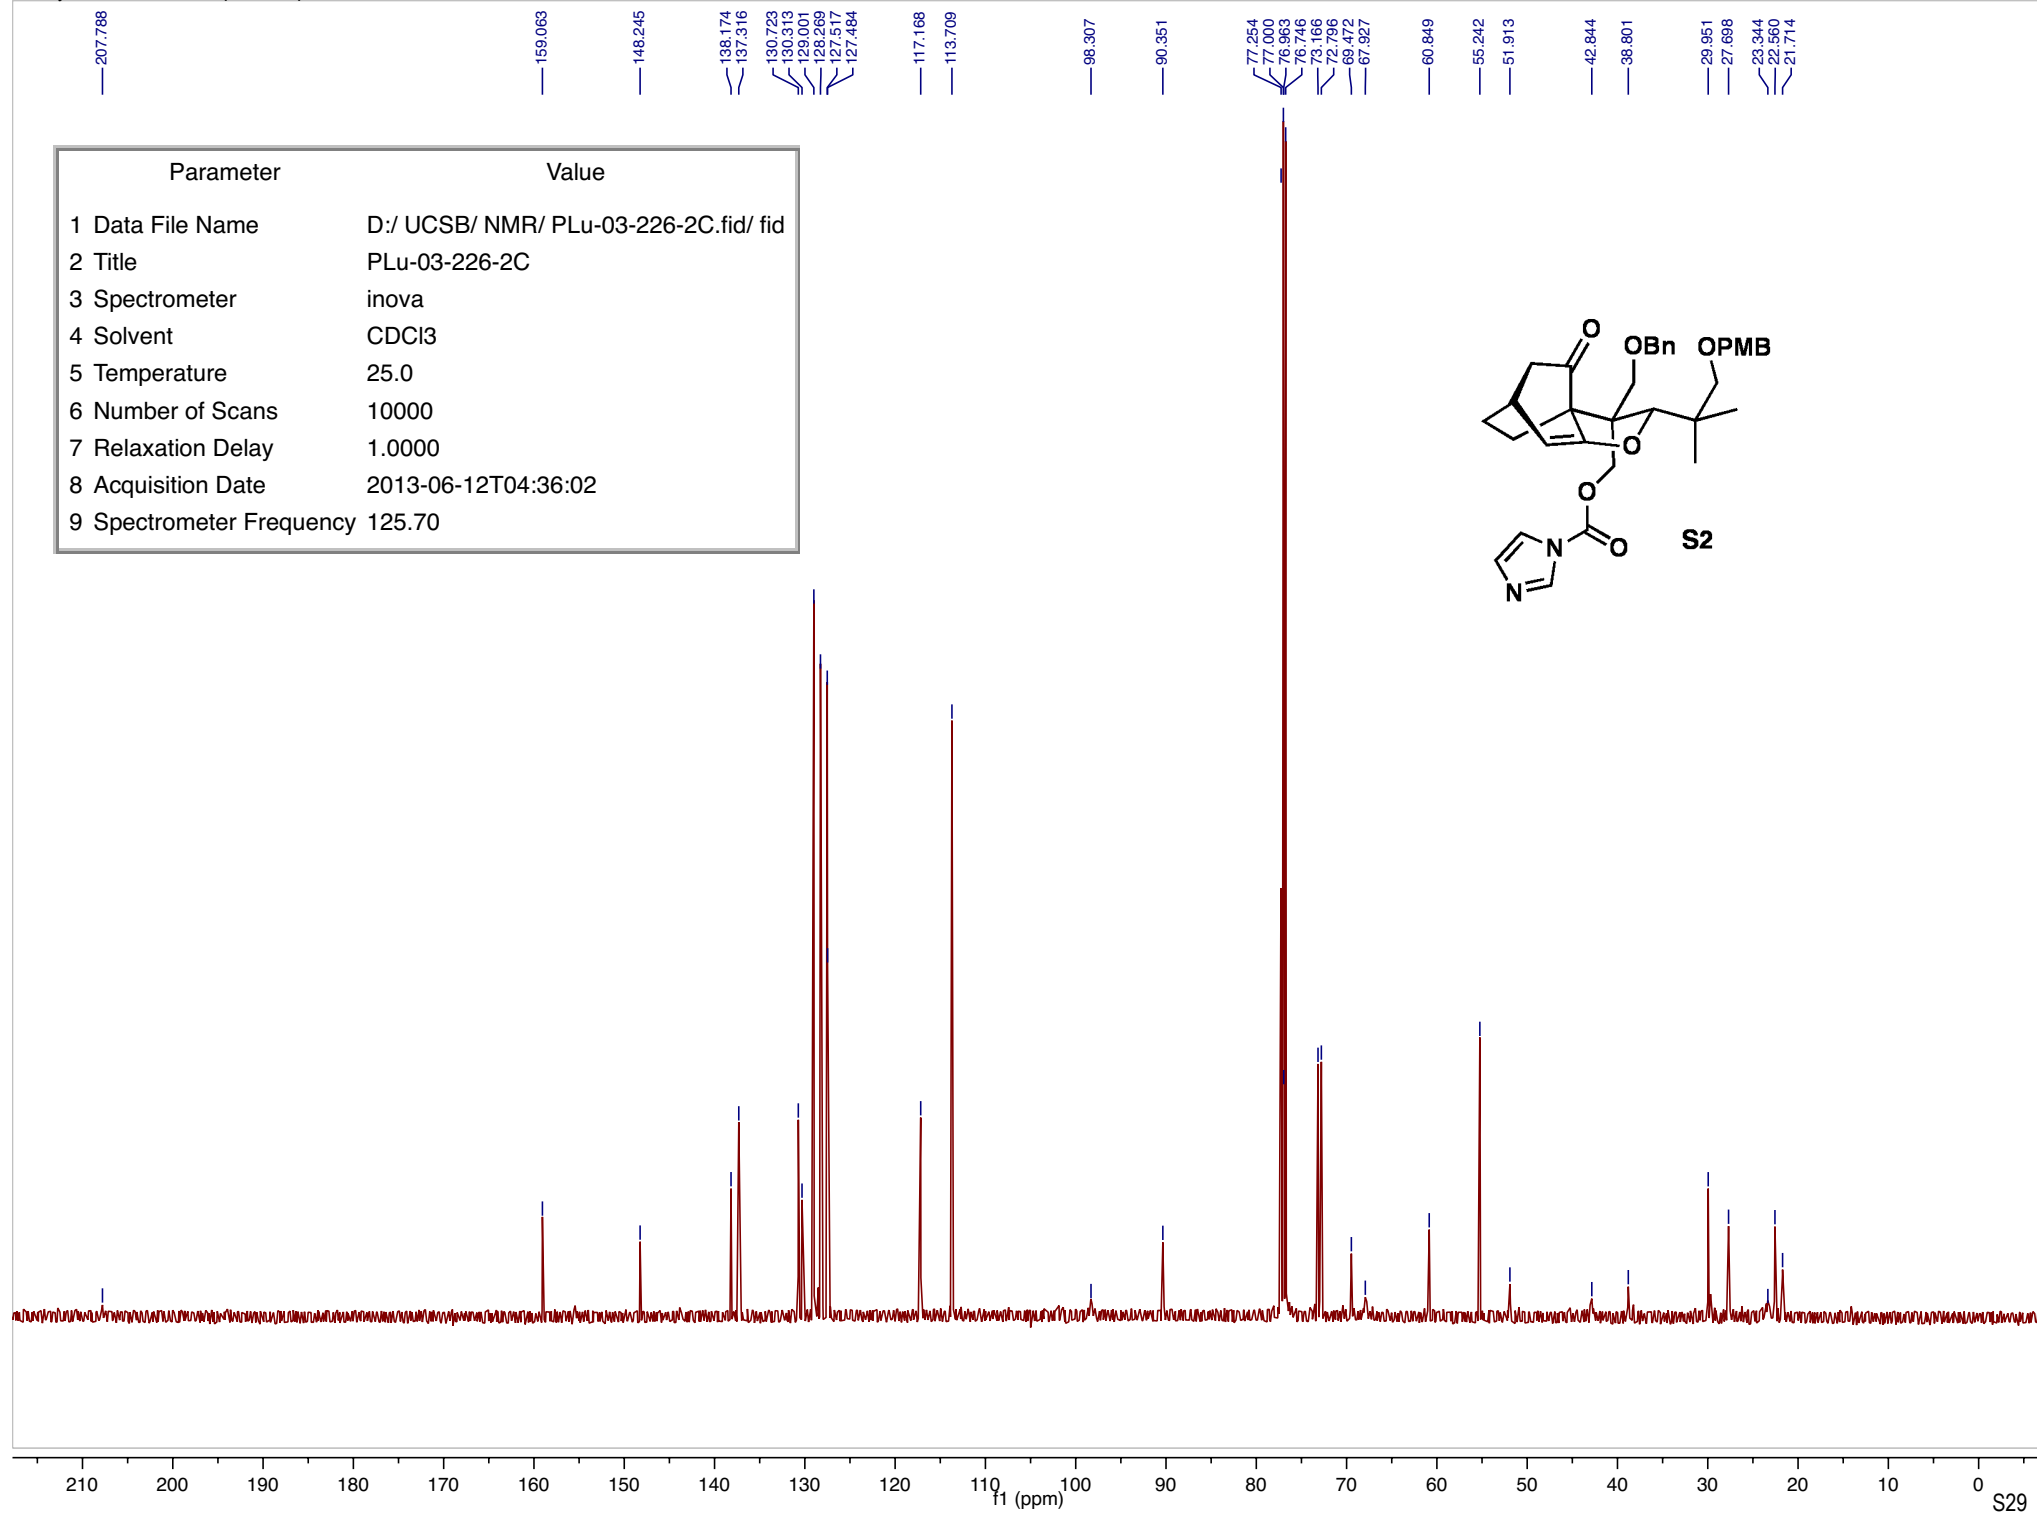

| Parameter                | Value                               |
|--------------------------|-------------------------------------|
| 1 Data File Name         | D:/ UCSB/ NMR/ PLu-03-98-H.fid/ fid |
| 2 Title                  | PLu-03-98-H                         |
| 3 Spectrometer           | inova                               |
| 4 Solvent                | CDCl <sub>3</sub>                   |
| 5 Temperature            | 80.0                                |
| 6 Number of Scans        | 20                                  |
| 7 Relaxation Delay       | 4.8000                              |
| 8 Acquisition Date       | 2013-04-01T10:14:26                 |
| 9 Spectrometer Frequency | 499.86                              |

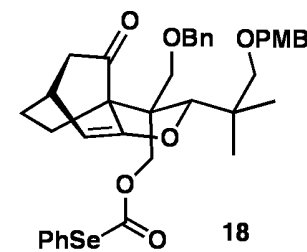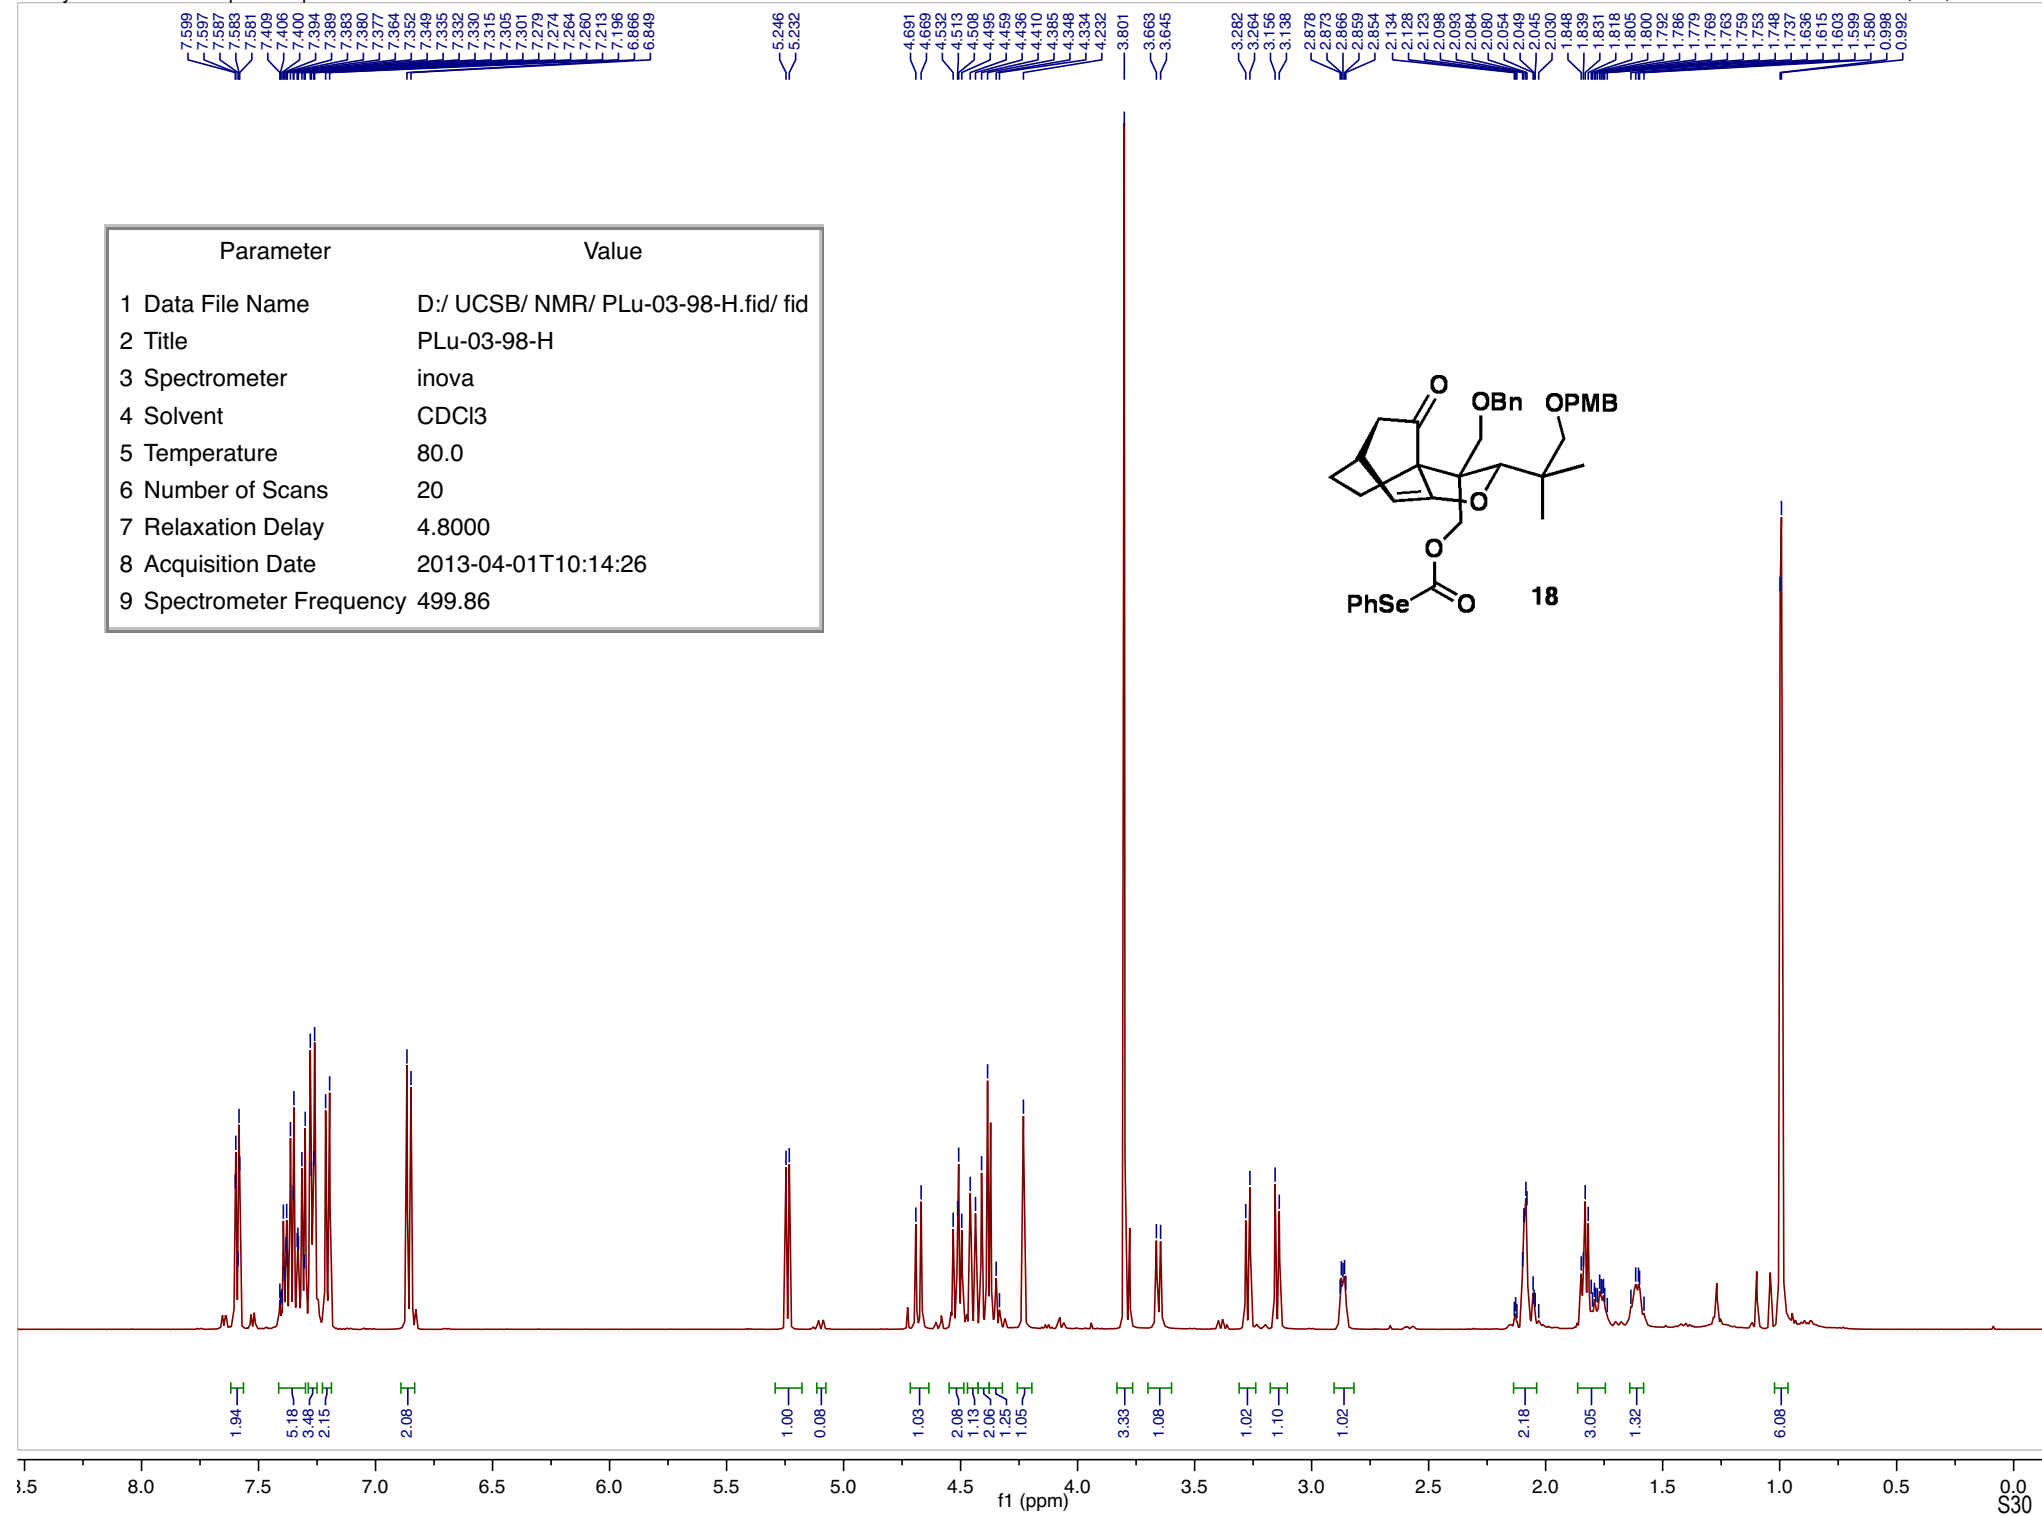

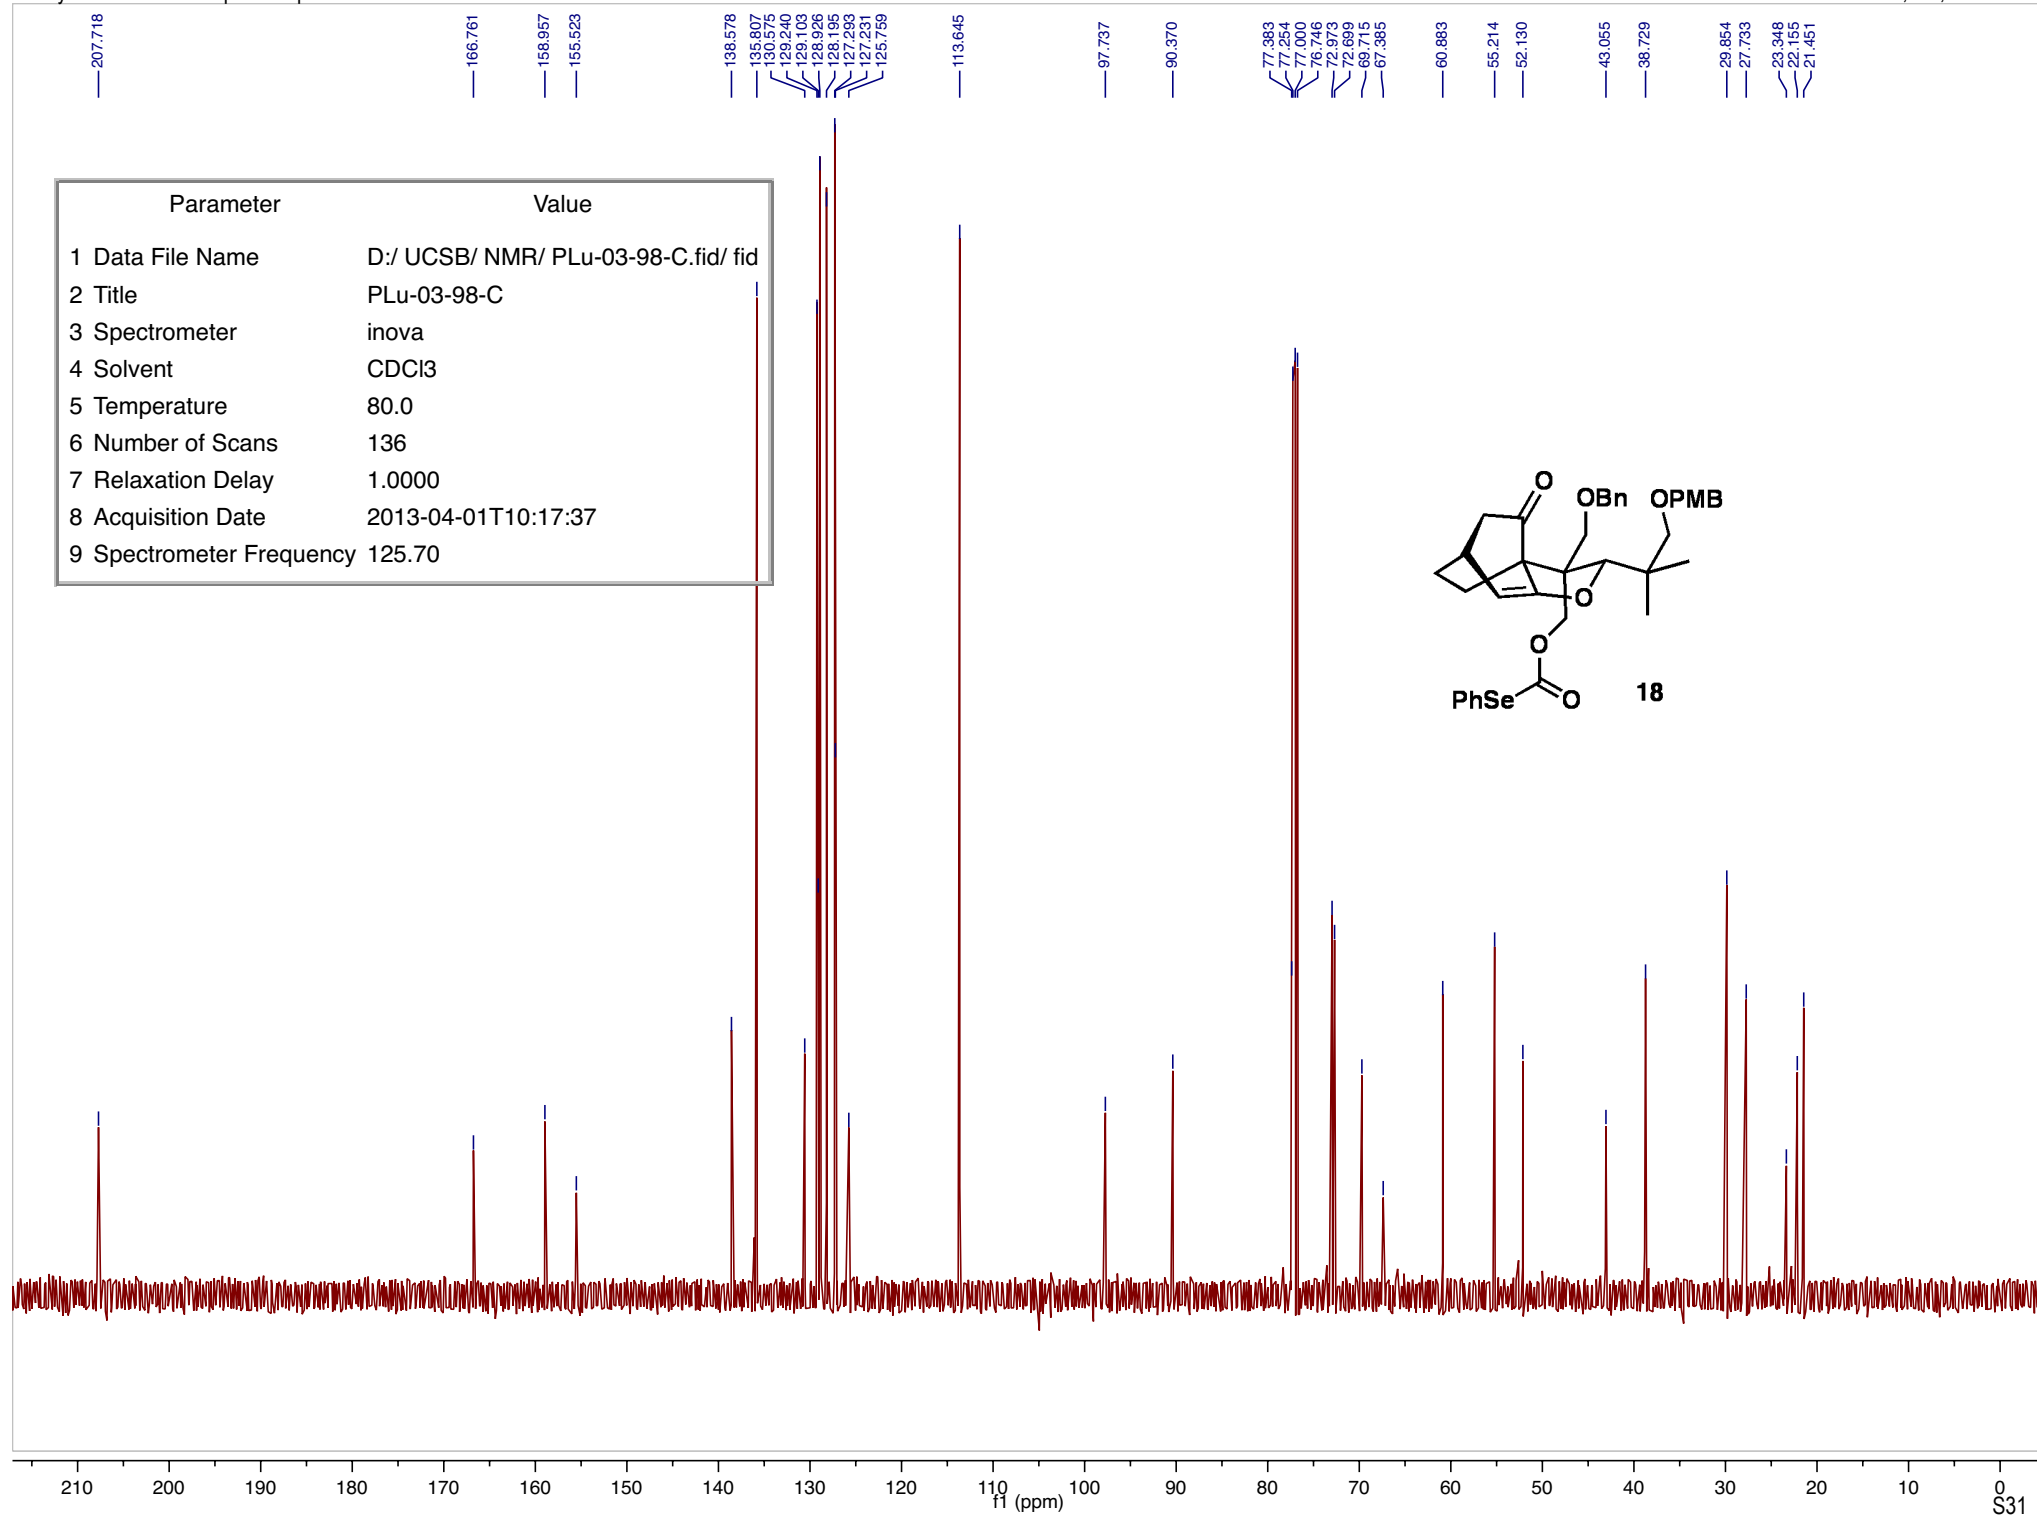

| Parameter                | Value                                |
|--------------------------|--------------------------------------|
| 1 Data File Name         | D:/ UCSB/ NMR/ PLu-03-111-H.fid/ fid |
| 2 Title                  | PLu-03-111-H                         |
| 3 Spectrometer           | inova                                |
| 4 Solvent                | cdcl3                                |
| 5 Temperature            | 25.0                                 |
| 6 Number of Scans        | 20                                   |
| 7 Relaxation Delay       | 4.8000                               |
| 8 Acquisition Date       | 2013-04-08T19:08:49                  |
| 9 Spectrometer Frequency | 599.64                               |

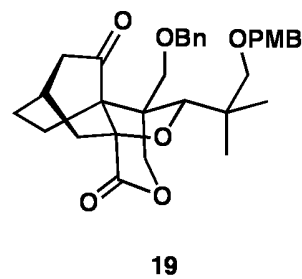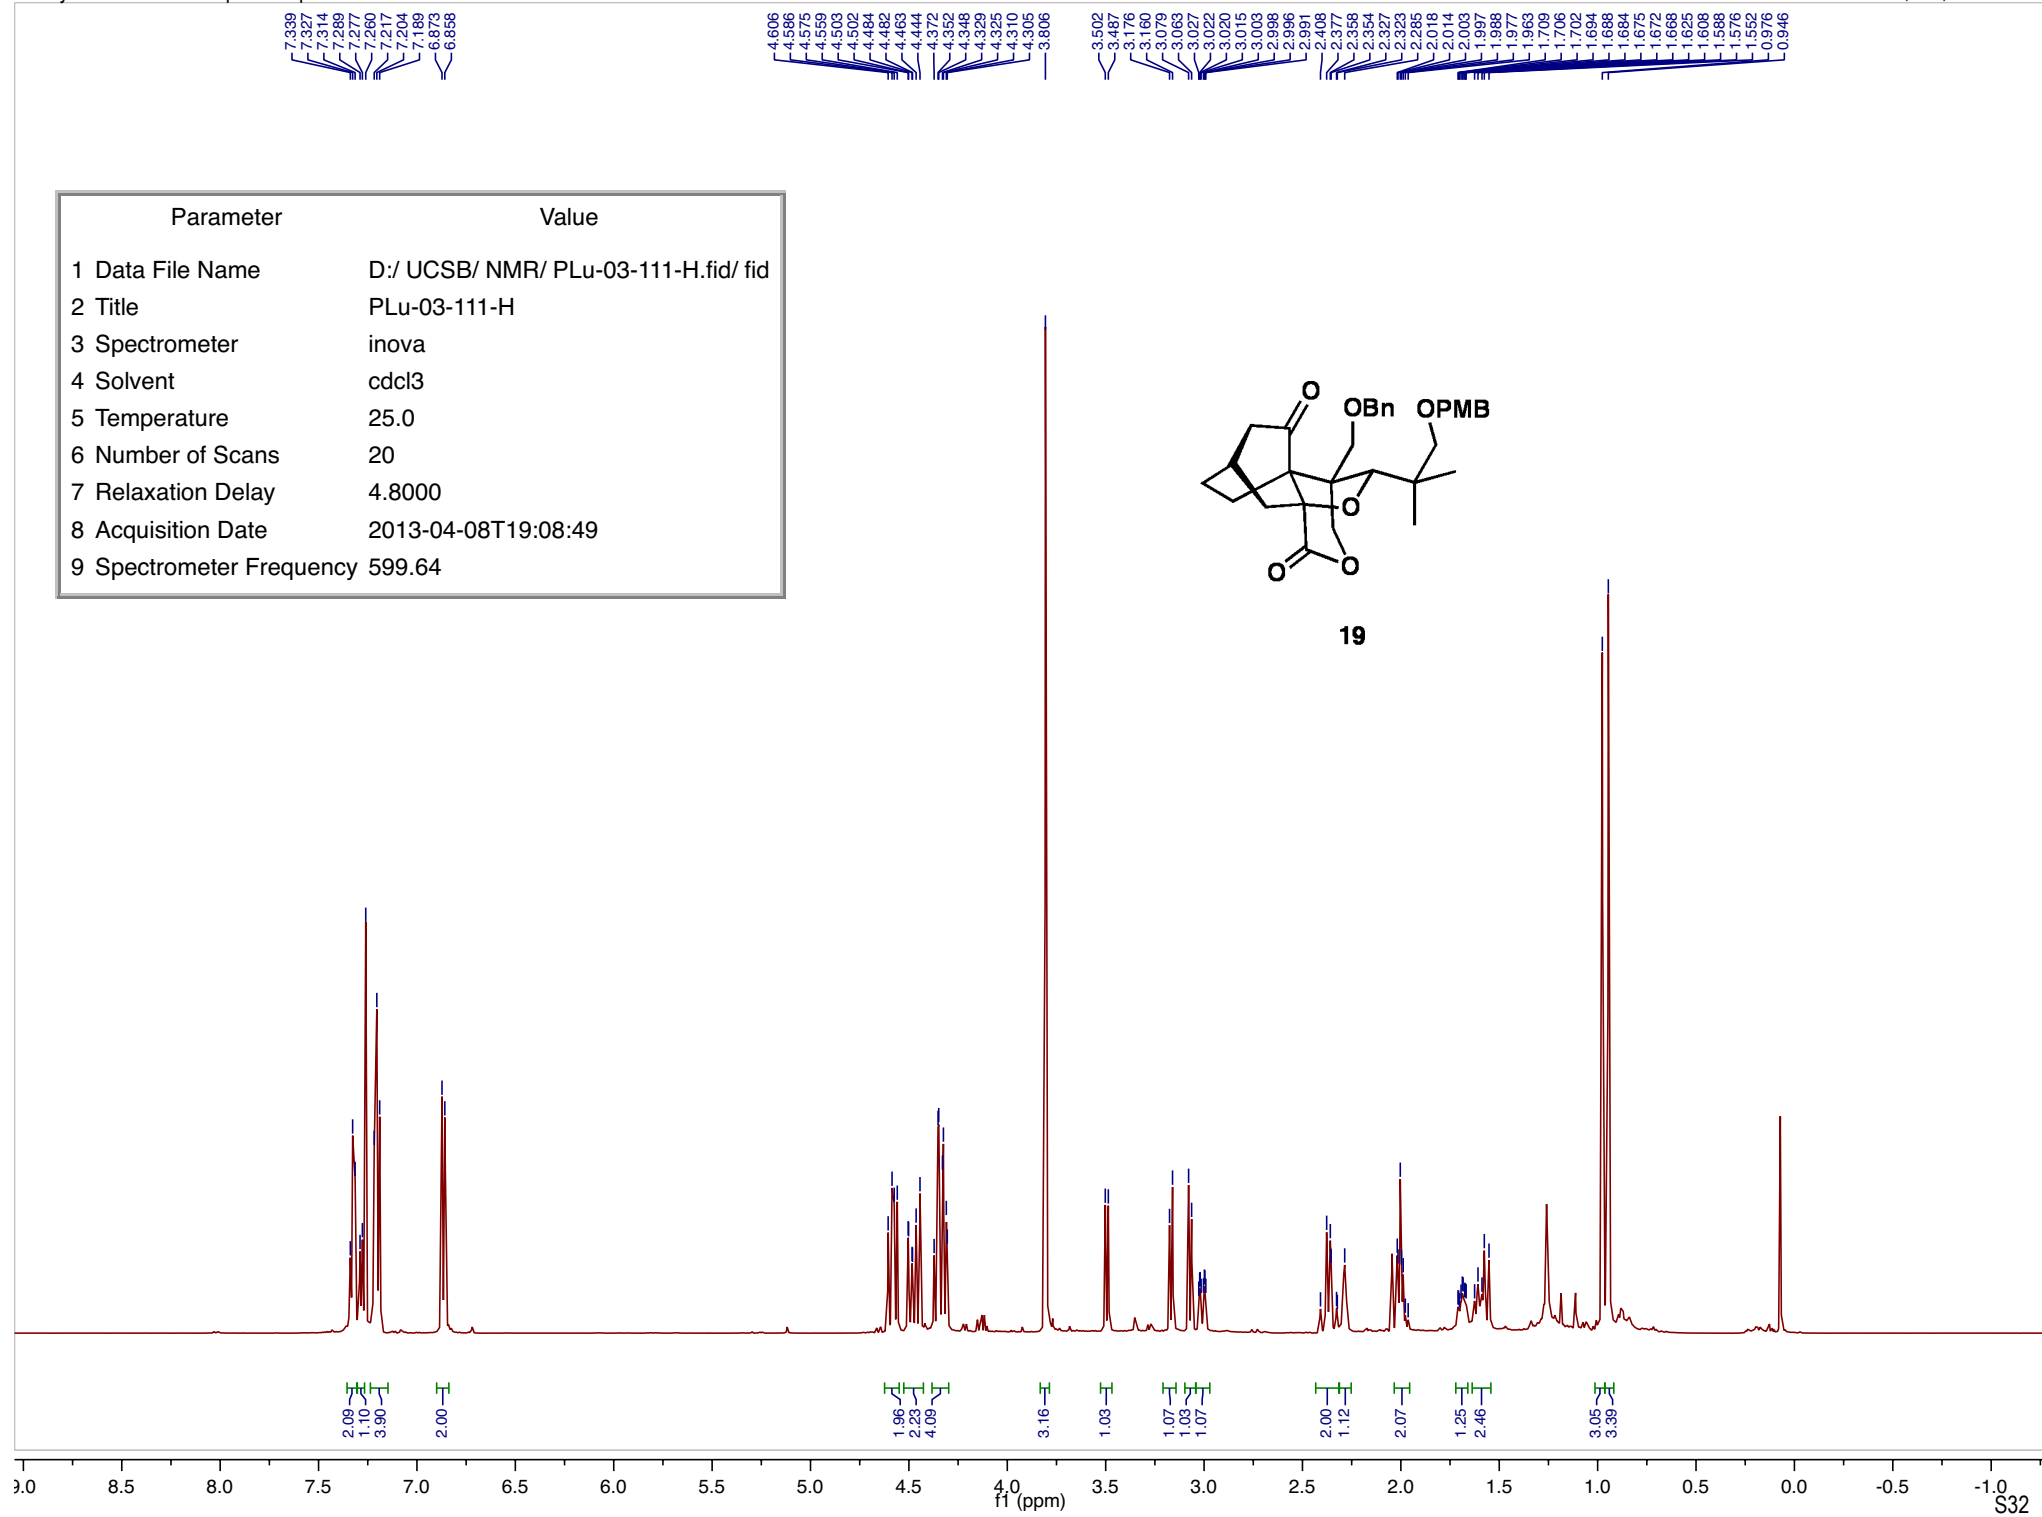



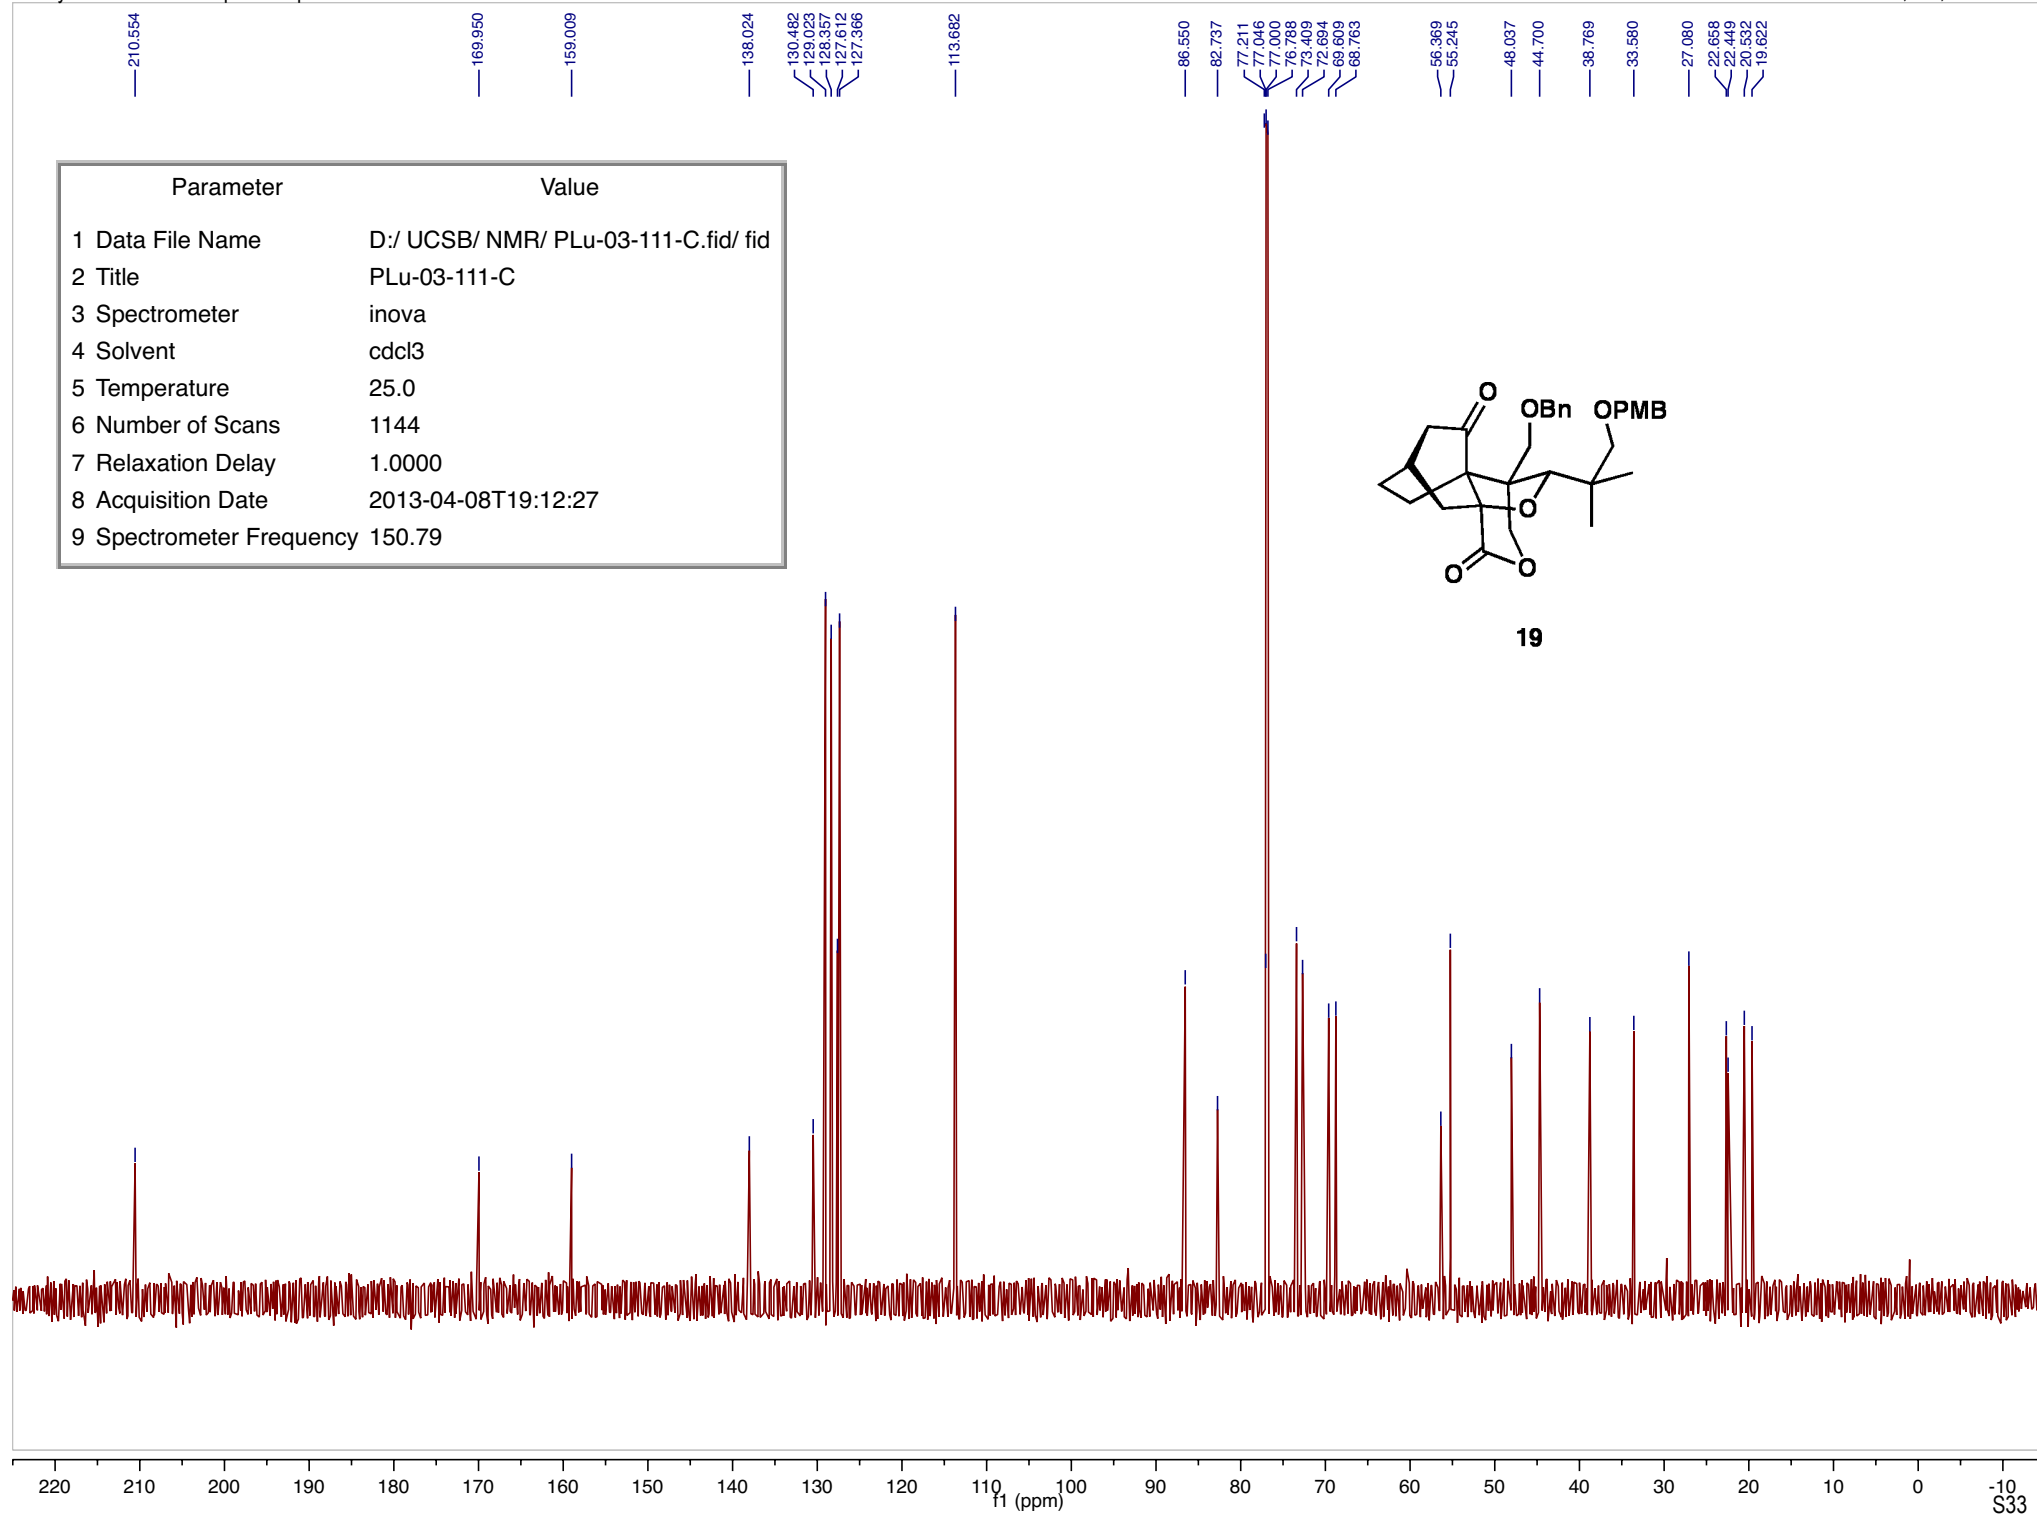

| Parameter              | Value (f2, f1)   |
|------------------------|------------------|
| Title                  | PLu-03-61-cosy   |
| Solvent                | cdcl3            |
| Temperature            | 25.0             |
| Spectrometer Frequency | (599.63, 599.63) |

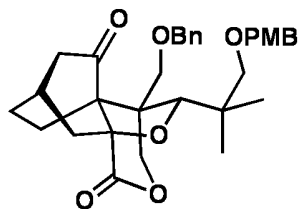

19

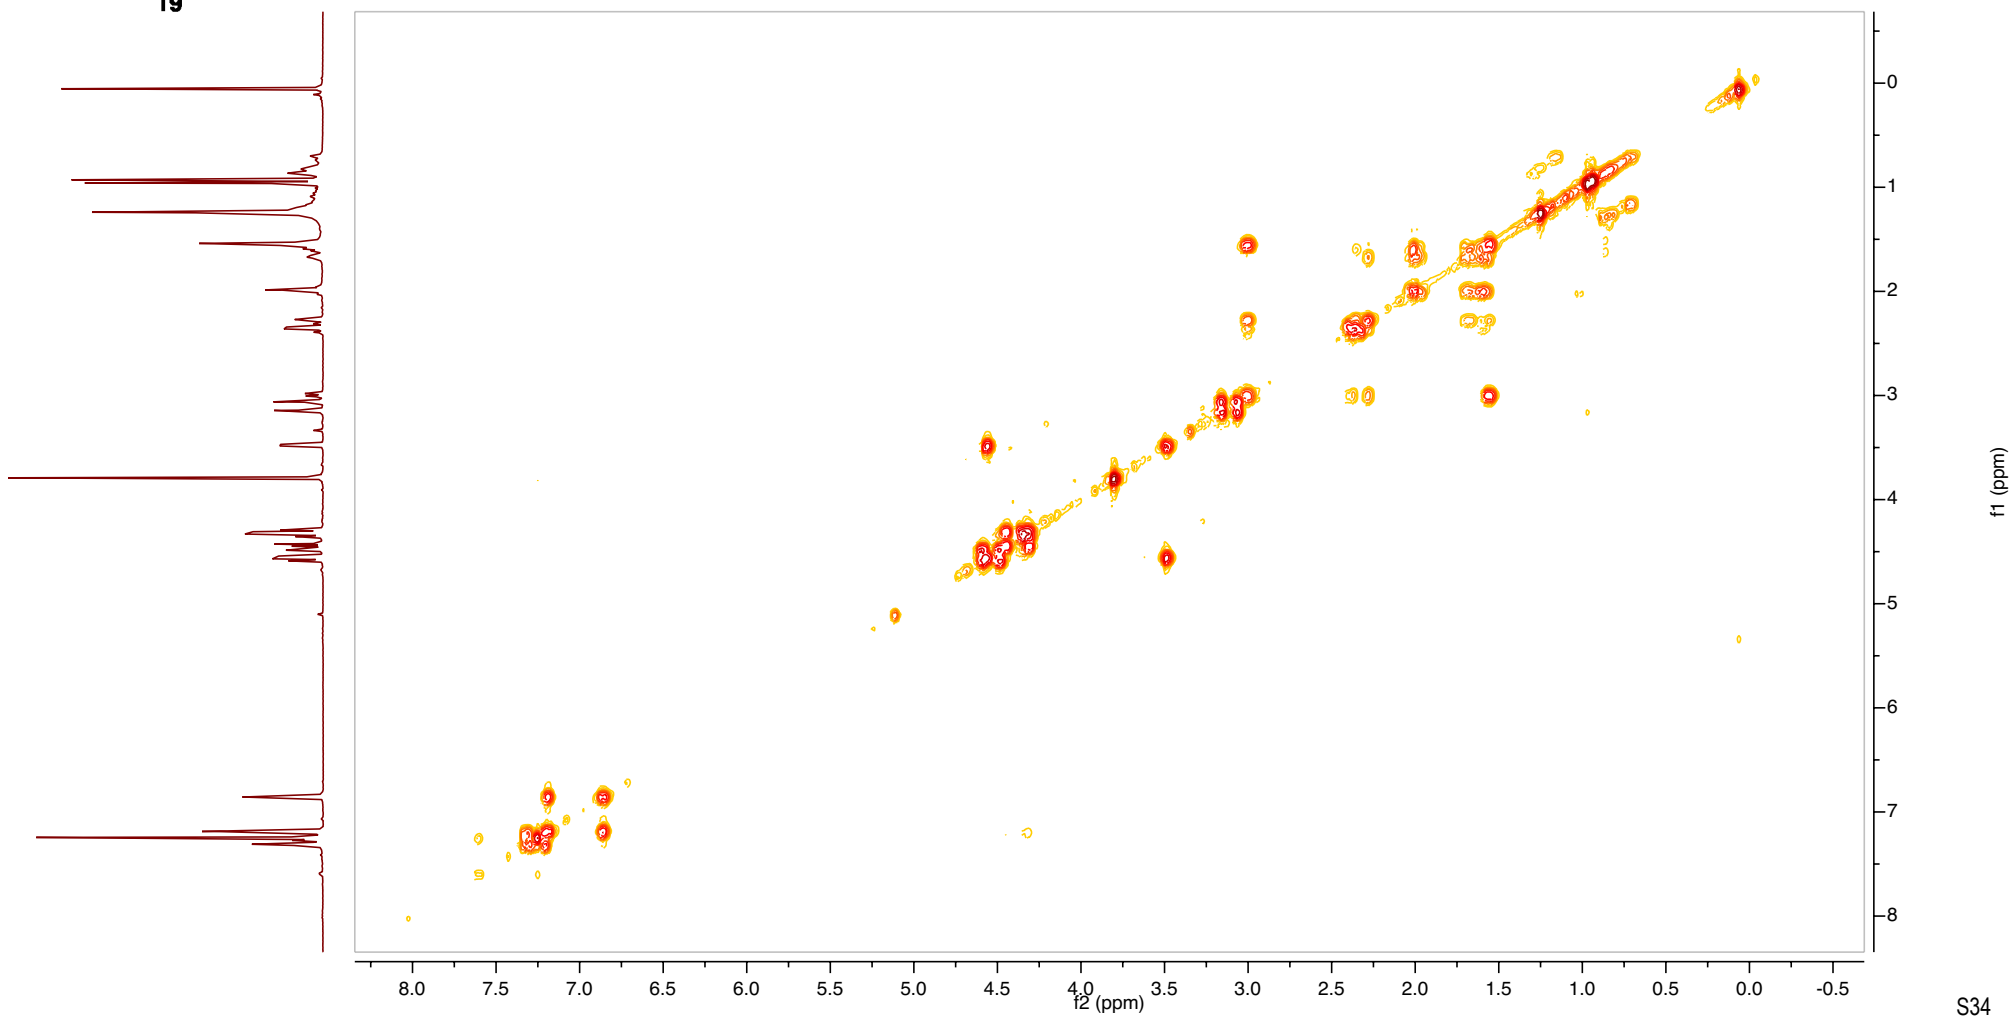

| Parameter              | Value (f2, f1)   |
|------------------------|------------------|
| Title                  | PLu-03-61-cosy   |
| Solvent                | cdcl3            |
| Temperature            | 25.0             |
| Spectrometer Frequency | (599.63, 599.63) |

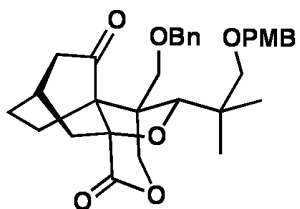**19**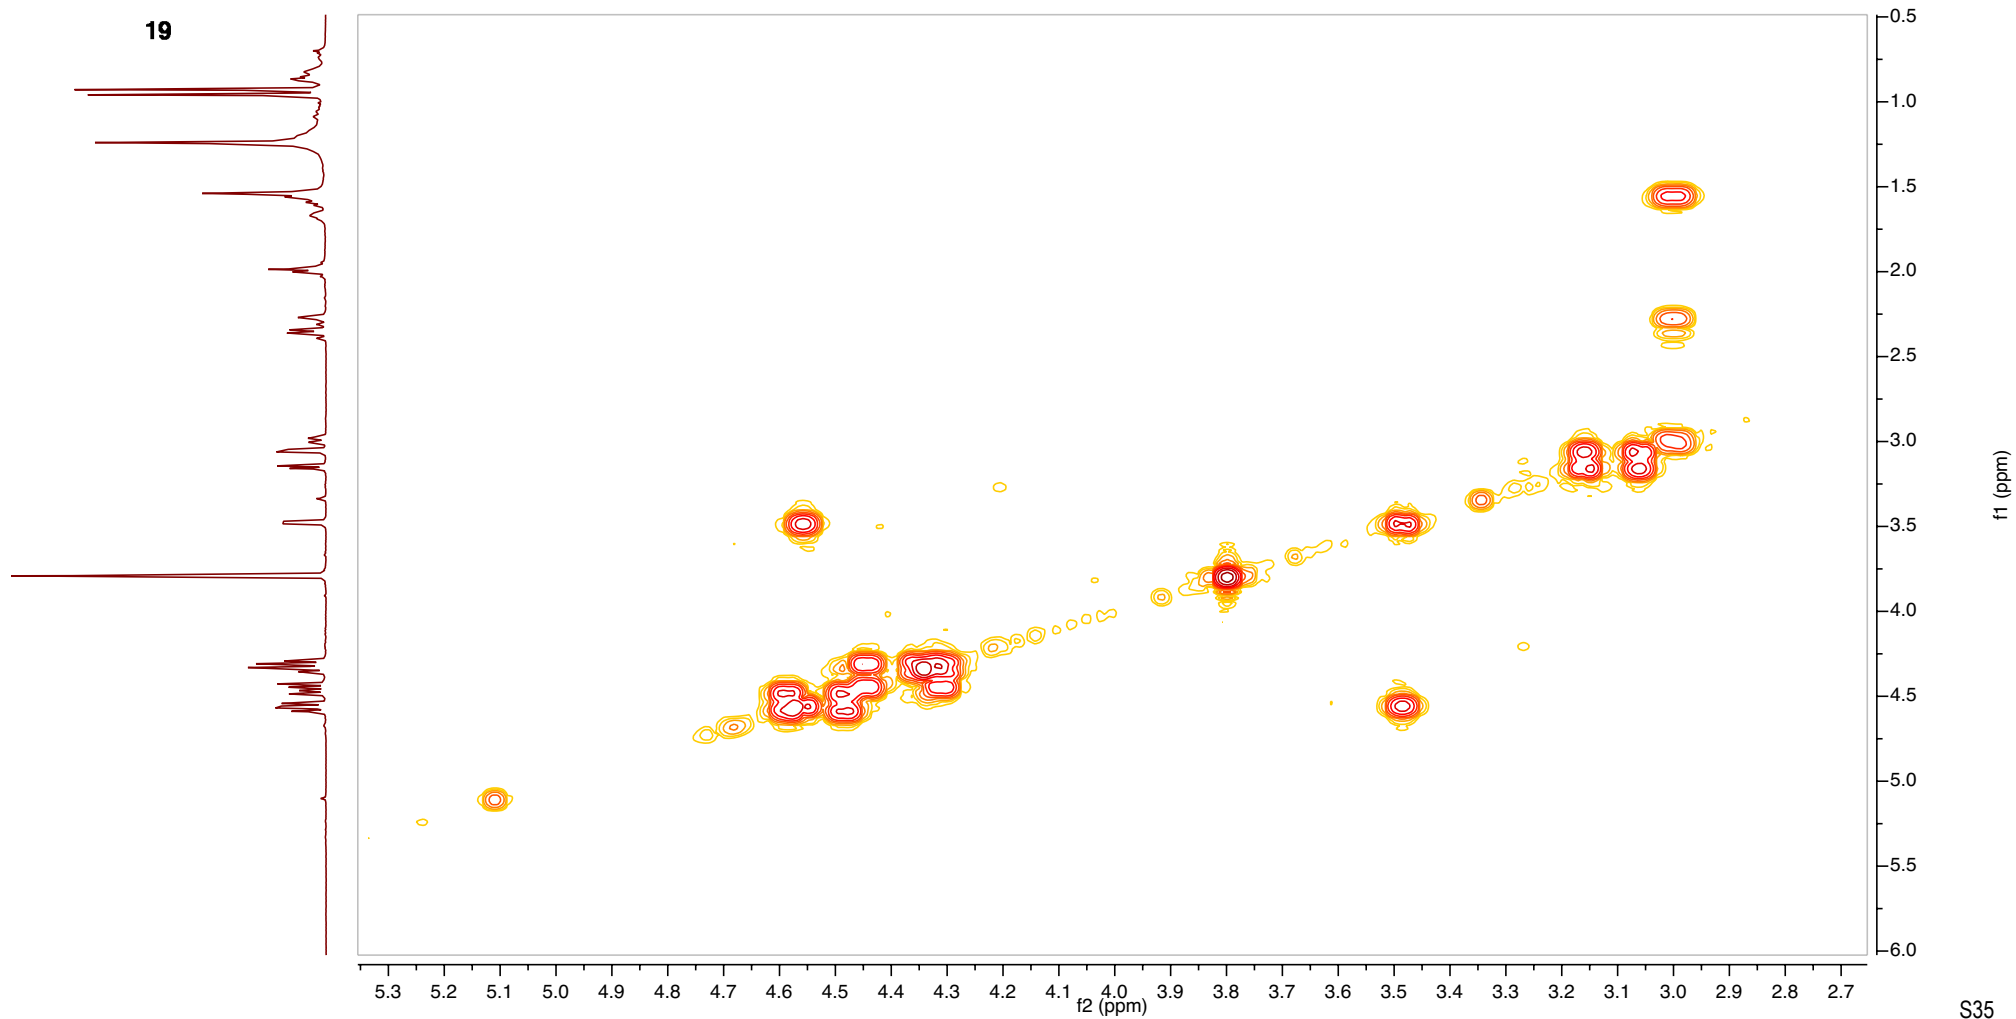

| Parameter              | Value (f2, f1)   |
|------------------------|------------------|
| Title                  | PLu-03-61-cosy   |
| Solvent                | cdcl3            |
| Temperature            | 25.0             |
| Spectrometer Frequency | (599.63, 599.63) |

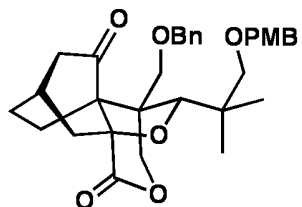

19

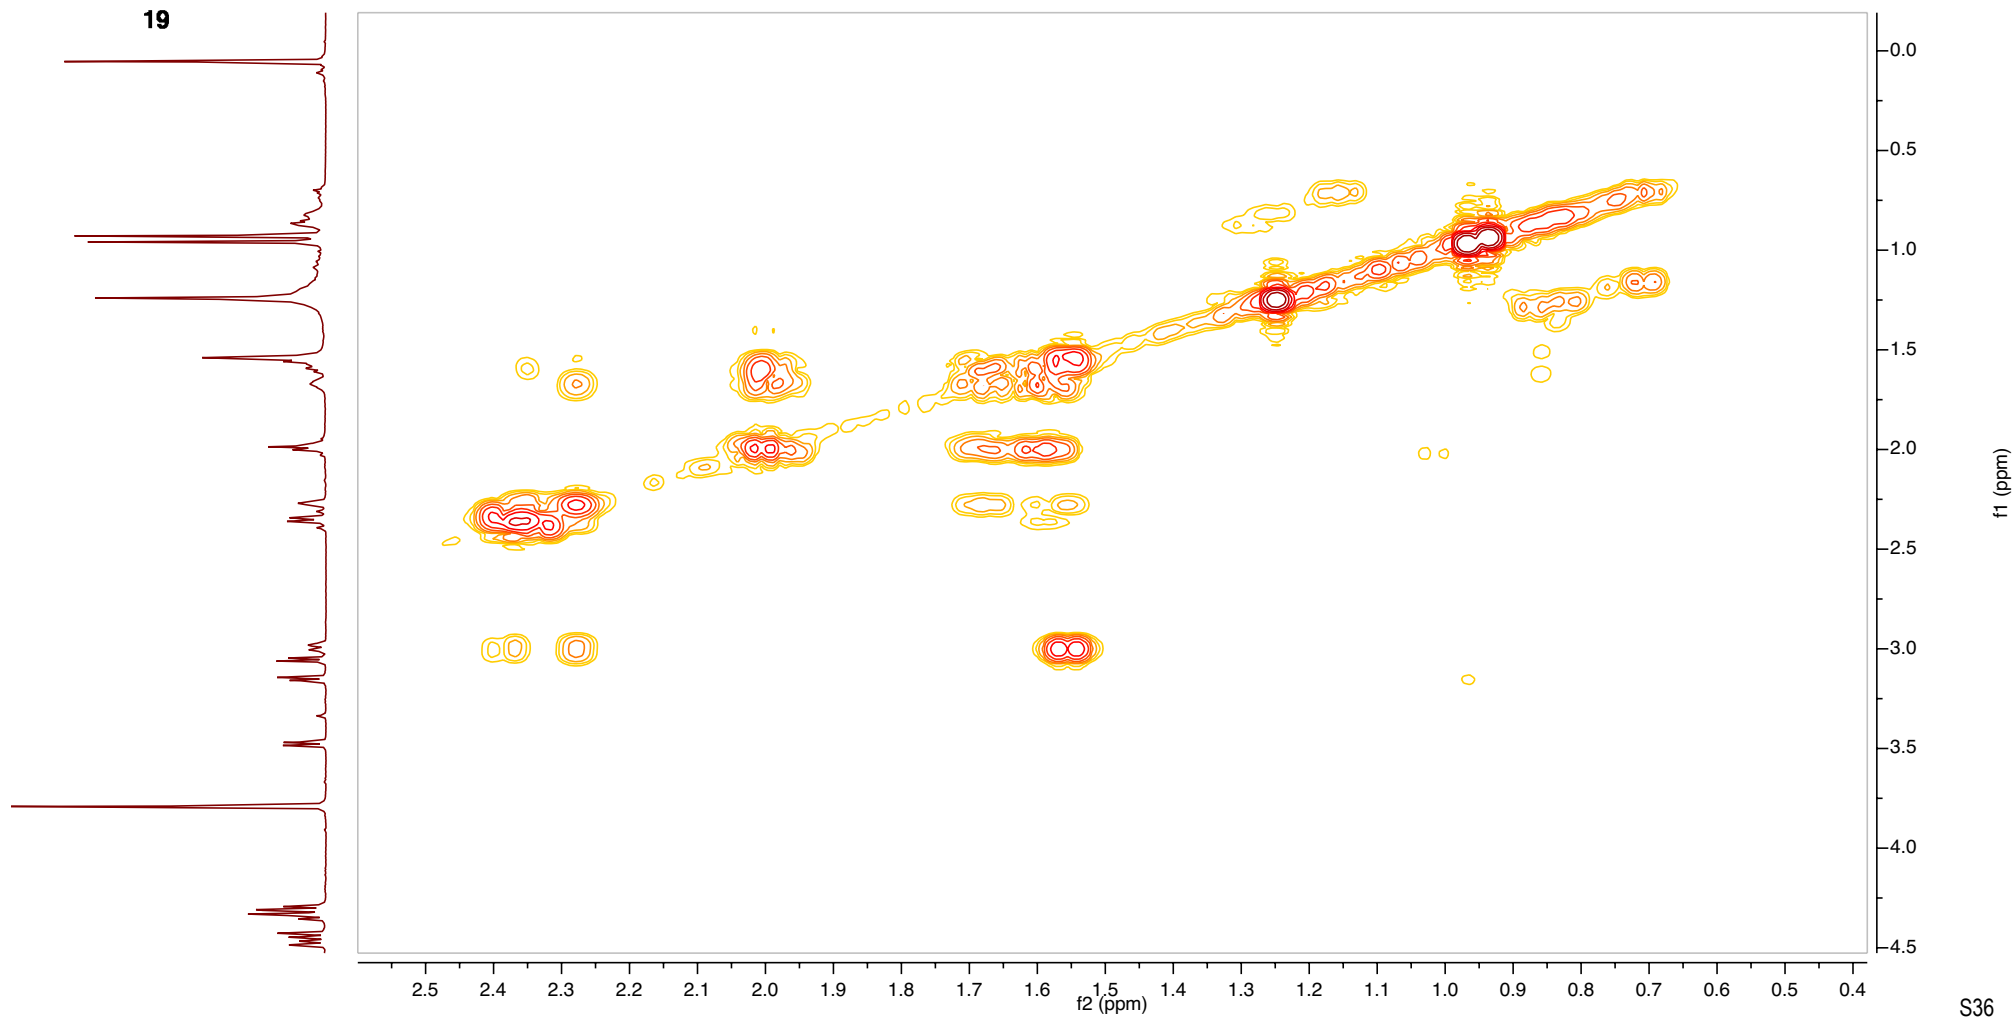

| Parameter              | Value (f2, f1)   |
|------------------------|------------------|
| Title                  | PLu-03-hsqc      |
| Solvent                | cdcl3            |
| Temperature            | 25.0             |
| Spectrometer Frequency | (599.63, 150.79) |

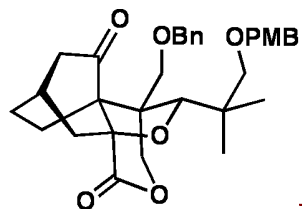**19**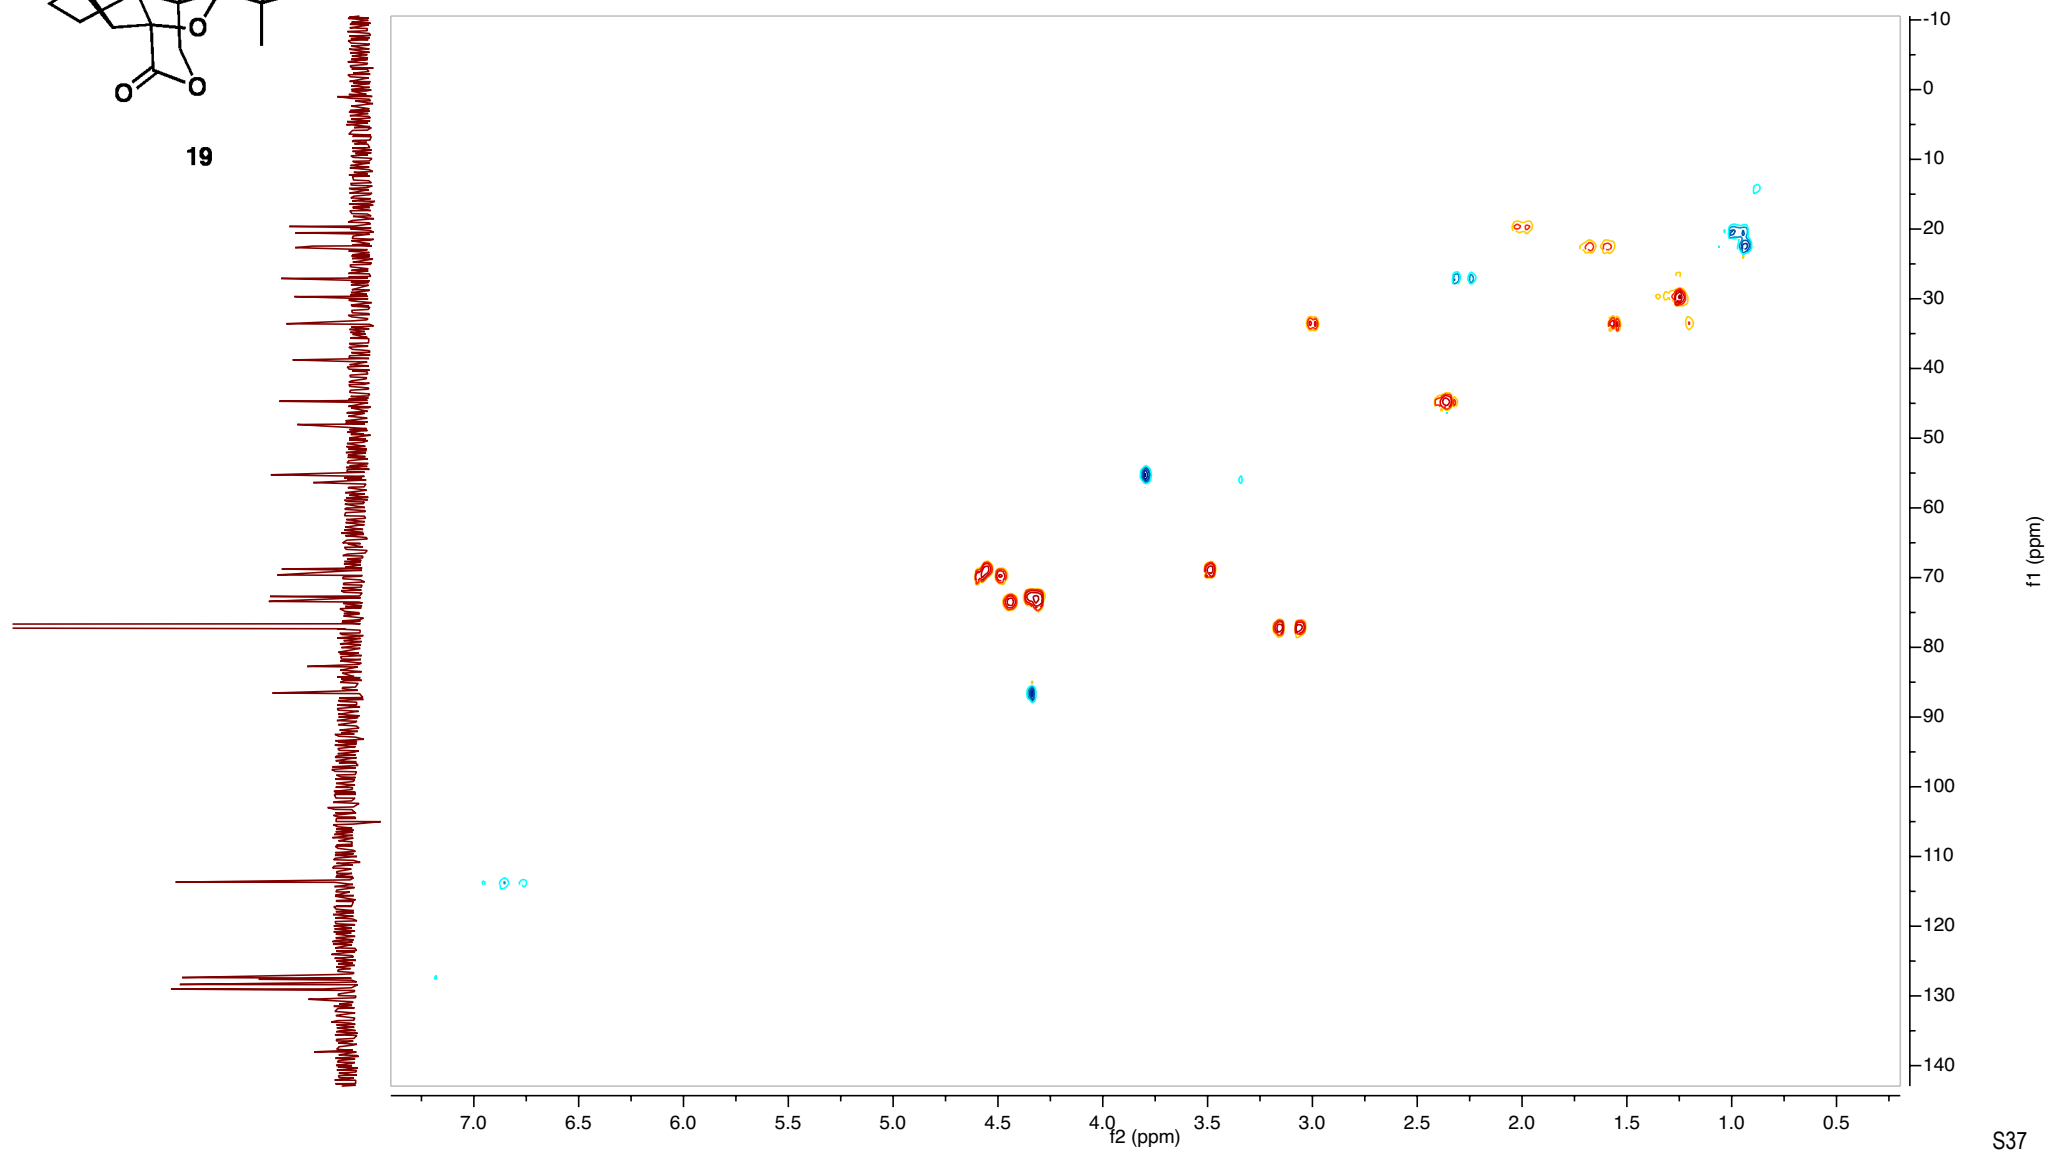

| Parameter              | Value (f2, f1)   |
|------------------------|------------------|
| Title                  | PLu-03-hsqc      |
| Solvent                | cdcl3            |
| Temperature            | 25.0             |
| Spectrometer Frequency | (599.63, 150.79) |

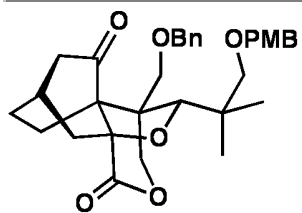**19**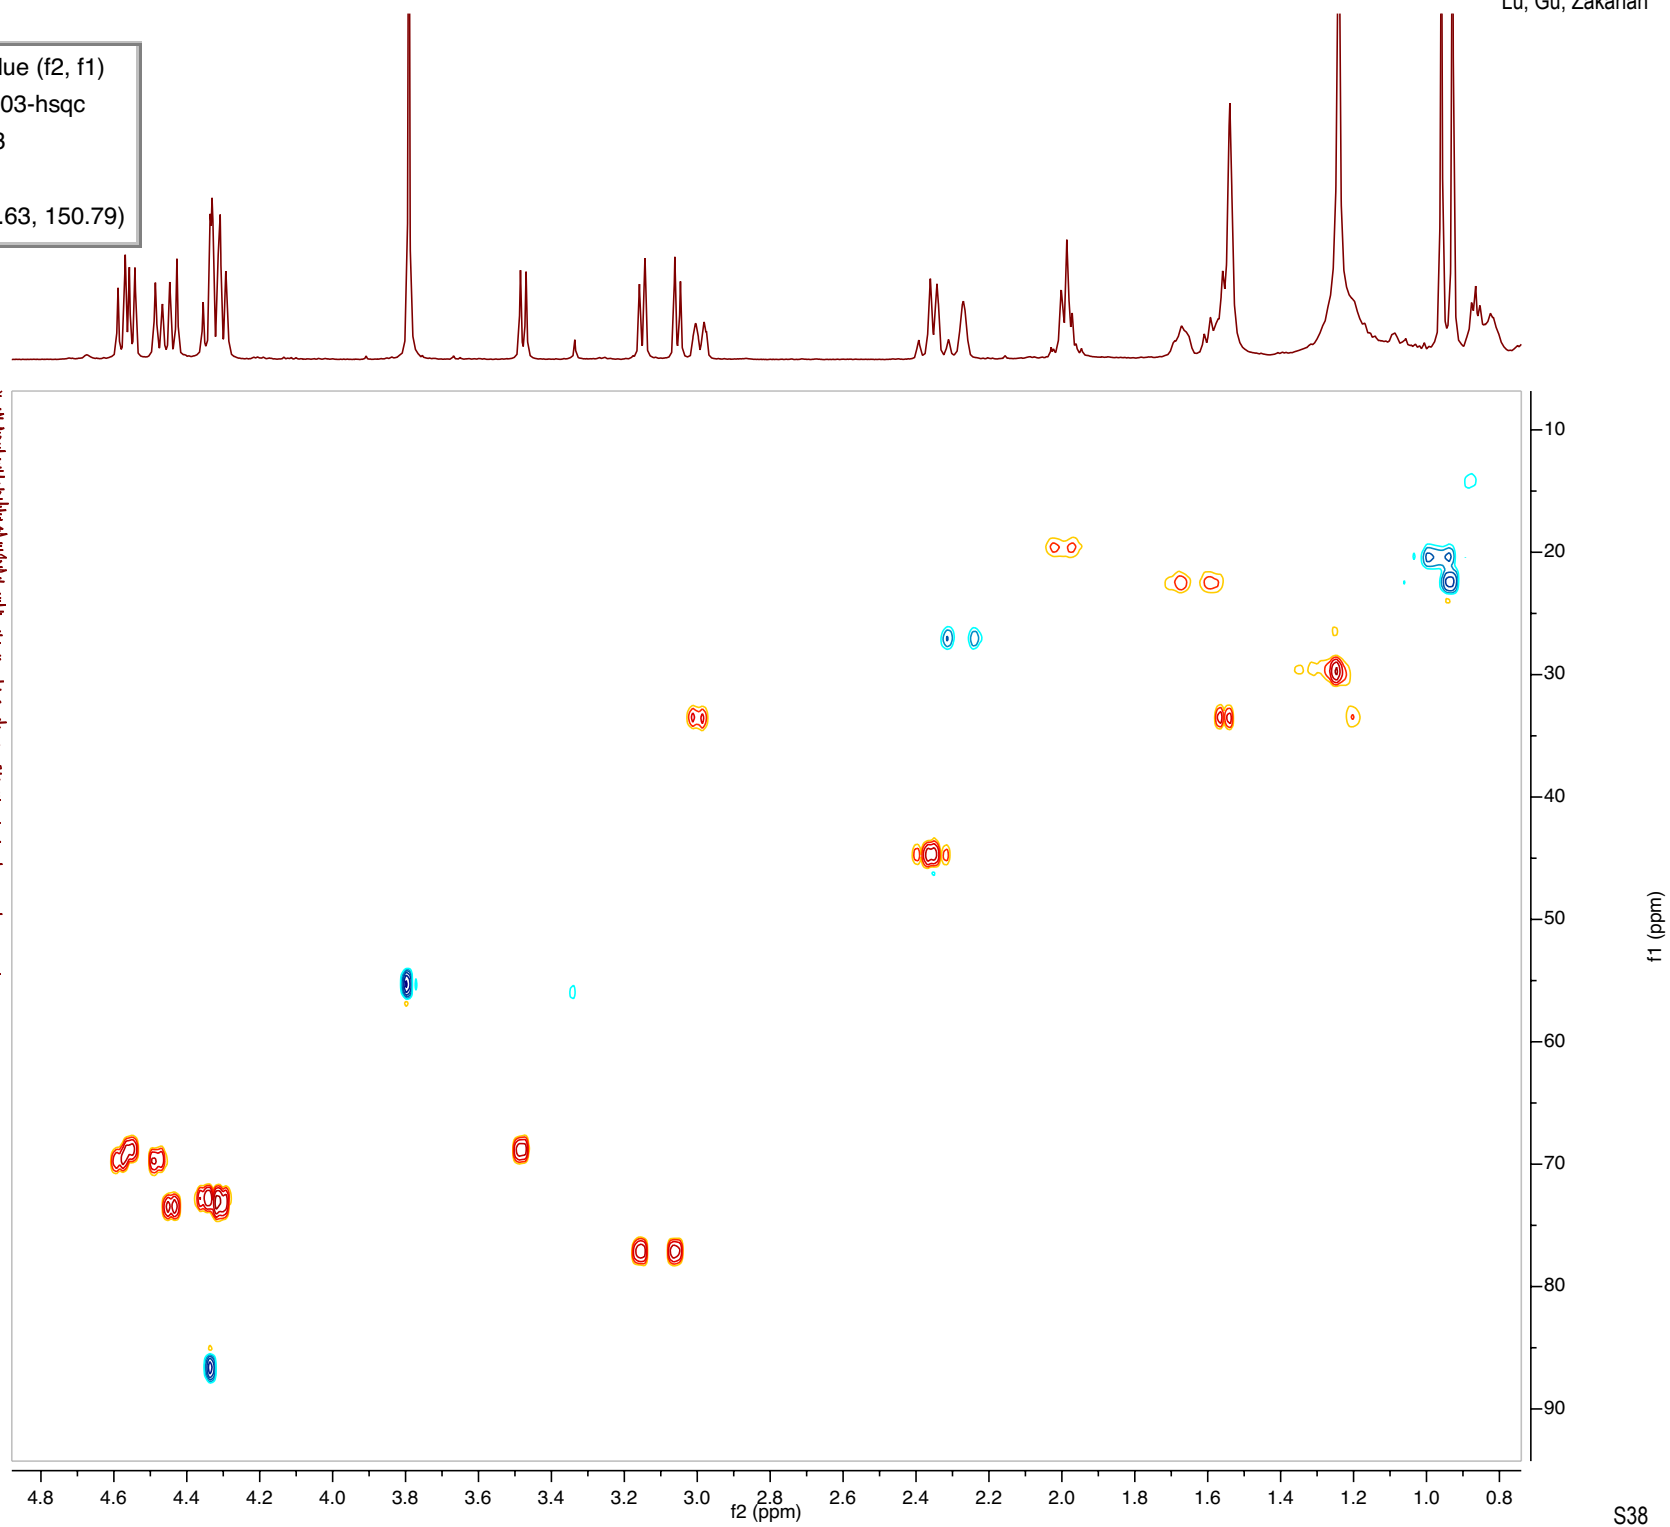

| Parameter              | Value (f2, f1)   |
|------------------------|------------------|
| Title                  | PLu-03-61-hmbc   |
| Solvent                | cdcl3            |
| Temperature            | 25.0             |
| Spectrometer Frequency | (599.63, 150.79) |

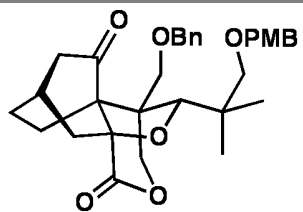

19

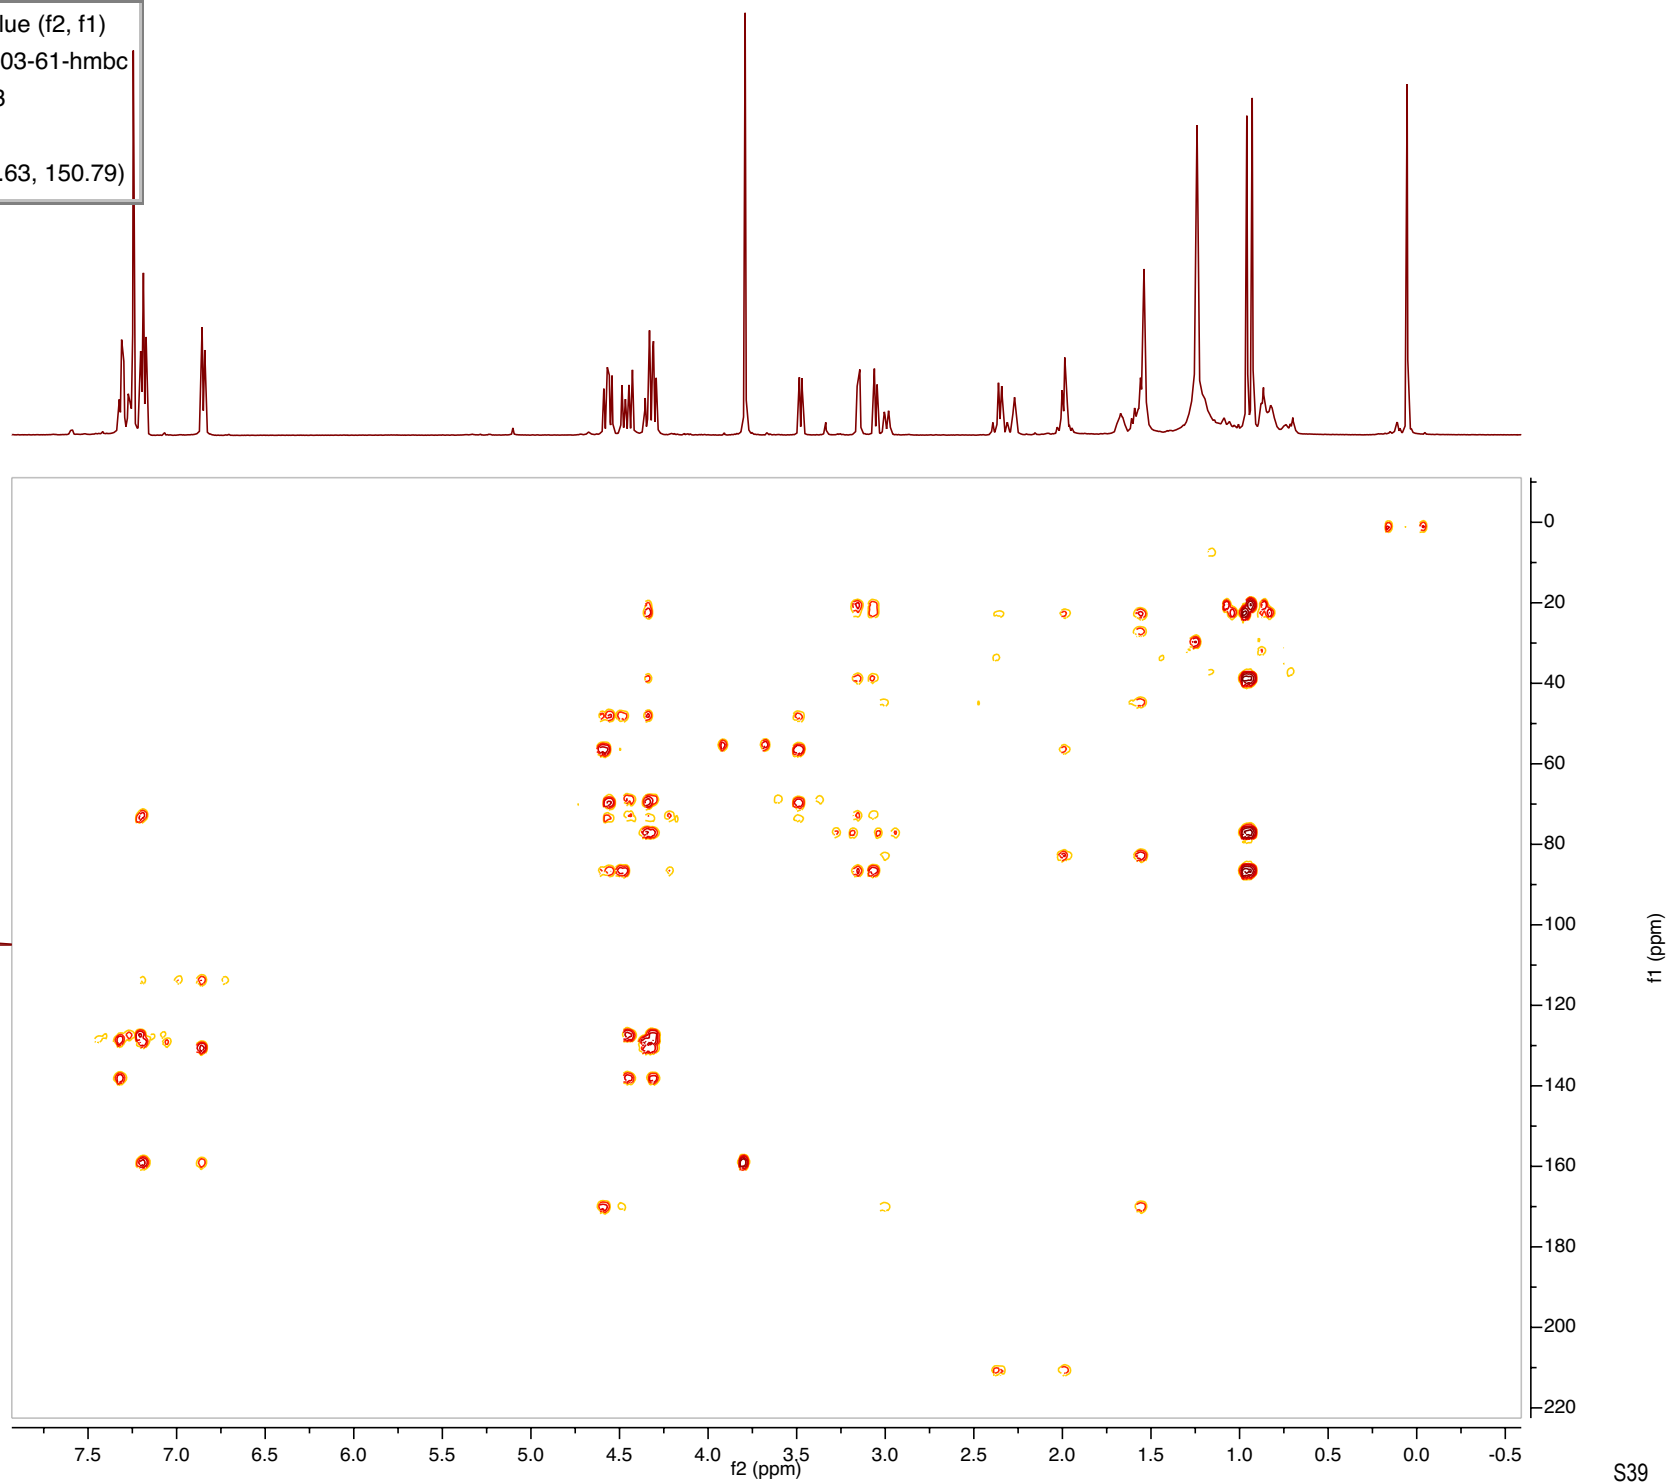

| Parameter              | Value (f2, f1)   |
|------------------------|------------------|
| Title                  | PLu-03-61-hmbc   |
| Solvent                | cdcl3            |
| Temperature            | 25.0             |
| Spectrometer Frequency | (599.63, 150.79) |

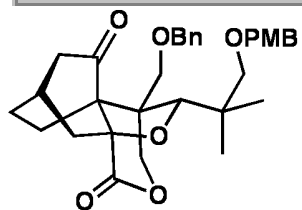**19**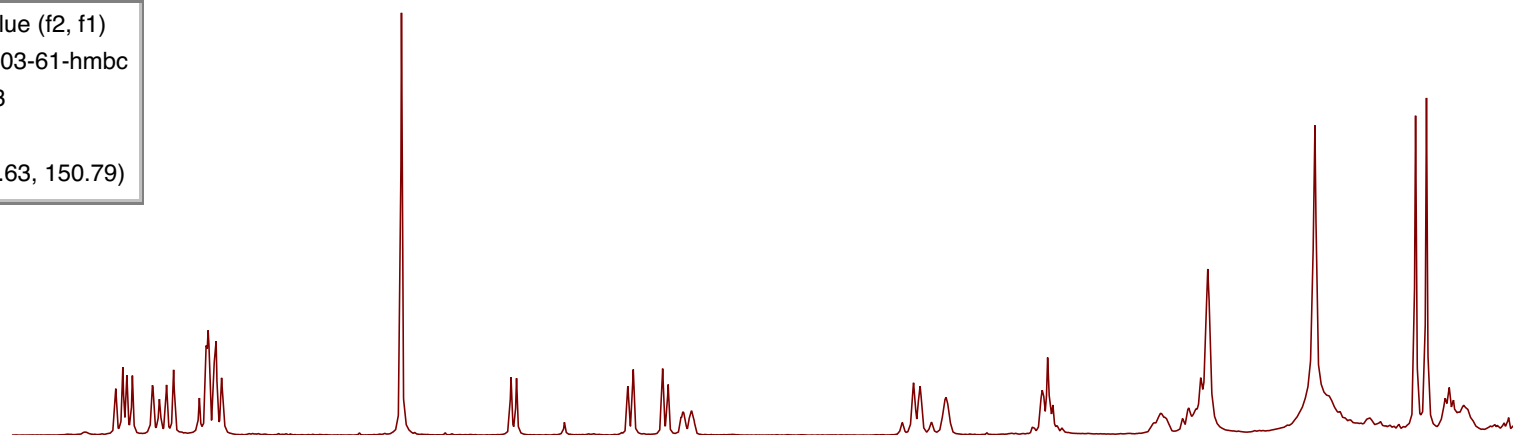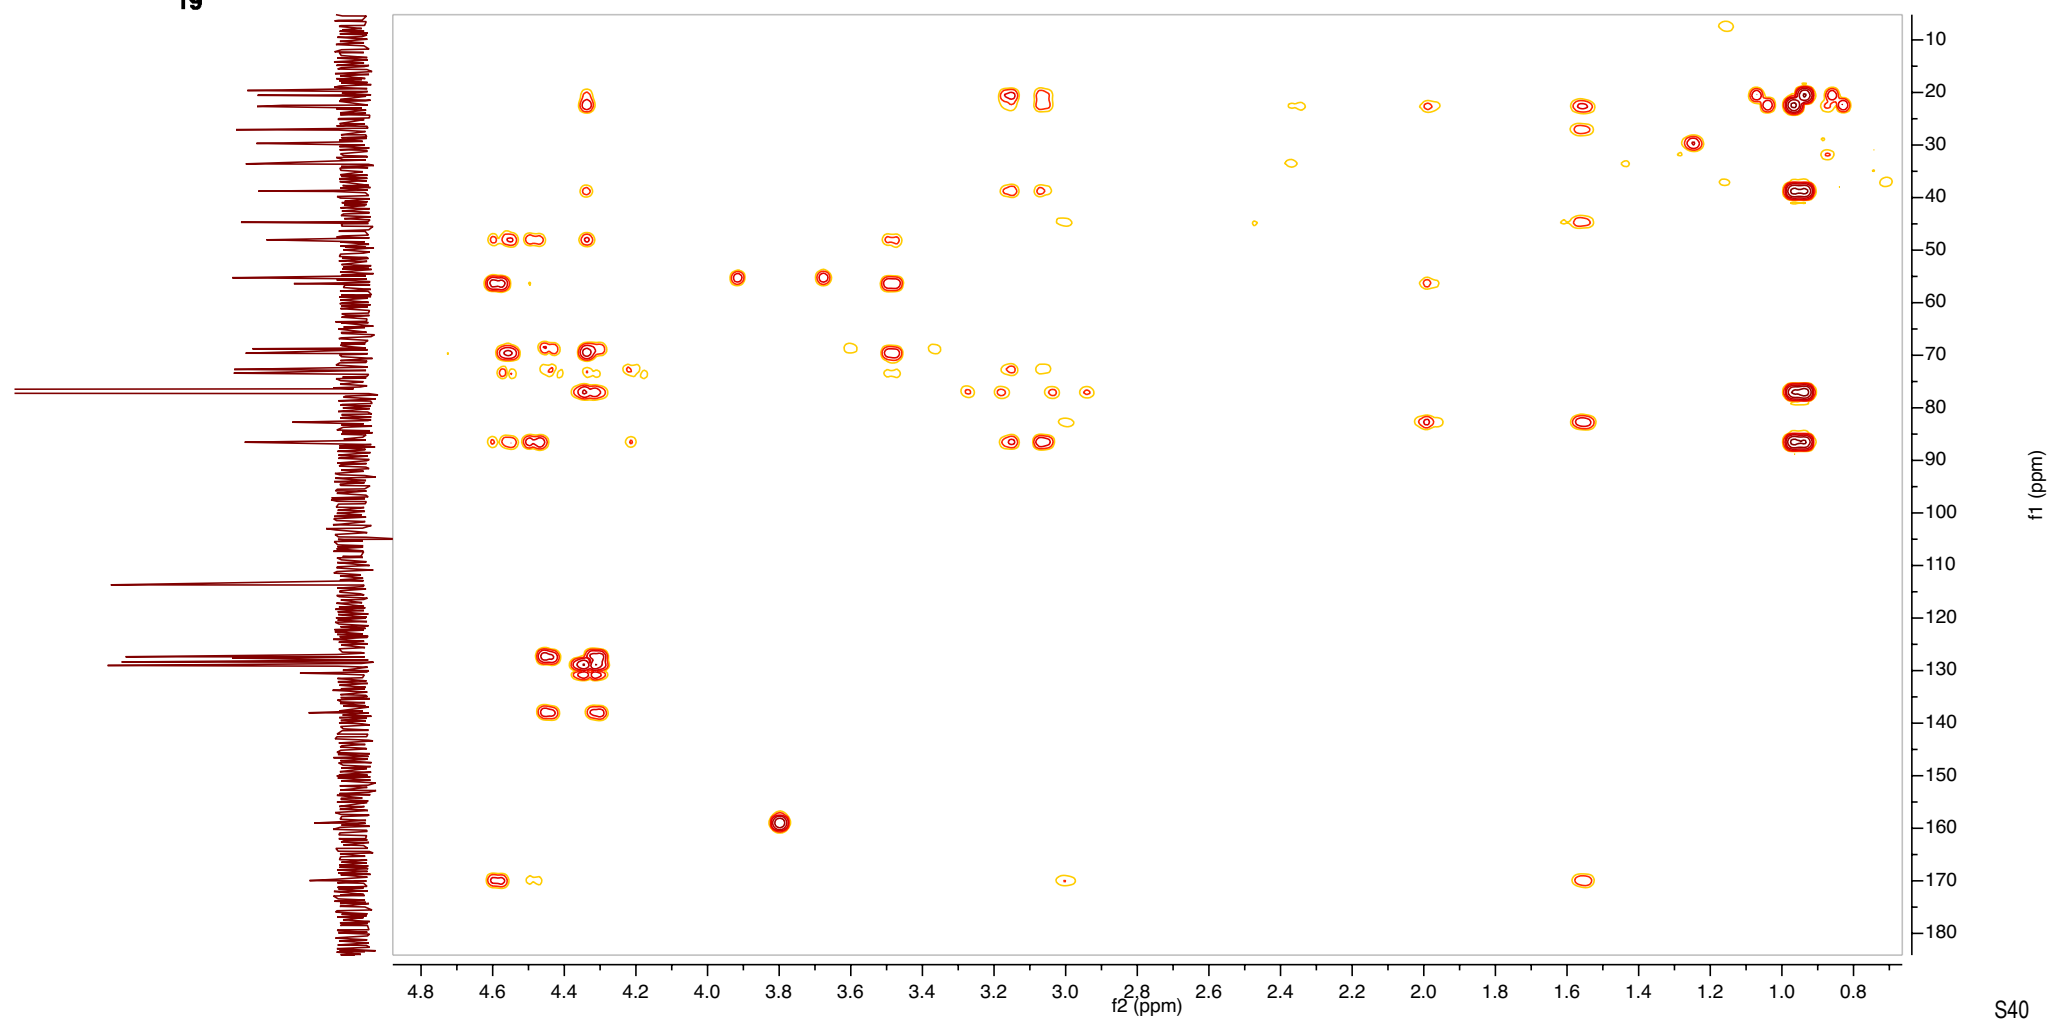



| Parameter              | Value (f2, f1)   |
|------------------------|------------------|
| Title                  | PLu-03-61-NOESY  |
| Solvent                | cdcl3            |
| Temperature            | 25.0             |
| Spectrometer Frequency | (599.63, 599.63) |

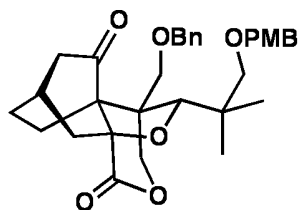**19**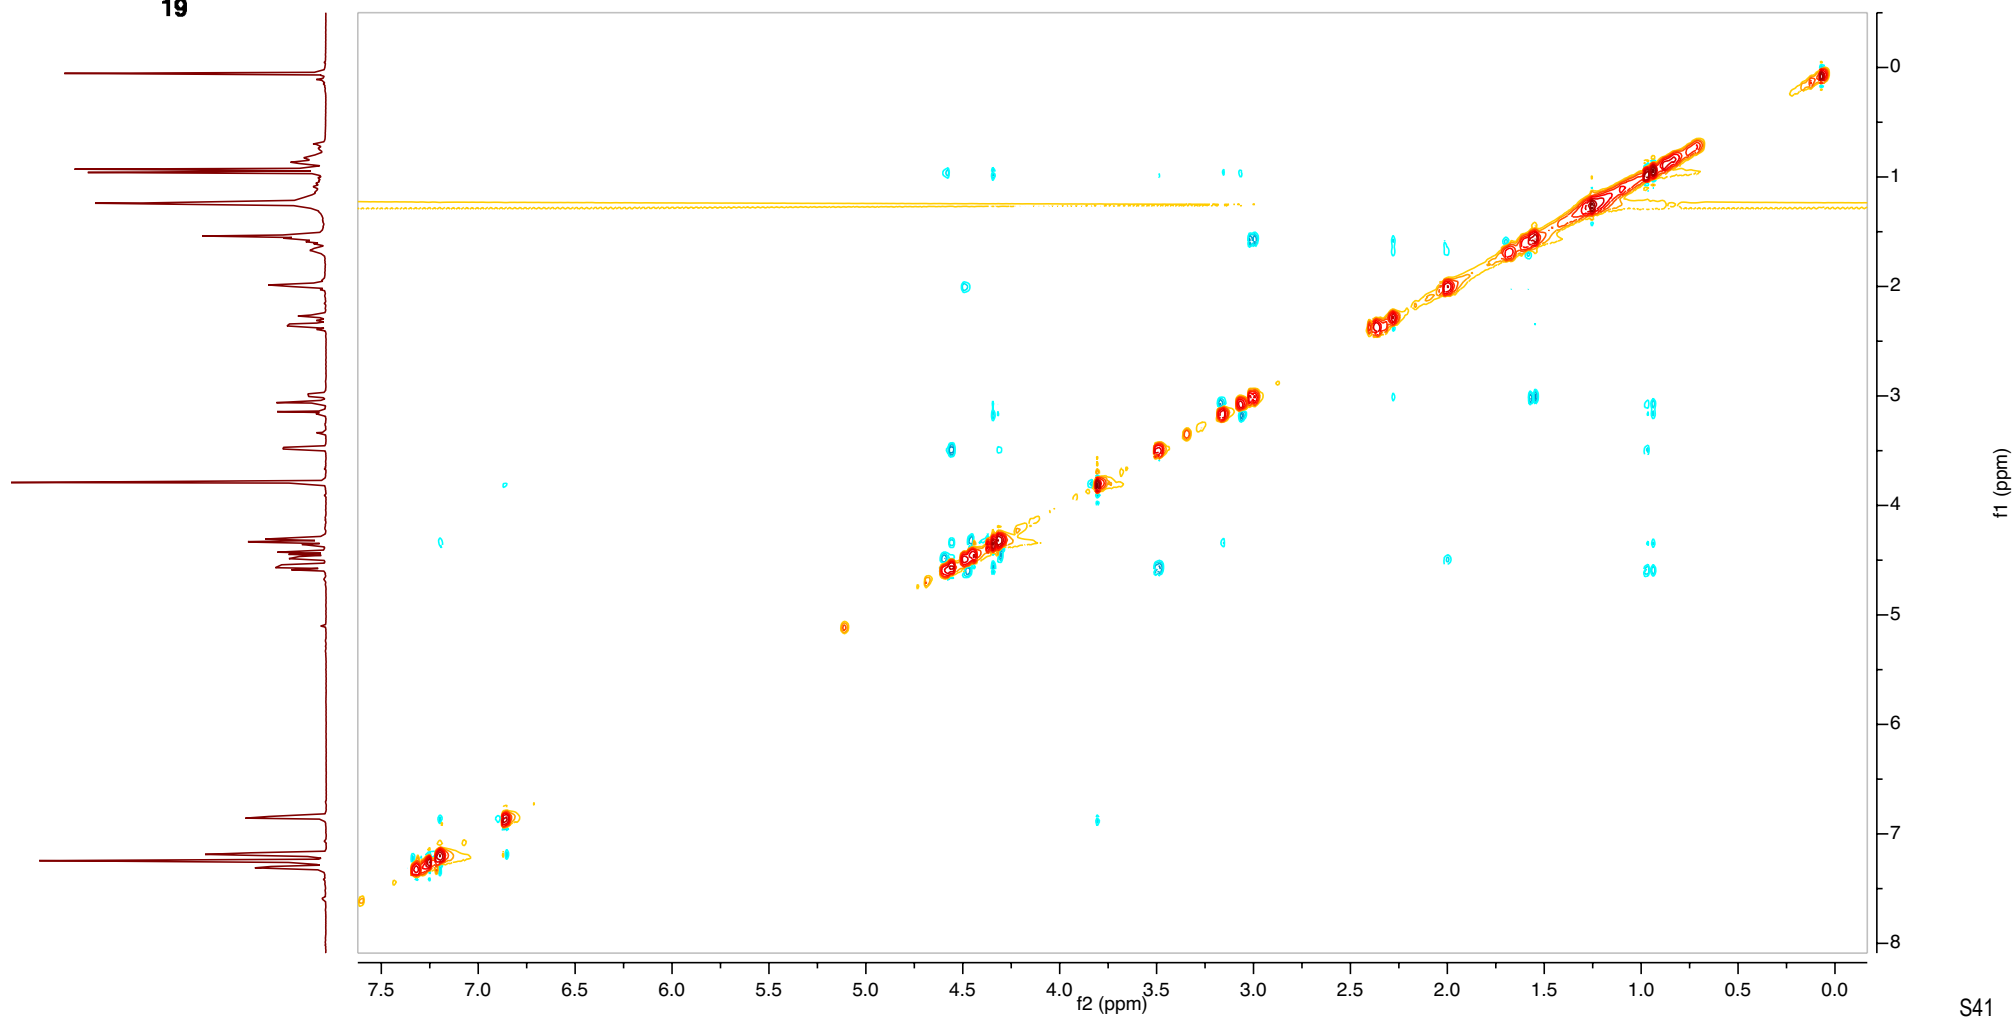

| Parameter              | Value (f2, f1)   |
|------------------------|------------------|
| Title                  | PLu-03-61-NOESY  |
| Solvent                | cdcl3            |
| Temperature            | 25.0             |
| Spectrometer Frequency | (599.63, 599.63) |

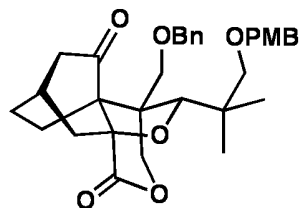**19**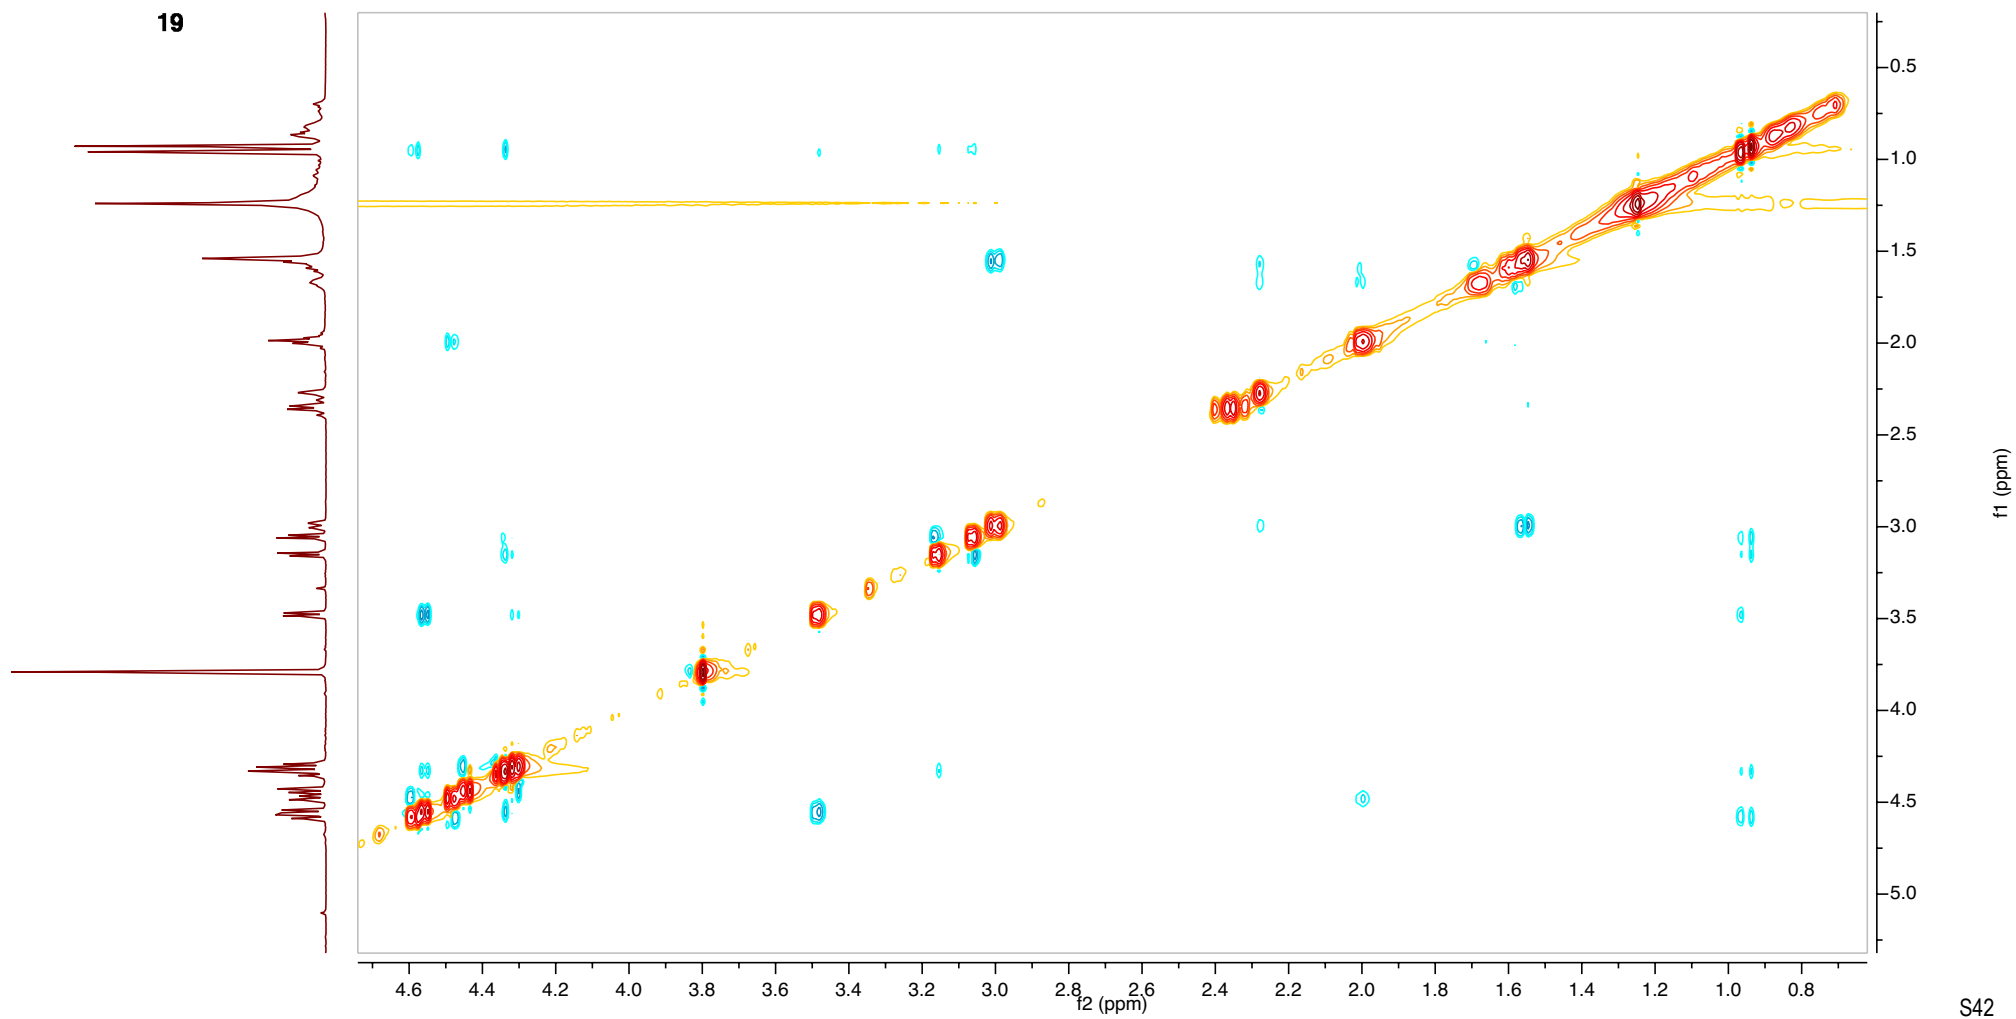

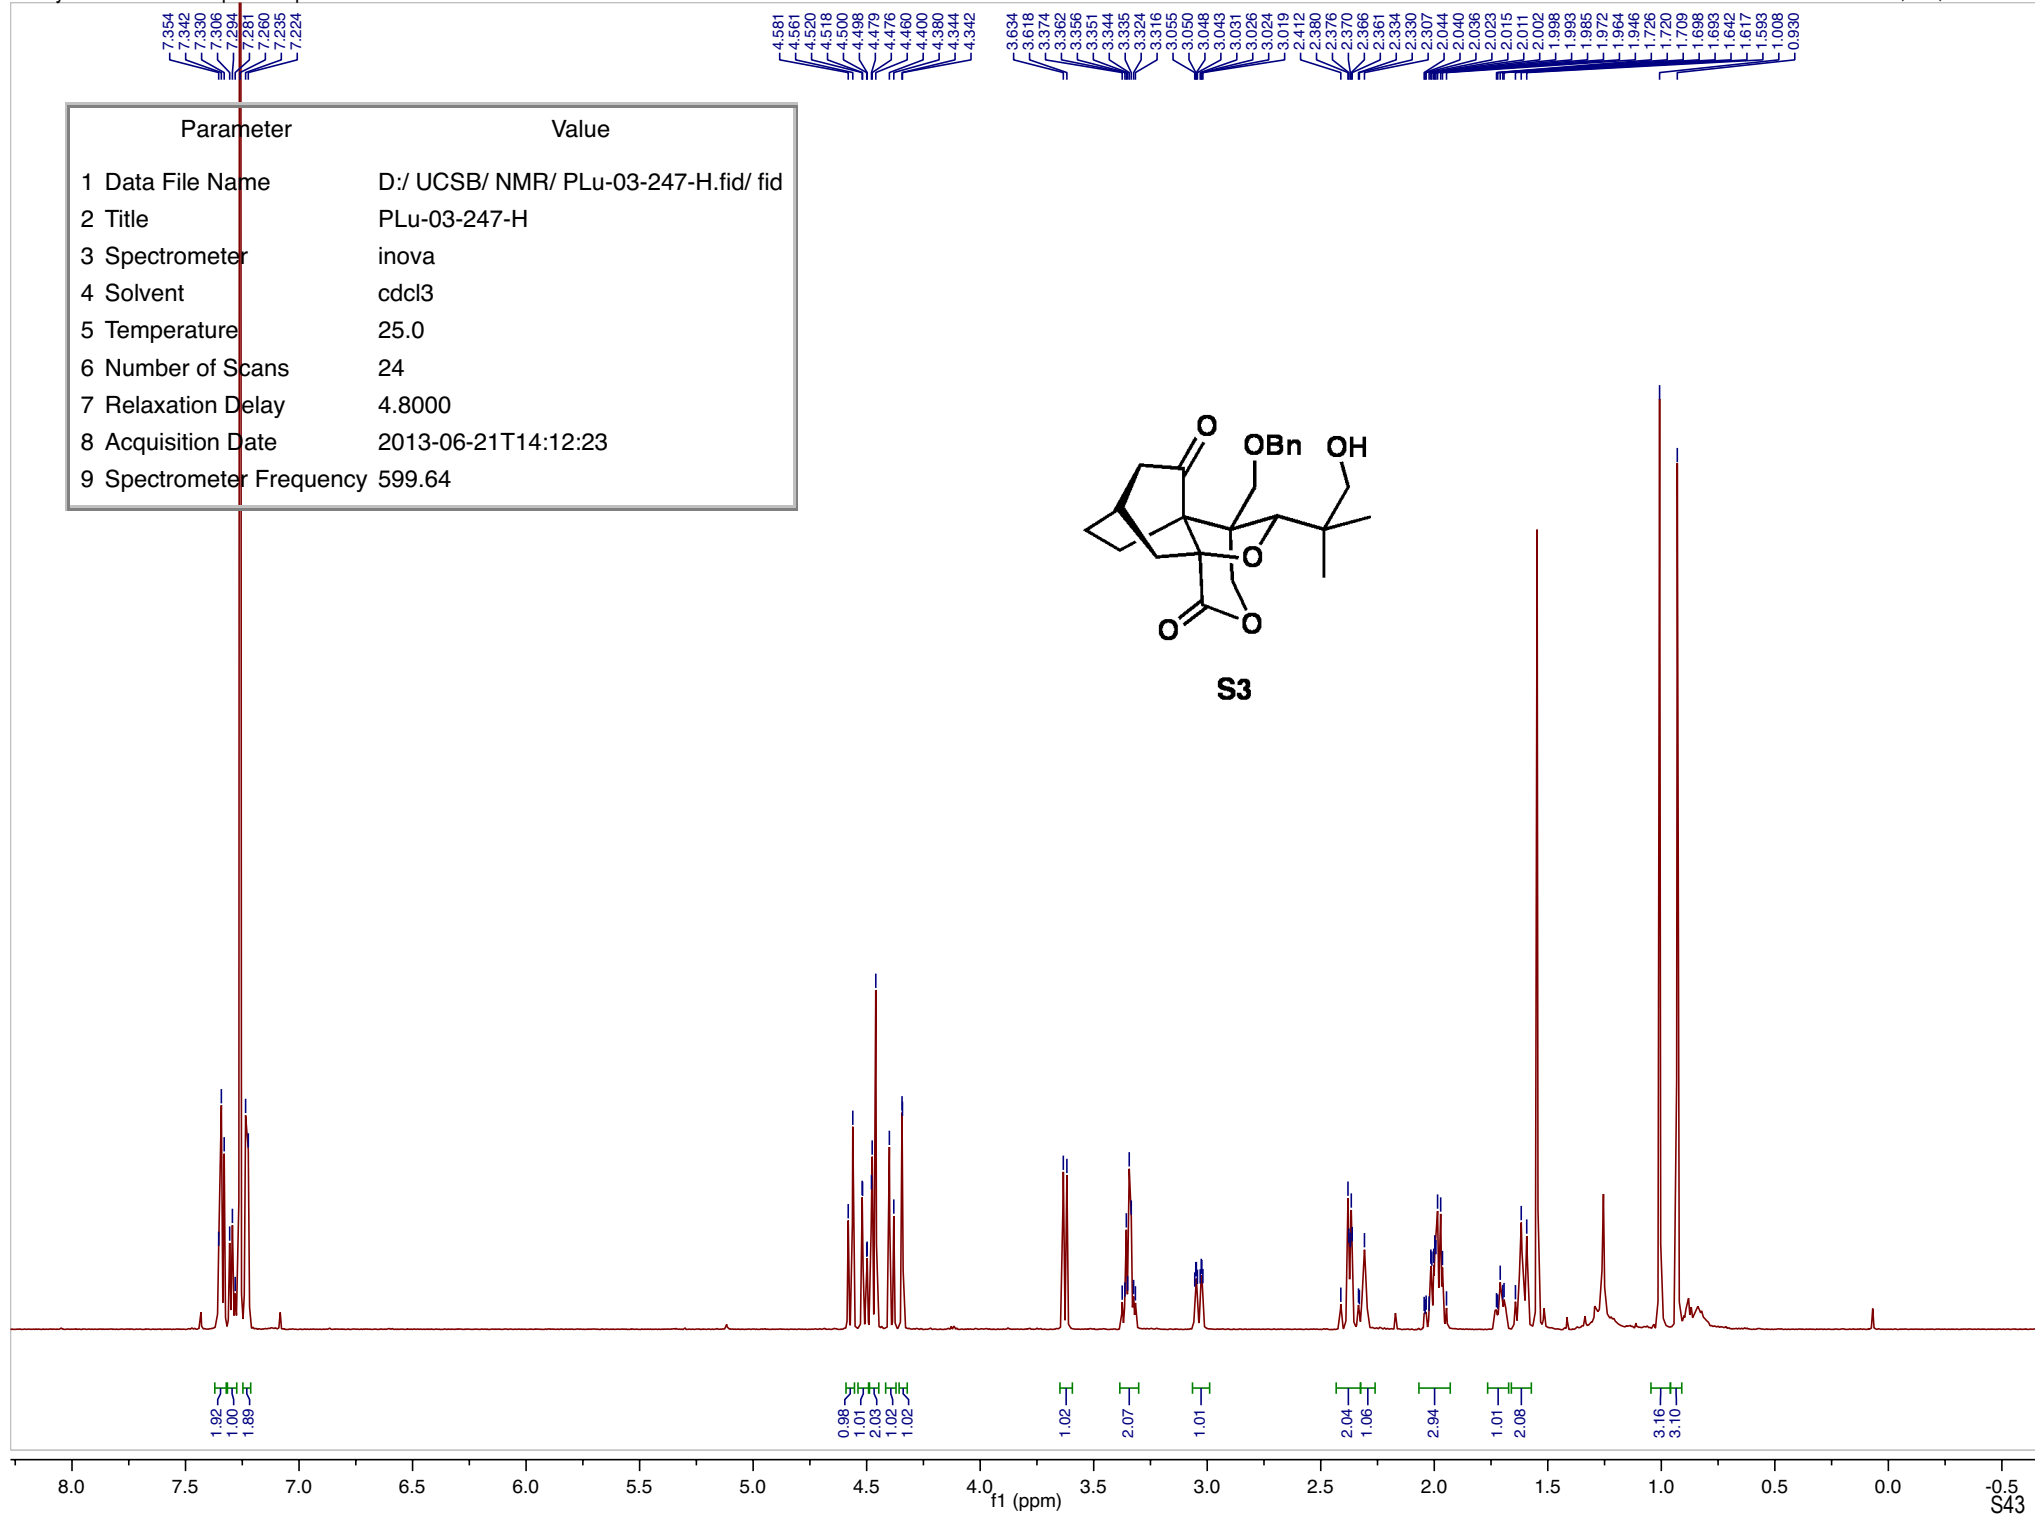

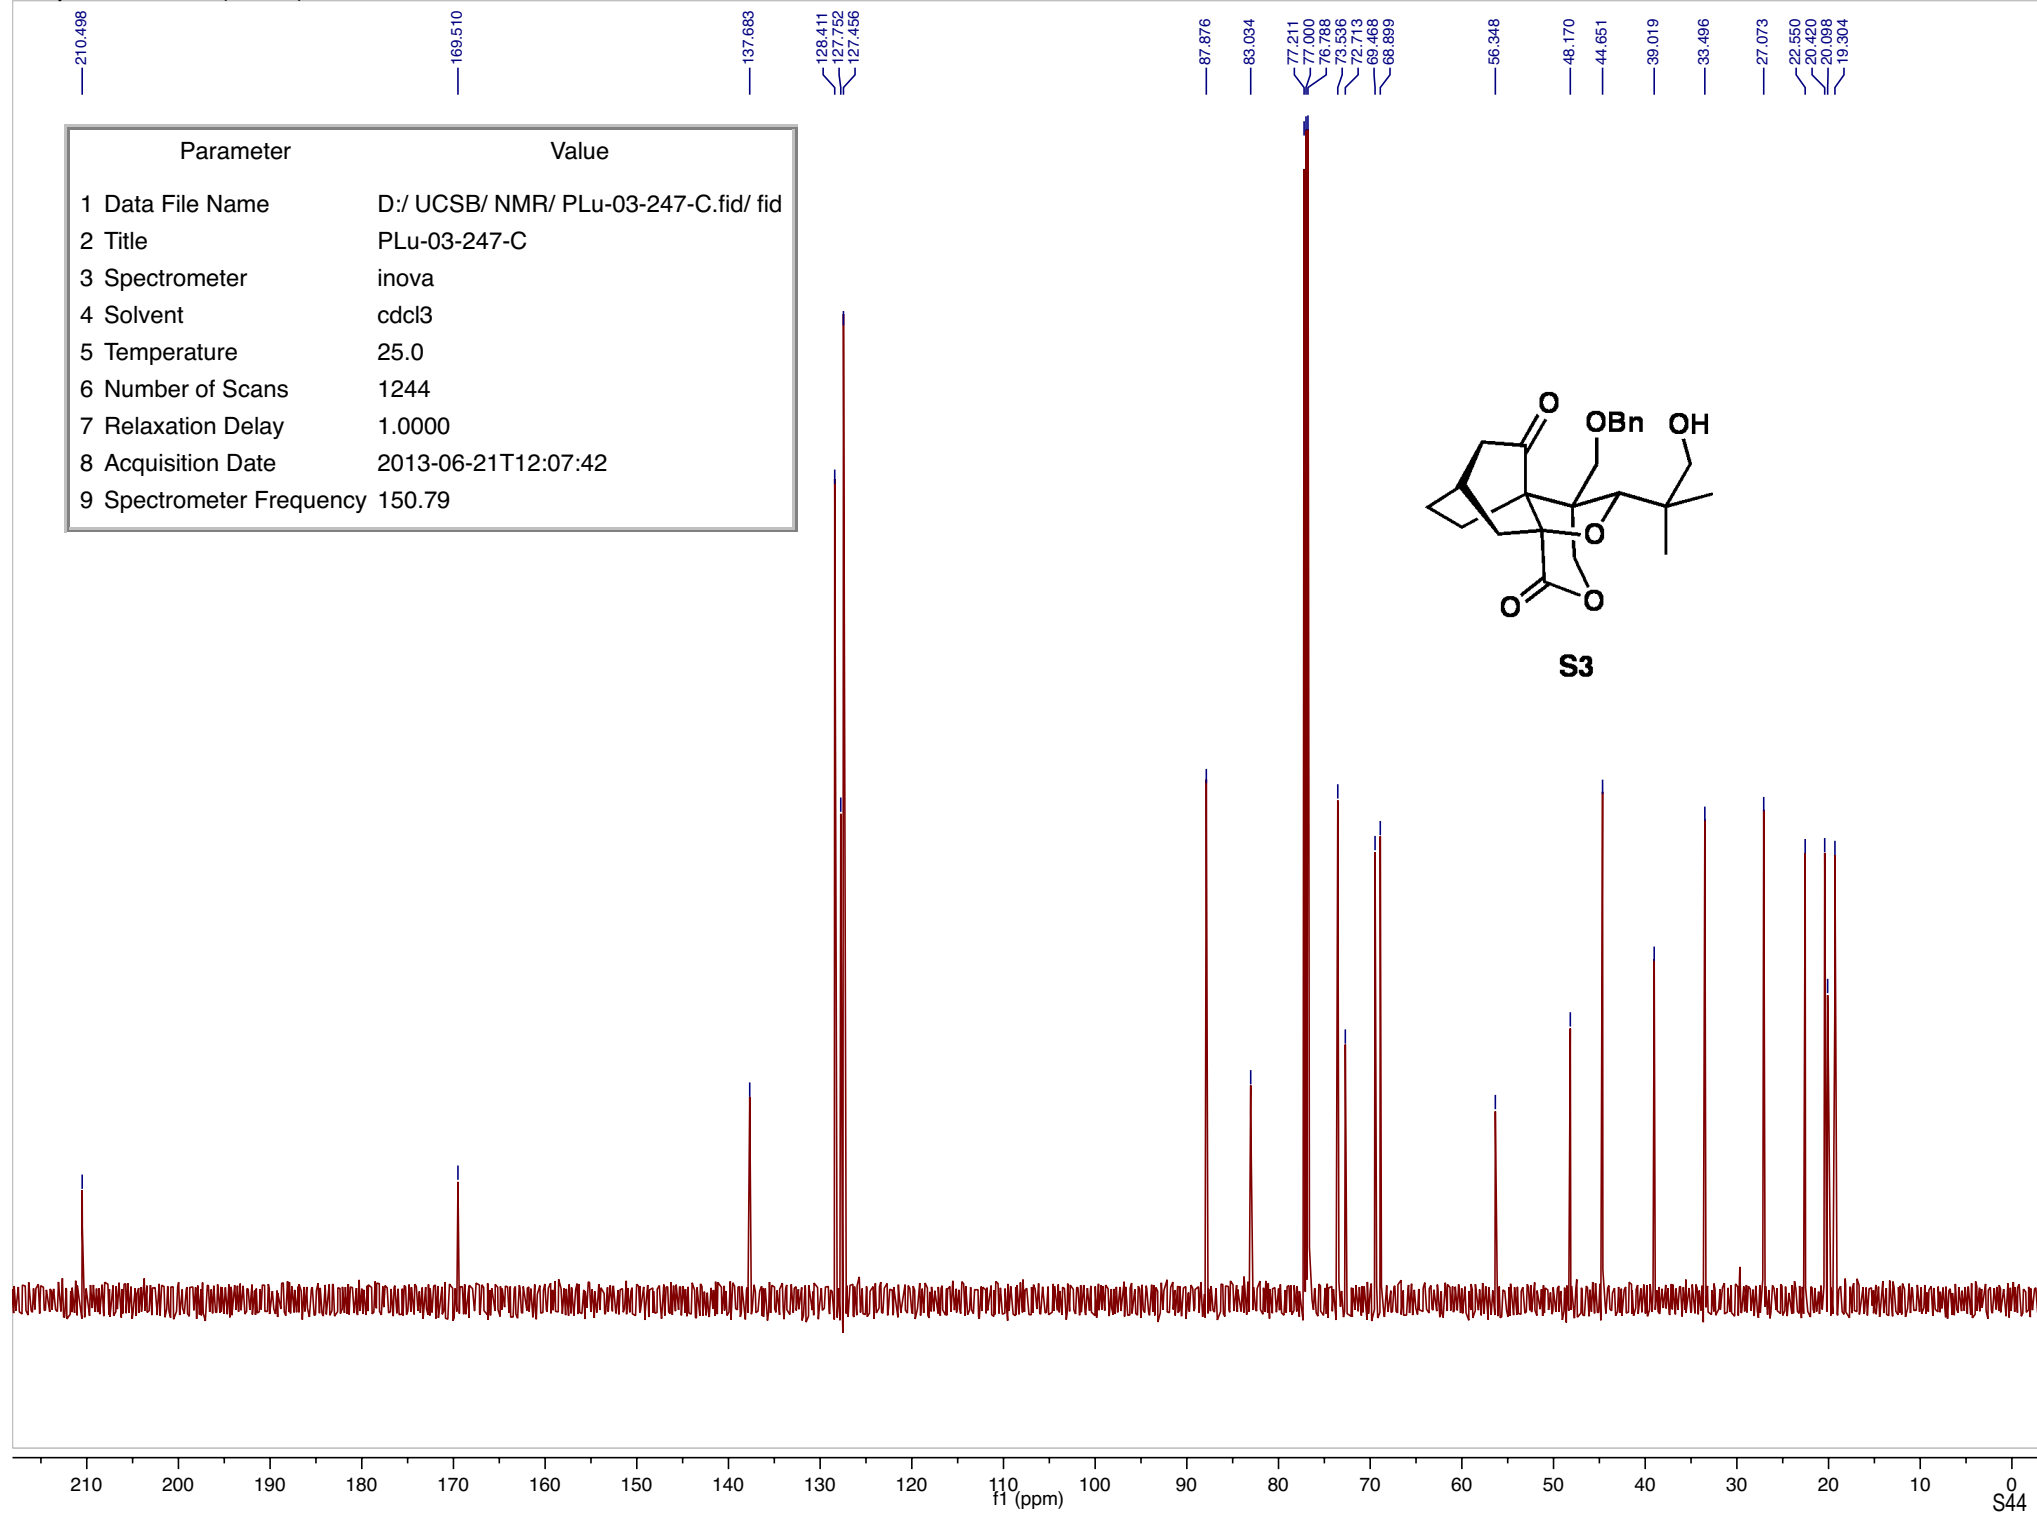

| Parameter                | Value                                 |
|--------------------------|---------------------------------------|
| 1 Data File Name         | D:/ UCSB/ NMR/ P Lu-03-248-H.fid/ fid |
| 2 Title                  | PLu-03-248-H                          |
| 3 Spectrometer           | inova                                 |
| 4 Solvent                | cdcl3                                 |
| 5 Temperature            | 25.0                                  |
| 6 Number of Scans        | 20                                    |
| 7 Relaxation Delay       | 4.8000                                |
| 8 Acquisition Date       | 2013-06-22T10:04:33                   |
| 9 Spectrometer Frequency | 599.64                                |

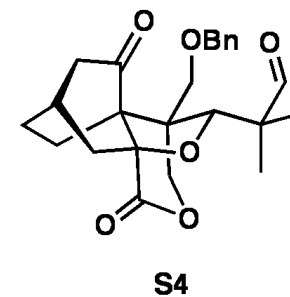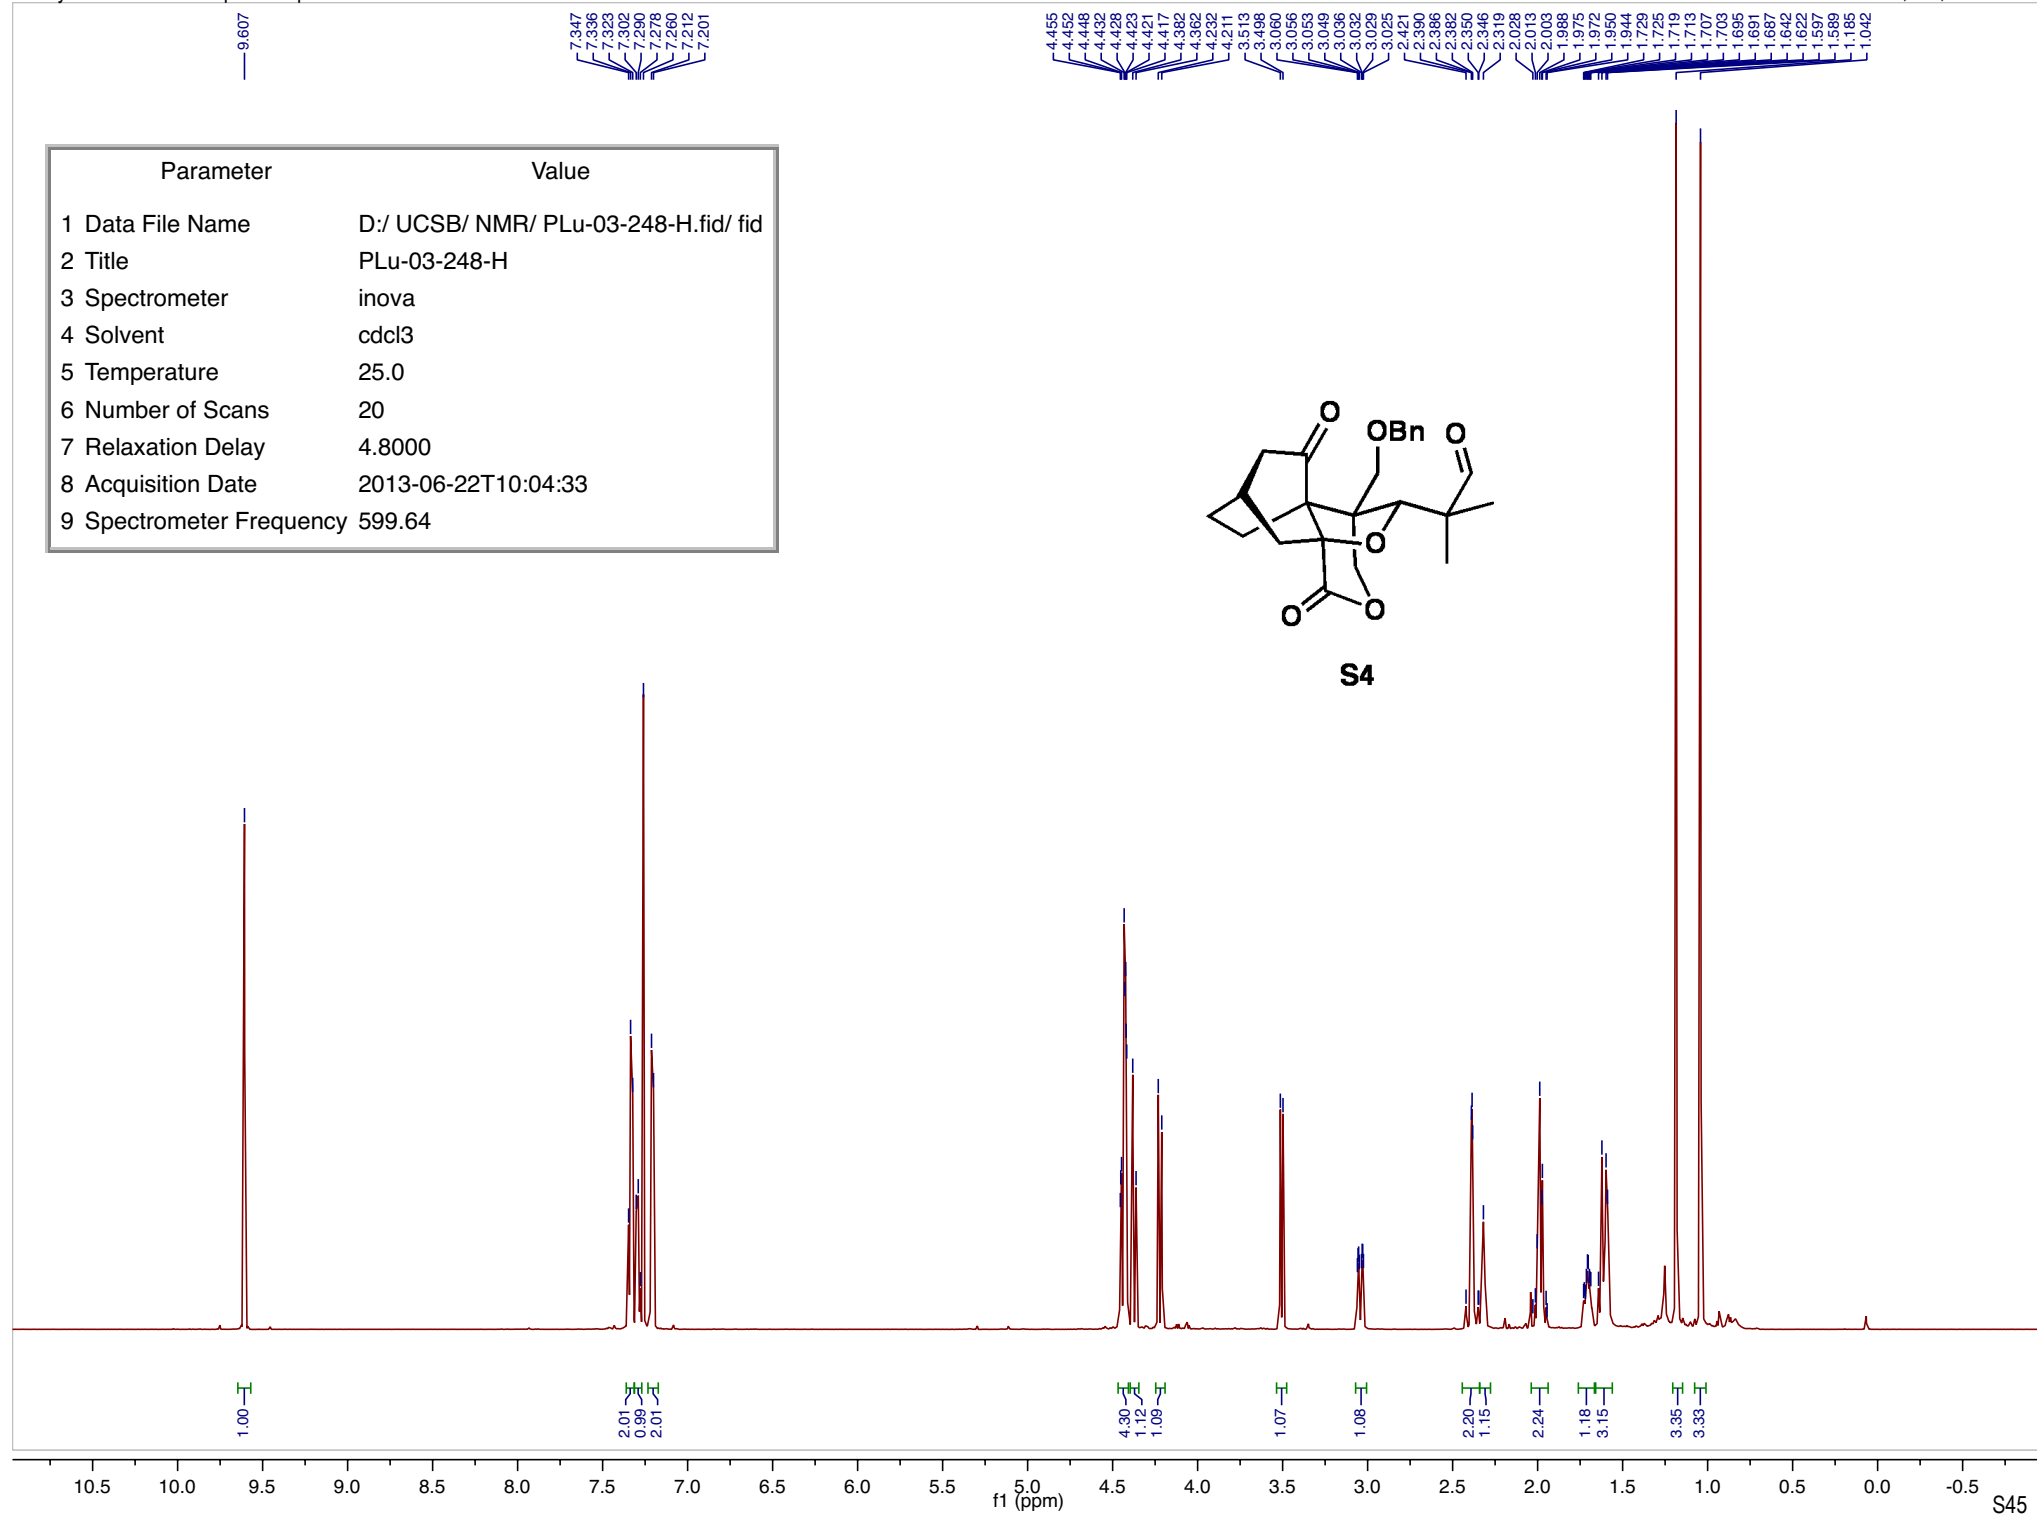

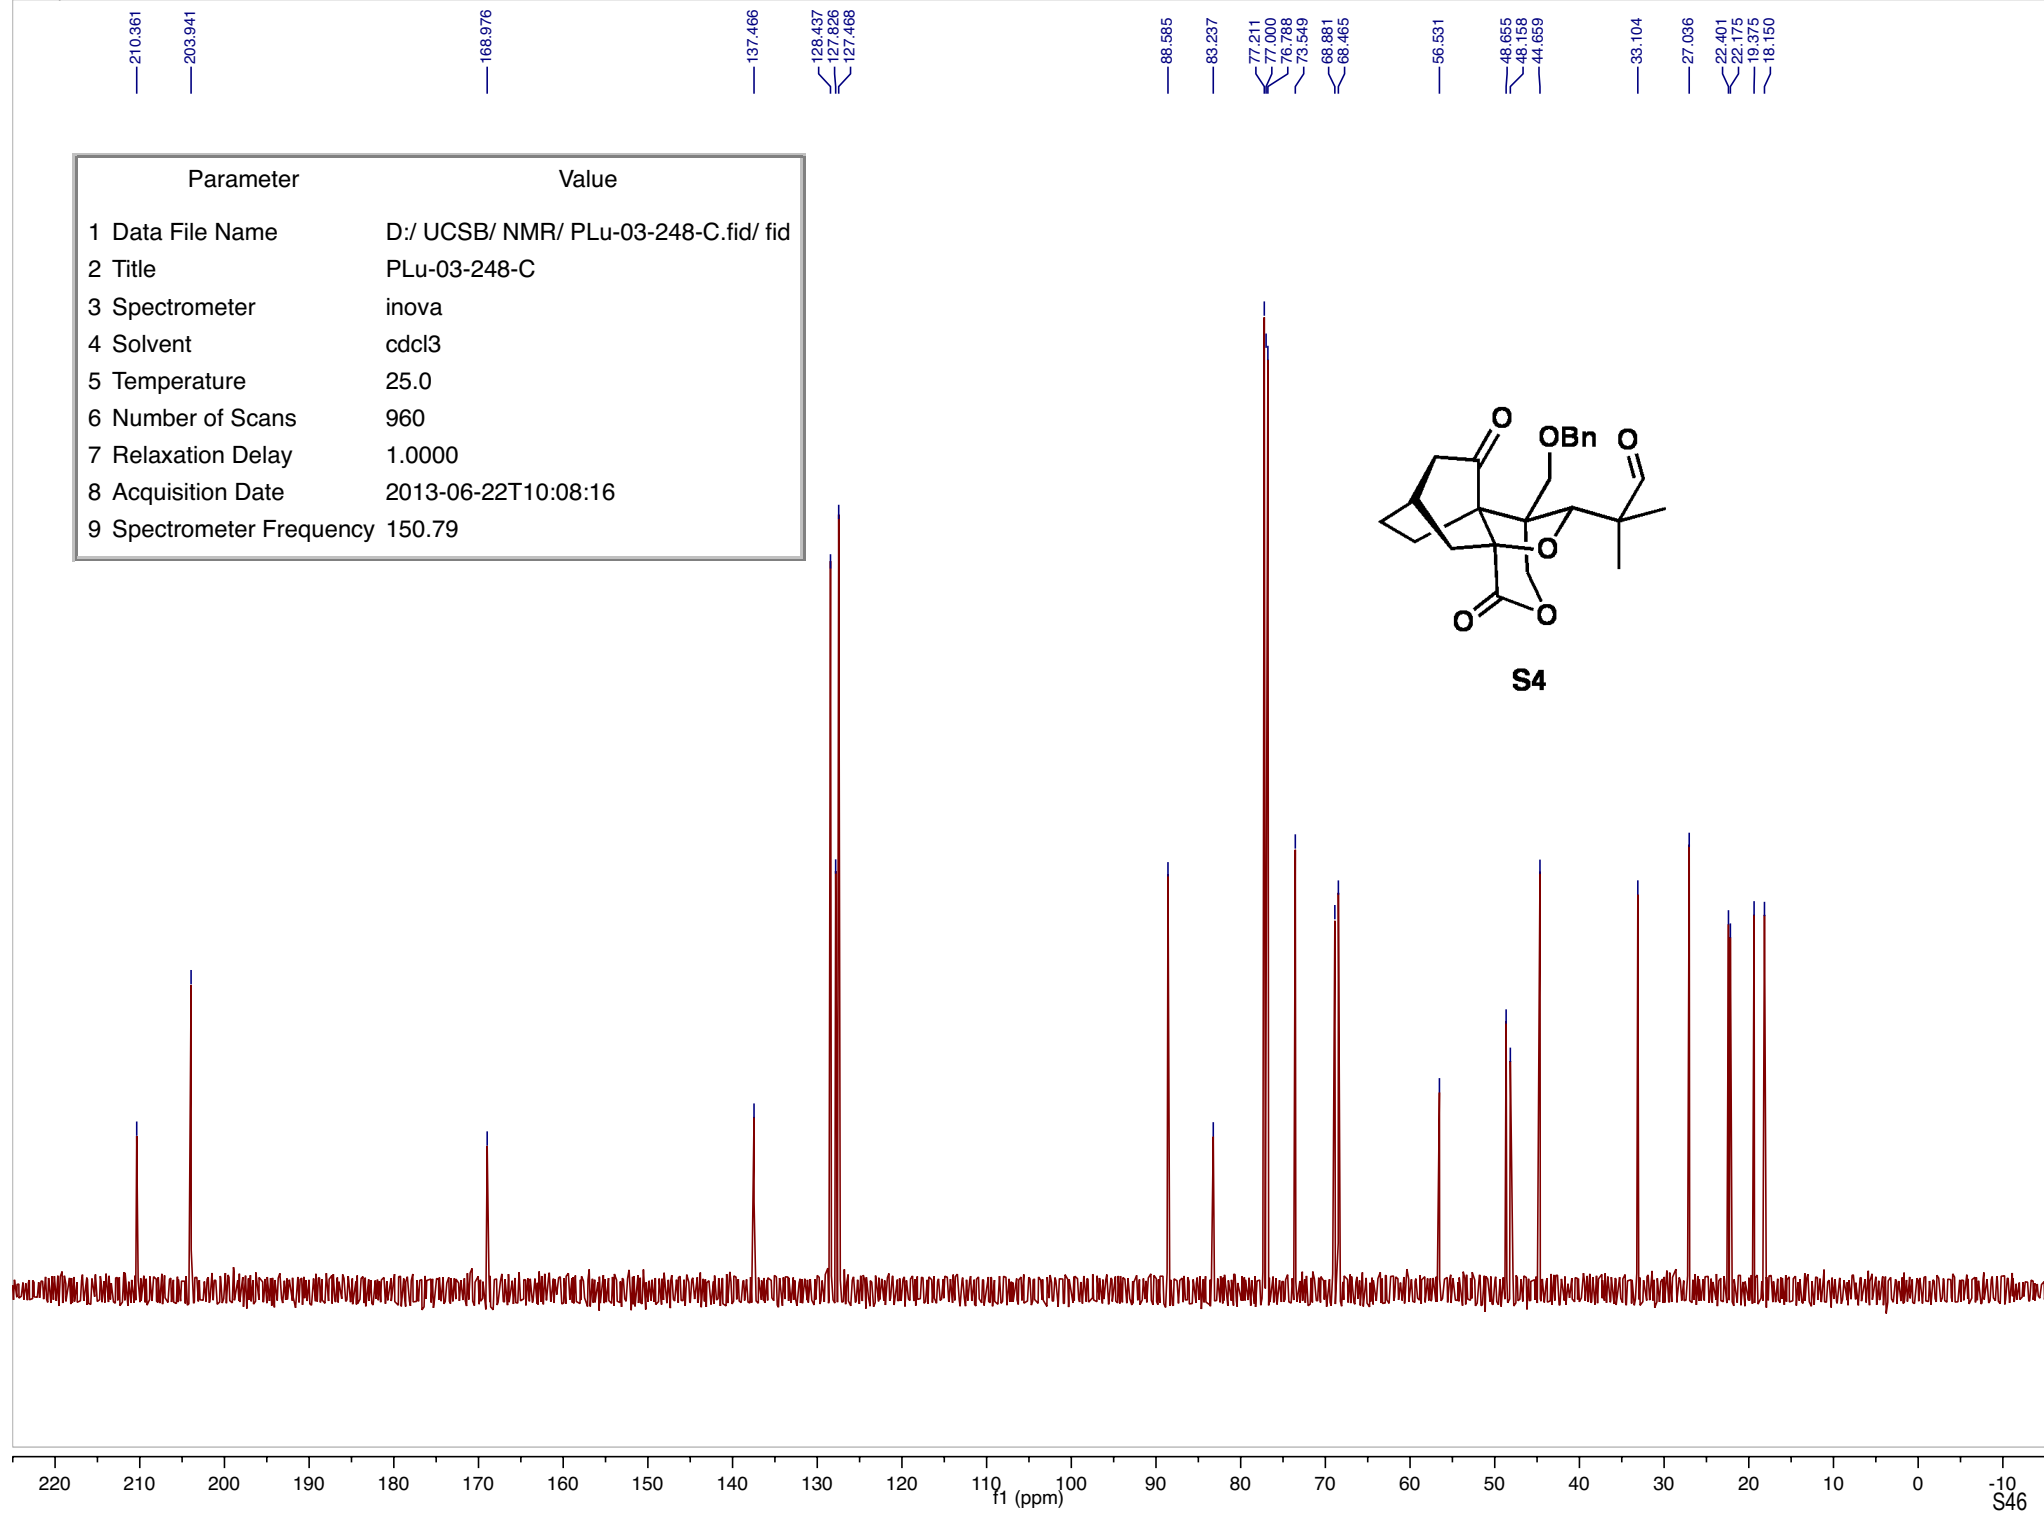

| Parameter                | Value                                |
|--------------------------|--------------------------------------|
| 1 Data File Name         | D:/ UCSB/ NMR/ PLu-03-129-H.fid/ fid |
| 2 Title                  | PLu-03-129-H                         |
| 3 Spectrometer           | inova                                |
| 4 Solvent                | cdcl3                                |
| 5 Temperature            | 25.0                                 |
| 6 Number of Scans        | 20                                   |
| 7 Relaxation Delay       | 4.8000                               |
| 8 Acquisition Date       | 2013-04-17T18:34:14                  |
| 9 Spectrometer Frequency | 599.64                               |

7.344  
7.332  
7.319  
7.294  
7.282  
7.269  
7.260  
7.218  
7.206

5.983  
5.965  
5.953  
5.935

5.090  
5.088  
5.060  
5.059  
5.049  
5.031  
4.516  
4.501  
4.497  
4.466  
4.447  
4.382  
4.379  
4.367  
4.362  
4.360  
4.347  
4.145  
4.143

3.448  
3.433  
3.064  
3.056  
3.052  
3.040  
3.035  
3.032  
3.028  
2.409  
2.405  
2.377  
2.373  
2.368  
2.365  
2.361  
2.357  
2.329  
2.293  
2.285  
2.003  
2.000  
1.997  
1.985  
1.980  
1.970  
1.959  
1.945  
1.706  
1.700  
1.696  
1.692  
1.688  
1.684  
1.680  
1.678  
1.674  
1.668  
1.665  
1.662  
1.658  
1.626  
1.605  
1.603  
1.594  
1.590  
1.588  
1.570  
1.1076  
1.1042

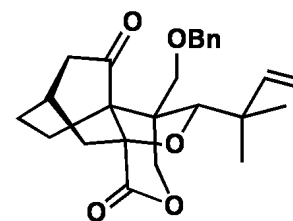**20**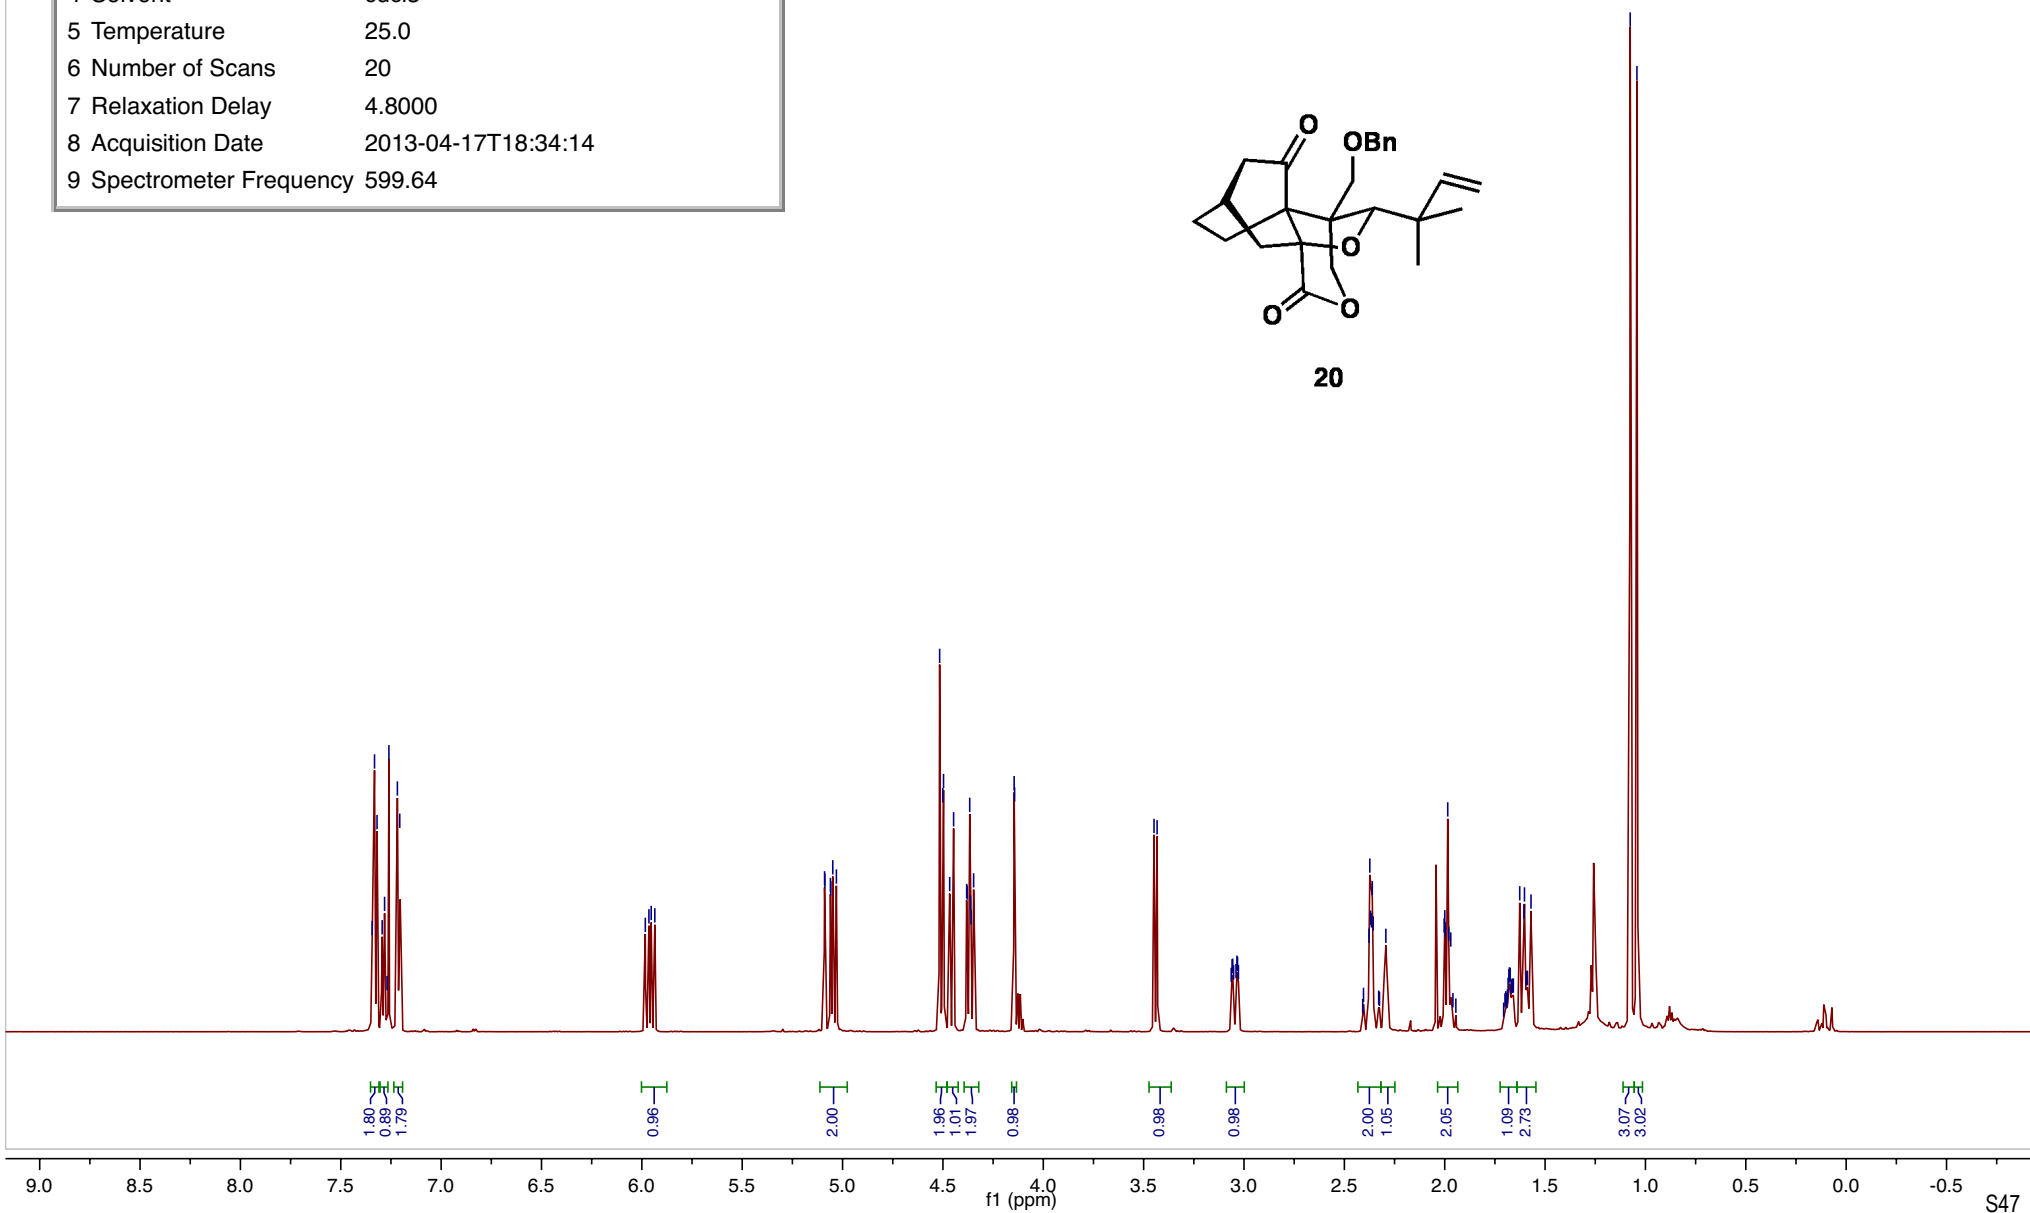

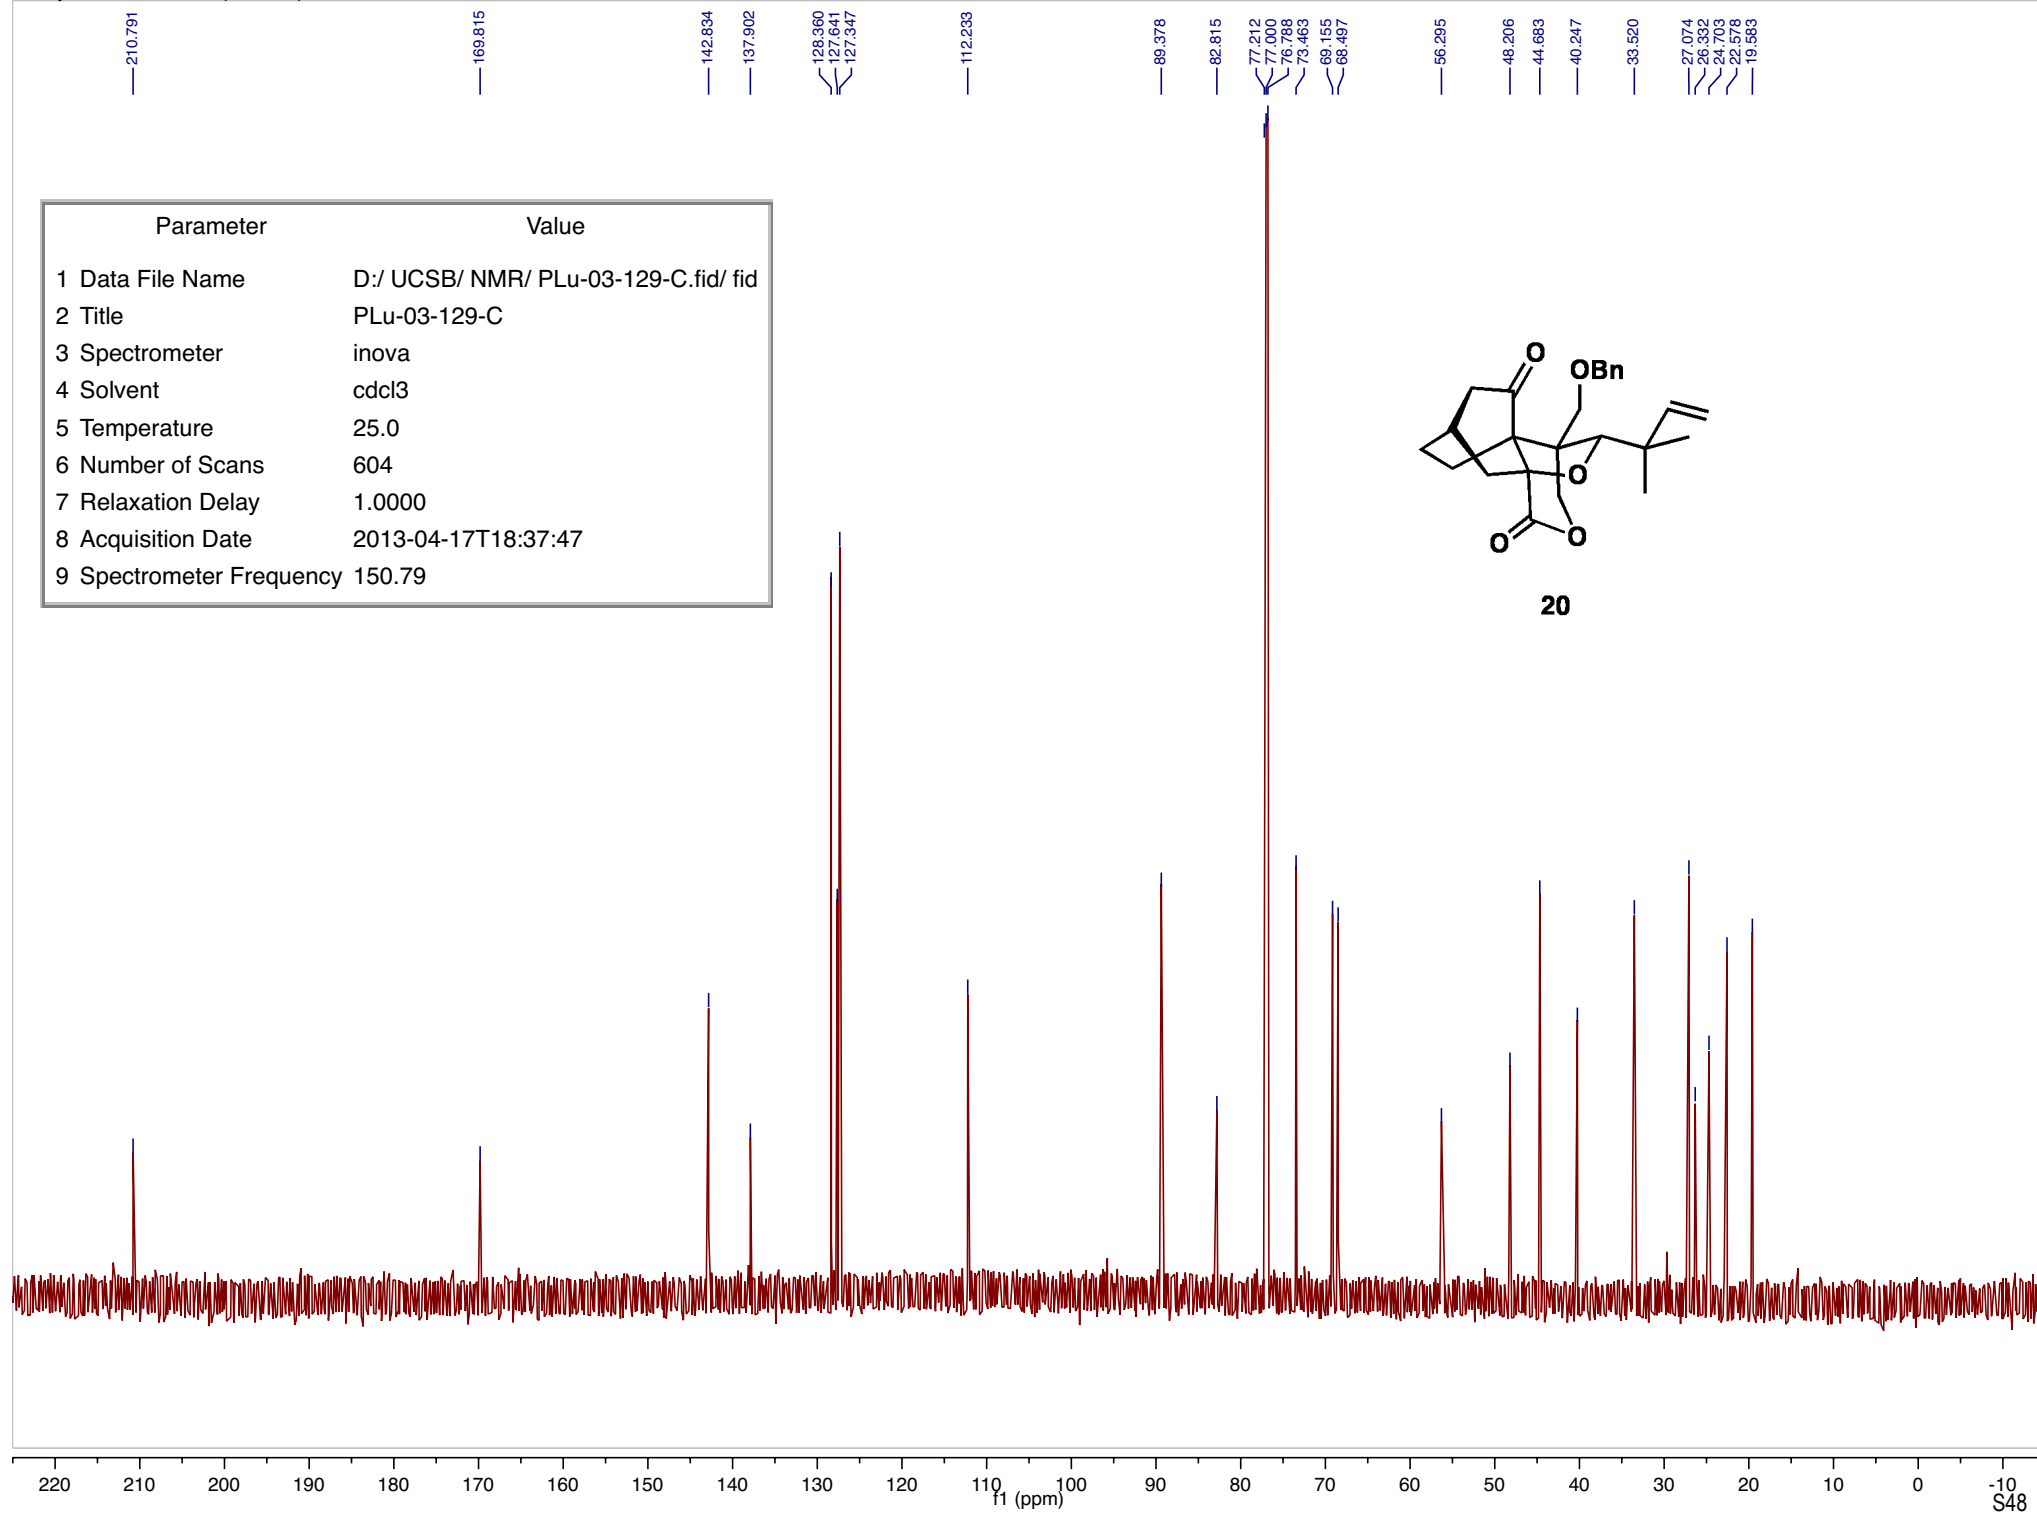



| Parameter                | Value                               |
|--------------------------|-------------------------------------|
| 1 Data File Name         | D:/ UCSB/ NMR/ PLu-04-55-H.fid/ fid |
| 2 Title                  | PLu-04-55-H                         |
| 3 Spectrometer           | inova                               |
| 4 Solvent                | CDCl3                               |
| 5 Temperature            | 23.0                                |
| 6 Number of Scans        | 32                                  |
| 7 Relaxation Delay       | 4.8000                              |
| 8 Acquisition Date       | 2013-09-14T13:04:52                 |
| 9 Spectrometer Frequency | 499.86                              |

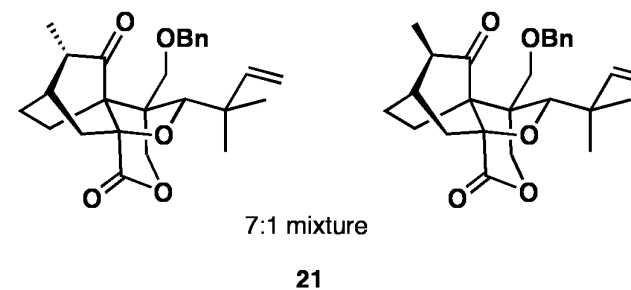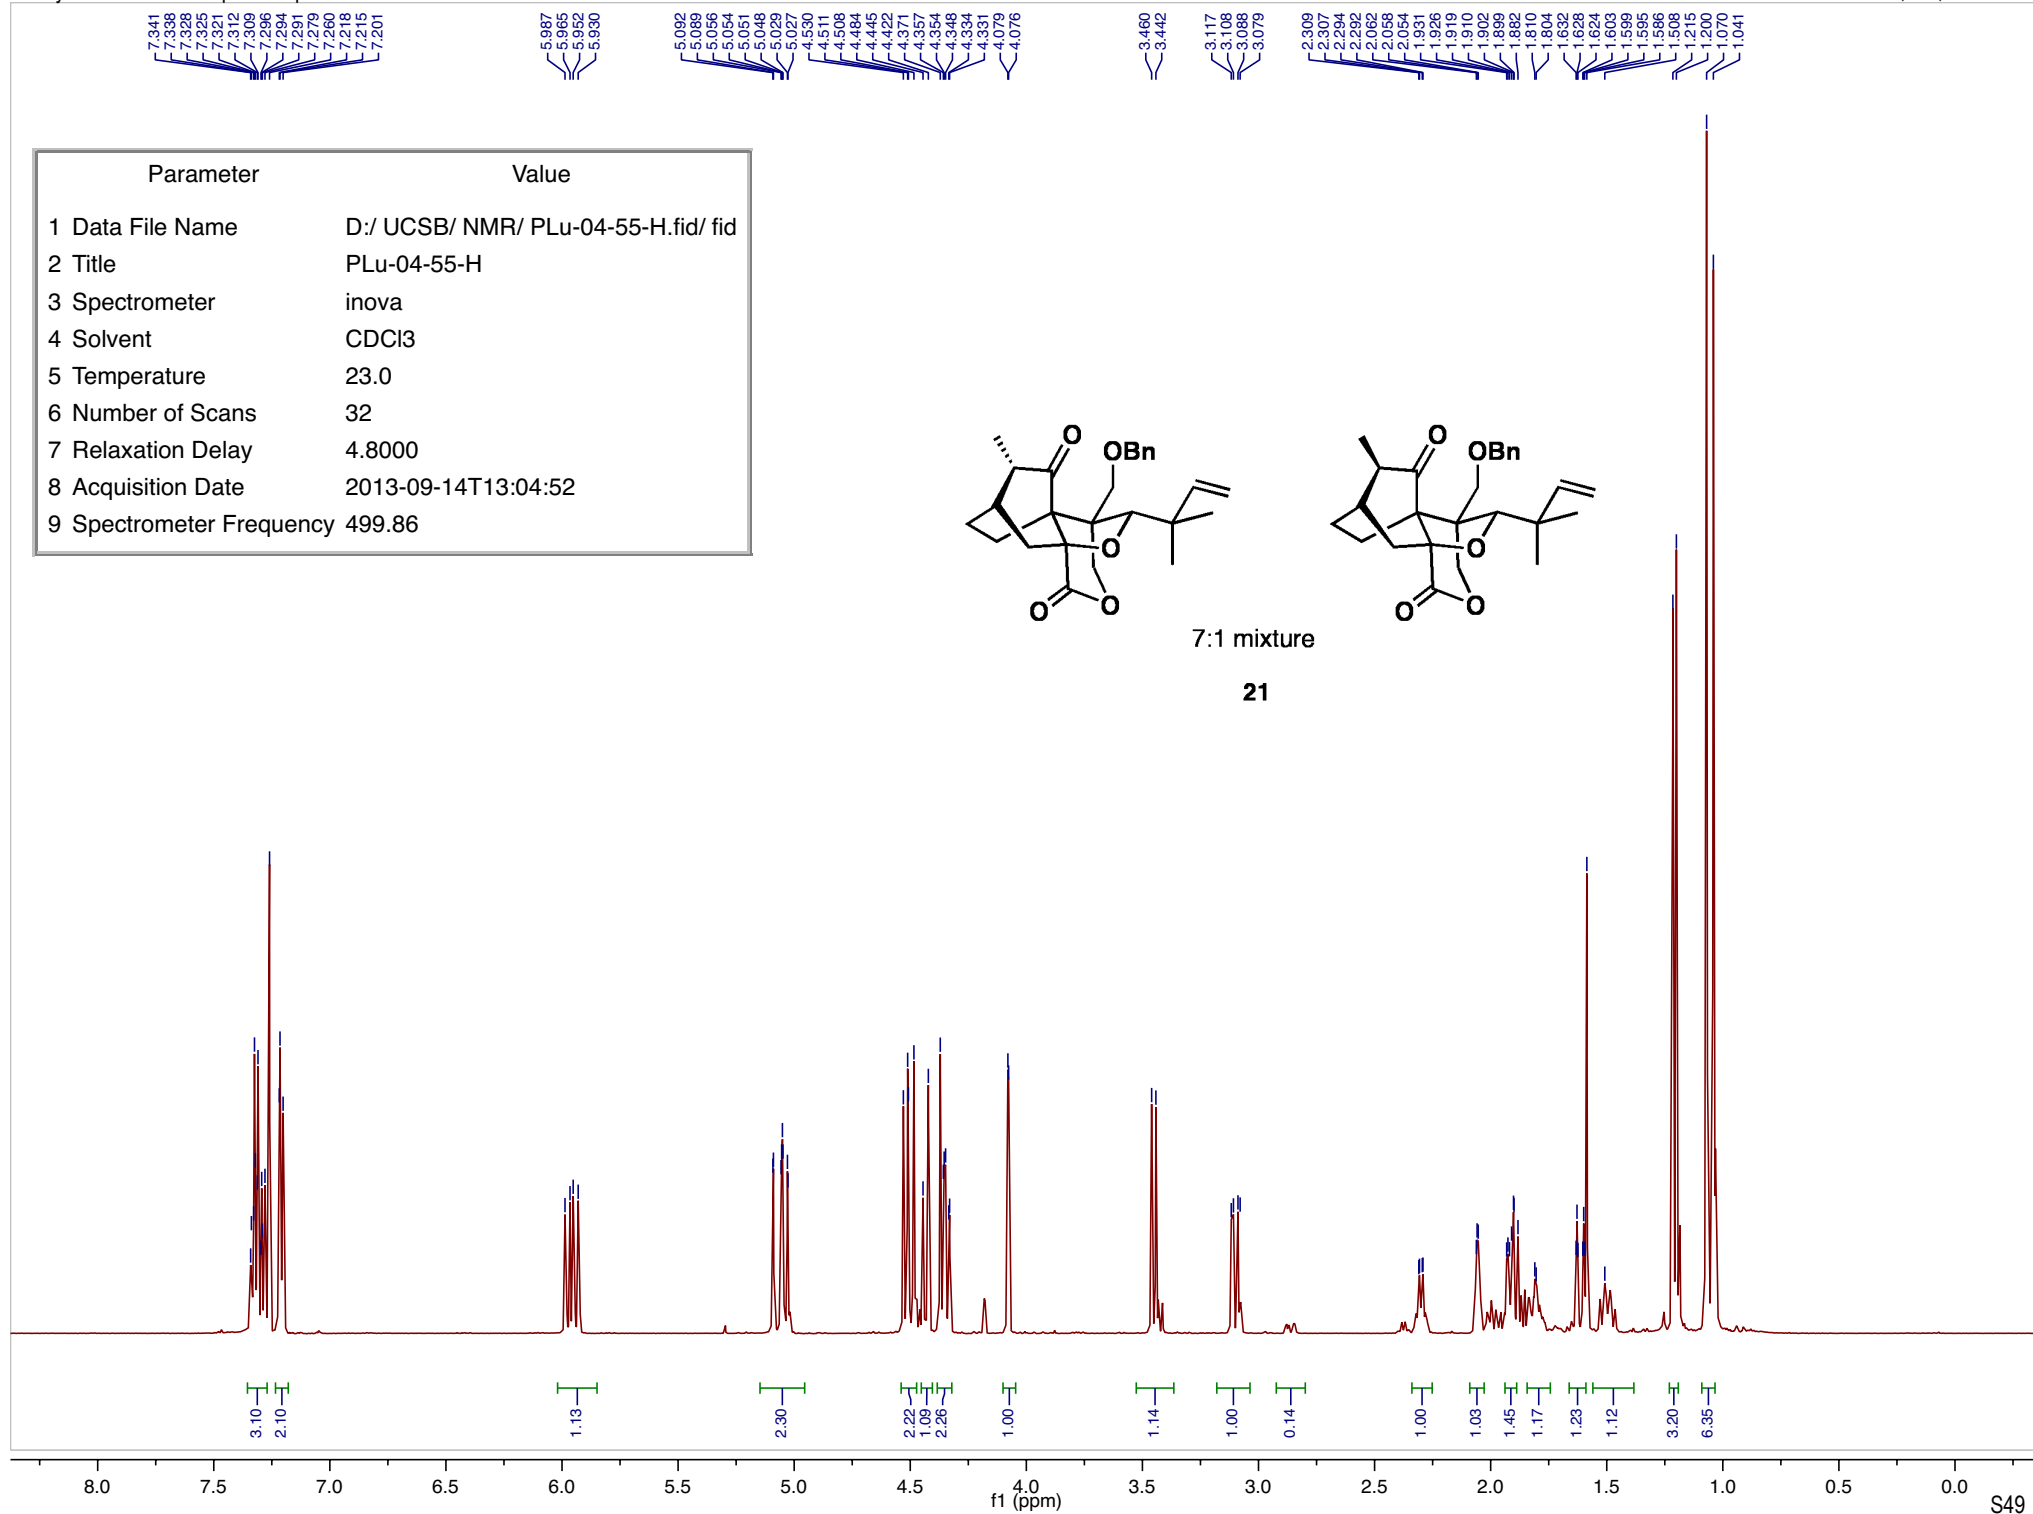

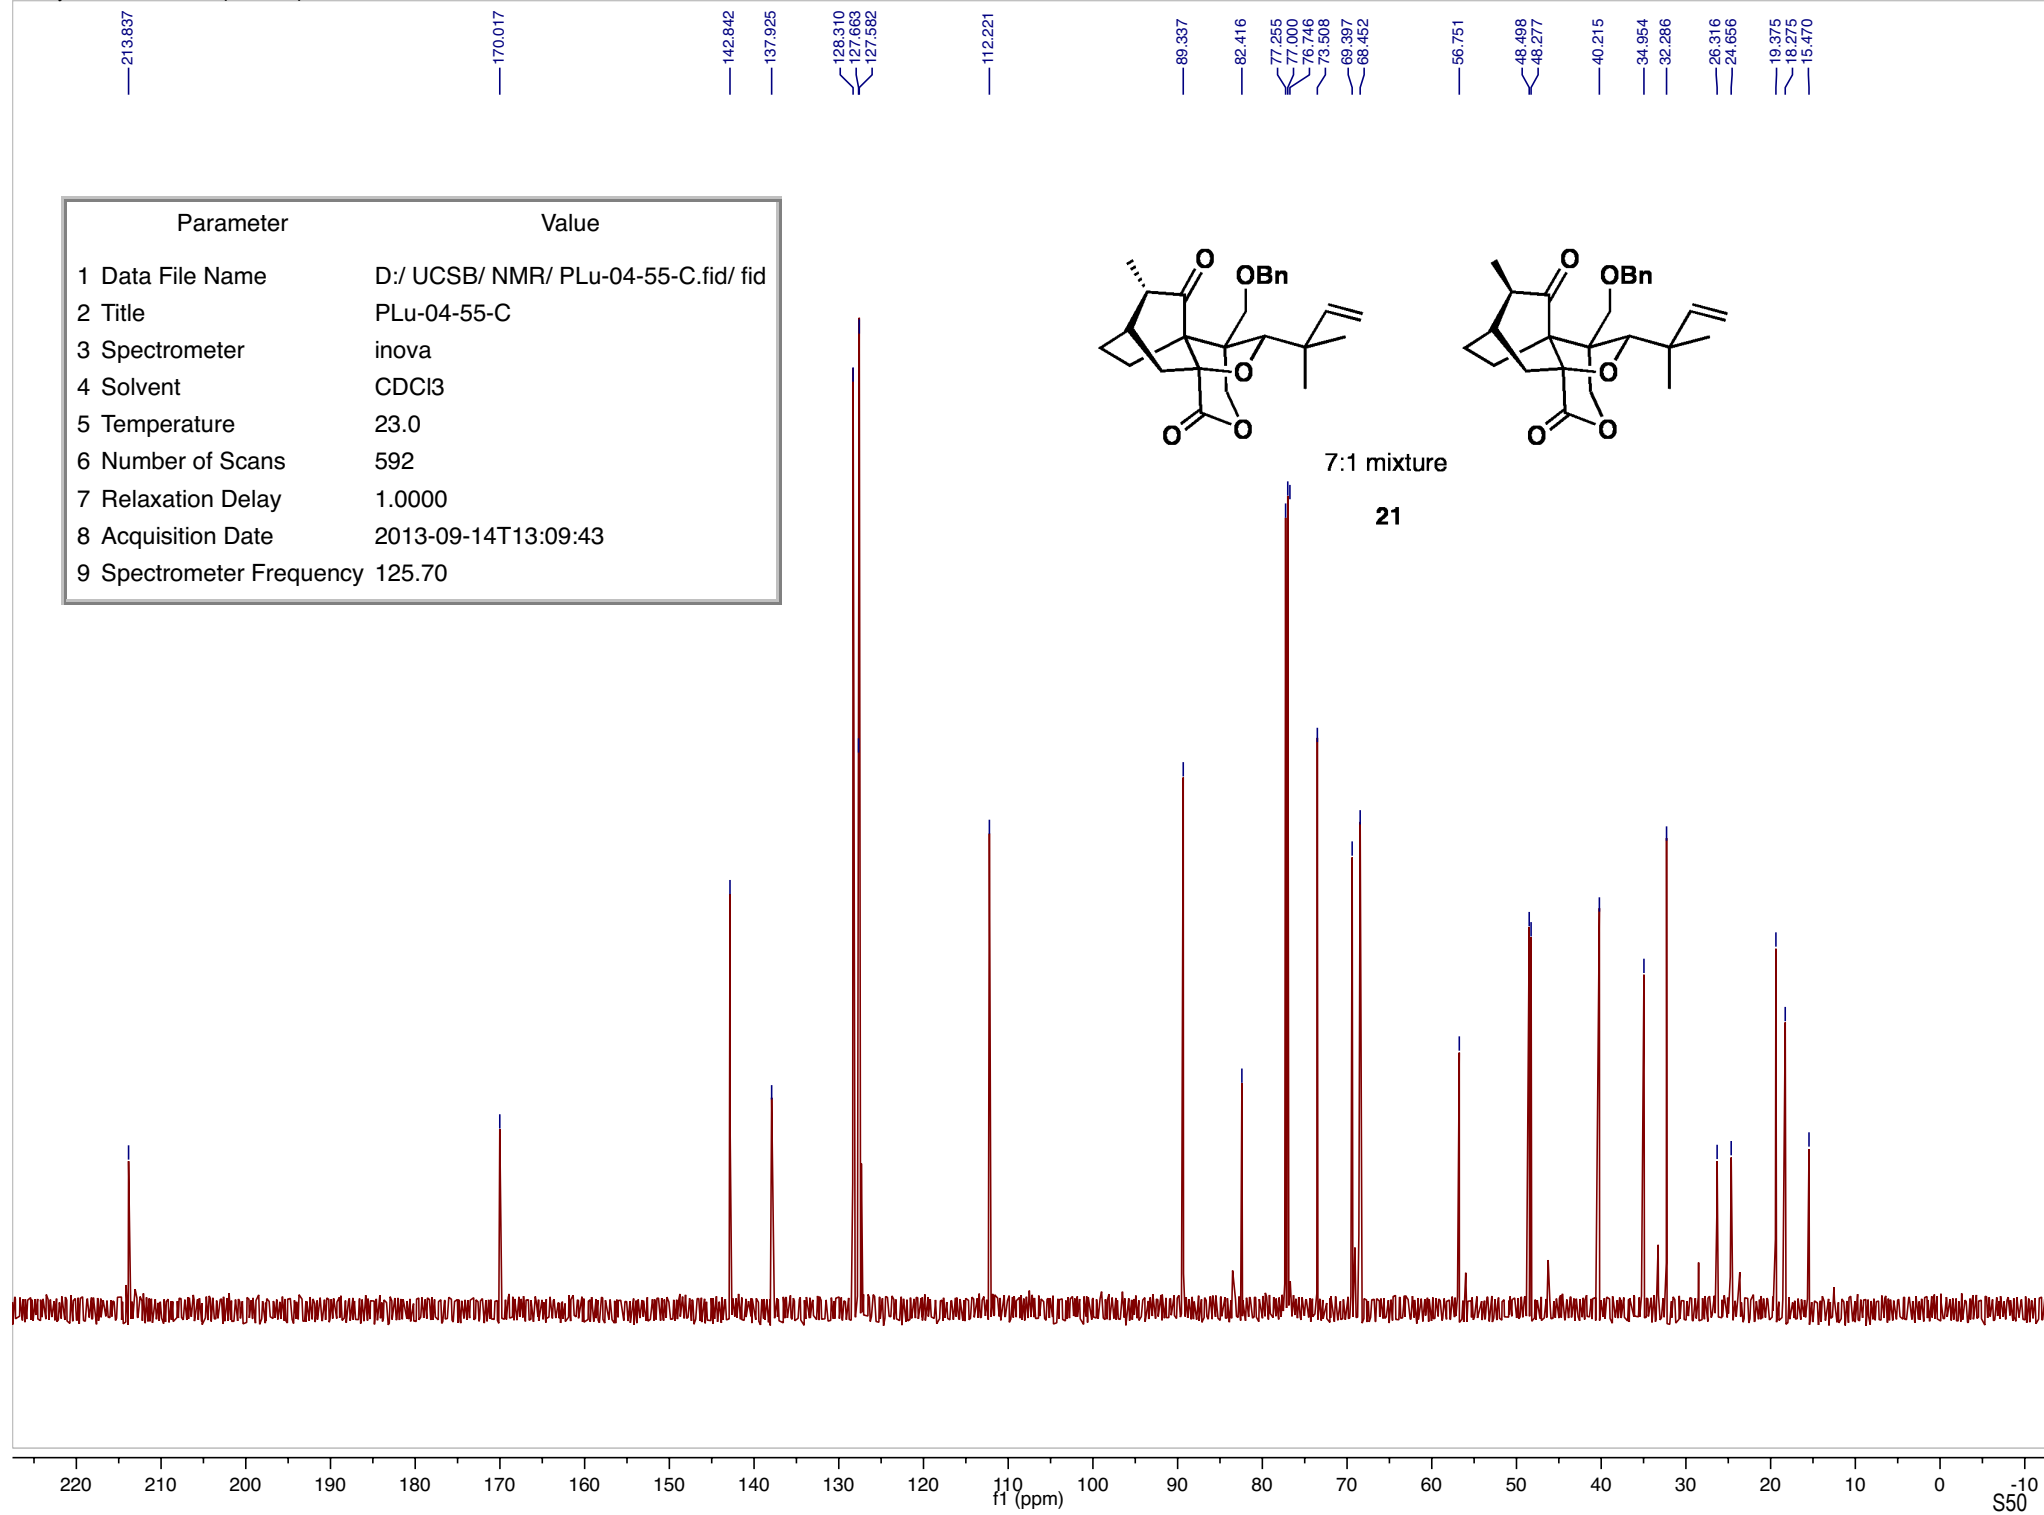

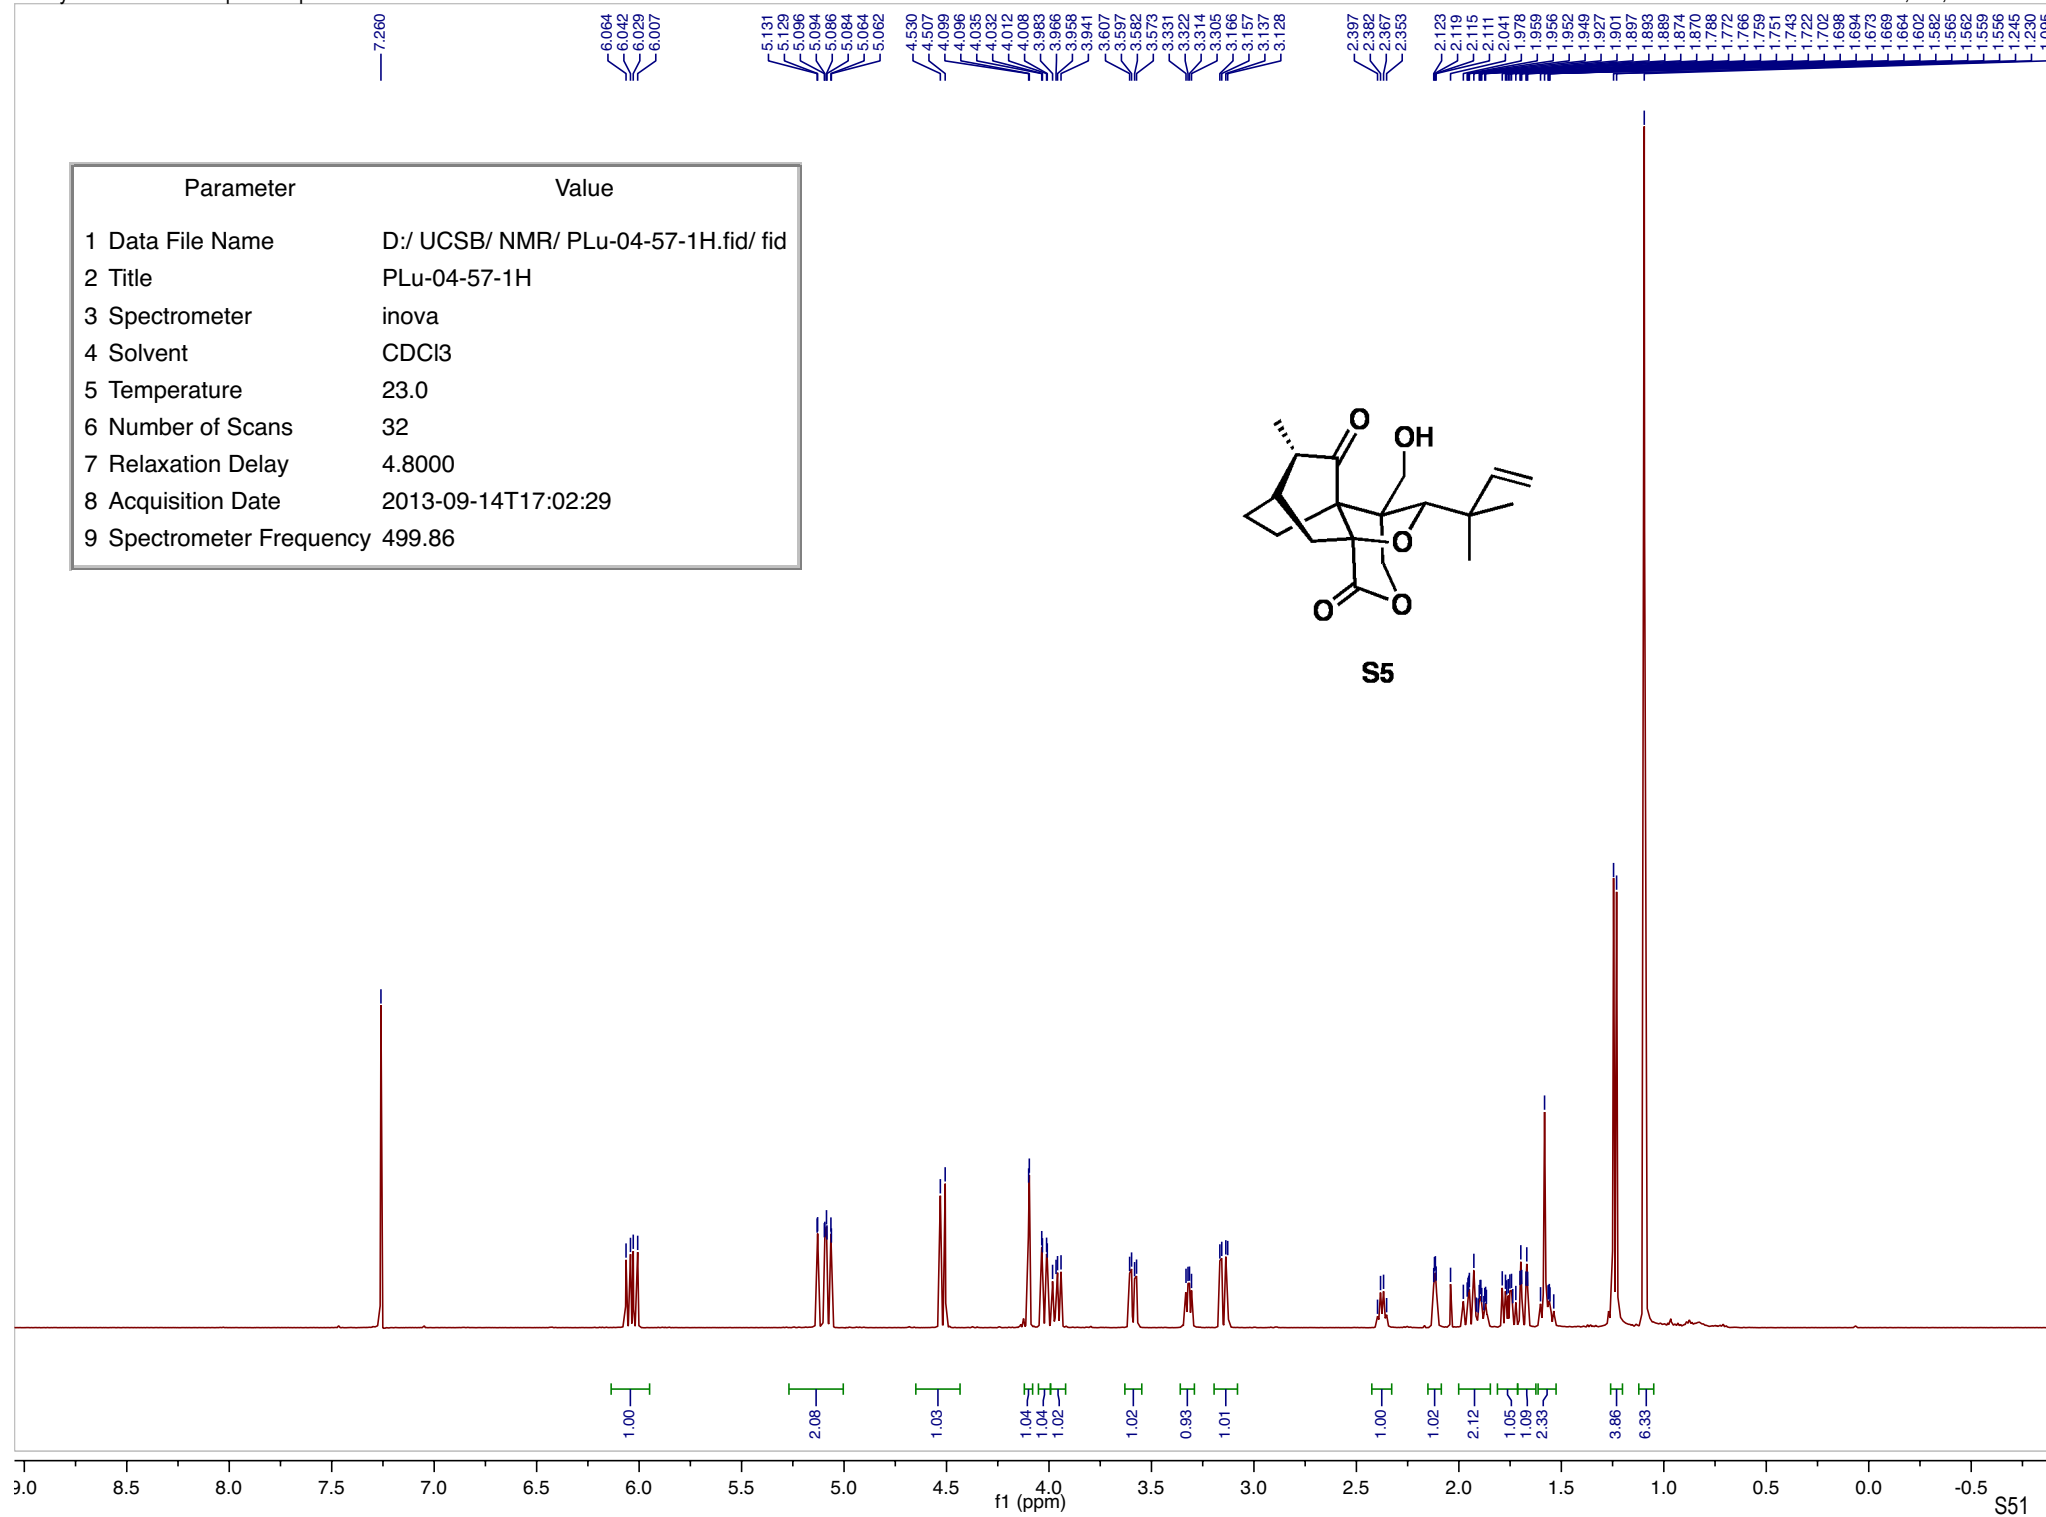

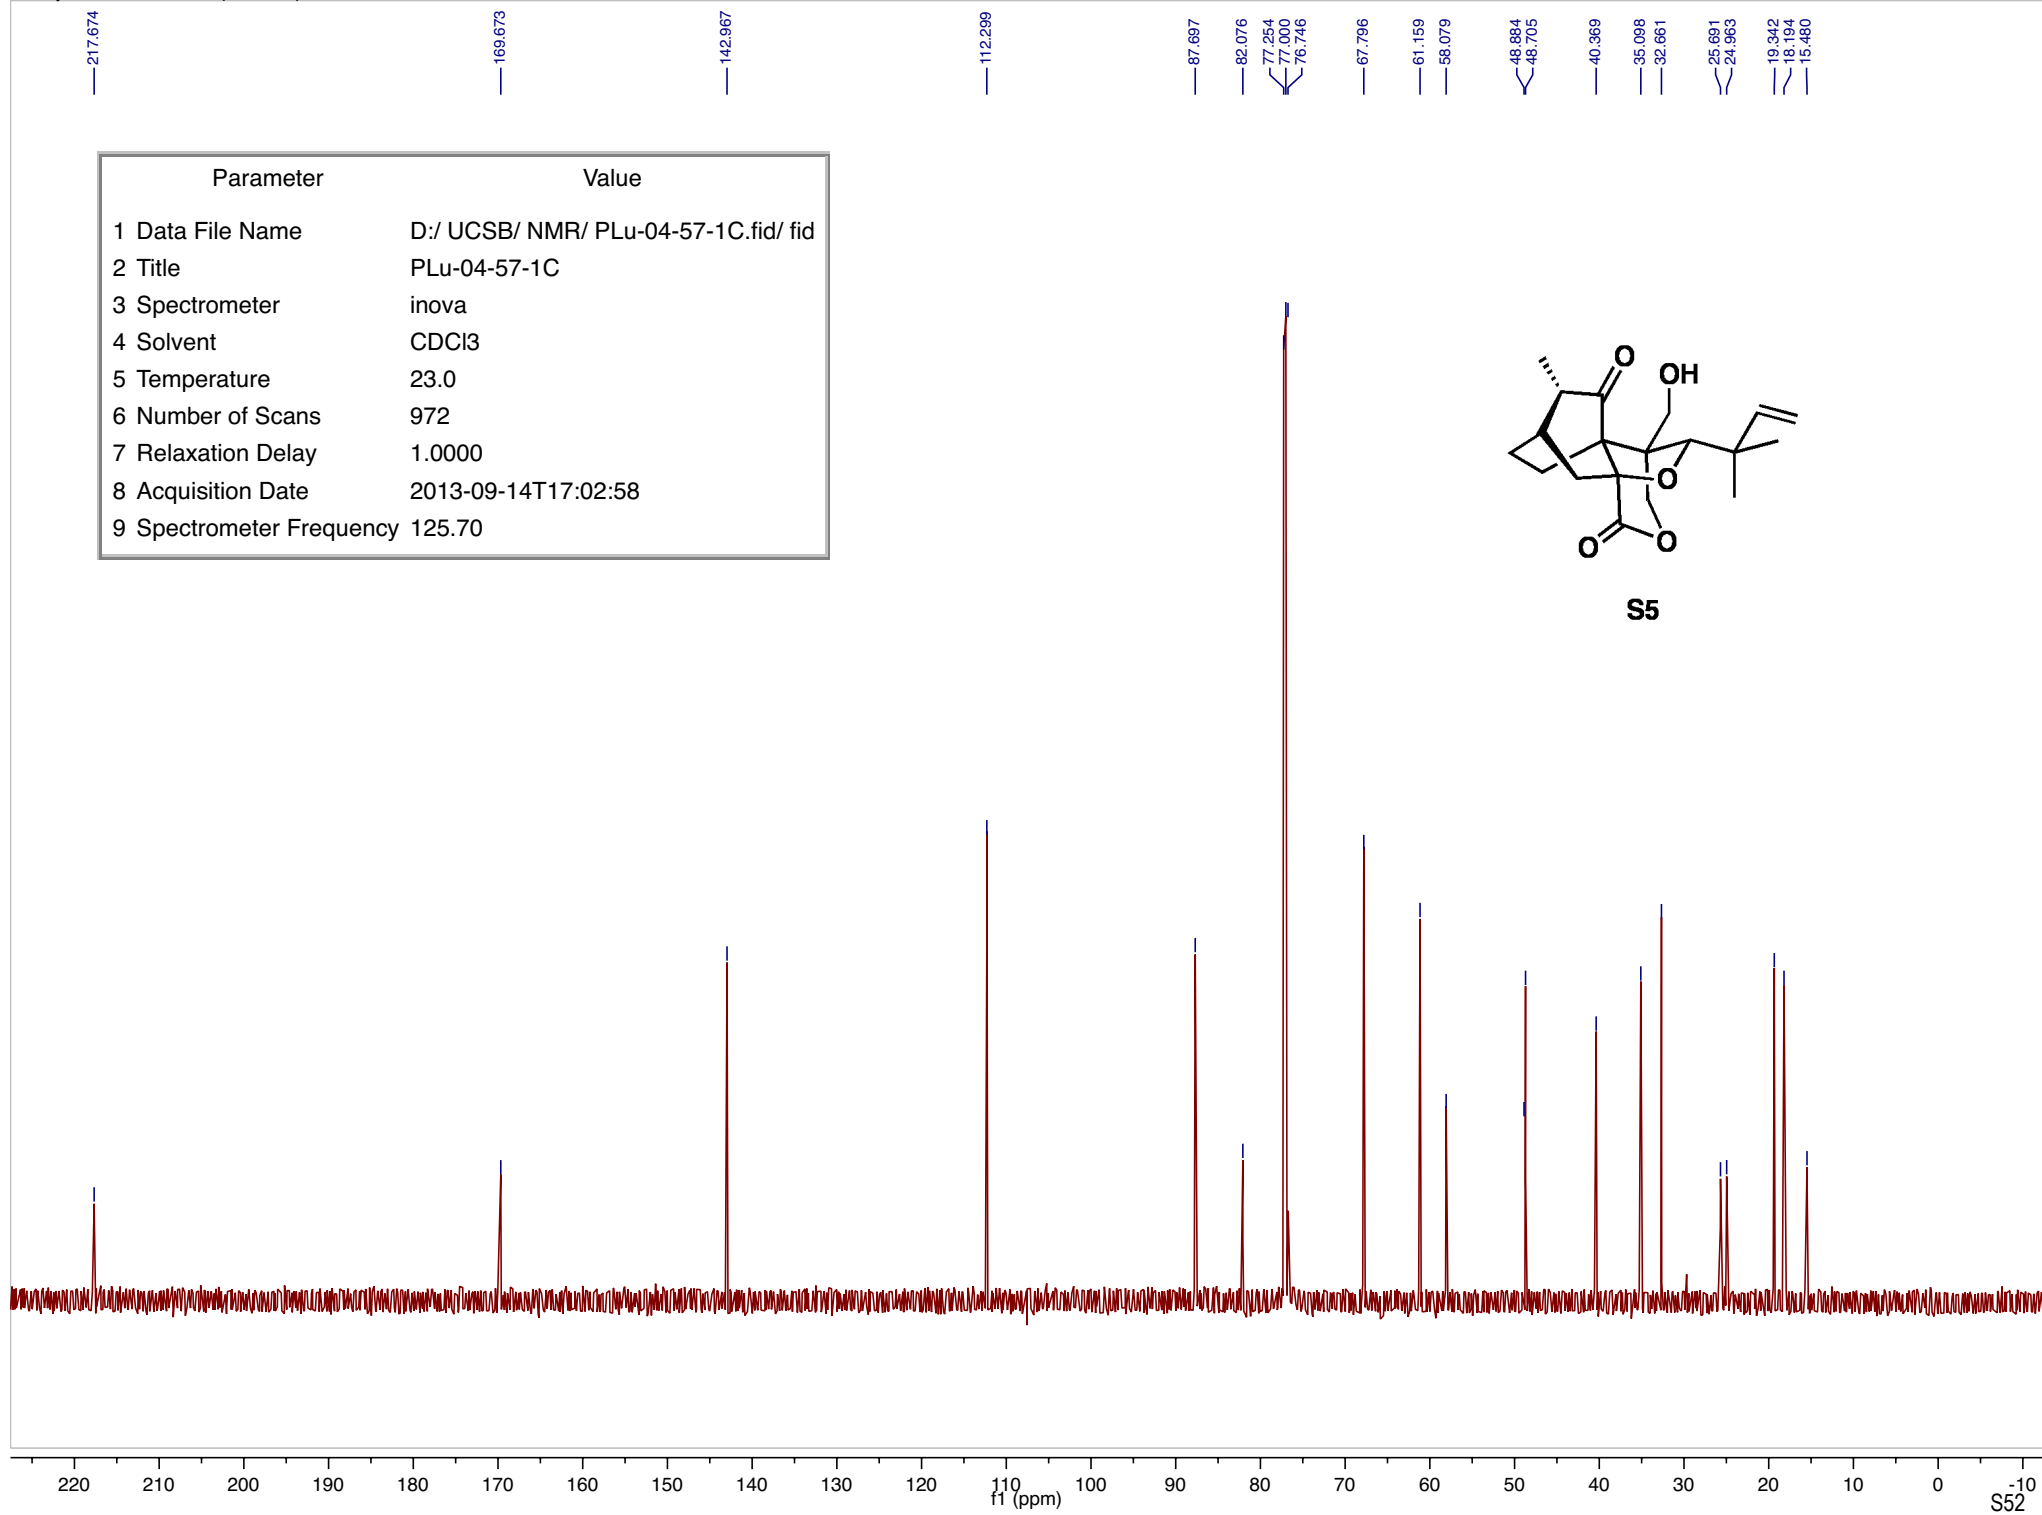

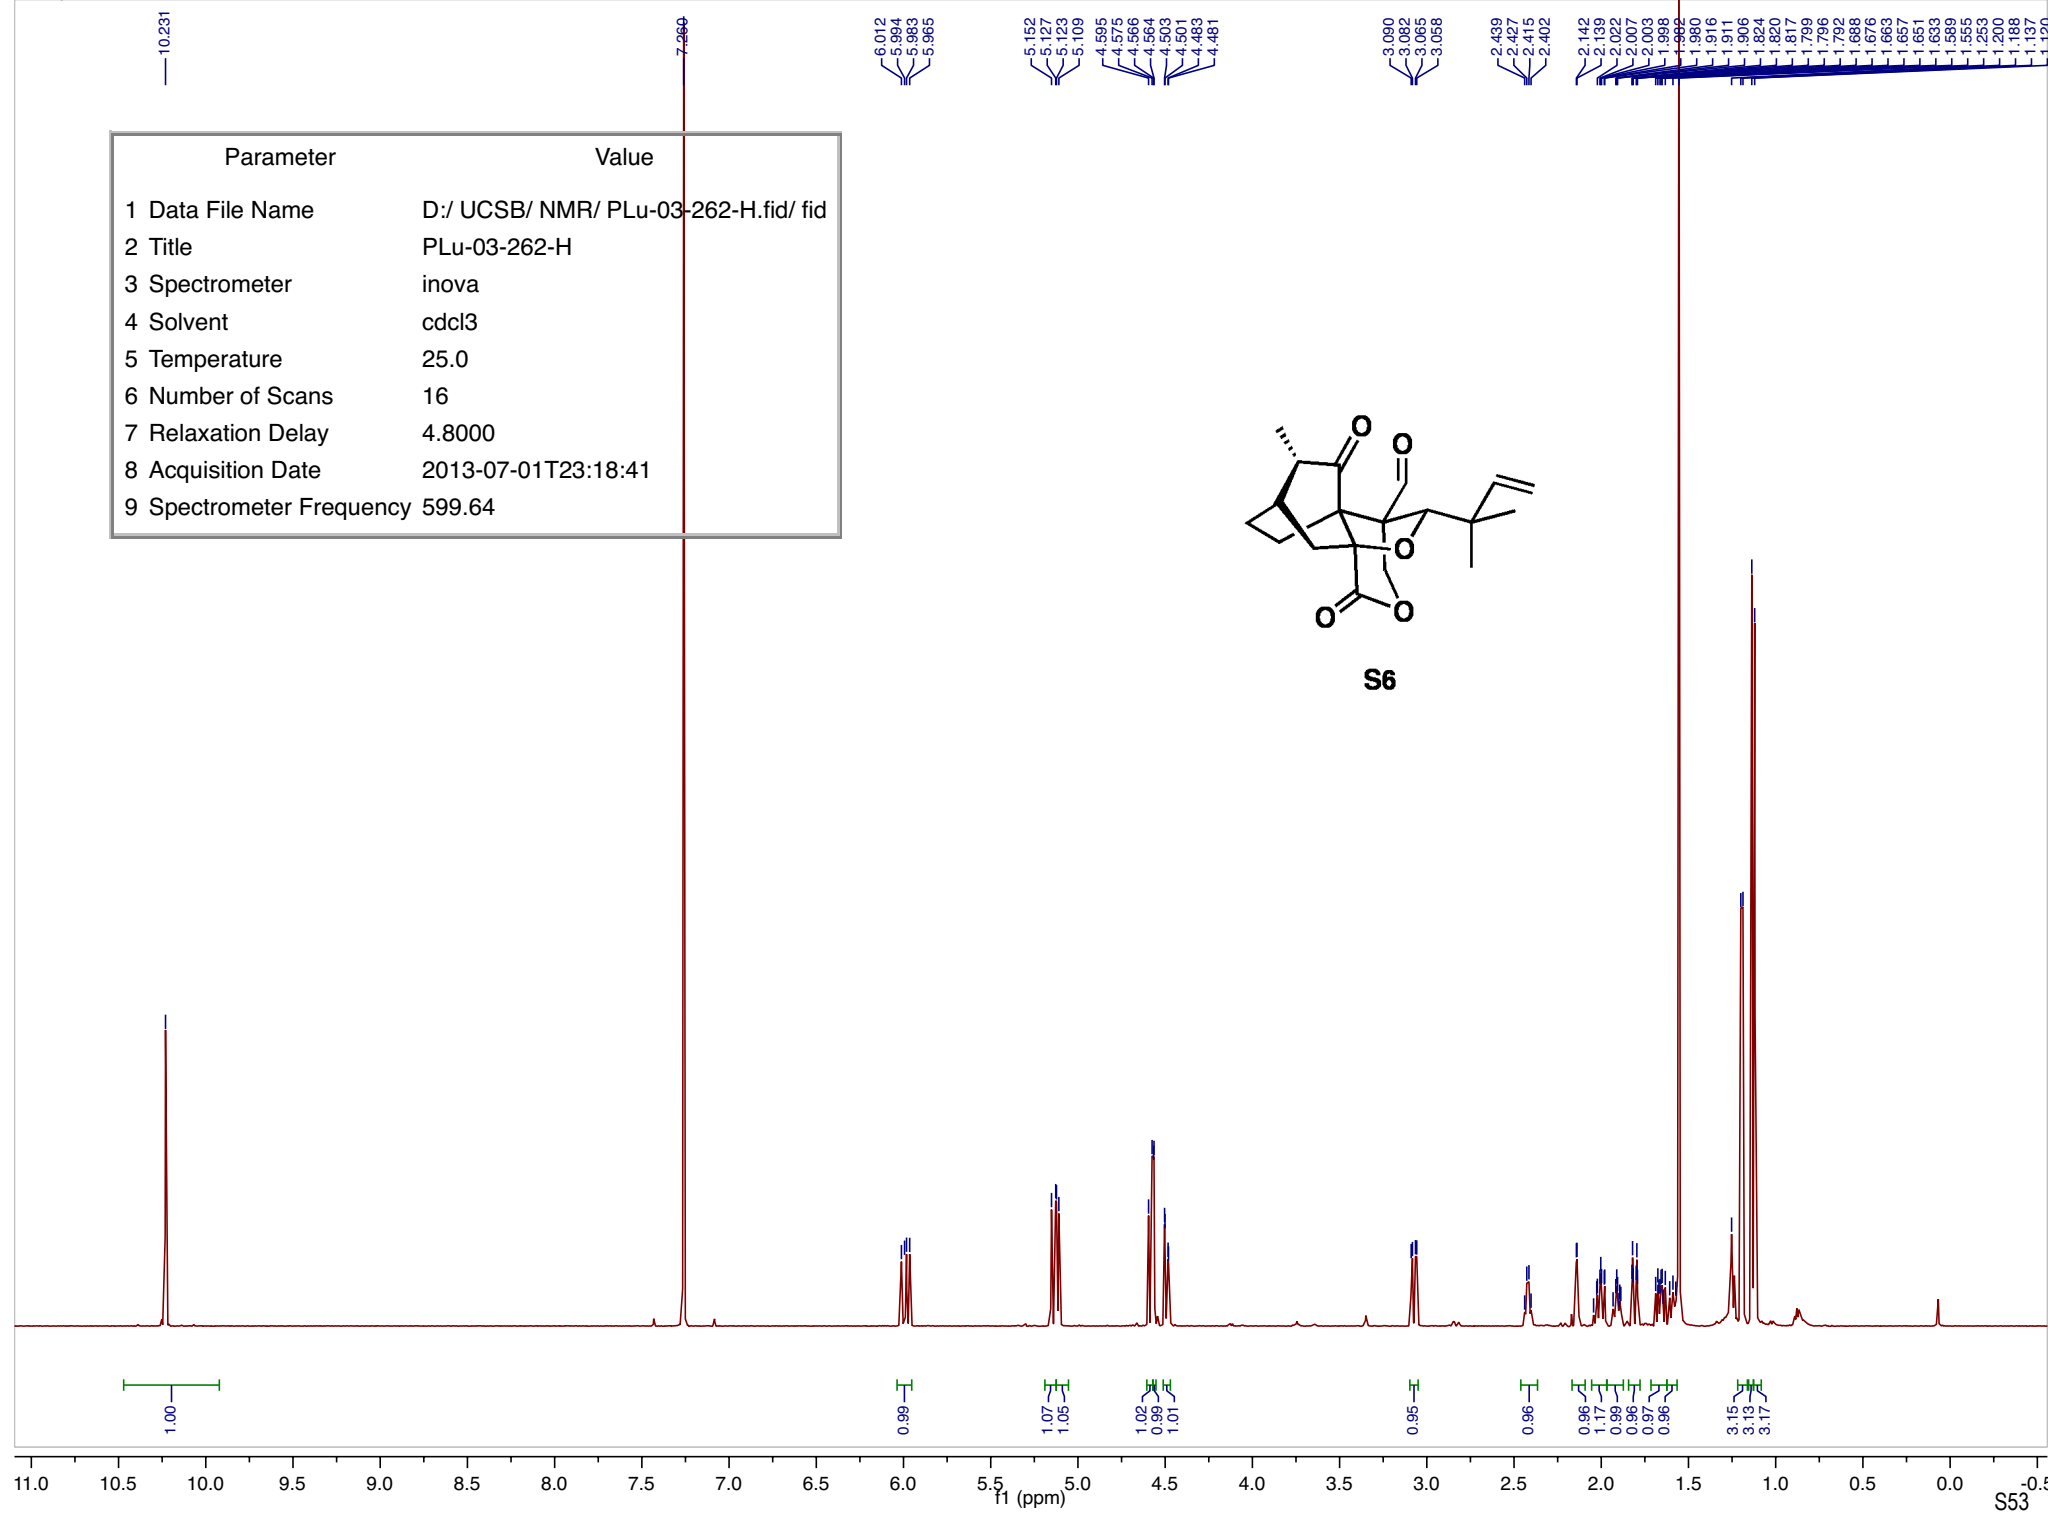

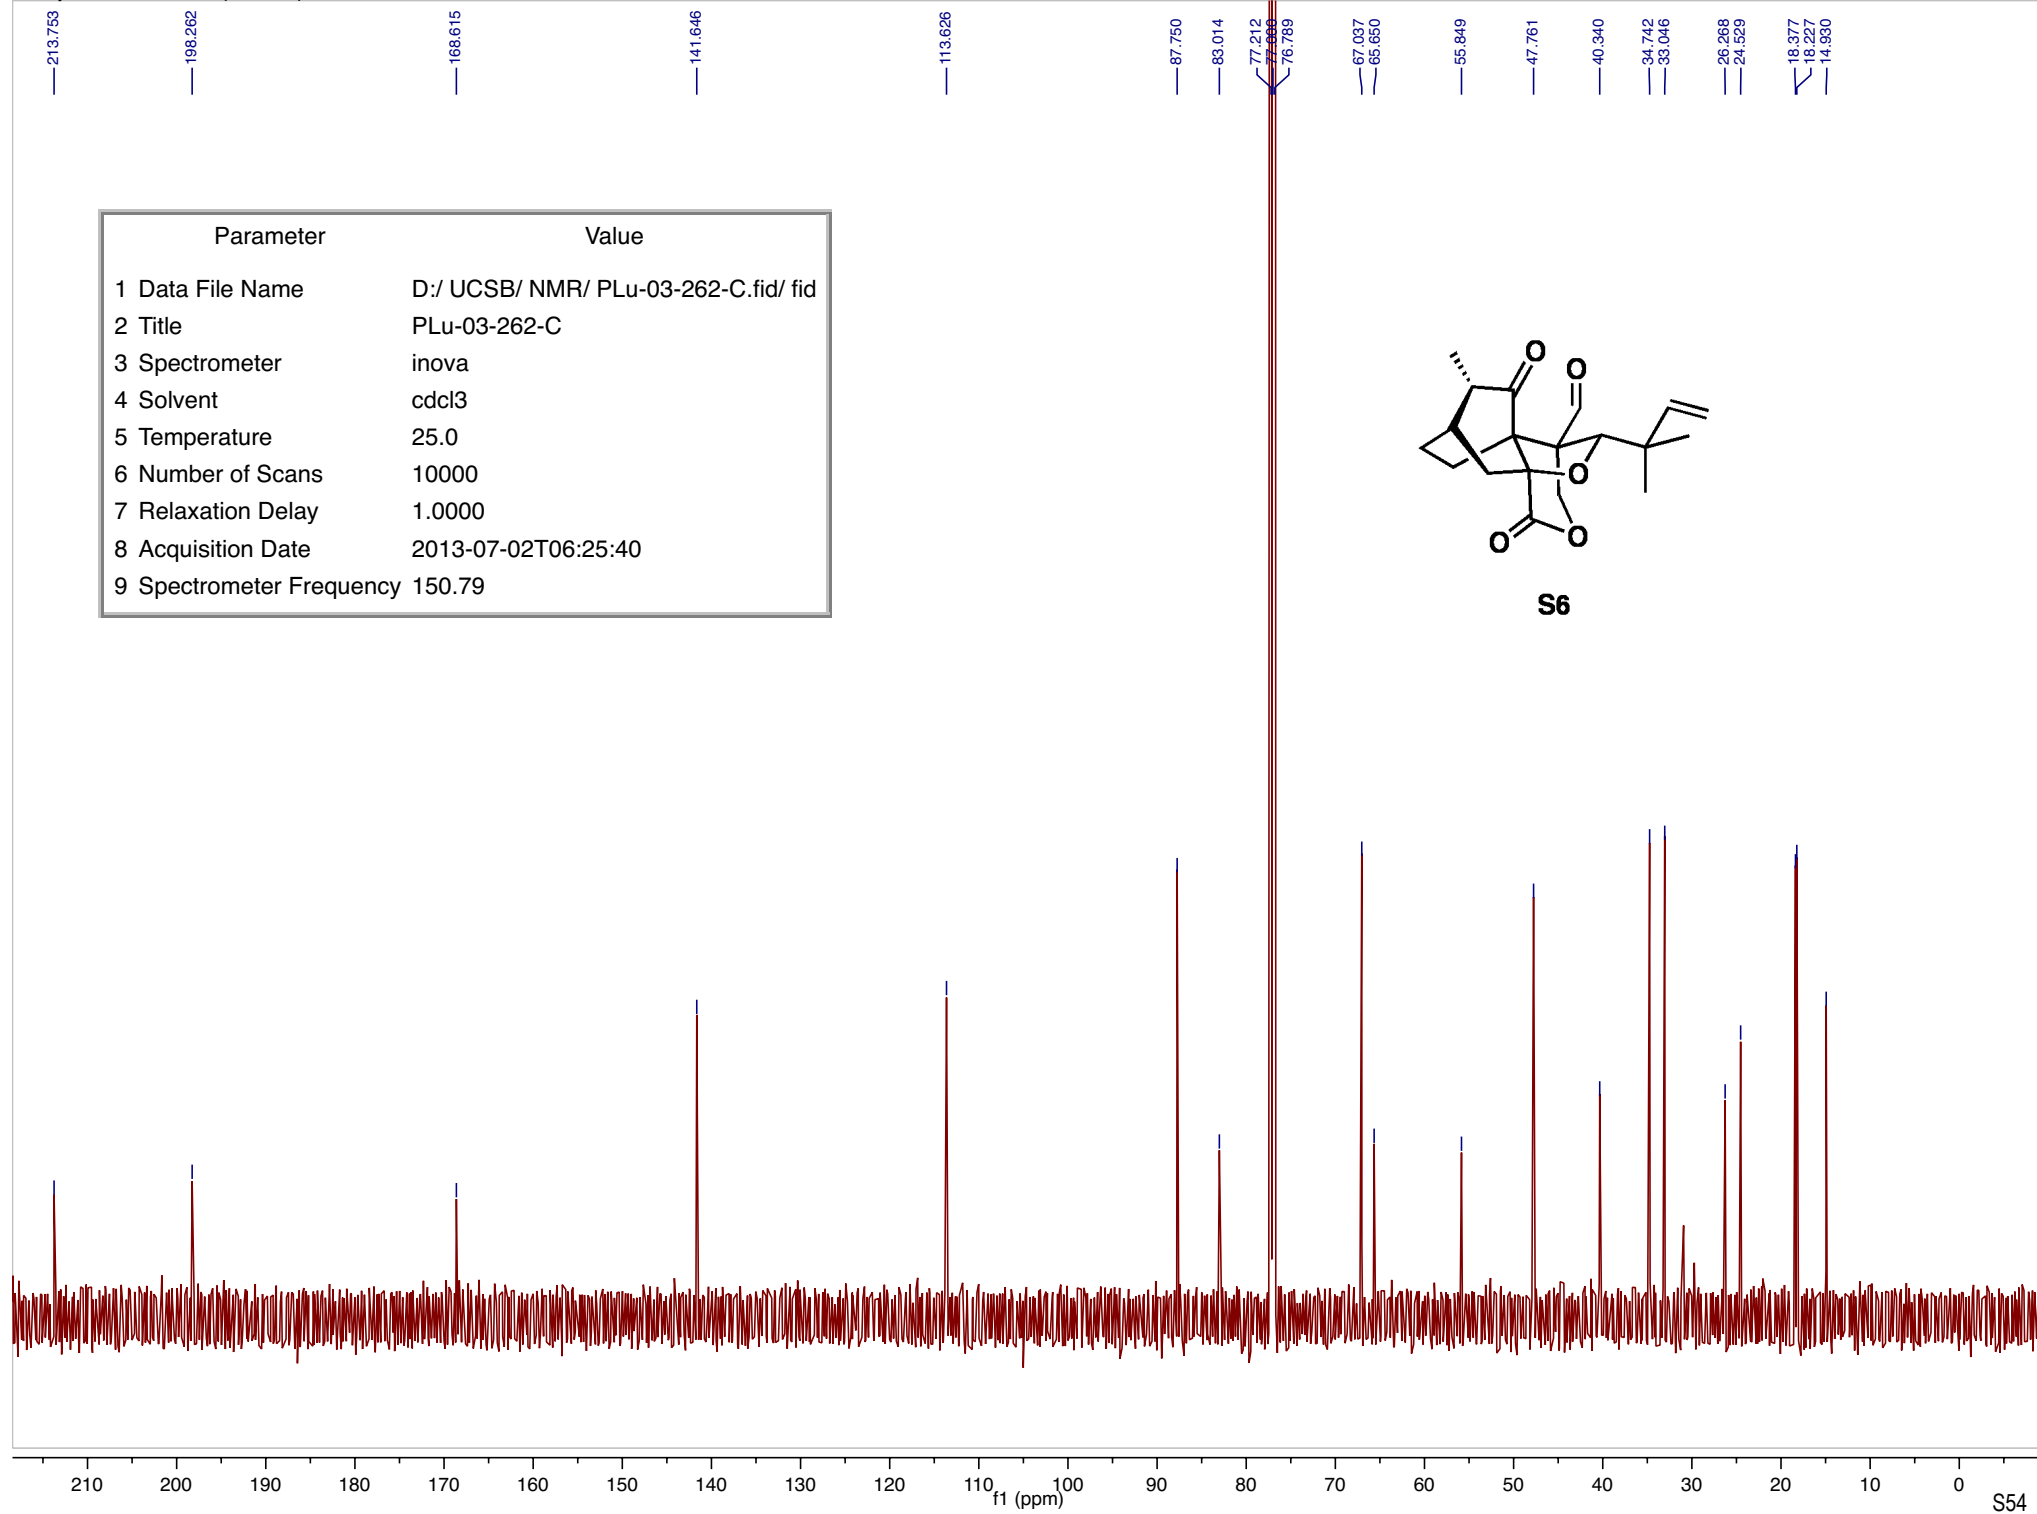

| Parameter                | Value                               |
|--------------------------|-------------------------------------|
| 1 Data File Name         | D:/ UCSB/ NMR/ PLu-04-59-H.fid/ fid |
| 2 Title                  | PLu-04-59-H                         |
| 3 Spectrometer           | inova                               |
| 4 Solvent                | CDCl <sub>3</sub>                   |
| 5 Temperature            | 23.0                                |
| 6 Number of Scans        | 16                                  |
| 7 Relaxation Delay       | 4.8000                              |
| 8 Acquisition Date       | 2013-09-16T21:25:11                 |
| 9 Spectrometer Frequency | 499.86                              |

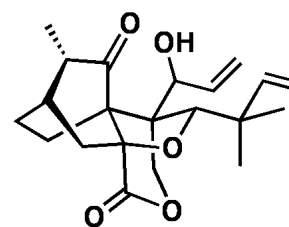

22

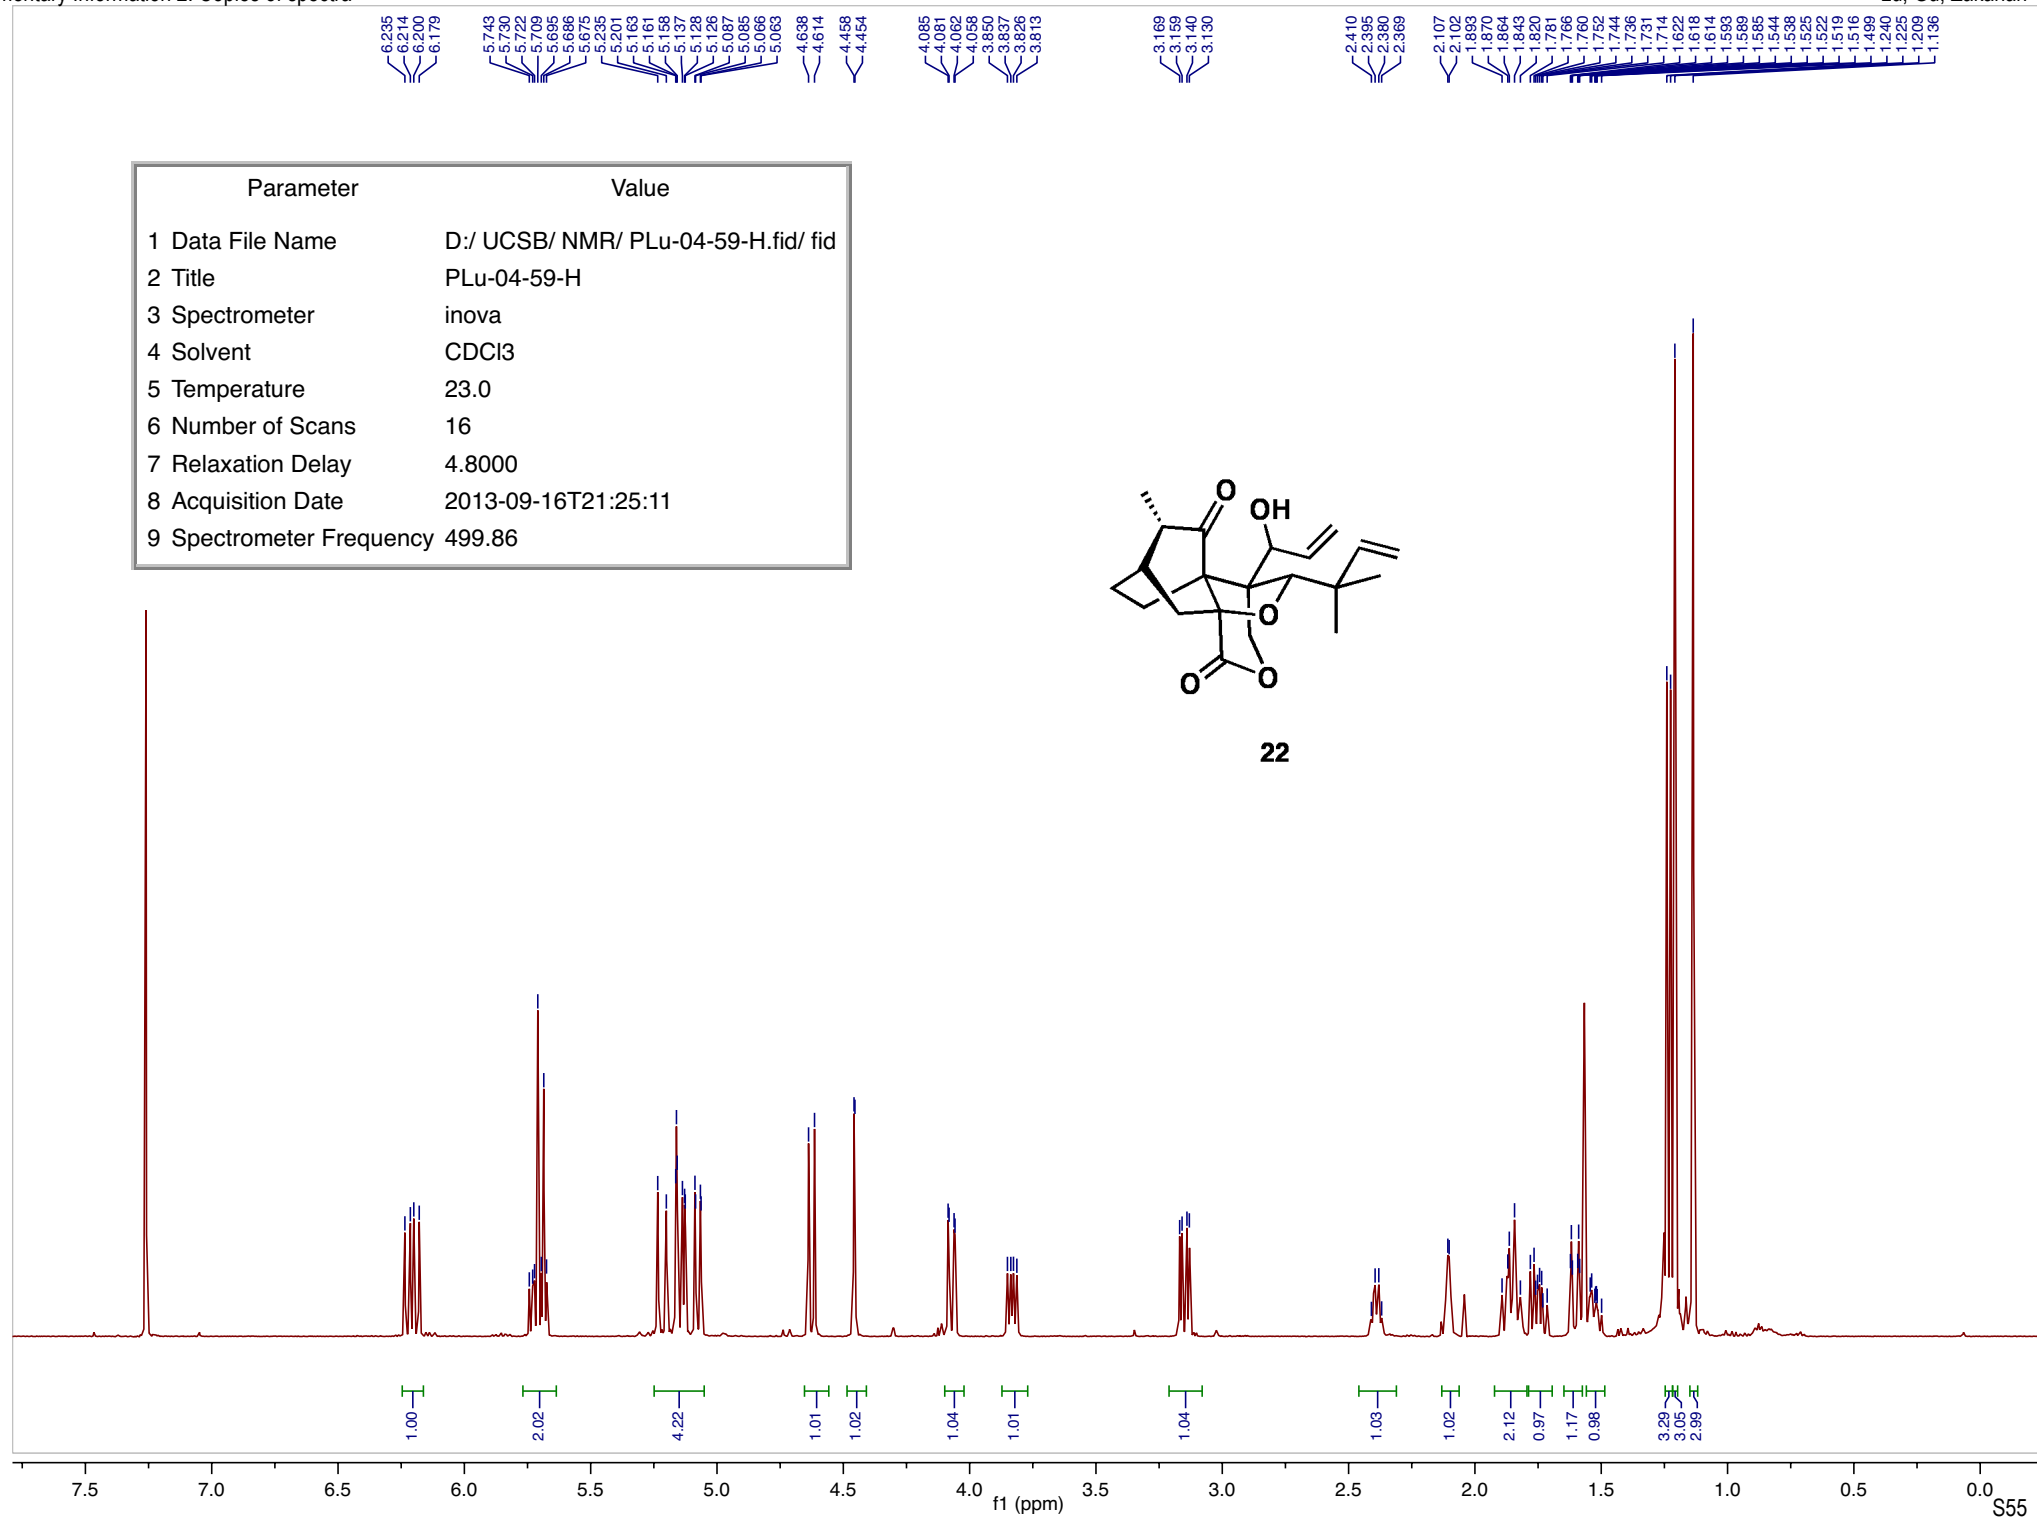

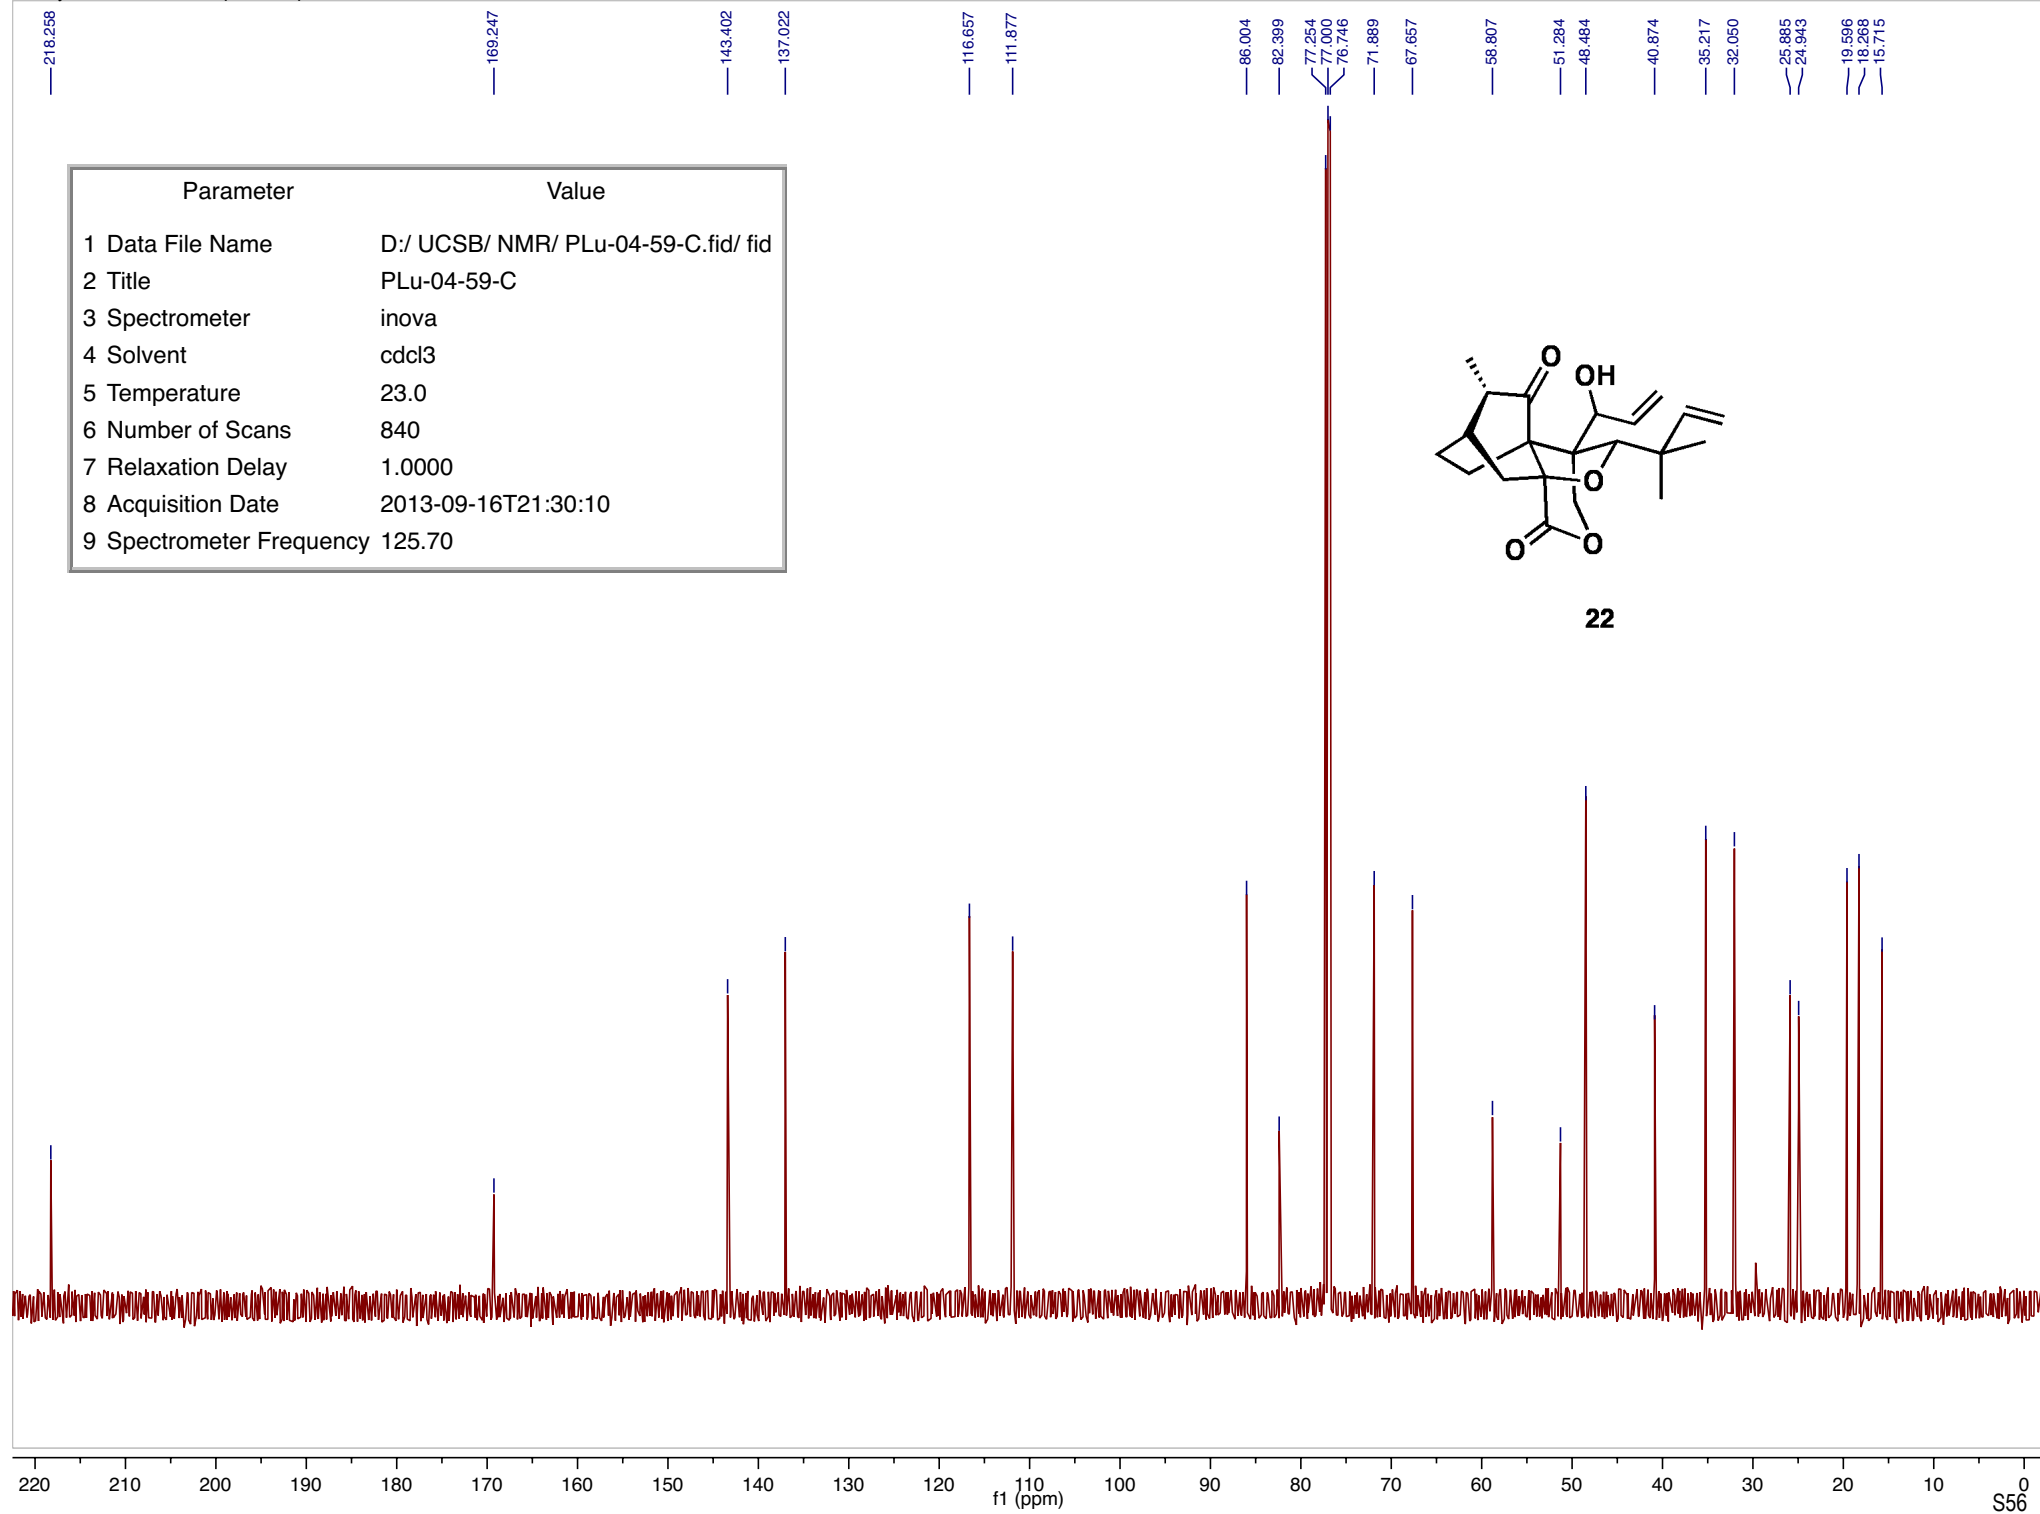



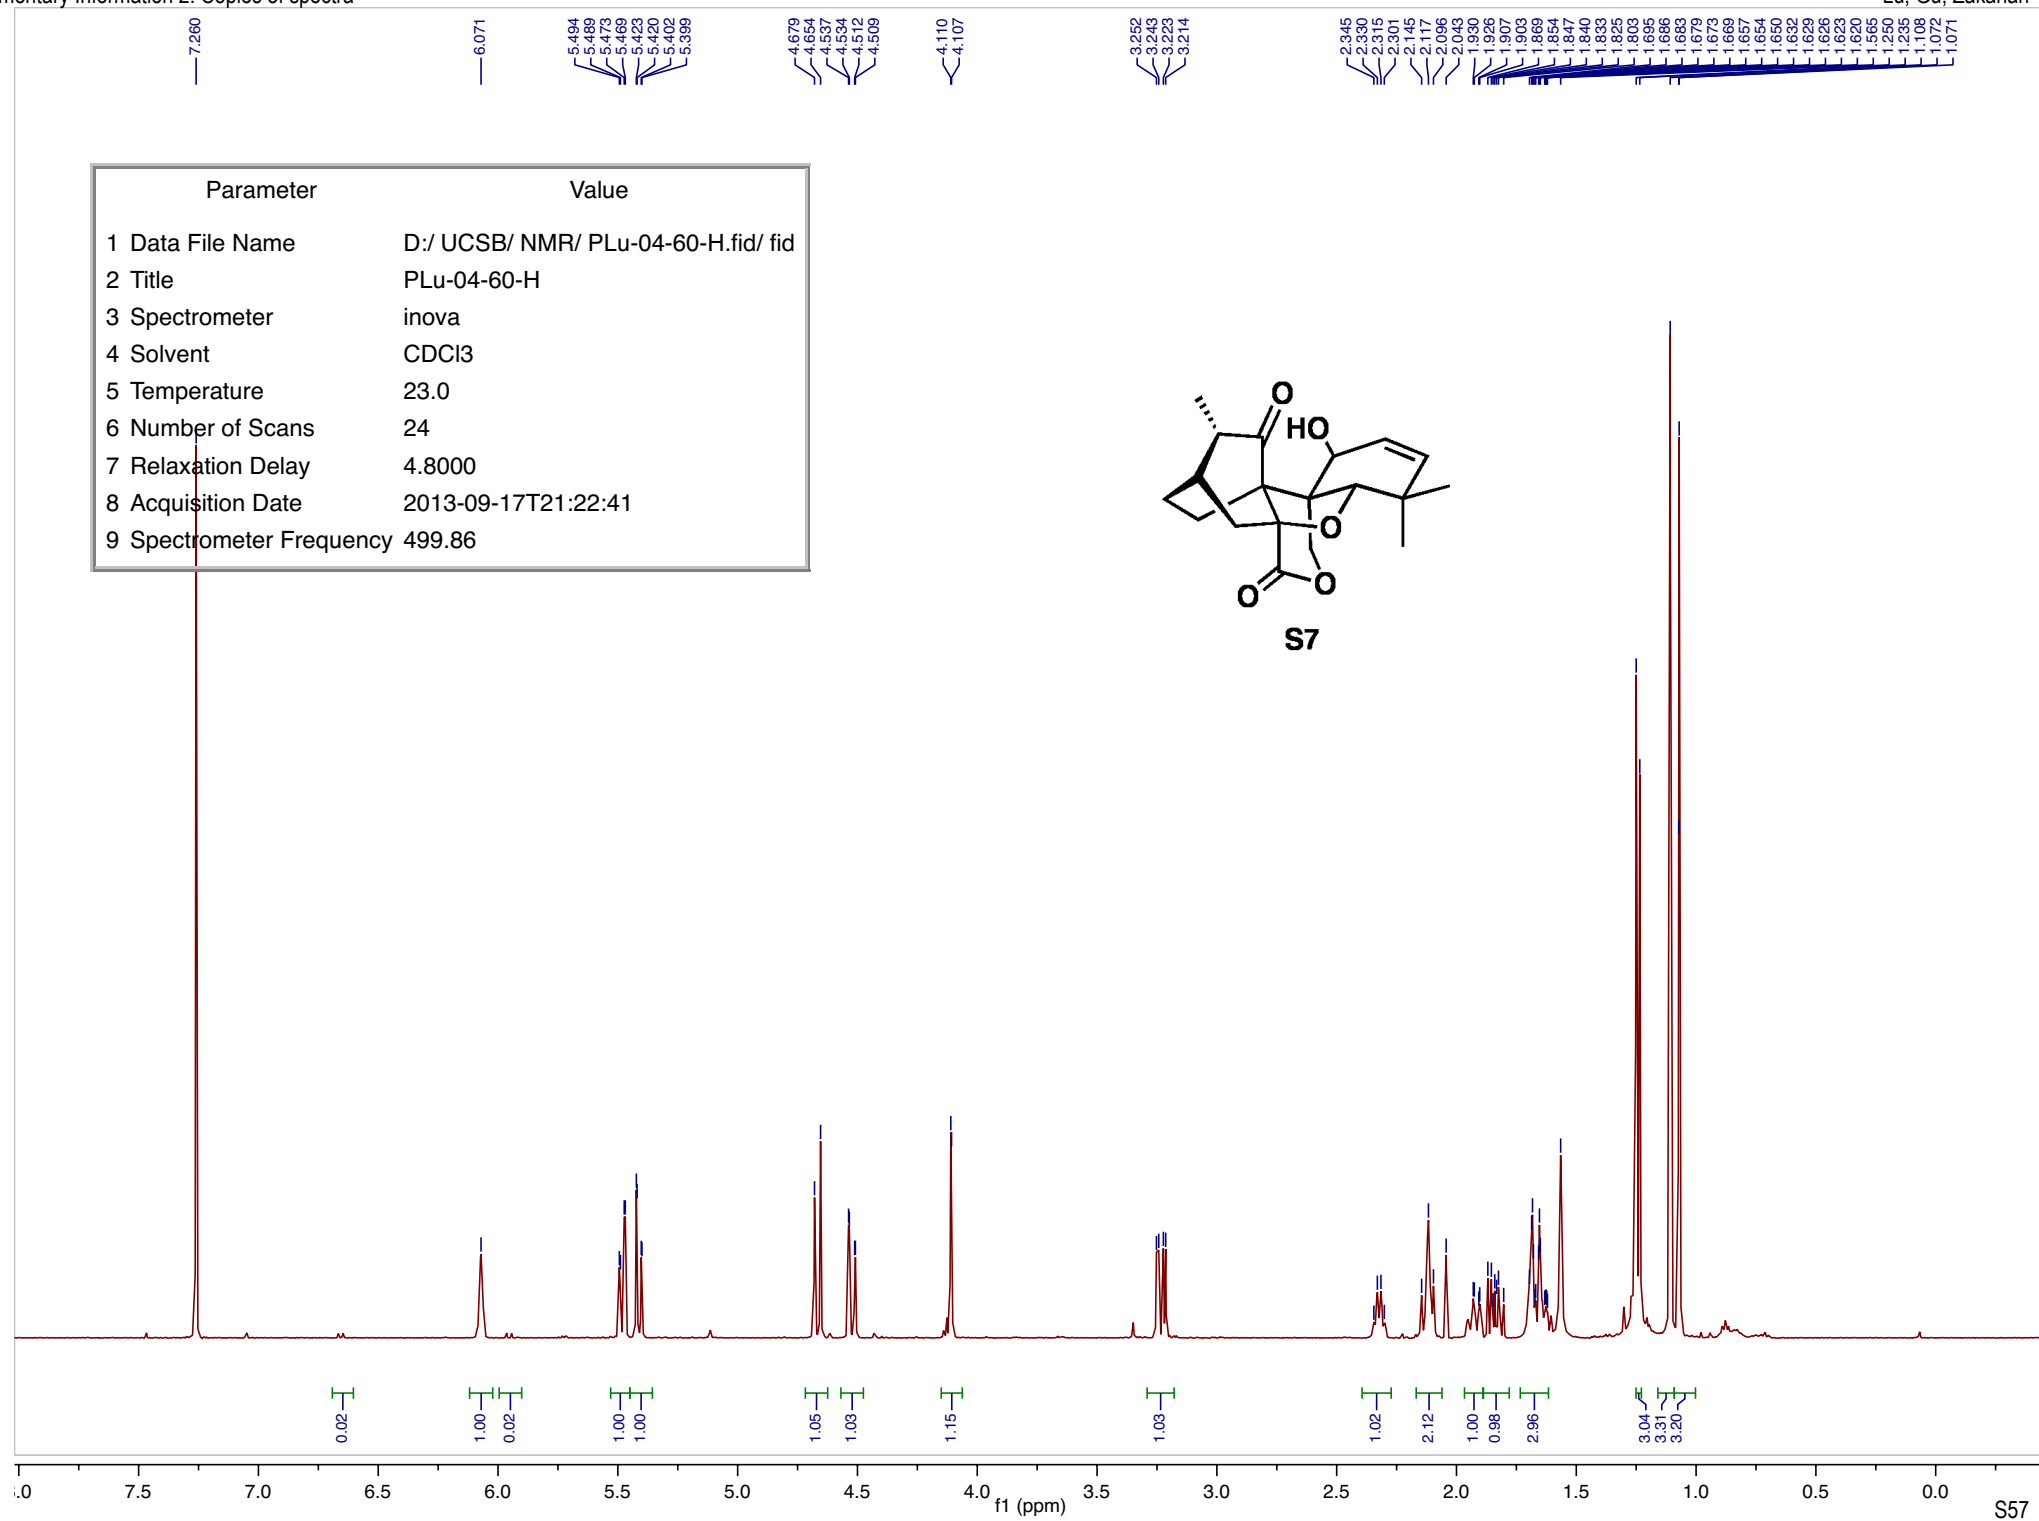

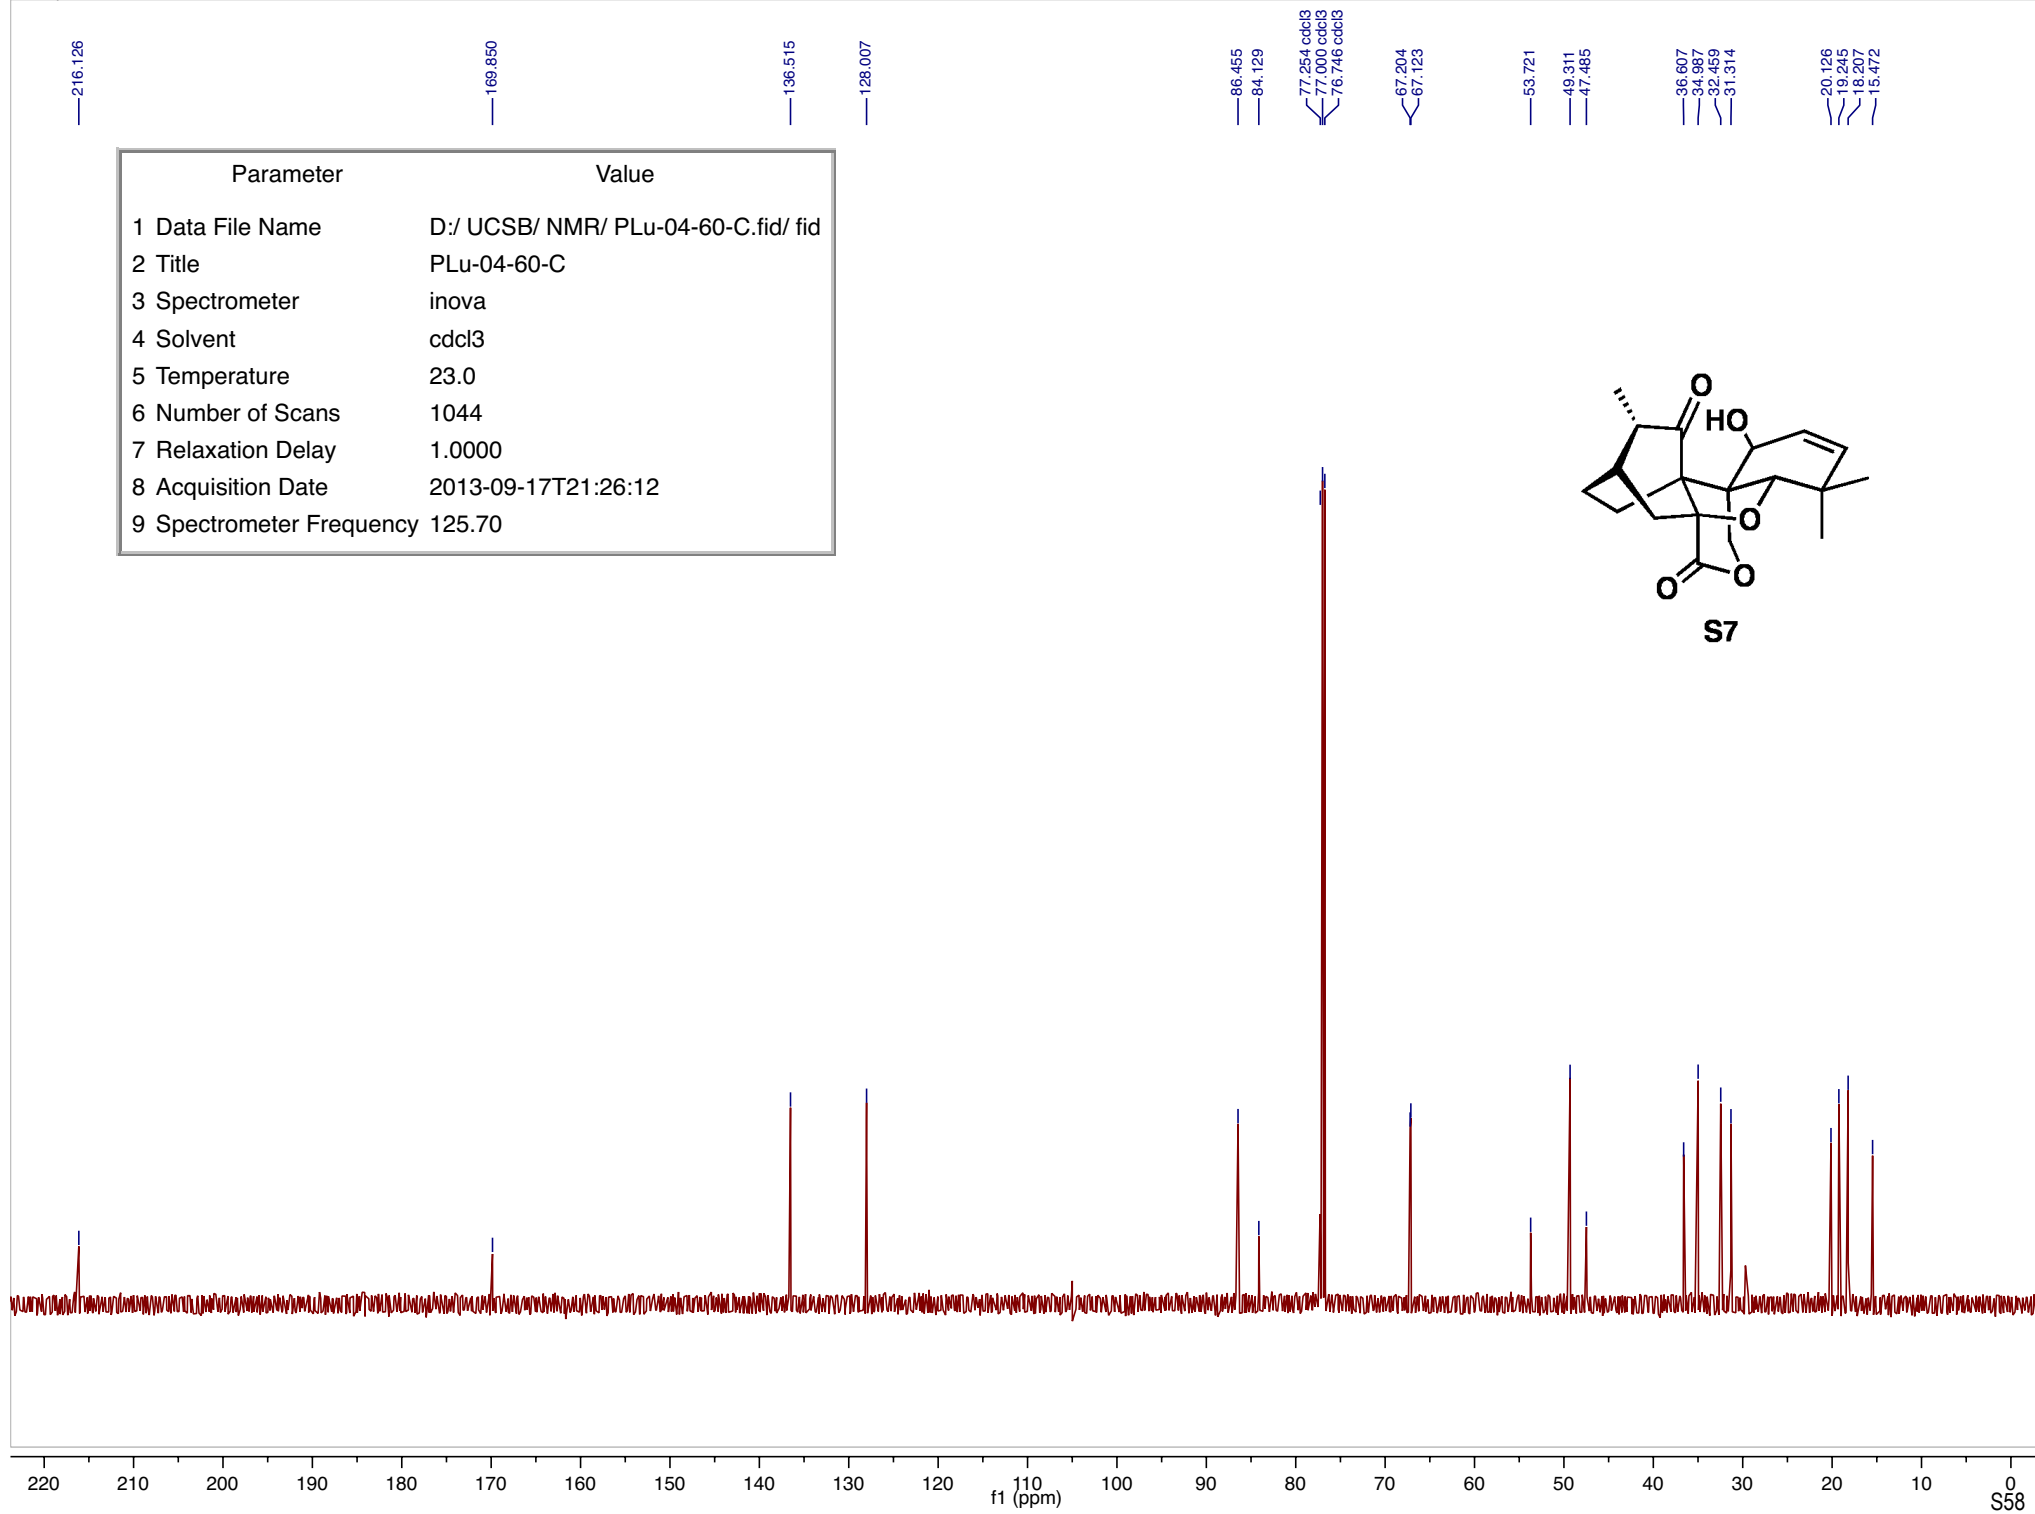

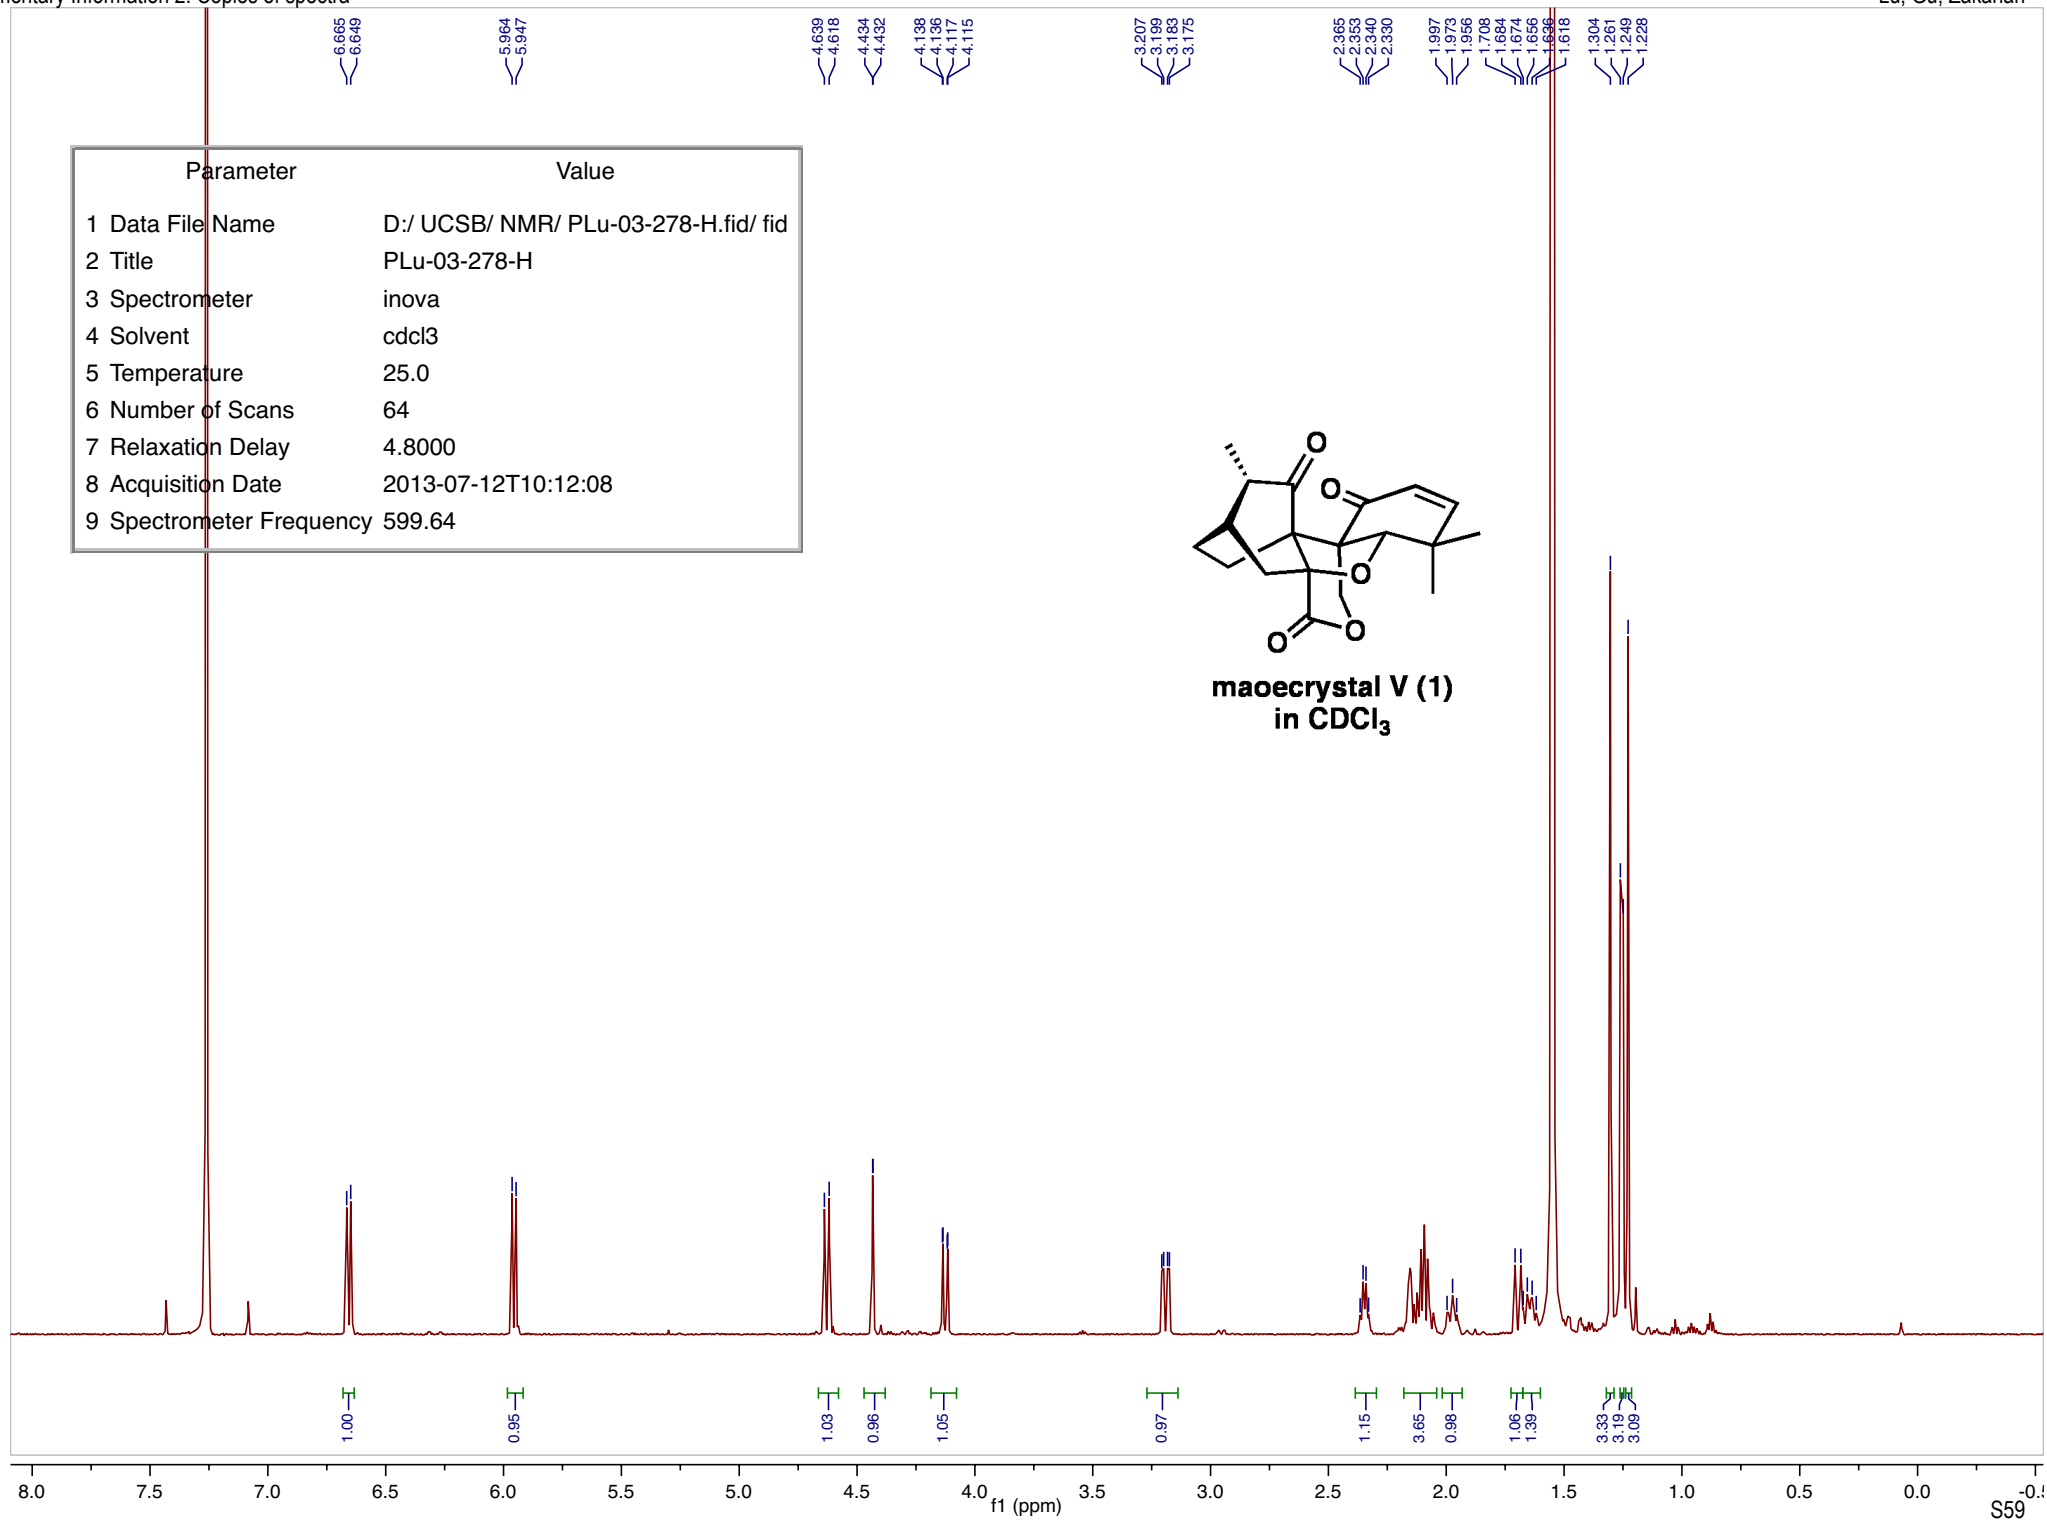

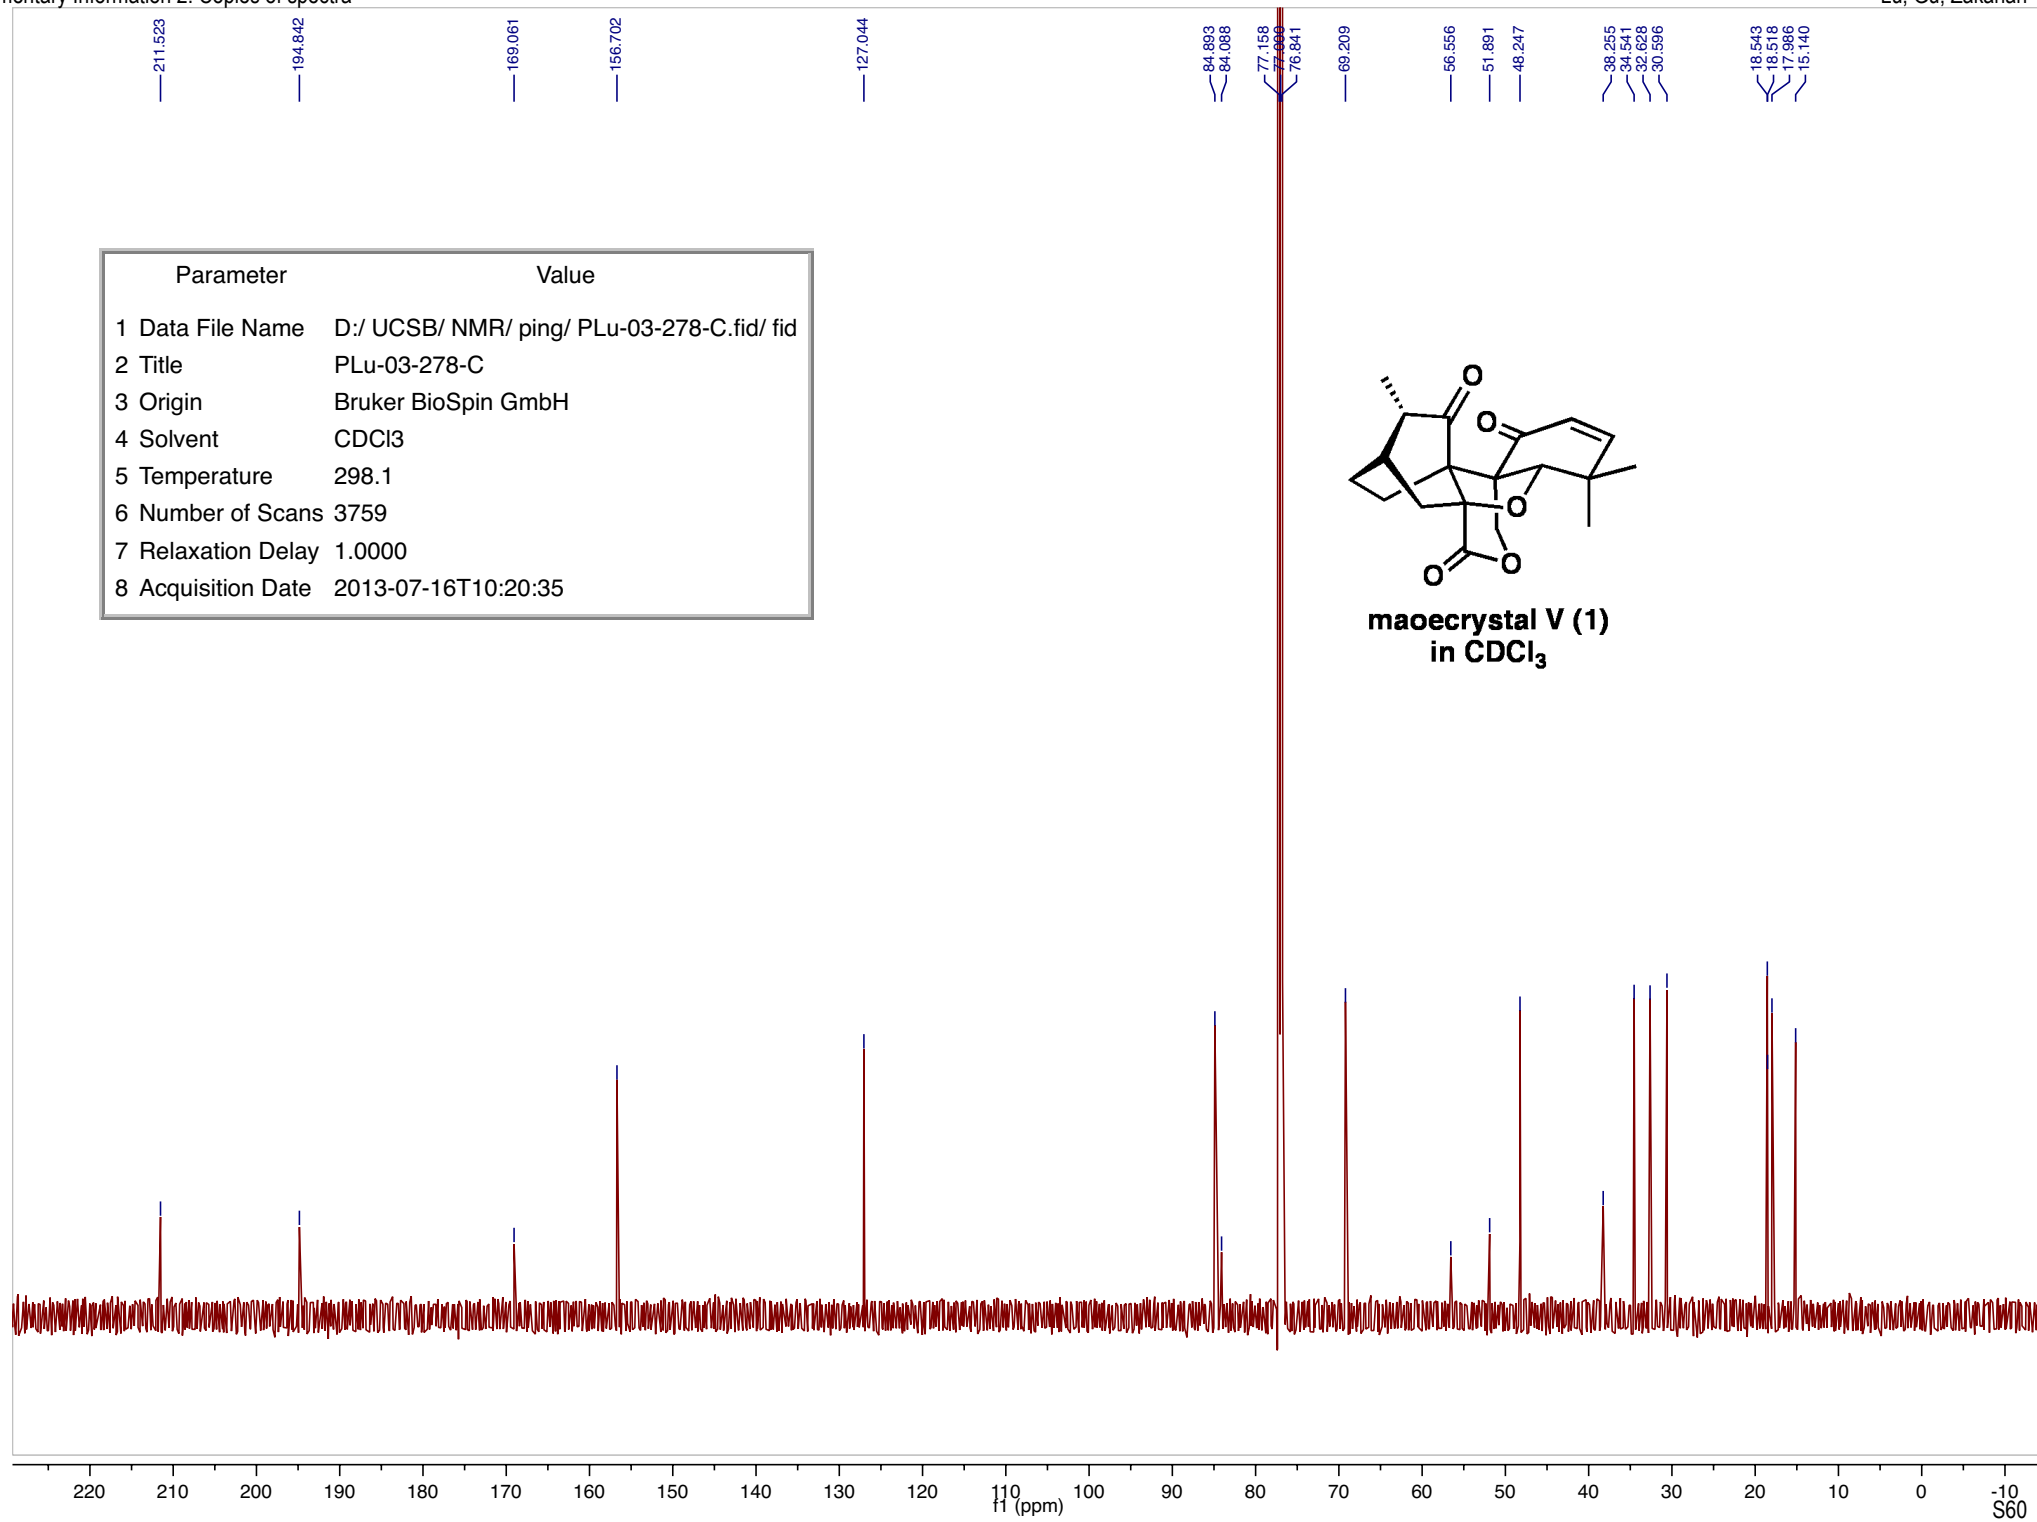

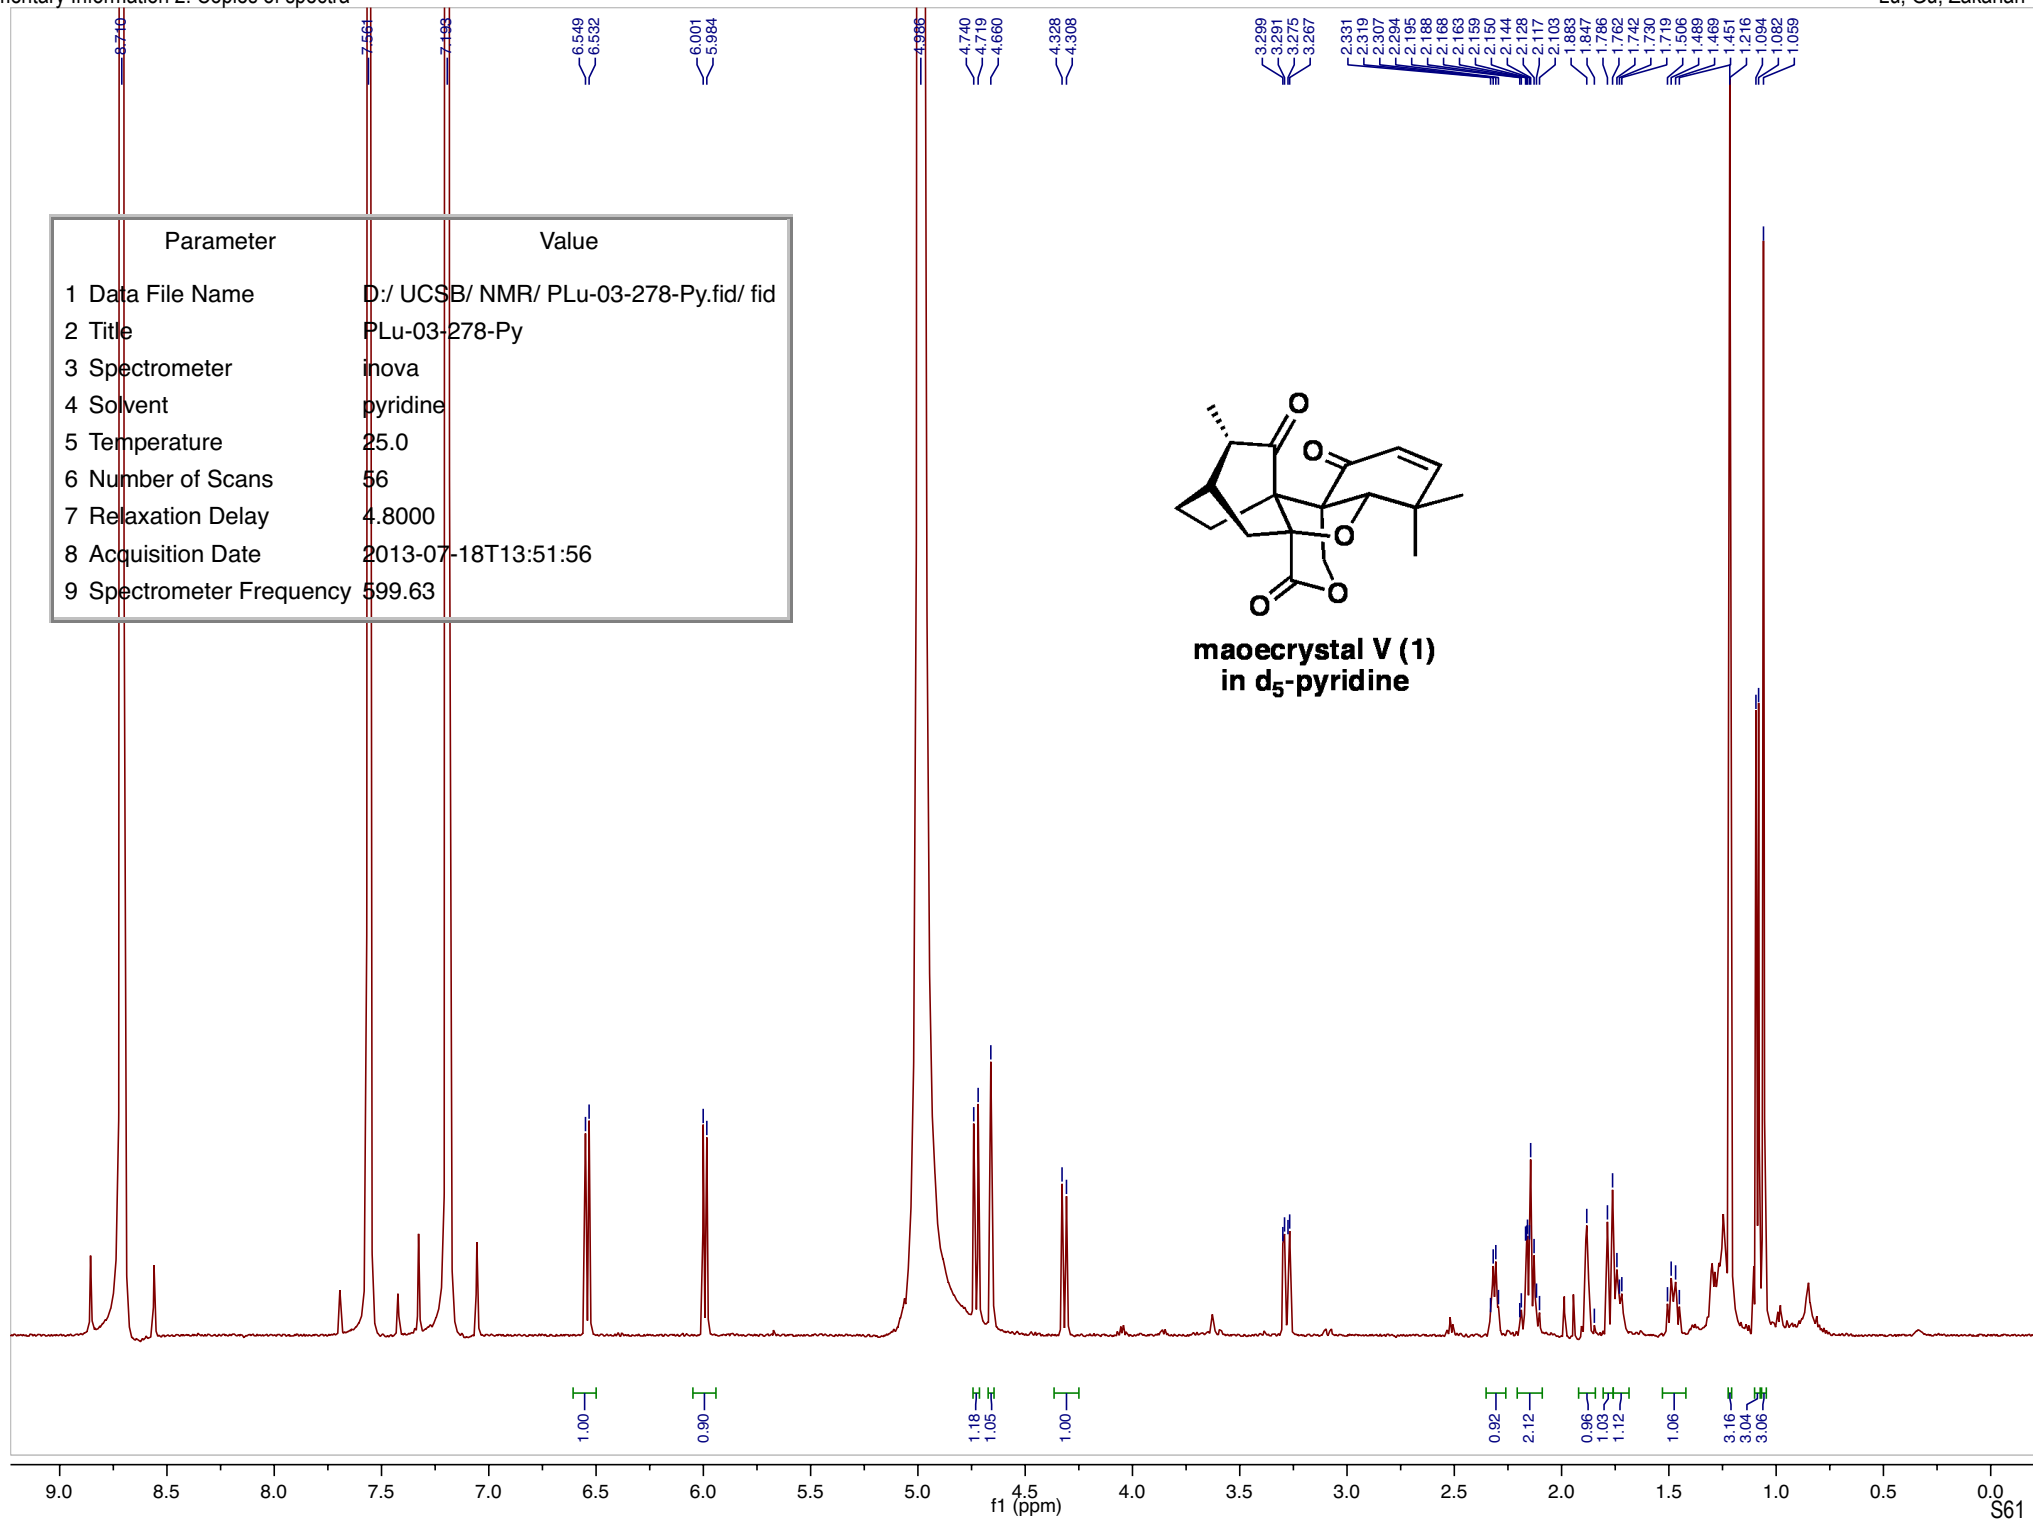

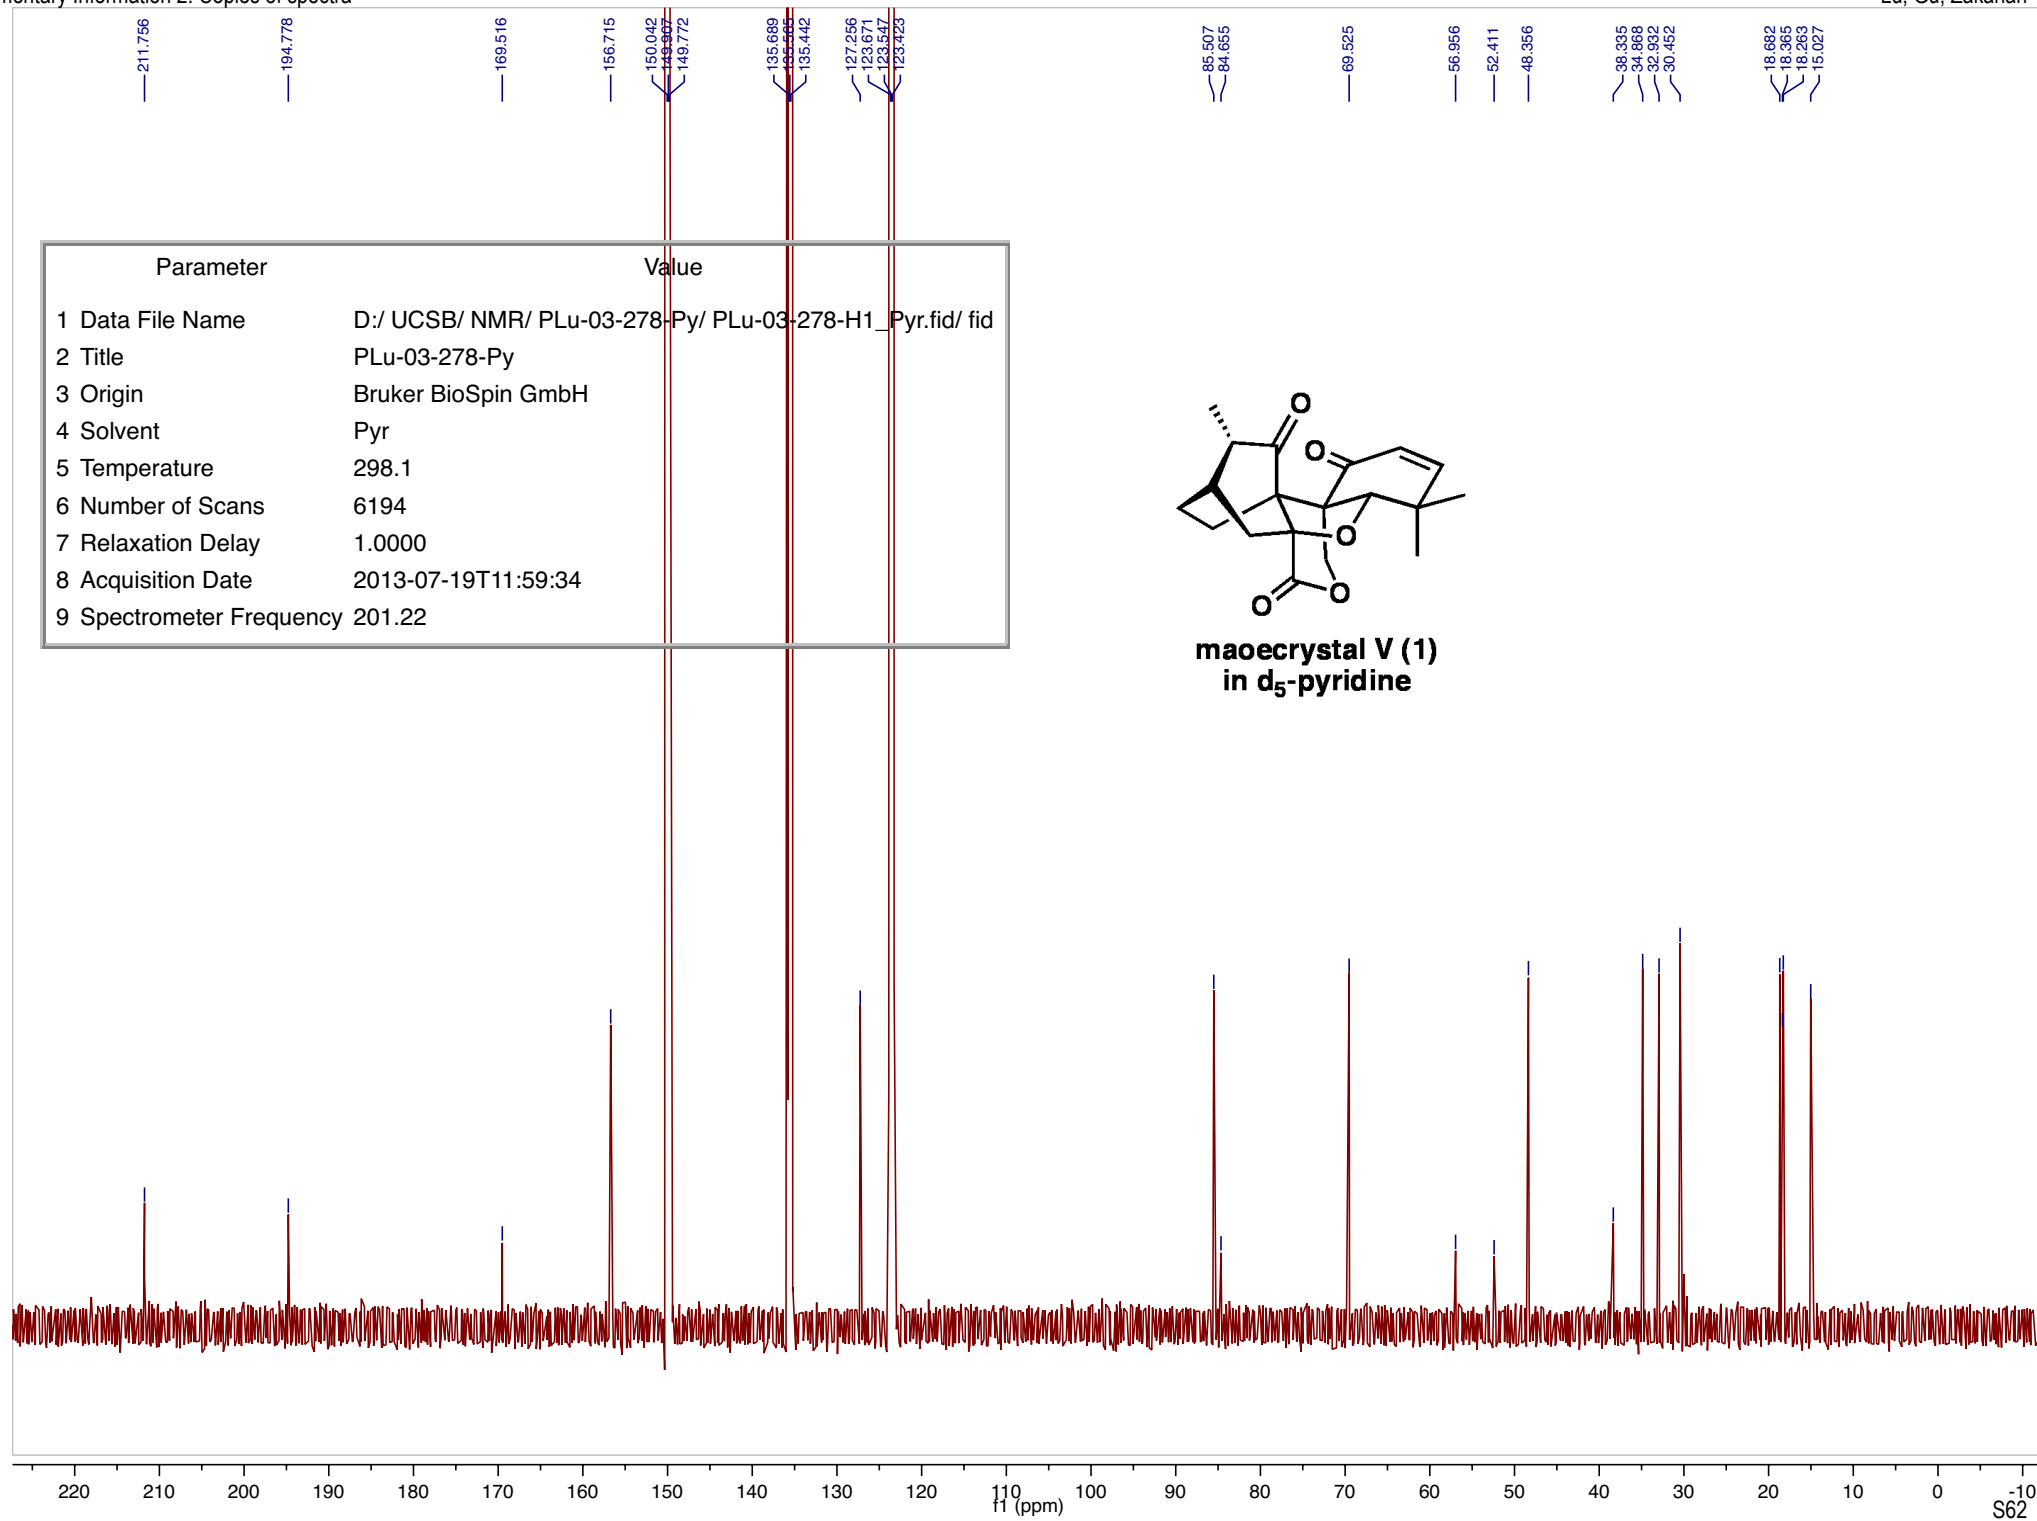

Supplement: NIHMS603616-supplement-Suppl_Data2.pdf [file NIHMS603616-supplement-Suppl_Data2.pdf]
